# Supplementary material
Source: publisher figshare collection journal article supplement (https://acs.figshare.com/ndownloader/files/6565065)
Supplement: Supplementary file 1 [file 6565065]

data_tcd487
_audit_creation_date              2016-04-18
_audit_creation_method
;
Olex2 1.2
(compiled 2016.02.19 svn.r3266 for OlexSys, GUI svn.r5155)
;
_publ_contact_author_address      ?
_publ_contact_author_email        ?
_publ_contact_author_name         ''
_publ_contact_author_phone        ?
_publ_section_references
;
Bruker (2008-2014). XP, Bruker AXS Inc., Madison, WI, USA.
  
Bruker (2013). SAINT v8.34A, Bruker AXS Inc., Madison, WI, USA.

Bruker (2014/5). SADABS, Bruker AXS Inc., Madison, Wisconsin, USA.

Bruker (2015). APEX3 v2015.9-0, Bruker AXS Inc., Madison, WI, USA.

Dolomanov, O.V., Bourhis, L.J., Gildea, R.J, Howard, J.A.K. & Puschmann, H.
 (2009), J. Appl. Cryst. 42, 339-341.

Sheldrick, G.M. (2008). Acta Cryst. A64, 112-122.

Sheldrick, G.M. (2015). Acta Cryst. A71, 3-8.
;
_chemical_name_common             ?
_chemical_name_systematic         ?
_chemical_formula_moiety          'C25 H24 N4 Ni O2'
_chemical_formula_sum             'C25 H24 N4 Ni O2'
_chemical_formula_weight          471.19
_chemical_melting_point           ?
loop_
  _atom_type_symbol
  _atom_type_description
  _atom_type_scat_dispersion_real
  _atom_type_scat_dispersion_imag
  _atom_type_scat_source
 'C' 'C' 0.0033 0.0016 'International Tables Vol C Tables 4.2.6.8 and 6.1.1.4'
 'H' 'H' 0.0000 0.0000 'International Tables Vol C Tables 4.2.6.8 and 6.1.1.4'
 'N' 'N' 0.0061 0.0033 'International Tables Vol C Tables 4.2.6.8 and 6.1.1.4'
 'Ni' 'Ni' 0.3393 1.1124 'International Tables Vol C Tables 4.2.6.8 and 6.1.1.4'
 'O' 'O' 0.0106 0.0060 'International Tables Vol C Tables 4.2.6.8 and 6.1.1.4'

_shelx_space_group_comment
;
The symmetry employed for this shelxl refinement is uniquely defined
by the following loop, which should always be used as a source of
symmetry information in preference to the above space-group names.
They are only intended as comments.
;
_space_group_crystal_system       'monoclinic'
_space_group_IT_number            14
_space_group_name_H-M_alt         'P 1 21/c 1'
_space_group_name_Hall            '-P 2ybc'
loop_
  _space_group_symop_operation_xyz
 'x, y, z'
 '-x, y+1/2, -z+1/2'
 '-x, -y, -z'
 'x, -y-1/2, z-1/2'

_cell_length_a                    13.9373(10)
_cell_length_b                    11.6859(8)
_cell_length_c                    14.2687(9)
_cell_angle_alpha                 90
_cell_angle_beta                  101.5569(17)
_cell_angle_gamma                 90
_cell_volume                      2276.8(3)
_cell_formula_units_Z             4
_cell_measurement_reflns_used     6983
_cell_measurement_temperature     100(2)
_cell_measurement_theta_max       27.97
_cell_measurement_theta_min       2.87
_shelx_estimated_absorpt_T_max    0.909
_shelx_estimated_absorpt_T_min    0.830
_exptl_absorpt_coefficient_mu     0.881
_exptl_absorpt_correction_T_max   0.7456
_exptl_absorpt_correction_T_min   0.6992
_exptl_absorpt_correction_type    multi-scan
_exptl_absorpt_process_details
;
SADABS-2014/5 (Bruker,2014/5) was used for absorption correction.
wR2(int) was 0.0546 before and 0.0467 after correction.
The Ratio of minimum to maximum transmission is 0.9378.
The \l/2 correction factor is 0.00150.
;
_exptl_absorpt_special_details    ?
_exptl_crystal_colour             'clear orange'
_exptl_crystal_colour_lustre      clear
_exptl_crystal_colour_primary     orange
_exptl_crystal_density_diffrn     1.375
_exptl_crystal_density_meas       ?
_exptl_crystal_density_method     ?
_exptl_crystal_description        block
_exptl_crystal_F_000              984
_exptl_crystal_size_max           0.22
_exptl_crystal_size_mid           0.13
_exptl_crystal_size_min           0.11
_exptl_transmission_factor_max    ?
_exptl_transmission_factor_min    ?
_diffrn_reflns_av_R_equivalents   0.0433
_diffrn_reflns_av_unetI/netI      0.0623
_diffrn_reflns_Laue_measured_fraction_full 0.996
_diffrn_reflns_Laue_measured_fraction_max 0.993
_diffrn_reflns_limit_h_max        18
_diffrn_reflns_limit_h_min        -18
_diffrn_reflns_limit_k_max        15
_diffrn_reflns_limit_k_min        -13
_diffrn_reflns_limit_l_max        13
_diffrn_reflns_limit_l_min        -18
_diffrn_reflns_number             12948
_diffrn_reflns_point_group_measured_fraction_full 0.996
_diffrn_reflns_point_group_measured_fraction_max 0.993
_diffrn_reflns_theta_full         26.000
_diffrn_reflns_theta_max          27.999
_diffrn_reflns_theta_min          2.874
_diffrn_ambient_temperature       100.0
_diffrn_detector                  'Bruker PHOTON 50 area detector'
_diffrn_detector_area_resol_mean  5.12
_diffrn_detector_type             'CMOS area detector'
_diffrn_measured_fraction_theta_full 0.996
_diffrn_measured_fraction_theta_max 0.993
_diffrn_measurement_device        'three-circle diffractometer'
_diffrn_measurement_device_type   'Bruker D8 QUEST Eco'
_diffrn_measurement_method        '\w and \f scans'
_diffrn_radiation_monochromator   'graphite'
_diffrn_radiation_probe           x-ray
_diffrn_radiation_type            MoK\a
_diffrn_radiation_wavelength      0.71073
_diffrn_source                    'sealed tube'
_diffrn_standards_number          0
_reflns_Friedel_coverage          0.000
_reflns_Friedel_fraction_full     .
_reflns_Friedel_fraction_max      .
_reflns_number_gt                 3815
_reflns_number_total              5454
_reflns_special_details
;
 Reflections were merged by SHELXL according to the crystal
 class for the calculation of statistics and refinement.
 
 _reflns_Friedel_fraction is defined as the number of unique
 Friedel pairs measured divided by the number that would be
 possible theoretically, ignoring centric projections and
 systematic absences.
;
_reflns_threshold_expression      'I > 2\s(I)'

_computing_cell_refinement        'SAINT v8.34A (Bruker, 2013)'
_computing_data_collection        'APEX 3 (Bruker, 2015) '
_computing_data_reduction         'SAINT v8.34A (Bruker, 2013)'
_computing_molecular_graphics     'XP (Bruker, 2008-2014)' 
_computing_publication_material   'Olex2 (Dolomanov et al., 2009)'
_computing_structure_refinement   'XL (Sheldrick, 2008)'
_computing_structure_solution     'XT (Sheldrick, 2015)'

_refine_diff_density_max          0.334
_refine_diff_density_min          -0.422
_refine_diff_density_rms          0.075
_refine_ls_extinction_coef        .
_refine_ls_extinction_method      none
_refine_ls_goodness_of_fit_ref    1.023
_refine_ls_hydrogen_treatment     constr
_refine_ls_matrix_type            full
_refine_ls_number_parameters      294
_refine_ls_number_reflns          5454
_refine_ls_number_restraints      0
_refine_ls_R_factor_all           0.0720
_refine_ls_R_factor_gt            0.0384
_refine_ls_restrained_S_all       1.023
_refine_ls_shift/su_max           0.001
_refine_ls_shift/su_mean          0.000
_refine_ls_structure_factor_coef  Fsqd
_refine_ls_weighting_details
'w=1/[\s^2^(Fo^2^)+(0.0295P)^2^+0.9846P] where P=(Fo^2^+2Fc^2^)/3'
_refine_ls_weighting_scheme       calc
_refine_ls_wR_factor_gt           0.0760
_refine_ls_wR_factor_ref          0.0873
_refine_special_details           ?
_olex2_refinement_description
;
1. Fixed Uiso
 At 1.2 times of:
  All C(H) groups
 At 1.5 times of:
  All C(H,H,H) groups
2.a Aromatic/amide H refined with riding coordinates:
 C3(H3), C4(H4), C5(H5), C12(H12), C13(H13), C14(H14), C23(H23), C24(H24),
 C25(H25)
2.b Idealised Me refined as rotating group:
 C16(H16A,H16B,H16C), C17(H17A,H17B,H17C), C27(H27A,H27B,H27C), C28(H28A,H28B,
 H28C), C31(H31A,H31B,H31C)
;
_atom_sites_solution_hydrogens    geom
_atom_sites_solution_primary      direct
_atom_sites_solution_secondary    ?
loop_
  _atom_site_label
  _atom_site_type_symbol
  _atom_site_fract_x
  _atom_site_fract_y
  _atom_site_fract_z
  _atom_site_U_iso_or_equiv
  _atom_site_adp_type
  _atom_site_occupancy
  _atom_site_site_symmetry_order
  _atom_site_calc_flag
  _atom_site_refinement_flags_posn
  _atom_site_refinement_flags_adp
  _atom_site_refinement_flags_occupancy
  _atom_site_disorder_assembly
  _atom_site_disorder_group
 C2 C 0.85157(15) 0.49045(19) 0.45392(13) 0.0139(4) Uani 1 1 d . . . . .
 C3 C 0.90676(16) 0.4479(2) 0.39135(14) 0.0166(5) Uani 1 1 d . . . . .
 H3 H 0.9040 0.4824 0.3306 0.020 Uiso 1 1 calc R . . . .
 C4 C 0.96638(16) 0.35358(19) 0.41906(14) 0.0166(5) Uani 1 1 d . . . . .
 H4 H 1.0045 0.3230 0.3768 0.020 Uiso 1 1 calc R . . . .
 C5 C 0.97073(17) 0.30335(19) 0.50863(14) 0.0165(5) Uani 1 1 d . . . . .
 H5 H 1.0126 0.2400 0.5286 0.020 Uiso 1 1 calc R . . . .
 C6 C 0.91272(16) 0.34810(18) 0.56734(14) 0.0143(4) Uani 1 1 d . . . . .
 C7 C 0.90213(17) 0.30716(19) 0.66554(14) 0.0163(5) Uani 1 1 d . . . . .
 C10 C 0.81521(16) 0.35477(18) 0.79126(13) 0.0137(4) Uani 1 1 d . . . . .
 C11 C 0.85358(17) 0.43146(19) 0.86483(15) 0.0178(5) Uani 1 1 d . . . . .
 C12 C 0.82048(19) 0.4246(2) 0.95072(15) 0.0228(5) Uani 1 1 d . . . . .
 H12 H 0.8449 0.4768 1.0009 0.027 Uiso 1 1 calc R . . . .
 C13 C 0.75285(18) 0.3431(2) 0.96383(15) 0.0238(5) Uani 1 1 d . . . . .
 H13 H 0.7297 0.3407 1.0221 0.029 Uiso 1 1 calc R . . . .
 C14 C 0.71869(17) 0.2648(2) 0.89219(15) 0.0194(5) Uani 1 1 d . . . . .
 H14 H 0.6737 0.2074 0.9025 0.023 Uiso 1 1 calc R . . . .
 C15 C 0.74935(16) 0.26912(19) 0.80524(14) 0.0157(5) Uani 1 1 d . . . . .
 C16 C 0.9278(2) 0.5192(2) 0.85125(17) 0.0307(6) Uani 1 1 d . . . . .
 H16A H 0.9762 0.4842 0.8188 0.046 Uiso 1 1 calc GR . . . .
 H16B H 0.9609 0.5486 0.9137 0.046 Uiso 1 1 calc GR . . . .
 H16C H 0.8951 0.5824 0.8123 0.046 Uiso 1 1 calc GR . . . .
 C17 C 0.71250(19) 0.1823(2) 0.72819(16) 0.0257(6) Uani 1 1 d . . . . .
 H17A H 0.6743 0.1236 0.7534 0.039 Uiso 1 1 calc GR . . . .
 H17B H 0.7683 0.1463 0.7075 0.039 Uiso 1 1 calc GR . . . .
 H17C H 0.6710 0.2205 0.6736 0.039 Uiso 1 1 calc GR . . . .
 C18 C 0.78202(17) 0.58956(19) 0.44066(14) 0.0170(5) Uani 1 1 d . . . . .
 C21 C 0.67167(17) 0.68939(19) 0.52226(14) 0.0158(5) Uani 1 1 d . . . . .
 C22 C 0.57448(17) 0.6682(2) 0.47658(15) 0.0194(5) Uani 1 1 d . . . . .
 C23 C 0.50289(19) 0.7455(2) 0.49054(17) 0.0258(5) Uani 1 1 d . . . . .
 H23 H 0.4365 0.7312 0.4617 0.031 Uiso 1 1 calc R . . . .
 C24 C 0.52608(19) 0.8430(2) 0.54543(18) 0.0291(6) Uani 1 1 d . . . . .
 H24 H 0.4760 0.8946 0.5542 0.035 Uiso 1 1 calc R . . . .
 C25 C 0.6229(2) 0.8649(2) 0.58755(18) 0.0278(6) Uani 1 1 d . . . . .
 H25 H 0.6390 0.9329 0.6237 0.033 Uiso 1 1 calc R . . . .
 C26 C 0.69703(18) 0.7882(2) 0.57751(15) 0.0199(5) Uani 1 1 d . . . . .
 C27 C 0.54960(19) 0.5650(2) 0.41330(17) 0.0282(6) Uani 1 1 d . . . . .
 H27A H 0.4783 0.5572 0.3951 0.042 Uiso 1 1 calc GR . . . .
 H27B H 0.5772 0.4963 0.4480 0.042 Uiso 1 1 calc GR . . . .
 H27C H 0.5771 0.5742 0.3557 0.042 Uiso 1 1 calc GR . . . .
 C28 C 0.80130(18) 0.8108(2) 0.62603(17) 0.0269(6) Uani 1 1 d . . . . .
 H28A H 0.8229 0.7519 0.6745 0.040 Uiso 1 1 calc GR . . . .
 H28B H 0.8058 0.8862 0.6567 0.040 Uiso 1 1 calc GR . . . .
 H28C H 0.8432 0.8091 0.5785 0.040 Uiso 1 1 calc GR . . . .
 C30 C 0.65855(17) 0.5942(2) 0.74705(15) 0.0185(5) Uani 1 1 d . . . . .
 C31 C 0.6036(2) 0.6496(3) 0.81051(19) 0.0372(7) Uani 1 1 d . . . . .
 H31A H 0.6375 0.7197 0.8364 0.056 Uiso 1 1 calc GR . . . .
 H31B H 0.5983 0.5977 0.8632 0.056 Uiso 1 1 calc GR . . . .
 H31C H 0.5380 0.6688 0.7749 0.056 Uiso 1 1 calc GR . . . .
 N1 N 0.85635(13) 0.43913(15) 0.53891(11) 0.0133(4) Uani 1 1 d . . . . .
 N9 N 0.83652(14) 0.37370(15) 0.69843(12) 0.0149(4) Uani 1 1 d . . . . .
 N20 N 0.74451(14) 0.60464(16) 0.51989(12) 0.0156(4) Uani 1 1 d . . . . .
 N29 N 0.70328(14) 0.55283(16) 0.69854(12) 0.0162(4) Uani 1 1 d . . . . .
 Ni1 Ni 0.78131(2) 0.49542(2) 0.61839(2) 0.01326(8) Uani 1 1 d . . . . .
 O8 O 0.94813(13) 0.22509(14) 0.70453(11) 0.0243(4) Uani 1 1 d . . . . .
 O19 O 0.76468(13) 0.64643(14) 0.36580(11) 0.0243(4) Uani 1 1 d . . . . .

loop_
  _atom_site_aniso_label
  _atom_site_aniso_U_11
  _atom_site_aniso_U_22
  _atom_site_aniso_U_33
  _atom_site_aniso_U_23
  _atom_site_aniso_U_13
  _atom_site_aniso_U_12
 C2 0.0141(10) 0.0151(11) 0.0133(8) -0.0006(8) 0.0045(8) -0.0038(10)
 C3 0.0165(12) 0.0215(12) 0.0125(9) -0.0001(8) 0.0042(9) -0.0038(10)
 C4 0.0147(11) 0.0212(12) 0.0156(9) -0.0047(8) 0.0073(9) -0.0034(10)
 C5 0.0168(11) 0.0149(11) 0.0187(10) -0.0026(8) 0.0054(9) 0.0005(9)
 C6 0.0149(11) 0.0127(11) 0.0155(9) -0.0004(8) 0.0034(8) -0.0019(9)
 C7 0.0185(12) 0.0161(12) 0.0150(9) 0.0005(8) 0.0052(9) 0.0000(10)
 C10 0.0153(11) 0.0139(11) 0.0131(9) 0.0029(8) 0.0059(8) 0.0052(9)
 C11 0.0197(12) 0.0158(12) 0.0177(10) 0.0018(8) 0.0031(9) 0.0020(10)
 C12 0.0280(14) 0.0257(13) 0.0142(10) -0.0038(9) 0.0028(9) 0.0044(11)
 C13 0.0270(14) 0.0327(14) 0.0143(9) 0.0040(9) 0.0106(10) 0.0076(12)
 C14 0.0158(11) 0.0236(12) 0.0200(10) 0.0076(9) 0.0068(9) 0.0012(10)
 C15 0.0153(11) 0.0159(11) 0.0159(9) 0.0021(8) 0.0031(8) 0.0038(9)
 C16 0.0373(15) 0.0267(15) 0.0262(11) -0.0006(10) 0.0017(11) -0.0113(12)
 C17 0.0267(14) 0.0273(14) 0.0226(11) -0.0018(9) 0.0040(10) -0.0087(12)
 C18 0.0172(12) 0.0187(12) 0.0161(10) 0.0009(8) 0.0061(9) -0.0003(10)
 C21 0.0174(12) 0.0170(11) 0.0152(9) 0.0065(8) 0.0084(9) 0.0034(10)
 C22 0.0181(12) 0.0231(13) 0.0183(10) 0.0100(9) 0.0070(9) 0.0024(10)
 C23 0.0160(11) 0.0340(14) 0.0284(12) 0.0159(11) 0.0071(10) 0.0046(12)
 C24 0.0260(14) 0.0251(14) 0.0410(14) 0.0132(11) 0.0183(12) 0.0126(12)
 C25 0.0327(15) 0.0198(13) 0.0354(13) 0.0022(10) 0.0178(12) 0.0029(11)
 C26 0.0233(13) 0.0189(12) 0.0200(10) 0.0050(8) 0.0101(10) 0.0010(10)
 C27 0.0242(14) 0.0363(16) 0.0248(11) -0.0016(11) 0.0067(11) -0.0071(12)
 C28 0.0284(15) 0.0225(13) 0.0305(12) -0.0058(10) 0.0077(11) -0.0012(11)
 C30 0.0170(12) 0.0214(12) 0.0182(10) -0.0039(9) 0.0058(9) -0.0021(10)
 C31 0.0327(16) 0.0453(18) 0.0394(14) -0.0244(13) 0.0209(13) -0.0044(14)
 N1 0.0139(9) 0.0154(10) 0.0118(7) 0.0002(7) 0.0054(7) -0.0007(8)
 N9 0.0185(10) 0.0138(9) 0.0143(8) 0.0029(7) 0.0074(7) 0.0031(8)
 N20 0.0183(10) 0.0159(10) 0.0141(8) 0.0022(7) 0.0067(7) 0.0030(8)
 N29 0.0189(10) 0.0153(10) 0.0148(8) 0.0036(7) 0.0047(8) 0.0022(8)
 Ni1 0.01605(14) 0.01415(14) 0.01136(11) 0.00182(11) 0.00700(9) 0.00255(13)
 O8 0.0308(10) 0.0237(9) 0.0212(7) 0.0074(7) 0.0118(7) 0.0119(8)
 O19 0.0277(10) 0.0286(10) 0.0189(7) 0.0102(7) 0.0105(7) 0.0076(8)

_geom_special_details
;
 All esds (except the esd in the dihedral angle between two l.s. planes)
 are estimated using the full covariance matrix.  The cell esds are taken
 into account individually in the estimation of esds in distances, angles
 and torsion angles; correlations between esds in cell parameters are only
 used when they are defined by crystal symmetry.  An approximate (isotropic)
 treatment of cell esds is used for estimating esds involving l.s. planes.
;
loop_
  _geom_bond_atom_site_label_1
  _geom_bond_atom_site_label_2
  _geom_bond_distance
  _geom_bond_site_symmetry_2
  _geom_bond_publ_flag
 C2 C3 1.383(3) . ?
 C2 C18 1.498(3) . ?
 C2 N1 1.343(2) . ?
 C3 H3 0.9500 . ?
 C3 C4 1.389(3) . ?
 C4 H4 0.9500 . ?
 C4 C5 1.397(3) . ?
 C5 H5 0.9500 . ?
 C5 C6 1.379(3) . ?
 C6 C7 1.516(3) . ?
 C6 N1 1.336(3) . ?
 C7 N9 1.354(3) . ?
 C7 O8 1.224(3) . ?
 C10 C11 1.402(3) . ?
 C10 C15 1.399(3) . ?
 C10 N9 1.432(2) . ?
 C11 C12 1.396(3) . ?
 C11 C16 1.497(3) . ?
 C12 H12 0.9500 . ?
 C12 C13 1.379(4) . ?
 C13 H13 0.9500 . ?
 C13 C14 1.383(3) . ?
 C14 H14 0.9500 . ?
 C14 C15 1.392(3) . ?
 C15 C17 1.509(3) . ?
 C16 H16A 0.9800 . ?
 C16 H16B 0.9800 . ?
 C16 H16C 0.9800 . ?
 C17 H17A 0.9800 . ?
 C17 H17B 0.9800 . ?
 C17 H17C 0.9800 . ?
 C18 N20 1.349(3) . ?
 C18 O19 1.240(2) . ?
 C21 C22 1.403(3) . ?
 C21 C26 1.403(3) . ?
 C21 N20 1.424(3) . ?
 C22 C23 1.390(3) . ?
 C22 C27 1.505(3) . ?
 C23 H23 0.9500 . ?
 C23 C24 1.383(4) . ?
 C24 H24 0.9500 . ?
 C24 C25 1.386(4) . ?
 C25 H25 0.9500 . ?
 C25 C26 1.397(3) . ?
 C26 C28 1.503(3) . ?
 C27 H27A 0.9800 . ?
 C27 H27B 0.9800 . ?
 C27 H27C 0.9800 . ?
 C28 H28A 0.9800 . ?
 C28 H28B 0.9800 . ?
 C28 H28C 0.9800 . ?
 C30 C31 1.450(3) . ?
 C30 N29 1.129(3) . ?
 C31 H31A 0.9800 . ?
 C31 H31B 0.9800 . ?
 C31 H31C 0.9800 . ?
 N1 Ni1 1.8132(17) . ?
 N9 Ni1 1.8887(17) . ?
 N20 Ni1 1.8918(17) . ?
 N29 Ni1 1.8545(18) . ?

loop_
  _geom_angle_atom_site_label_1
  _geom_angle_atom_site_label_2
  _geom_angle_atom_site_label_3
  _geom_angle
  _geom_angle_site_symmetry_1
  _geom_angle_site_symmetry_3
  _geom_angle_publ_flag
 C3 C2 C18 128.78(19) . . ?
 N1 C2 C3 119.3(2) . . ?
 N1 C2 C18 111.92(17) . . ?
 C2 C3 H3 120.7 . . ?
 C2 C3 C4 118.69(19) . . ?
 C4 C3 H3 120.7 . . ?
 C3 C4 H4 119.7 . . ?
 C3 C4 C5 120.5(2) . . ?
 C5 C4 H4 119.7 . . ?
 C4 C5 H5 120.9 . . ?
 C6 C5 C4 118.3(2) . . ?
 C6 C5 H5 120.9 . . ?
 C5 C6 C7 128.3(2) . . ?
 N1 C6 C5 119.88(19) . . ?
 N1 C6 C7 111.82(18) . . ?
 N9 C7 C6 109.68(18) . . ?
 O8 C7 C6 121.9(2) . . ?
 O8 C7 N9 128.41(19) . . ?
 C11 C10 N9 118.37(19) . . ?
 C15 C10 C11 120.87(19) . . ?
 C15 C10 N9 120.41(18) . . ?
 C10 C11 C16 120.7(2) . . ?
 C12 C11 C10 118.5(2) . . ?
 C12 C11 C16 120.8(2) . . ?
 C11 C12 H12 119.5 . . ?
 C13 C12 C11 120.9(2) . . ?
 C13 C12 H12 119.5 . . ?
 C12 C13 H13 120.0 . . ?
 C12 C13 C14 120.0(2) . . ?
 C14 C13 H13 120.0 . . ?
 C13 C14 H14 119.6 . . ?
 C13 C14 C15 120.9(2) . . ?
 C15 C14 H14 119.6 . . ?
 C10 C15 C17 120.97(19) . . ?
 C14 C15 C10 118.7(2) . . ?
 C14 C15 C17 120.3(2) . . ?
 C11 C16 H16A 109.5 . . ?
 C11 C16 H16B 109.5 . . ?
 C11 C16 H16C 109.5 . . ?
 H16A C16 H16B 109.5 . . ?
 H16A C16 H16C 109.5 . . ?
 H16B C16 H16C 109.5 . . ?
 C15 C17 H17A 109.5 . . ?
 C15 C17 H17B 109.5 . . ?
 C15 C17 H17C 109.5 . . ?
 H17A C17 H17B 109.5 . . ?
 H17A C17 H17C 109.5 . . ?
 H17B C17 H17C 109.5 . . ?
 N20 C18 C2 110.17(18) . . ?
 O19 C18 C2 122.19(19) . . ?
 O19 C18 N20 127.6(2) . . ?
 C22 C21 C26 121.2(2) . . ?
 C22 C21 N20 119.6(2) . . ?
 C26 C21 N20 119.0(2) . . ?
 C21 C22 C27 120.3(2) . . ?
 C23 C22 C21 118.2(2) . . ?
 C23 C22 C27 121.4(2) . . ?
 C22 C23 H23 119.2 . . ?
 C24 C23 C22 121.6(3) . . ?
 C24 C23 H23 119.2 . . ?
 C23 C24 H24 120.2 . . ?
 C23 C24 C25 119.6(2) . . ?
 C25 C24 H24 120.2 . . ?
 C24 C25 H25 119.6 . . ?
 C24 C25 C26 120.9(2) . . ?
 C26 C25 H25 119.6 . . ?
 C21 C26 C28 121.0(2) . . ?
 C25 C26 C21 118.5(2) . . ?
 C25 C26 C28 120.5(2) . . ?
 C22 C27 H27A 109.5 . . ?
 C22 C27 H27B 109.5 . . ?
 C22 C27 H27C 109.5 . . ?
 H27A C27 H27B 109.5 . . ?
 H27A C27 H27C 109.5 . . ?
 H27B C27 H27C 109.5 . . ?
 C26 C28 H28A 109.5 . . ?
 C26 C28 H28B 109.5 . . ?
 C26 C28 H28C 109.5 . . ?
 H28A C28 H28B 109.5 . . ?
 H28A C28 H28C 109.5 . . ?
 H28B C28 H28C 109.5 . . ?
 N29 C30 C31 178.2(3) . . ?
 C30 C31 H31A 109.5 . . ?
 C30 C31 H31B 109.5 . . ?
 C30 C31 H31C 109.5 . . ?
 H31A C31 H31B 109.5 . . ?
 H31A C31 H31C 109.5 . . ?
 H31B C31 H31C 109.5 . . ?
 C2 N1 Ni1 118.19(15) . . ?
 C6 N1 C2 123.34(18) . . ?
 C6 N1 Ni1 118.47(14) . . ?
 C7 N9 C10 120.77(17) . . ?
 C7 N9 Ni1 116.40(13) . . ?
 C10 N9 Ni1 122.75(14) . . ?
 C18 N20 C21 120.59(17) . . ?
 C18 N20 Ni1 116.21(15) . . ?
 C21 N20 Ni1 122.70(13) . . ?
 C30 N29 Ni1 175.7(2) . . ?
 N1 Ni1 N9 83.62(8) . . ?
 N1 Ni1 N20 83.37(8) . . ?
 N1 Ni1 N29 179.33(8) . . ?
 N9 Ni1 N20 166.98(8) . . ?
 N29 Ni1 N9 96.77(7) . . ?
 N29 Ni1 N20 96.25(8) . . ?

loop_
  _geom_hbond_atom_site_label_D
  _geom_hbond_atom_site_label_H
  _geom_hbond_atom_site_label_A
  _geom_hbond_distance_DH
  _geom_hbond_distance_HA
  _geom_hbond_distance_DA
  _geom_hbond_angle_DHA
  _geom_hbond_site_symmetry_A
 C31 H31A O19 0.98 2.34 3.261(3) 157 4_576

loop_
  _geom_torsion_atom_site_label_1
  _geom_torsion_atom_site_label_2
  _geom_torsion_atom_site_label_3
  _geom_torsion_atom_site_label_4
  _geom_torsion
  _geom_torsion_site_symmetry_1
  _geom_torsion_site_symmetry_2
  _geom_torsion_site_symmetry_3
  _geom_torsion_site_symmetry_4
  _geom_torsion_publ_flag
 C2 C3 C4 C5 -0.3(3) . . . . ?
 C2 C18 N20 C21 -176.01(19) . . . . ?
 C2 C18 N20 Ni1 -3.9(2) . . . . ?
 C2 N1 Ni1 N9 178.49(17) . . . . ?
 C2 N1 Ni1 N20 -1.91(16) . . . . ?
 C3 C2 C18 N20 -178.6(2) . . . . ?
 C3 C2 C18 O19 1.2(4) . . . . ?
 C3 C2 N1 C6 0.4(3) . . . . ?
 C3 C2 N1 Ni1 -178.86(16) . . . . ?
 C3 C4 C5 C6 1.5(3) . . . . ?
 C4 C5 C6 C7 178.1(2) . . . . ?
 C4 C5 C6 N1 -1.8(3) . . . . ?
 C5 C6 C7 N9 -179.1(2) . . . . ?
 C5 C6 C7 O8 0.6(4) . . . . ?
 C5 C6 N1 C2 0.8(3) . . . . ?
 C5 C6 N1 Ni1 -179.91(16) . . . . ?
 C6 C7 N9 C10 -178.27(18) . . . . ?
 C6 C7 N9 Ni1 -1.4(2) . . . . ?
 C6 N1 Ni1 N9 -0.80(16) . . . . ?
 C6 N1 Ni1 N20 178.80(17) . . . . ?
 C7 C6 N1 C2 -179.03(19) . . . . ?
 C7 C6 N1 Ni1 0.2(2) . . . . ?
 C7 N9 Ni1 N1 1.28(16) . . . . ?
 C7 N9 Ni1 N20 -0.5(5) . . . . ?
 C7 N9 Ni1 N29 -179.28(16) . . . . ?
 C10 C11 C12 C13 1.1(3) . . . . ?
 C10 N9 Ni1 N1 178.08(18) . . . . ?
 C10 N9 Ni1 N20 176.3(3) . . . . ?
 C10 N9 Ni1 N29 -2.48(18) . . . . ?
 C11 C10 C15 C14 3.1(3) . . . . ?
 C11 C10 C15 C17 -176.4(2) . . . . ?
 C11 C10 N9 C7 105.4(2) . . . . ?
 C11 C10 N9 Ni1 -71.3(2) . . . . ?
 C11 C12 C13 C14 1.6(4) . . . . ?
 C12 C13 C14 C15 -2.0(4) . . . . ?
 C13 C14 C15 C10 -0.4(3) . . . . ?
 C13 C14 C15 C17 179.2(2) . . . . ?
 C15 C10 C11 C12 -3.5(3) . . . . ?
 C15 C10 C11 C16 176.9(2) . . . . ?
 C15 C10 N9 C7 -81.3(3) . . . . ?
 C15 C10 N9 Ni1 102.1(2) . . . . ?
 C16 C11 C12 C13 -179.3(2) . . . . ?
 C18 C2 C3 C4 -179.6(2) . . . . ?
 C18 C2 N1 C6 179.51(19) . . . . ?
 C18 C2 N1 Ni1 0.3(2) . . . . ?
 C18 N20 Ni1 N1 3.39(16) . . . . ?
 C18 N20 Ni1 N9 5.2(5) . . . . ?
 C18 N20 Ni1 N29 -176.05(16) . . . . ?
 C21 C22 C23 C24 1.9(3) . . . . ?
 C21 N20 Ni1 N1 175.28(18) . . . . ?
 C21 N20 Ni1 N9 177.1(3) . . . . ?
 C21 N20 Ni1 N29 -4.16(19) . . . . ?
 C22 C21 C26 C25 1.0(3) . . . . ?
 C22 C21 C26 C28 -179.8(2) . . . . ?
 C22 C21 N20 C18 77.4(3) . . . . ?
 C22 C21 N20 Ni1 -94.1(2) . . . . ?
 C22 C23 C24 C25 0.2(3) . . . . ?
 C23 C24 C25 C26 -1.8(4) . . . . ?
 C24 C25 C26 C21 1.2(3) . . . . ?
 C24 C25 C26 C28 -178.0(2) . . . . ?
 C26 C21 C22 C23 -2.5(3) . . . . ?
 C26 C21 C22 C27 176.67(19) . . . . ?
 C26 C21 N20 C18 -108.2(2) . . . . ?
 C26 C21 N20 Ni1 80.2(2) . . . . ?
 C27 C22 C23 C24 -177.3(2) . . . . ?
 N1 C2 C3 C4 -0.6(3) . . . . ?
 N1 C2 C18 N20 2.4(3) . . . . ?
 N1 C2 C18 O19 -177.8(2) . . . . ?
 N1 C6 C7 N9 0.8(3) . . . . ?
 N1 C6 C7 O8 -179.6(2) . . . . ?
 N9 C10 C11 C12 169.8(2) . . . . ?
 N9 C10 C11 C16 -9.8(3) . . . . ?
 N9 C10 C15 C14 -170.02(19) . . . . ?
 N9 C10 C15 C17 10.4(3) . . . . ?
 N20 C21 C22 C23 171.70(18) . . . . ?
 N20 C21 C22 C27 -9.1(3) . . . . ?
 N20 C21 C26 C25 -173.26(19) . . . . ?
 N20 C21 C26 C28 6.0(3) . . . . ?
 O8 C7 N9 C10 2.1(4) . . . . ?
 O8 C7 N9 Ni1 179.0(2) . . . . ?
 O19 C18 N20 C21 4.1(4) . . . . ?
 O19 C18 N20 Ni1 176.2(2) . . . . ?

_shelx_res_file
;
    tcd487.res created by SHELXL-2014/7

TITL TCD487 in P2(1)/c
CELL 0.71073 13.9373 11.6859 14.2687 90 101.5569 90
ZERR 4 0.001 0.0008 0.0009 0 0.0017 0
LATT 1
SYMM -X,0.5+Y,0.5-Z
SFAC C H N Ni O
UNIT 100 96 16 4 8
EQIV $1 +X,1.5-Y,0.5+Z

L.S. 10
PLAN  20
SIZE 0.11 0.13 0.22
TEMP -173.15
HTAB C31 O19_$1
BOND $H
MORE -1
CONF
WPDB -2
HTAB
fmap 2
acta 52
OMIT 0 3 5
REM <olex2.extras>
REM <HklSrc "%.\\TCD487y.hkl">
REM </olex2.extras>

WGHT    0.029500    0.984600
FVAR       0.13755
C2    1    0.851572    0.490454    0.453922    11.00000    0.01411    0.01514 =
         0.01331   -0.00058    0.00451   -0.00384
C3    1    0.906762    0.447884    0.391350    11.00000    0.01648    0.02148 =
         0.01246   -0.00010    0.00416   -0.00380
AFIX  43
H3    2    0.903968    0.482446    0.330599    11.00000   -1.20000
AFIX   0
C4    1    0.966381    0.353576    0.419063    11.00000    0.01475    0.02116 =
         0.01558   -0.00467    0.00730   -0.00344
AFIX  43
H4    2    1.004493    0.323011    0.376762    11.00000   -1.20000
AFIX   0
C5    1    0.970726    0.303351    0.508626    11.00000    0.01680    0.01492 =
         0.01866   -0.00261    0.00544    0.00054
AFIX  43
H5    2    1.012563    0.240002    0.528569    11.00000   -1.20000
AFIX   0
C6    1    0.912719    0.348101    0.567340    11.00000    0.01489    0.01275 =
         0.01554   -0.00040    0.00336   -0.00194
C7    1    0.902130    0.307155    0.665543    11.00000    0.01852    0.01608 =
         0.01502    0.00045    0.00516    0.00004
C10   1    0.815210    0.354766    0.791256    11.00000    0.01534    0.01393 =
         0.01313    0.00287    0.00592    0.00523
C11   1    0.853581    0.431456    0.864828    11.00000    0.01973    0.01582 =
         0.01772    0.00182    0.00313    0.00202
C12   1    0.820481    0.424596    0.950721    11.00000    0.02798    0.02566 =
         0.01423   -0.00380    0.00276    0.00437
AFIX  43
H12   2    0.844886    0.476820    1.000863    11.00000   -1.20000
AFIX   0
C13   1    0.752846    0.343075    0.963827    11.00000    0.02698    0.03268 =
         0.01429    0.00401    0.01057    0.00758
AFIX  43
H13   2    0.729716    0.340665    1.022062    11.00000   -1.20000
AFIX   0
C14   1    0.718693    0.264831    0.892187    11.00000    0.01578    0.02359 =
         0.02003    0.00759    0.00681    0.00119
AFIX  43
H14   2    0.673693    0.207376    0.902467    11.00000   -1.20000
AFIX   0
C15   1    0.749355    0.269124    0.805242    11.00000    0.01530    0.01591 =
         0.01594    0.00208    0.00311    0.00382
C16   1    0.927841    0.519232    0.851251    11.00000    0.03728    0.02665 =
         0.02622   -0.00057    0.00167   -0.01133
AFIX 137
H16A  2    0.976189    0.484195    0.818843    11.00000   -1.50000
H16B  2    0.960891    0.548600    0.913740    11.00000   -1.50000
H16C  2    0.895054    0.582362    0.812284    11.00000   -1.50000
AFIX   0
C17   1    0.712498    0.182269    0.728186    11.00000    0.02674    0.02726 =
         0.02263   -0.00182    0.00399   -0.00872
AFIX 137
H17A  2    0.674292    0.123601    0.753447    11.00000   -1.50000
H17B  2    0.768281    0.146314    0.707472    11.00000   -1.50000
H17C  2    0.670984    0.220479    0.673591    11.00000   -1.50000
AFIX   0
C18   1    0.782022    0.589561    0.440663    11.00000    0.01721    0.01873 =
         0.01611    0.00087    0.00614   -0.00029
C21   1    0.671667    0.689386    0.522259    11.00000    0.01739    0.01705 =
         0.01520    0.00648    0.00839    0.00342
C22   1    0.574478    0.668211    0.476582    11.00000    0.01808    0.02314 =
         0.01831    0.00999    0.00698    0.00236
C23   1    0.502892    0.745550    0.490542    11.00000    0.01596    0.03397 =
         0.02844    0.01586    0.00706    0.00455
AFIX  43
H23   2    0.436452    0.731152    0.461690    11.00000   -1.20000
AFIX   0
C24   1    0.526079    0.842963    0.545434    11.00000    0.02600    0.02513 =
         0.04096    0.01321    0.01831    0.01265
AFIX  43
H24   2    0.475968    0.894579    0.554232    11.00000   -1.20000
AFIX   0
C25   1    0.622876    0.864852    0.587545    11.00000    0.03269    0.01982 =
         0.03544    0.00216    0.01780    0.00285
AFIX  43
H25   2    0.638980    0.932898    0.623707    11.00000   -1.20000
AFIX   0
C26   1    0.697032    0.788195    0.577514    11.00000    0.02327    0.01894 =
         0.01999    0.00502    0.01010    0.00100
C27   1    0.549599    0.565003    0.413304    11.00000    0.02415    0.03626 =
         0.02484   -0.00162    0.00665   -0.00707
AFIX 137
H27A  2    0.478280    0.557221    0.395052    11.00000   -1.50000
H27B  2    0.577236    0.496344    0.447967    11.00000   -1.50000
H27C  2    0.577079    0.574232    0.355686    11.00000   -1.50000
AFIX   0
C28   1    0.801298    0.810815    0.626034    11.00000    0.02844    0.02253 =
         0.03049   -0.00580    0.00766   -0.00117
AFIX 137
H28A  2    0.822871    0.751880    0.674541    11.00000   -1.50000
H28B  2    0.805800    0.886202    0.656693    11.00000   -1.50000
H28C  2    0.843226    0.809118    0.578512    11.00000   -1.50000
AFIX   0
C30   1    0.658545    0.594178    0.747053    11.00000    0.01701    0.02141 =
         0.01817   -0.00387    0.00583   -0.00206
C31   1    0.603624    0.649581    0.810509    11.00000    0.03265    0.04531 =
         0.03939   -0.02439    0.02088   -0.00443
AFIX 137
H31A  2    0.637517    0.719677    0.836364    11.00000   -1.50000
H31B  2    0.598286    0.597699    0.863182    11.00000   -1.50000
H31C  2    0.537951    0.668810    0.774867    11.00000   -1.50000
AFIX   0
N1    3    0.856353    0.439127    0.538912    11.00000    0.01385    0.01538 =
         0.01182    0.00018    0.00542   -0.00072
N9    3    0.836519    0.373701    0.698427    11.00000    0.01847    0.01375 =
         0.01432    0.00290    0.00740    0.00306
N20   3    0.744512    0.604637    0.519887    11.00000    0.01830    0.01593 =
         0.01411    0.00224    0.00669    0.00296
N29   3    0.703278    0.552832    0.698540    11.00000    0.01893    0.01528 =
         0.01483    0.00360    0.00470    0.00224
NI1   4    0.781311    0.495415    0.618391    11.00000    0.01605    0.01415 =
         0.01136    0.00182    0.00700    0.00255
O8    5    0.948127    0.225091    0.704529    11.00000    0.03081    0.02366 =
         0.02116    0.00736    0.01177    0.01185
O19   5    0.764675    0.646426    0.365800    11.00000    0.02769    0.02860 =
         0.01893    0.01021    0.01046    0.00759
HKLF 4

REM  TCD487 in P2(1)/c
REM R1 =  0.0384 for    3815 Fo > 4sig(Fo)  and  0.0720 for all    5454 data
REM    294 parameters refined using      0 restraints

END

WGHT      0.0295      0.9845

REM Instructions for potential hydrogen bonds
HTAB C31 O19_$1

REM Highest difference peak  0.334,  deepest hole -0.422,  1-sigma level  0.075
Q1    1   0.6562  1.0037  0.6464  11.00000  0.05    0.33
Q2    1   0.8147  0.5425  0.4435  11.00000  0.05    0.32
Q3    1   0.5829  0.3001  0.7148  11.00000  0.05    0.30
Q4    1   0.8399  0.3834  0.8334  11.00000  0.05    0.30
Q5    1   0.7406  0.2665  0.8519  11.00000  0.05    0.29
Q6    1   0.6808  0.5211  0.5039  11.00000  0.05    0.28
Q7    1   0.9019  0.5766  0.6759  11.00000  0.05    0.28
Q8    1   0.6190  0.6756  0.4949  11.00000  0.05    0.27
Q9    1   0.7400  0.6010  0.7191  11.00000  0.05    0.27
Q10   1   0.6963  0.4979  0.5778  11.00000  0.05    0.27
Q11   1   0.7422  0.5614  0.5504  11.00000  0.05    0.27
Q12   1   0.7960  0.2830  0.8211  11.00000  0.05    0.27
Q13   1   0.7151  0.5592  0.8295  11.00000  0.05    0.27
Q14   1   0.9331  0.6484  0.3187  11.00000  0.05    0.27
Q15   1   0.7844  0.5965  0.8863  11.00000  0.05    0.27
Q16   1   0.8944  0.3955  0.5494  11.00000  0.05    0.27
Q17   1   0.6827  0.7171  0.5659  11.00000  0.05    0.26
Q18   1   0.6956  0.7432  0.5442  11.00000  0.05    0.26
Q19   1   0.4671  0.7340  0.4825  11.00000  0.05    0.25
Q20   1   0.8400  0.4112  0.9075  11.00000  0.05    0.25
;
_shelx_res_checksum               59572
_shelx_hkl_file
;
   2   0   0  735.46   24.17
  -3   0   0  182.42    5.83
  -4   0   0  208.01    6.67
  -5   0   0   33.07    1.38
  -6   0   0   24.28    1.20
  -7   0   0   73.98    2.68
  -8   0   0    2.94    0.69
   9   0   0   17.97    1.16
  -9   0   0   15.50    1.22
 -10   0   0   -0.46    0.77
  10   0   0    0.88    0.69
  11   0   0   41.89    1.94
 -11   0   0   41.69    2.05
 -12   0   0    4.13    1.04
  12   0   0    2.81    0.84
  13   0   0   22.14    1.53
 -13   0   0   18.64    1.73
 -14   0   0   17.54    1.79
  14   0   0   17.27    1.54
 -15   0   0   15.06    1.59
  15   0   0   16.02    1.54
 -16   0   0   38.58    2.51
 -17   0   0   12.61    1.71
  -2  -1   0  587.74   17.99
  -2   1   0  559.29   17.92
  -2   1   0  566.05   17.92
  -3  -1   0    5.72    0.49
  -3   1   0    4.64    0.47
  -3   1   0    4.99    0.47
  -4  -1   0  115.53    3.58
   4  -1   0   92.76    3.51
  -4   1   0  114.35    3.56
   5  -1   0   18.62    0.97
  -5  -1   0   18.43    1.01
  -5   1   0   17.92    0.98
  -6  -1   0   -0.11    0.54
   6  -1   0   -0.10    0.45
  -6   1   0   -0.44    0.51
   7  -1   0    0.32    0.50
  -7  -1   0   -0.45    0.56
  -7   1   0    0.01    0.58
  -8  -1   0   53.93    2.15
   8  -1   0   53.04    2.06
  -8   1   0   54.04    2.13
   9  -1   0    4.61    0.69
  -9  -1   0    5.01    0.80
  -9   1   0    2.87    0.76
 -10  -1   0    8.36    0.99
  10  -1   0    9.92    1.02
 -10   1   0    9.20    0.98
 -11  -1   0    3.01    0.93
  11  -1   0    0.85    0.69
 -11   1   0    0.84    0.91
 -12  -1   0   11.84    1.27
  12  -1   0   11.82    1.20
 -12   1   0    9.99    1.23
  13  -1   0   -0.27    0.79
 -13  -1   0    2.54    1.08
 -13   1   0    0.42    0.99
  13   1   0    0.25    0.85
  14  -1   0    1.31    0.88
 -14  -1   0    0.32    1.14
  14   1   0    1.66    0.96
 -14   1   0    0.88    1.14
  15  -1   0    0.43    0.97
 -15  -1   0   -1.32    1.18
 -15   1   0   -0.44    1.21
  15   1   0    1.40    1.02
 -16  -1   0    1.17    1.32
  16   1   0   -0.22    0.97
 -16   1   0   -0.85    1.22
 -17  -1   0    0.56    1.39
 -17   1   0    1.32    1.30
   0   2   0    6.25    0.46
   0   2   0    6.57    0.50
  -1   2   0   69.45    2.27
   1   2   0   67.12    2.29
   1   2   0   72.08    2.31
  -1   2   0   68.98    2.28
  -2  -2   0  156.22    4.96
  -2   2   0  153.90    4.94
  -2   2   0  152.96    4.95
  -3  -2   0  316.59    9.90
  -3   2   0  310.13    9.88
  -3   2   0  308.90    9.87
  -4  -2   0   26.38    1.19
  -4   2   0   26.63    1.14
  -5  -2   0  111.87    3.80
  -5   2   0  114.22    3.78
  -6  -2   0    5.09    0.67
  -6   2   0    3.73    0.63
  -7  -2   0   40.10    1.73
   7  -2   0   38.81    1.58
  -7   2   0   42.16    1.71
   8  -2   0    0.17    0.53
  -8  -2   0    0.09    0.62
  -8   2   0   -0.50    0.61
   9  -2   0   99.33    3.46
  -9  -2   0   96.29    3.55
  -9   2   0  100.18    3.56
 -10  -2   0    0.75    0.82
  10  -2   0    0.26    0.64
 -10   2   0    0.35    0.79
  11  -2   0   22.29    1.44
 -11  -2   0   22.76    1.63
 -11   2   0   22.87    1.74
  12  -2   0   19.63    1.36
 -12  -2   0   17.79    1.63
 -12   2   0   19.76    1.65
 -13  -2   0   51.55    2.58
  13  -2   0   52.72    2.41
 -13   2   0   56.01    2.58
  14  -2   0   51.84    2.34
 -14  -2   0   53.25    2.68
 -14   2   0   54.26    2.67
  15  -2   0    1.09    0.96
 -15  -2   0    0.57    1.14
  15   2   0   -0.20    1.11
 -15   2   0    0.34    1.15
 -16  -2   0   26.32    2.17
  16   2   0   28.25    2.03
 -16   2   0   29.30    2.47
 -17  -2   0    4.86    1.45
 -17   2   0    2.95    1.40
   0   3   0    0.22    0.38
   0   3   0   -0.79    0.36
  -1   3   0   23.30    0.99
  -1   3   0   24.52    0.99
   1   3   0   24.08    1.02
  -2  -3   0  237.80    7.51
  -2   3   0  231.95    7.49
  -2   3   0  235.67    7.48
  -3  -3   0   13.09    0.84
  -3   3   0   12.39    0.76
  -3   3   0   13.54    0.78
  -4  -3   0   97.99    3.35
  -4   3   0   99.18    3.32
  -4   3   0   99.87    3.32
  -5  -3   0  227.89    7.41
  -5   3   0  229.76    7.38
  -6  -3   0    5.75    0.70
  -6   3   0    5.45    0.71
  -7  -3   0   21.65    1.26
  -7   3   0   22.34    1.21
  -8  -3   0    2.76    0.70
   8  -3   0   -0.05    0.57
  -8   3   0    1.34    0.68
  -9  -3   0    2.33    0.81
  -9   3   0    3.97    0.82
 -10  -3   0    0.27    0.80
  10  -3   0    0.50    0.39
 -10   3   0   -0.18    0.79
 -11  -3   0   -0.05    0.80
  11  -3   0    0.10    0.50
 -11   3   0   -0.96    0.87
 -12  -3   0    4.71    1.10
 -12   3   0    4.59    1.07
  13  -3   0    1.12    0.81
 -13  -3   0    2.73    1.16
 -13   3   0    2.64    1.08
 -14  -3   0    2.69    1.23
 -14   3   0    0.93    1.13
 -15  -3   0    3.71    1.32
 -15   3   0    2.61    1.24
 -16  -3   0    2.00    1.29
 -16   3   0    2.46    1.34
 -17  -3   0   -0.49    1.46
 -17   3   0    0.12    1.36
   0   4   0   17.55    0.90
   0   4   0   17.46    0.89
   1   4   0   41.49    1.61
  -1   4   0   43.80    1.59
  -1   4   0   42.83    1.58
  -2  -4   0   13.76    0.82
  -2   4   0   14.91    0.81
  -2   4   0   13.58    0.81
  -3  -4   0    5.50    0.59
  -3   4   0    5.52    0.55
  -3   4   0    4.76    0.54
  -4  -4   0   74.25    2.71
  -4   4   0   78.11    2.71
  -4   4   0   78.88    2.71
  -5  -4   0    1.69    0.59
  -5   4   0    1.58    0.55
  -6  -4   0    5.22    0.69
  -6   4   0    4.84    0.65
  -7  -4   0   37.58    1.67
  -7   4   0   36.72    1.70
  -8  -4   0    2.82    0.78
  -8   4   0    3.55    0.73
  -9  -4   0   26.27    1.56
  -9   4   0   27.70    1.54
 -10  -4   0   16.58    1.43
 -10   4   0   15.62    1.38
 -11  -4   0   52.92    2.43
 -11   4   0   52.96    2.40
 -12  -4   0   30.14    1.94
 -12   4   0   31.18    1.92
  13  -4   0    3.58    1.76
 -13  -4   0    3.64    1.21
 -13   4   0    4.86    1.17
 -14  -4   0   58.40    2.91
 -14   4   0   59.92    2.84
 -15  -4   0    0.75    1.26
 -15   4   0    2.91    1.24
 -16  -4   0    7.19    1.42
 -16   4   0    6.98    1.49
 -17  -4   0    2.00    1.40
 -17   4   0    3.51    1.45
   0   5   0    0.14    0.49
  -1   5   0   29.70    1.37
  -1   5   0   27.29    1.24
   1   5   0   28.60    1.27
  -2  -5   0   -0.27    0.41
   2  -5   0    0.33    0.48
  -2   5   0   -0.51    0.50
  -2   5   0   -0.01    0.46
   2   5   0   -0.36    0.48
   3  -5   0    2.90    0.48
  -3  -5   0    3.43    0.56
  -3   5   0    2.94    0.55
  -3   5   0    3.00    0.55
   4  -5   0   42.97    1.61
  -4  -5   0   41.13    1.70
  -4   5   0   41.85    1.67
  -5  -5   0    0.96    0.58
   5  -5   0    0.18    0.51
  -5   5   0   -0.32    0.52
  -6  -5   0    2.82    0.67
   6  -5   0    2.36    0.54
  -6   5   0    2.06    0.63
  -7  -5   0   25.36    1.41
   7  -5   0   25.16    1.26
  -7   5   0   27.61    1.39
   8  -5   0   -0.39    0.72
  -8  -5   0   -0.08    0.70
  -8   5   0    0.56    0.71
  -9  -5   0   17.34    1.39
   9  -5   0   17.30    1.17
  -9   5   0   16.10    1.33
 -10  -5   0    2.71    0.94
 -10   5   0    4.13    0.94
 -11  -5   0    2.15    0.99
 -11   5   0    0.85    1.03
 -12  -5   0   14.01    1.39
 -12   5   0   13.97    1.56
 -13  -5   0    2.60    1.18
 -13   5   0    0.97    1.03
 -14  -5   0    1.61    1.21
 -14   5   0    1.13    1.30
 -15  -5   0    0.89    1.15
 -15   5   0    1.49    1.22
 -16  -5   0    0.10    1.27
 -16   5   0   -1.70    1.29
   0   6   0  144.27    4.80
  -1   6   0   13.76    0.94
   1   6   0   12.93    0.97
  -2  -6   0   37.08    1.50
   2  -6   0   38.69    1.49
  -2   6   0   37.33    1.56
   2   6   0   36.99    1.60
   3  -6   0   16.66    1.09
  -3  -6   0   15.44    1.07
  -3   6   0   15.51    1.00
  -4  -6   0   24.21    1.26
  -4   6   0   24.96    1.33
  -5  -6   0  101.97    3.58
  -5   6   0  102.67    3.57
  -6  -6   0   41.08    1.83
  -6   6   0   43.04    1.87
  -7  -6   0   73.90    2.84
  -7   6   0   76.39    2.83
  -8  -6   0    0.97    0.78
  -8   6   0    0.07    0.73
  -9  -6   0   57.35    2.46
  -9   6   0   58.78    2.45
 -10  -6   0   19.90    1.63
 -10   6   0   21.24    1.55
 -11  -6   0   23.69    1.90
 -11   6   0   19.11    1.63
 -12  -6   0    7.98    1.26
 -12   6   0    7.24    1.22
 -13  -6   0   12.29    1.47
 -13   6   0    9.98    1.34
 -14  -6   0    4.69    1.45
 -14   6   0    6.19    1.32
 -15  -6   0   -0.37    1.27
 -15   6   0    1.20    1.25
 -16  -6   0   14.57    1.73
 -16   6   0   16.29    1.78
   0   7   0    0.70    0.60
   1  -7   0    7.92    0.88
   1   7   0    7.11    0.77
  -1   7   0    6.62    0.74
   2  -7   0   14.22    1.14
  -2   7   0   15.44    1.05
   2   7   0   15.79    1.10
  -3  -7   0    3.37    0.65
  -3   7   0    2.04    0.64
  -4  -7   0    0.27    0.59
  -4   7   0    0.21    0.60
  -5  -7   0   -0.45    0.61
  -5   7   0    0.04    0.64
  -6  -7   0    1.71    0.70
  -6   7   0    2.24    0.73
  -7  -7   0   22.93    1.40
  -7   7   0   19.87    1.39
  -8  -7   0    8.85    0.99
  -8   7   0    7.84    1.07
  -9  -7   0    7.68    1.05
  -9   7   0    7.53    1.02
 -10  -7   0    1.78    1.07
 -10   7   0    3.00    1.07
 -11  -7   0    0.35    0.99
 -11   7   0    1.63    1.00
 -12  -7   0    0.12    1.02
 -12   7   0    0.27    1.11
 -13  -7   0    0.36    1.13
 -13   7   0    1.37    1.12
 -14  -7   0    4.48    1.46
 -14   7   0    4.87    1.30
 -15  -7   0    4.28    1.47
 -15   7   0    2.83    1.36
 -16  -7   0   -0.18    1.63
   0  -8   0   31.04    1.79
   0   8   0   28.19    1.49
   1  -8   0    0.67    0.59
  -1   8   0    0.98    0.63
   1   8   0    0.53    0.70
   2   8   0   52.96    2.13
  -2   8   0   41.66    1.94
  -3  -8   0   26.02    1.32
  -3   8   0   26.61    1.52
  -4  -8   0   61.26    2.41
  -4   8   0   62.18    2.51
  -5  -8   0   76.53    2.93
  -5   8   0   79.74    2.97
  -6  -8   0   11.36    1.17
  -6   8   0   12.74    1.23
  -7  -8   0   84.20    3.31
  -7   8   0   87.54    3.28
  -8  -8   0   12.12    1.30
  -8   8   0   11.73    1.26
  -9  -8   0    2.86    0.95
  -9   8   0    3.21    0.98
 -10  -8   0   -0.72    0.92
 -10   8   0    0.42    0.94
 -11  -8   0   19.25    1.72
 -11   8   0   19.31    1.88
 -12  -8   0    2.16    1.20
 -12   8   0    0.82    1.10
 -13  -8   0    4.67    1.35
 -13   8   0    5.62    1.28
 -14  -8   0    7.11    1.51
 -14   8   0    6.68    1.52
 -15  -8   0    0.21    1.49
 -15   8   0    0.94    1.30
   0  -9   0   -0.87    0.61
   0   9   0   -1.03    0.72
   1   9   0   24.44    1.62
  -1   9   0   22.61    1.45
   2   9   0    1.19    0.80
  -2   9   0   -0.17    0.73
  -4  -9   0    1.71    0.68
  -4   9   0    0.56    0.79
  -5  -9   0   -0.94    0.68
  -5   9   0    1.41    0.88
  -6  -9   0    3.58    0.80
  -6   9   0    1.17    0.97
  -7  -9   0    2.48    0.96
  -7   9   0    3.21    0.95
  -8  -9   0    6.63    1.01
  -8   9   0    5.51    1.07
  -9  -9   0    2.59    1.05
  -9   9   0    0.38    0.97
 -10  -9   0    8.76    1.21
 -10   9   0    5.13    1.15
 -11  -9   0    2.35    1.16
 -11   9   0    0.66    1.09
 -12  -9   0   -0.61    1.17
 -12   9   0    2.94    1.32
 -13  -9   0   -0.07    1.38
 -13   9   0   -0.71    1.17
 -14   9   0    2.23    1.33
   0  10   0    8.73    1.08
  -1 -10   0    6.28    1.05
  -1  10   0    5.51    0.96
   1  10   0    4.18    0.97
  -2  10   0   60.81    2.66
   2  10   0   60.70    2.61
  -3  10   0    0.53    0.85
  -4 -10   0    4.75    0.73
  -5 -10   0   25.35    1.67
  -5  10   0   26.58    1.71
  -6 -10   0   -0.58    0.78
  -6  10   0    0.86    0.97
  -7 -10   0   33.15    1.86
  -7  10   0   36.36    2.01
  -8 -10   0    1.73    0.93
  -8  10   0    1.62    1.02
  -9 -10   0   46.10    2.45
  -9  10   0   44.17    2.50
 -10 -10   0    3.00    1.12
 -10  10   0    2.29    1.23
 -11 -10   0   20.87    2.16
 -11  10   0   20.26    2.09
 -12  10   0    6.54    1.37
 -13  10   0    2.95    1.48
   0  11   0   -0.40    0.92
   1  11   0    1.05    0.98
  -1  11   0    0.30    0.94
  -2  11   0    1.92    0.96
  -3  11   0   -0.91    0.90
  -4  11   0   10.36    1.31
  -5 -11   0   -0.69    0.68
  -5  11   0    4.64    1.07
  -6 -11   0   -0.18    0.91
  -6  11   0    2.32    1.14
  -7 -11   0   -0.79    0.86
  -7  11   0    0.76    1.02
  -8 -11   0    2.29    1.06
  -8  11   0    4.05    1.16
  -9 -11   0   -0.46    0.95
  -9  11   0    0.70    1.11
 -10  11   0    7.13    1.34
 -11  11   0    2.09    1.30
 -12  11   0    2.10    1.32
   0  12   0   38.62    2.34
   1  12   0   -0.29    1.02
  -1  12   0   -1.26    0.98
  -2  12   0   19.55    1.70
  -3  12   0   23.12    1.98
  -4  12   0   26.39    1.89
  -5  12   0   22.35    2.01
  -6  12   0    2.80    1.23
  -7  12   0   22.26    1.89
  -8  12   0    2.66    1.30
  -9  12   0   15.91    1.64
 -10  12   0    1.30    1.29
 -11  12   0    9.88    1.56
   0  13   0    2.57    1.24
   1  13   0    0.82    1.13
  -1  13   0   -0.18    1.07
  -2  13   0    7.75    1.30
  -3  13   0   11.06    1.42
  -4  13   0   -1.55    1.08
  -5  13   0   -0.42    1.21
  -6  13   0    1.77    1.30
  -7  13   0    2.06    1.25
  -8  13   0   -0.47    1.22
  -9  13   0   -1.13    1.42
   0  14   0   44.40    2.57
  -1  14   0    8.29    1.41
  -2  14   0    6.26    1.38
  -3  14   0   11.92    1.55
  -4  14   0    0.72    1.29
  -5  14   0   18.75    2.05
  -6  14   0   -1.07    1.38
  -7  14   0    8.22    1.55
   0  15   0    0.20    1.32
  -1  15   0    4.61    1.47
  -2  15   0   -0.23    1.35
  -3  15   0    2.54    1.43
  -4  15   0    2.69    1.56
 -18   0   1   -2.29    1.30
 -17   0   1    1.35    1.32
  16   0  -1   -1.47    1.21
 -16   0   1   -2.25    1.13
  15   0  -1    1.86    1.13
 -15   0   1    0.95    1.20
 -14   0   1    0.57    1.17
  14   0  -1   -1.39    0.97
  13   0  -1    1.05    0.85
 -13   0   1   -0.89    1.04
  12   0  -1    1.60    0.83
 -12   0   1    0.67    0.90
  11   0  -1    0.41    0.75
 -11   0   1   -1.07    0.86
 -10   0   1   -1.32    0.75
  10   0  -1   -0.09    0.69
  -9   0   1   -0.54    0.67
   9   0  -1    0.05    0.64
  -8   0   1    0.33    0.62
  -7   0   1   -0.92    0.57
  -6   0   1    0.47    0.53
  -5   0   1   -0.16    0.49
  -4   0   1   -0.66    0.46
  -3   0   1    0.08    0.39
   2   0  -1    0.29    0.72
  -2   0  -1   -0.10    0.29
  -3   0  -1   -0.57    0.35
  -4   0  -1   -0.28    0.43
  -5   0  -1   -0.93    0.47
  -6   0  -1    0.04    0.51
  -7   0  -1   -0.44    0.55
  -8   0  -1   -0.47    0.59
   9   0   1    0.19    0.57
  -9   0  -1   -0.36    0.69
  10   0   1   -0.20    0.64
 -10   0  -1    1.17    0.80
  11   0   1   -0.03    0.66
 -11   0  -1   -0.21    0.85
  12   0   1    0.21    0.74
 -12   0  -1    0.60    0.97
 -13   0  -1    0.06    1.03
  13   0   1   -0.38    0.77
  14   0   1   -2.69    0.78
 -14   0  -1   -1.30    1.09
 -15   0  -1   -1.35    1.12
  15   0   1    1.34    0.93
 -16   0  -1    0.06    1.28
 -17   0  -1    0.82    1.38
 -18  -1   1    3.15    1.52
 -18   1   1    3.69    1.42
 -17  -1   1    2.14    1.41
 -17   1   1   -1.29    1.32
 -16  -1   1   29.71    2.22
  16  -1  -1   20.90    1.94
  16   1  -1   26.44    2.04
 -16   1   1   28.62    2.25
  15  -1  -1   30.89    1.96
 -15  -1   1   32.09    2.26
  15   1  -1   34.78    2.09
 -15   1   1   33.87    2.23
  14  -1  -1   13.27    1.34
 -14  -1   1   11.70    1.44
  14   1  -1   13.45    1.48
 -14   1   1   12.39    1.46
  13  -1  -1   30.32    1.77
 -13  -1   1   28.89    1.95
 -13   1   1   30.77    2.00
  13   1  -1   30.51    1.80
 -12  -1   1    0.26    0.90
  12  -1  -1    0.98    0.82
 -12   1   1    3.03    1.01
 -11  -1   1   55.19    2.45
  11  -1  -1   59.16    2.46
 -11   1   1   55.88    2.48
  10  -1  -1    8.03    0.88
 -10  -1   1    7.04    0.95
 -10   1   1    7.04    0.96
   9  -1  -1  162.50    5.38
  -9  -1   1  156.03    5.39
  -9   1   1  158.95    5.40
   8  -1  -1   20.61    1.16
  -8  -1   1   18.37    1.06
  -8   1   1   19.94    1.23
  -7  -1   1   26.29    1.30
   7  -1  -1   23.94    1.24
  -7   1   1   24.75    1.30
   6  -1  -1  146.41    4.81
  -6  -1   1  145.54    4.83
  -6   1   1  144.74    4.83
   5  -1  -1   43.15    1.66
  -5  -1   1   42.87    1.69
  -5   1   1   44.51    1.70
   4  -1  -1  137.17    4.50
  -4  -1   1  138.15    4.50
  -4   1   1  138.39    4.51
  -3  -1   1    3.99    0.47
   3  -1  -1    4.62    0.47
  -3   1   1    4.57    0.49
   2  -1  -1  285.88    8.87
   2   1  -1  282.78    8.84
  -2   1   1  271.29    8.86
  -1   1  -1  495.77   16.29
   2  -1   1    7.96    0.45
  -2  -1  -1    7.61    0.56
  -2   1  -1    7.19    0.44
  -2   1  -1    7.29    0.47
   3  -1   1  168.06    5.38
  -3  -1  -1  166.40    5.41
  -3   1  -1  166.49    5.38
  -3   1  -1  172.38    5.39
  -4  -1  -1    7.02    0.73
  -4   1  -1    8.45    0.66
  -5  -1  -1    8.57    0.79
  -5   1  -1    8.78    0.76
  -6  -1  -1    2.17    0.47
  -6   1  -1    1.55    0.55
  -7  -1  -1    8.02    0.78
  -7   1  -1    7.57    0.74
  -8  -1  -1    6.47    0.80
  -8   1  -1    6.35    0.75
  -9  -1  -1   53.79    2.19
  -9   1  -1   51.55    2.16
  10  -1   1    7.11    0.79
 -10  -1  -1    8.44    0.99
 -10   1  -1    6.93    0.93
 -11  -1  -1   18.59    1.57
  11  -1   1   22.44    1.27
 -11   1  -1   23.28    1.56
 -12  -1  -1   34.77    1.95
  12  -1   1   28.71    1.56
 -12   1  -1   33.08    1.93
 -13  -1  -1    1.23    1.05
  13  -1   1    1.78    0.80
 -13   1  -1   -0.23    1.02
  13   1   1    1.11    0.83
 -14  -1  -1   29.19    2.02
  14   1   1   25.82    1.73
 -14   1  -1   25.85    1.99
 -15  -1  -1    4.29    1.39
  15   1   1    2.61    1.06
 -15   1  -1    2.83    1.21
 -16  -1  -1   19.91    2.09
 -16   1  -1   26.89    2.16
 -17  -1  -1   30.09    2.38
 -17   1  -1   29.20    2.60
 -17  -2   1    5.97    1.47
 -17   2   1    2.10    1.39
 -16  -2   1    2.38    1.36
  16   2  -1    3.25    1.25
 -16   2   1    1.65    1.29
  15  -2  -1    2.91    0.95
 -15  -2   1    0.99    1.25
 -15   2   1    0.44    1.20
  15   2  -1    0.11    1.05
 -14  -2   1    1.21    1.17
  14  -2  -1   -0.67    0.93
 -14   2   1    1.64    1.11
  13  -2  -1    4.99    0.93
 -13  -2   1    5.14    1.17
 -13   2   1    3.67    1.16
  12  -2  -1    1.42    0.83
 -12  -2   1    0.86    0.98
 -12   2   1    0.22    0.98
  11  -2  -1   41.75    1.87
 -11  -2   1   43.39    2.01
 -11   2   1   31.99    1.94
 -10  -2   1   11.00    1.24
  10  -2  -1   11.00    1.07
 -10   2   1   11.37    1.08
   9  -2  -1    1.45    0.63
  -9  -2   1    0.77    0.73
  -9   2   1   -0.28    0.70
   8  -2  -1    1.38    0.57
  -8  -2   1    1.38    0.67
  -8   2   1    1.22    0.66
  -7  -2   1    2.57    0.65
   7  -2  -1    1.97    0.54
  -7   2   1    1.98    0.65
   6  -2  -1    9.93    0.91
  -6  -2   1    8.33    0.88
  -6   2   1    9.46    0.88
  -5  -2   1    0.05    0.50
   5  -2  -1    0.40    0.45
  -5   2   1    1.40    0.53
  -4  -2   1   49.70    1.81
   4  -2  -1   47.81    1.77
  -4   2   1   49.43    1.80
  -3  -2   1    1.46    0.42
   3  -2  -1    2.03    0.42
  -3   2   1    1.68    0.46
   2  -2  -1    0.53    0.35
  -2   2   1    0.13    0.38
   2   2  -1    0.76    0.36
   1  -2  -1    4.28    0.41
  -1  -2   1    4.90    0.44
   1   2  -1    3.92    0.41
  -1   2   1    3.83    0.42
   1   2  -1    4.58    0.46
   0  -2  -1   60.84    2.04
   0   2   1   60.65    2.05
   0   2  -1   60.45    1.98
   0   2  -1   61.77    1.98
  -1  -2  -1  122.36    3.96
  -1   2  -1  122.94    3.89
  -1   2  -1  121.87    3.89
  -2  -2  -1  141.59    4.68
  -2   2  -1  145.94    4.64
  -2   2  -1  148.19    4.64
  -3  -2  -1 1000.00   31.42
   4  -2   1   33.44    1.27
  -4  -2  -1   31.51    1.30
  -4   2  -1   34.12    1.32
  -4   2  -1   32.81    1.29
  -5  -2  -1  137.92    4.63
   5  -2   1  140.96    4.56
  -5   2  -1  140.45    4.59
  -5   2  -1  139.40    4.61
  -6  -2  -1    0.04    0.56
  -6   2  -1    0.73    0.57
  -7  -2  -1   11.05    1.00
  -7   2  -1   12.11    0.93
  -8  -2  -1   -1.01    0.63
  -8   2  -1    0.56    0.62
  -9  -2  -1   -0.35    0.70
  -9   2  -1   -0.49    0.75
 -10  -2  -1    0.83    0.83
 -10   2  -1    0.70    0.80
 -11  -2  -1   11.74    1.20
 -11   2  -1   13.22    1.37
 -12  -2  -1    2.35    0.98
 -12   2  -1    3.11    1.02
 -13  -2  -1    3.38    1.13
 -13   2  -1    2.41    1.10
 -14  -2  -1    1.67    1.19
 -14   2  -1    5.02    1.23
 -15  -2  -1   11.32    1.50
  15   2   1   10.46    1.25
 -15   2  -1    9.61    1.54
 -16  -2  -1    0.28    1.25
 -16   2  -1    2.67    1.30
 -17  -2  -1   -1.01    1.29
 -17   2  -1   -2.52    1.32
 -17  -3   1    5.75    1.42
 -17   3   1    2.26    1.43
 -16  -3   1    0.71    1.18
 -16   3   1    2.76    1.44
 -15  -3   1    6.07    1.33
  15  -3  -1    5.94    1.07
 -15   3   1    7.04    1.32
  14  -3  -1    8.22    1.05
 -14  -3   1    8.90    1.37
 -14   3   1   10.43    1.39
  13  -3  -1  133.24    4.65
 -13  -3   1  123.78    4.74
 -13   3   1  127.97    4.76
  12  -3  -1    0.96    0.76
 -12  -3   1    1.56    0.98
 -12   3   1    1.29    1.00
  11  -3  -1   53.61    2.24
 -11  -3   1   53.11    2.39
 -11   3   1   54.35    2.42
  10  -3  -1    9.82    1.03
 -10  -3   1   11.63    1.24
 -10   3   1   10.61    1.07
   9  -3  -1   10.69    0.92
  -9  -3   1   10.27    1.13
  -9   3   1   10.91    1.16
   8  -3  -1   50.61    2.01
  -8  -3   1   52.16    2.11
  -8   3   1   52.50    2.11
  -7  -3   1   40.26    1.74
   7  -3  -1   41.51    1.66
  -7   3   1   41.18    1.73
  -6  -3   1   65.83    2.47
   6  -3  -1   69.15    2.45
  -6   3   1   68.36    2.48
   5  -3  -1   17.72    1.01
  -5  -3   1   18.55    1.04
  -5   3   1   18.03    1.04
   4  -3  -1   22.47    1.01
  -4  -3   1   21.43    1.05
  -4   3   1   21.33    1.06
   3  -3  -1    0.00    0.38
  -3  -3   1    0.42    0.35
  -3   3   1    0.36    0.46
   2  -3  -1  229.23    7.46
   2   3  -1  241.10    7.46
  -2   3   1  231.38    7.47
   1  -3  -1  281.94    8.85
  -1  -3   1  283.38    8.81
   1   3  -1  274.70    8.82
   1   3  -1  274.19    8.82
  -1   3   1  278.73    8.85
   0  -3  -1  101.93    3.33
   0   3  -1  101.11    3.28
   0   3   1  101.36    3.31
   0   3  -1   99.80    3.28
  -1  -3  -1   24.53    1.08
   1   3   1   24.15    1.09
  -1   3  -1   25.43    0.98
  -1   3  -1   24.72    0.98
  -2  -3  -1  194.32    6.22
  -2   3  -1  193.93    6.16
  -2   3  -1  191.45    6.16
  -3  -3  -1  513.22   16.12
  -3   3  -1  515.03   16.06
  -3   3  -1  500.82   16.06
  -4  -3  -1   21.28    1.09
  -4   3  -1   21.00    1.02
  -4   3  -1   20.14    0.95
  -5  -3  -1  215.55    6.95
  -5   3  -1  210.49    6.88
  -5   3  -1  214.90    6.90
  -6  -3  -1   51.28    2.02
  -6   3  -1   52.32    1.94
  -6   3  -1   49.93    1.94
   7  -3   1   12.77    1.06
  -7  -3  -1   10.81    1.04
  -7   3  -1   14.11    0.99
  -8  -3  -1    8.15    0.89
   8  -3   1    8.54    0.80
  -8   3  -1    7.85    0.82
  -9  -3  -1    5.26    0.88
   9  -3   1    4.60    0.68
  -9   3  -1    4.90    0.83
  10  -3   1   69.93    2.65
 -10  -3  -1   66.04    2.76
 -10   3  -1   67.90    2.73
 -11  -3  -1    2.40    0.95
  11  -3   1   -0.10    0.90
 -11   3  -1    0.11    0.86
 -12  -3  -1  108.51    4.26
  12  -3   1  120.61    4.87
 -12   3  -1  113.47    4.24
 -13  -3  -1    7.08    1.23
 -13   3  -1    4.47    1.14
 -14  -3  -1   26.69    2.05
 -14   3  -1   23.97    1.93
 -15  -3  -1   23.43    2.07
 -15   3  -1   24.26    2.25
 -16  -3  -1    7.84    1.48
 -16   3  -1    8.41    1.50
 -17  -3  -1    2.86    1.38
 -17   3  -1   -0.22    1.37
 -17  -4   1    0.04    1.35
 -17   4   1    0.16    1.42
 -16  -4   1    1.59    1.25
 -16   4   1    0.67    1.28
 -15  -4   1    3.54    1.22
 -15   4   1    4.15    1.33
  14  -4  -1    0.07    0.69
 -14  -4   1   -0.50    1.06
 -14   4   1   -0.50    1.10
  13  -4  -1   -1.07    0.69
 -13  -4   1    1.82    1.16
 -13   4   1    0.28    1.10
 -12  -4   1   16.18    1.59
  12  -4  -1   15.29    1.22
 -12   4   1   14.14    1.55
  11  -4  -1   51.49    2.20
 -11  -4   1   53.46    2.42
 -11   4   1   54.99    2.55
 -10  -4   1    0.52    0.84
  10  -4  -1    1.14    0.63
 -10   4   1   -1.14    0.82
  -9  -4   1    1.95    0.76
   9  -4  -1    2.59    0.63
  -9   4   1    1.17    0.79
   8  -4  -1    0.23    0.49
  -8  -4   1   -0.42    0.61
  -8   4   1    0.18    0.69
   7  -4  -1    5.22    0.61
  -7  -4   1    5.03    0.75
  -7   4   1    5.30    0.77
  -6  -4   1    1.18    0.55
   6  -4  -1    0.88    0.44
  -6   4   1    1.55    0.60
   5  -4  -1    6.20    0.63
  -5  -4   1    5.57    0.64
  -5   4   1    6.88    0.70
   4  -4  -1    3.28    0.46
  -4  -4   1    4.92    0.57
  -4   4   1    3.58    0.60
   3  -4  -1    3.38    0.44
  -3   4   1    3.53    0.57
   2  -4  -1   11.28    0.77
  -2   4   1   11.33    0.83
   2   4  -1   11.04    0.85
   1  -4  -1    6.41    0.71
  -1  -4   1    6.19    0.62
   1   4  -1    6.04    0.55
   1   4  -1    6.32    0.63
  -1   4   1    6.29    0.60
   0  -4  -1   11.88    0.80
   0   4  -1   14.10    0.79
   0   4   1   13.18    0.86
   0   4  -1   14.13    0.80
  -1  -4  -1    0.59    0.46
  -1   4  -1    0.84    0.40
   1   4   1    0.74    0.39
  -1   4  -1    0.32    0.37
  -2  -4  -1   28.88    1.28
  -2   4  -1   30.07    1.16
  -2   4  -1   30.00    1.17
  -3  -4  -1    0.02    0.50
  -3   4  -1   -0.19    0.36
  -3   4  -1    0.57    0.46
  -4  -4  -1    1.38    0.57
  -4   4  -1    1.77    0.46
  -4   4  -1    1.71    0.43
  -5  -4  -1   36.08    1.61
  -5   4  -1   37.80    1.48
  -5   4  -1   37.08    1.55
  -6  -4  -1    8.98    0.79
  -6   4  -1   11.15    0.87
  -6   4  -1    9.62    0.96
  -7  -4  -1   47.26    1.98
  -7   4  -1   47.77    1.91
  -8  -4  -1    0.70    0.70
  -8   4  -1    0.69    0.63
  -9  -4  -1    4.41    0.88
  -9   4  -1    3.27    0.80
 -10  -4  -1   26.49    1.67
 -10   4  -1   26.49    1.60
 -11  -4  -1    1.11    0.93
 -11   4  -1    1.69    0.92
 -12  -4  -1   -0.01    1.02
 -12   4  -1    0.52    0.93
 -13  -4  -1    1.84    1.14
 -13   4  -1    1.52    1.03
 -14  -4  -1    3.61    1.27
 -14   4  -1    4.18    1.20
 -15  -4  -1    2.28    1.29
 -15   4  -1    0.11    1.29
 -16  -4  -1    0.69    1.30
 -16   4  -1   -0.66    1.25
 -17  -4  -1   -0.42    1.47
 -17   4  -1    0.95    1.35
 -17  -5   1    0.53    1.42
 -17   5   1    0.29    1.35
 -16  -5   1   21.97    2.16
 -16   5   1   16.57    1.82
 -15  -5   1   14.74    1.64
 -15   5   1   14.11    1.65
 -14  -5   1    0.39    1.10
 -14   5   1   -1.02    1.14
 -13  -5   1   12.27    1.34
 -13   5   1    8.06    1.32
 -12  -5   1   -2.66    0.92
 -12   5   1    1.79    1.03
 -11  -5   1   55.43    2.52
 -11   5   1   56.19    2.55
 -10  -5   1    7.90    1.01
 -10   5   1    7.42    1.12
  -9  -5   1   46.04    2.10
  -9   5   1   49.21    2.15
  -8  -5   1   62.25    2.47
  -8   5   1   61.16    2.47
   7  -5  -1    0.08    0.31
  -7  -5   1    0.23    0.63
  -7   5   1    0.49    0.63
  -6  -5   1   21.08    1.18
  -6   5   1   19.75    1.20
  -5  -5   1    0.33    0.52
   5  -5  -1    0.14    0.26
  -5   5   1    0.00    0.56
  -4  -5   1   10.03    0.80
  -4   5   1    9.92    0.89
  -3  -5   1    0.14    0.28
   3  -5  -1    0.58    0.34
  -3   5   1    2.39    0.57
   2  -5  -1    8.47    0.66
  -2   5   1    9.70    0.85
   2   5  -1    8.79    0.79
   1  -5  -1    1.24    0.44
  -1  -5   1    0.89    0.41
   1   5  -1    0.82    0.46
  -1   5   1    1.21    0.54
   1   5  -1    1.14    0.47
   0  -5  -1   43.82    1.72
   0   5   1   45.19    1.73
   0   5  -1   44.28    1.65
   0   5  -1   43.32    1.67
  -1  -5  -1   24.25    1.18
   1   5   1   22.45    1.16
  -1   5  -1   22.19    1.10
  -1   5  -1   22.60    1.02
  -2  -5  -1    0.74    0.51
  -2   5  -1    0.84    0.49
  -2   5  -1    0.69    0.46
  -3  -5  -1   75.34    2.68
  -3   5  -1   76.97    2.63
  -3   5  -1   74.07    2.61
  -4  -5  -1   35.44    1.46
  -4   5  -1   35.47    1.43
  -4   5  -1   34.34    1.44
  -5  -5  -1  219.78    7.12
  -5   5  -1  213.75    7.04
  -5   5  -1  217.09    7.03
  -6  -5  -1   58.67    2.21
  -6   5  -1   57.25    2.19
  -6   5  -1   58.93    2.20
  -7  -5  -1  108.34    3.67
  -7   5  -1  105.27    3.79
  -7   5  -1   93.01    3.55
  -8  -5  -1   72.72    2.82
  -8   5  -1   73.11    2.77
  -9  -5  -1   25.12    1.57
  -9   5  -1   24.21    1.48
 -10  -5  -1   46.12    2.22
 -10   5  -1   43.79    2.11
 -11  -5  -1    2.33    1.01
 -11   5  -1    1.54    0.92
 -12  -5  -1   12.10    1.38
 -12   5  -1   14.58    1.53
 -13  -5  -1   -1.54    1.06
 -13   5  -1   -0.42    1.01
 -14  -5  -1   21.76    1.97
 -14   5  -1   19.32    1.85
 -15  -5  -1    1.42    1.27
 -15   5  -1    1.32    1.21
 -16  -5  -1   12.13    1.57
 -16   5  -1    6.36    1.43
 -16  -6   1   -0.79    1.42
 -16   6   1    0.49    1.32
 -15  -6   1    5.61    1.51
 -15   6   1    6.94    1.43
 -14  -6   1    0.71    1.20
 -14   6   1    0.59    1.17
 -13  -6   1    1.29    1.11
  13  -6  -1   -0.13    1.12
 -13   6   1   -0.05    1.09
 -12  -6   1    1.82    1.00
  12  -6  -1    1.06    0.87
 -12   6   1    0.94    1.03
 -11  -6   1   -0.66    0.92
 -11   6   1    1.14    0.97
 -10  -6   1    6.07    0.99
 -10   6   1    6.87    1.06
  -9  -6   1   12.96    1.28
  -9   6   1   15.22    1.37
  -8  -6   1    0.55    0.72
  -8   6   1    0.30    0.78
  -7  -6   1    4.75    0.78
  -7   6   1    4.90    0.82
  -6  -6   1    0.96    0.62
  -6   6   1   -0.51    0.70
  -5  -6   1   16.69    1.05
  -5   6   1   16.90    1.15
  -4  -6   1   -0.19    0.43
  -4   6   1    0.06    0.60
  -2   6   1   27.48    1.32
   2   6  -1   27.34    1.29
   1  -6  -1    0.52    0.43
  -1  -6   1    1.15    0.50
   1   6  -1    0.68    0.55
   1   6  -1    0.60    0.51
  -1   6   1    0.76    0.55
   0  -6  -1    8.90    0.79
   0   6  -1    9.56    0.80
   0   6   1    9.55    0.93
   0   6  -1   10.24    0.89
  -1  -6  -1   47.65    1.87
   1   6   1   44.42    1.88
  -1   6  -1   47.87    1.83
  -1   6  -1   47.46    1.83
  -2  -6  -1   32.15    1.43
  -2   6  -1   32.50    1.42
  -2   6  -1   32.31    1.42
   2   6   1   31.81    1.48
  -3  -6  -1    9.30    0.89
  -3   6  -1    9.51    0.88
  -3   6  -1    9.24    0.81
  -4  -6  -1    2.91    0.64
  -4   6  -1    1.16    0.59
  -4   6  -1    2.17    0.54
  -5  -6  -1    0.90    0.63
  -5   6  -1    0.95    0.60
  -5   6  -1    0.36    0.60
  -6  -6  -1    2.42    0.71
  -6   6  -1    2.03    0.67
  -6   6  -1    2.41    0.72
  -7  -6  -1    5.81    0.87
  -7   6  -1    6.27    0.97
  -7   6  -1    5.42    0.77
  -8  -6  -1   22.28    1.50
  -8   6  -1   22.09    1.50
  -9  -6  -1    6.05    0.99
  -9   6  -1    5.70    1.01
 -10  -6  -1    5.93    1.10
 -10   6  -1    3.87    0.96
 -11  -6  -1    0.84    1.04
 -11   6  -1    1.55    0.94
 -12  -6  -1    0.35    1.10
 -12   6  -1   -0.05    1.08
 -13  -6  -1    2.41    1.21
 -13   6  -1    3.03    1.24
 -14  -6  -1   -0.72    1.10
 -14   6  -1   -0.02    1.11
 -15  -6  -1    0.53    1.35
 -15   6  -1   -0.06    1.26
 -16  -6  -1    0.92    1.35
 -16   6  -1    0.30    1.33
 -16  -7   1    5.47    1.69
 -16   7   1    5.55    1.52
 -15  -7   1   12.39    1.69
 -15   7   1   11.37    1.60
 -14  -7   1   10.90    1.53
 -14   7   1    8.48    1.40
 -13  -7   1   16.88    1.85
 -13   7   1   15.80    1.79
 -12  -7   1   -1.63    1.00
 -12   7   1    0.94    1.06
 -11  -7   1   35.42    1.98
 -11   7   1   34.51    2.05
  10  -7  -1    1.28    1.35
 -10  -7   1   -0.42    0.86
 -10   7   1   -0.74    0.93
  -9  -7   1   58.20    2.45
   9  -7  -1   54.19    2.34
  -9   7   1   55.79    2.49
   8  -7  -1    8.12    0.87
  -8  -7   1    6.91    0.95
  -8   7   1    5.19    0.97
  -7  -7   1   27.57    1.50
   7  -7  -1   31.39    1.92
  -7   7   1   25.21    1.58
  -6  -7   1   80.09    2.97
  -6   7   1   78.25    3.04
  -5  -7   1    3.40    0.64
  -5   7   1    3.03    0.78
  -3   7   1    5.82    0.78
  -2  -7   1  180.21    5.74
  -2   7   1  172.23    5.79
   2   7  -1  168.63    5.76
   1  -7  -1   -0.07    0.36
  -1   7   1   -0.06    0.62
   1   7  -1   -0.88    0.60
   0  -7  -1   45.20    1.78
   0   7  -1   45.76    1.81
   0   7   1   44.74    1.89
   0   7  -1   44.47    1.88
  -1  -7  -1   98.68    3.45
   1   7   1   94.64    3.48
  -1   7  -1  100.35    3.44
  -1   7  -1  100.74    3.44
  -2  -7  -1   18.66    1.11
  -2   7  -1   18.69    1.19
  -2   7  -1   18.11    1.07
   2   7   1   19.75    1.24
  -3  -7  -1   27.79    1.39
  -3   7  -1   27.15    1.40
  -3   7  -1   28.80    1.34
  -4  -7  -1    0.30    0.61
  -4   7  -1   -0.79    0.57
  -4   7  -1    0.21    0.57
  -5  -7  -1   78.72    2.98
  -5   7  -1   80.58    2.92
  -5   7  -1   81.11    2.92
  -6  -7  -1   30.98    1.62
  -6   7  -1   30.29    1.65
  -6   7  -1   31.44    1.55
  -7  -7  -1    2.42    0.81
  -7   7  -1    3.95    0.78
  -8  -7  -1   38.96    1.94
  -8   7  -1   37.19    1.85
  -9  -7  -1    1.62    0.95
  -9   7  -1    1.68    0.86
 -10  -7  -1    9.74    1.24
 -10   7  -1   10.40    1.16
 -11  -7  -1    2.07    1.08
 -11   7  -1    2.26    1.07
 -12  -7  -1   13.54    1.50
 -12   7  -1   13.76    1.37
 -13  -7  -1   -0.53    1.18
 -13   7  -1    0.39    1.10
 -14  -7  -1   15.46    1.67
 -14   7  -1   17.25    1.87
 -15  -7  -1   -1.05    1.33
 -15   7  -1   -1.50    1.24
 -15   8   1    3.52    1.41
 -14  -8   1    1.57    1.43
 -14   8   1    0.61    1.34
 -13  -8   1   -0.11    1.20
 -13   8   1    0.30    1.15
 -12  -8   1   -0.77    1.19
 -12   8   1    0.35    1.10
 -11  -8   1    2.06    1.00
 -11   8   1    1.62    1.07
 -10  -8   1   11.23    1.21
 -10   8   1   12.73    1.39
  -9  -8   1   10.26    1.12
  -9   8   1   10.63    1.28
  -8  -8   1    7.23    0.96
  -8   8   1    7.60    1.09
  -7  -8   1   20.79    1.35
  -7   8   1   18.91    1.49
   6  -8  -1    5.90    0.83
  -6  -8   1    4.95    0.79
  -6   8   1    4.62    0.93
  -5  -8   1   15.20    1.13
   5  -8  -1   16.32    1.13
  -5   8   1   17.37    1.46
  -4   8   1    0.40    0.75
  -3   8   1    0.29    0.71
  -2  -8   1   12.12    1.19
  -2   8   1    8.39    0.92
   2   8  -1   10.17    1.05
   1   8  -1   16.73    1.14
  -1   8   1   16.27    1.22
   0  -8  -1    1.46    0.54
   0   8  -1    1.10    0.61
   0   8   1    1.21    0.74
  -1  -8  -1    8.62    0.91
  -1   8  -1   10.18    0.92
  -1   8  -1    9.68    1.07
   1   8   1   10.48    1.11
  -2  -8  -1   16.69    1.11
   2   8   1   15.48    1.25
  -2   8  -1   13.46    1.16
  -2   8  -1   14.99    1.17
  -3  -8  -1    3.07    0.69
  -3   8  -1    4.48    0.83
  -3   8  -1    3.78    0.71
  -4  -8  -1   -0.12    0.65
  -4   8  -1   -0.06    0.66
  -4   8  -1    1.11    0.66
  -5  -8  -1   -0.55    0.70
  -5   8  -1   -0.12    0.77
  -5   8  -1   -0.31    0.72
  -6  -8  -1   -0.51    0.73
  -6   8  -1    0.57    0.81
  -6   8  -1    0.56    1.34
  -7  -8  -1   10.55    1.17
  -7   8  -1    8.52    1.09
  -8  -8  -1    2.64    0.91
  -8   8  -1    0.58    0.83
  -9  -8  -1   -0.14    0.94
  -9   8  -1    0.08    0.88
 -10  -8  -1    0.94    1.10
 -10   8  -1    0.98    0.96
 -11  -8  -1    2.42    1.15
 -11   8  -1   -1.18    0.91
 -12  -8  -1    2.79    1.33
 -12   8  -1    1.01    1.07
 -13  -8  -1   -2.26    1.28
 -13   8  -1   -0.78    1.22
 -14  -8  -1   -0.94    1.34
 -14   8  -1    0.45    1.32
 -15  -8  -1    3.06    1.50
 -15   8  -1    1.64    1.50
 -14   9   1    0.67    1.29
 -13  -9   1    3.90    1.56
 -13   9   1    4.43    1.37
 -12  -9   1    1.76    1.14
 -12   9   1    1.21    1.29
 -11  -9   1   11.10    1.32
 -11   9   1   12.00    1.41
 -10  -9   1    7.35    1.13
 -10   9   1    7.52    1.25
  -9  -9   1    6.40    1.14
  -9   9   1    3.76    1.09
  -8  -9   1   65.84    2.68
  -8   9   1   61.81    2.87
  -7  -9   1   12.44    1.33
  -7   9   1    8.95    1.18
  -6  -9   1   14.79    1.19
  -6   9   1   15.10    1.44
  -5  -9   1   -0.35    0.59
  -5   9   1    3.39    0.94
   4  -9  -1   95.10    3.69
  -4   9   1  101.28    3.66
  -3  -9   1    0.01    0.67
   3  -9  -1    0.49    0.65
  -3   9   1   -0.06    0.80
   2   9  -1   63.19    2.56
  -2   9   1   64.35    2.60
   1   9  -1   20.63    1.39
  -1   9   1   21.43    1.45
   0   9  -1    8.73    1.02
   0   9   1   11.64    1.25
  -1  -9  -1   27.98    1.40
  -1   9  -1   27.68    1.51
   1   9   1   27.38    1.64
  -2  -9  -1   33.13    1.60
   2   9   1   31.88    1.75
  -2   9  -1   31.63    1.62
  -3  -9  -1  119.14    4.14
  -3   9  -1  115.18    4.13
  -4  -9  -1    2.09    0.78
  -4   9  -1    1.44    0.78
  -5  -9  -1   87.26    3.29
  -5   9  -1   85.46    3.31
  -6  -9  -1   12.75    1.34
  -6   9  -1   14.58    1.46
  -7  -9  -1   46.49    2.35
  -7   9  -1   50.88    2.36
  -8  -9  -1    7.42    1.09
  -8   9  -1    5.28    1.02
  -9  -9  -1    9.06    1.19
  -9   9  -1    7.79    1.14
 -10  -9  -1    8.30    1.24
 -10   9  -1    9.28    1.23
 -11  -9  -1    4.84    1.27
 -11   9  -1    3.34    1.12
 -12  -9  -1    3.52    1.33
 -12   9  -1    2.08    1.28
 -13  -9  -1   -0.18    1.37
 -13   9  -1    2.76    1.25
 -14  -9  -1    3.98    1.58
 -14   9  -1    5.38    1.42
 -13  10   1   -0.63    1.28
 -12  10   1    2.99    1.31
 -11 -10   1    0.22    1.02
 -11  10   1   -1.25    1.26
 -10 -10   1    4.25    1.07
 -10  10   1    2.55    1.30
  -9 -10   1   -0.61    1.01
  -9  10   1   -0.96    1.11
  -8 -10   1   -0.29    0.83
  -8  10   1    0.47    1.01
  -7 -10   1    3.13    0.85
  -7  10   1    2.74    1.01
  -6 -10   1   -0.41    0.69
  -6  10   1    2.20    1.02
  -5  10   1    0.41    0.94
  -4 -10   1   -1.00    0.84
  -4  10   1    0.61    0.91
  -3  10   1   -0.62    0.87
   2 -10  -1   25.64    1.51
  -2  10   1   28.61    1.73
   2  10  -1   27.67    1.68
  -1  10   1    0.97    0.92
   1  10  -1    2.62    0.88
   0  10   1    0.77    0.92
   0  10  -1    0.69    0.82
   1  10   1   28.84    1.77
  -1  10  -1   27.97    1.64
  -2 -10  -1   17.26    1.22
  -2  10  -1   13.36    1.32
  -3 -10  -1    0.18    0.72
  -3  10  -1   -0.48    0.81
  -4 -10  -1   17.79    1.37
  -4  10  -1   17.97    1.58
  -5 -10  -1    2.15    0.96
  -5  10  -1    0.79    0.86
  -6 -10  -1    0.10    0.86
  -6  10  -1    0.02    0.90
  -7 -10  -1   -1.29    0.83
  -7  10  -1    0.76    0.90
  -8 -10  -1    3.67    1.15
  -8  10  -1    4.53    1.04
  -9 -10  -1   -0.81    1.04
  -9  10  -1    0.85    1.11
 -10 -10  -1    1.76    1.27
 -10  10  -1    1.86    1.19
 -11 -10  -1    2.67    1.31
 -11  10  -1    0.88    1.23
 -12 -10  -1    3.00    1.47
 -12  10  -1    0.43    1.22
 -13  10  -1    0.72    1.46
 -12  11   1    0.32    1.34
 -11  11   1   11.19    1.57
 -10  11   1   12.23    1.51
  -9  11   1    8.79    1.35
  -8 -11   1   37.34    2.02
  -8  11   1   36.03    2.23
  -7 -11   1    1.82    0.80
  -7  11   1    5.48    1.14
  -6  11   1   44.18    2.32
  -5 -11   1    0.63    1.11
  -5  11   1    0.92    1.02
  -4  11   1    9.29    1.21
  -3  11   1    1.18    1.08
  -2  11   1   42.76    2.22
   1 -11  -1    5.75    1.04
   1  11  -1    6.09    1.07
  -1  11   1    7.59    1.16
   0  11  -1   38.05    2.02
   0  11   1   37.85    2.11
  -1  11  -1    2.08    0.93
   1  11   1    2.27    1.14
  -3 -11  -1    1.07    0.78
  -3  11  -1   -0.95    0.87
  -4 -11  -1    7.82    1.11
  -4  11  -1    7.46    1.18
  -5 -11  -1   42.18    2.12
  -5  11  -1   42.27    2.30
  -6 -11  -1    7.49    1.09
  -6  11  -1    9.56    1.27
  -7 -11  -1   11.70    1.29
  -7  11  -1   12.36    1.31
  -8 -11  -1   18.18    1.74
  -8  11  -1   24.37    1.97
  -9 -11  -1   13.57    1.46
  -9  11  -1   17.28    1.72
 -10 -11  -1   16.62    1.78
 -10  11  -1   19.06    1.85
 -11  11  -1    4.28    1.30
 -12  11  -1   12.14    1.76
 -11  12   1    2.59    1.44
 -10  12   1    7.03    1.50
  -9  12   1   -0.48    1.22
  -8  12   1   -1.16    1.11
  -7  12   1    1.88    1.15
  -6  12   1   -0.22    1.09
  -5  12   1    8.39    1.30
  -4  12   1    1.42    1.10
  -3  12   1    1.87    1.10
  -2  12   1   10.60    1.33
   1  12  -1    8.45    1.21
  -1  12   1    5.66    1.28
   0  12  -1   -0.33    1.00
   0  12   1    3.18    1.13
  -1  12  -1   -0.35    1.08
   1  12   1    0.17    1.03
  -2  12  -1    0.95    1.00
  -3  12  -1    7.10    1.20
  -4 -12  -1    6.51    1.03
  -4  12  -1    5.85    1.16
  -5 -12  -1   -2.71    0.86
  -5  12  -1    0.39    0.98
  -6 -12  -1    6.45    1.17
  -6  12  -1    4.89    1.18
  -7  12  -1    2.90    1.11
  -8  12  -1   -0.22    1.10
  -9  12  -1    1.52    1.35
 -10  12  -1   -0.47    1.35
 -11  12  -1    1.89    1.48
  -9  13   1   19.15    2.13
  -8  13   1    2.39    1.47
  -7  13   1    4.95    1.36
  -6  13   1   15.49    1.60
  -5  13   1    4.74    1.34
  -4  13   1   19.69    1.92
  -3  13   1   -0.92    1.11
  -2  13   1    7.10    1.32
  -1  13   1   10.41    1.42
   1  13  -1    9.75    1.42
   0  13   1    2.16    1.21
   0  13  -1    2.02    1.11
   1  13   1   23.05    1.98
  -1  13  -1   21.71    1.86
  -2  13  -1    1.99    1.10
  -3  13  -1   47.27    2.46
  -4  13  -1   -0.07    1.04
  -5  13  -1   18.26    1.82
  -6  13  -1    1.41    1.16
  -7  13  -1   22.34    2.22
  -8  13  -1    2.53    1.25
  -9  13  -1    4.15    1.36
  -7  14   1   -0.51    1.34
  -6  14   1    3.30    1.38
  -5  14   1    1.77    1.33
  -4  14   1    5.91    1.57
  -3  14   1   -0.20    1.23
  -2  14   1    7.25    1.43
  -1  14   1    2.07    1.29
   0  14   1   -0.77    1.23
   0  14  -1   -0.37    1.30
  -1  14  -1   -0.64    1.29
  -2  14  -1    4.98    1.39
  -3  14  -1   -0.90    1.30
  -4  14  -1    8.51    1.56
  -5  14  -1   -0.79    1.19
  -6  14  -1    1.98    1.28
  -7  14  -1    3.72    1.48
  -4  15   1   15.27    1.83
  -3  15   1   -0.24    1.34
  -2  15   1   27.66    2.62
  -1  15   1   -0.14    1.33
   0  15   1    8.30    1.55
   0  15  -1    7.55    1.49
  -1  15  -1   13.57    1.69
  -2  15  -1    0.82    1.35
  -3  15  -1    3.38    1.40
 -18   0   2   -1.72    1.32
 -17   0   2   -1.56    1.25
 -16   0   2   -0.99    1.27
  16   0  -2   -0.28    1.11
  15   0  -2   30.33    2.00
 -15   0   2   26.77    2.15
 -14   0   2    0.25    1.11
  14   0  -2    1.21    1.03
  13   0  -2   35.83    1.91
 -13   0   2   32.56    2.09
 -12   0   2   35.51    1.77
  12   0  -2   34.72    1.87
  11   0  -2  112.83    4.12
 -11   0   2  116.40    4.18
  10   0  -2   44.25    1.97
 -10   0   2   43.11    2.00
  -9   0   2   74.09    2.79
   9   0  -2   72.91    2.76
  -8   0   2  232.48    7.61
  -7   0   2    1.62    0.62
  -6   0   2   53.85    2.04
  -5   0   2   11.27    0.85
  -4   0   2  102.42    3.41
  -3   0   2    1.97    0.40
   2   0  -2   20.43    0.83
   1   0  -2  155.05    4.91
   0   0  -2  243.26    8.17
  -1   0  -2   21.26    0.75
  -2   0  -2   50.81    1.71
  -3   0  -2  338.44   10.70
  -4   0  -2   13.81    0.78
  -5   0  -2    0.46    0.45
  -6   0  -2   76.59    2.70
  -7   0  -2    8.63    0.89
  -8   0  -2   26.39    1.38
  -9   0  -2    2.65    0.81
 -12   0  -2   11.28    1.24
 -14   0  -2    3.80    1.17
 -15   0  -2   10.19    1.46
 -16   0  -2    2.27    1.33
 -17   0  -2   43.71    2.77
 -18  -1   2    8.81    1.63
 -18   1   2   13.18    1.75
 -17  -1   2    0.47    1.26
 -17   1   2   -0.11    1.28
  17   1  -2   -2.50    1.27
  16  -1  -2   -1.41    1.11
 -16  -1   2    1.60    1.23
 -16   1   2    0.96    1.18
  16   1  -2   -0.29    1.14
  15  -1  -2   -1.23    0.99
 -15  -1   2   -0.84    1.21
 -15   1   2    0.08    1.21
  15   1  -2   -1.26    1.00
  14  -1  -2    3.37    1.01
 -14  -1   2    1.90    1.22
 -14   1   2    4.17    1.23
  14   1  -2    5.50    1.11
 -13  -1   2    2.99    1.10
  13  -1  -2    3.45    0.96
  13   1  -2    3.18    1.00
 -13   1   2    3.33    1.15
 -12  -1   2    7.69    1.13
  12  -1  -2    8.48    1.02
 -12   1   2    8.26    0.99
  11  -1  -2    0.31    0.72
 -11  -1   2    0.78    0.88
 -11   1   2    0.98    0.88
  10  -1  -2   -0.14    0.70
 -10  -1   2    0.82    0.75
 -10   1   2    0.43    0.79
  -9  -1   2   18.24    1.25
   9  -1  -2   17.57    1.19
  -9   1   2   16.11    1.26
   8  -1  -2    0.88    0.59
  -8  -1   2    0.91    0.61
  -8   1   2    1.06    0.67
  -7  -1   2   33.66    1.53
   7  -1  -2   35.53    1.53
  -7   1   2   35.02    1.55
   6  -1  -2   14.47    0.95
  -6  -1   2   13.65    0.96
  -6   1   2   14.02    0.84
  -5  -1   2    3.34    0.55
   5  -1  -2    2.86    0.56
  -5   1   2    3.40    0.59
  -4  -1   2    9.81    0.74
   4  -1  -2   11.24    0.80
  -4   1   2   10.70    0.78
  -3  -1   2   -0.18    0.21
   3  -1  -2   -0.37    0.40
   3   1  -2    0.06    0.40
  -3   1   2    0.55    0.42
  -2  -1   2  144.82    4.48
   2  -1  -2  131.18    4.36
  -2   1   2  133.38    4.36
   2   1  -2  133.03    4.34
   1  -1  -2   38.76    1.37
   1  -1  -2   40.02    1.38
   1   1  -2   39.79    1.30
   0  -1  -2   13.35    0.62
   0  -1  -2   13.70    0.65
  -1  -1  -2  125.98    4.04
  -2  -1  -2   39.34    1.41
  -2   1  -2   39.82    1.33
  -2   1  -2   38.93    1.33
  -3  -1  -2   29.67    1.19
  -3   1  -2   30.09    1.13
  -4  -1  -2   17.32    0.92
  -4   1  -2   16.08    0.87
  -5  -1  -2    8.08    0.77
   5  -1   2   10.38    0.99
  -5   1  -2    8.24    0.81
   6  -1   2   72.14    2.44
  -6  -1  -2   68.85    2.51
  -6   1  -2   68.93    2.48
  -7  -1  -2    0.68    0.57
   7  -1   2    0.32    0.46
  -7   1  -2    1.08    0.56
  -8  -1  -2    0.15    0.60
   8  -1   2    0.30    0.60
  -8   1  -2    0.73    0.62
  -9  -1  -2    0.96    0.72
  -9   1  -2    1.35    0.72
 -10  -1  -2    3.28    0.86
 -10   1  -2    5.43    0.88
 -11  -1  -2    7.02    1.07
 -11   1  -2    9.34    1.07
 -12  -1  -2   -0.15    0.93
 -12   1  -2    0.08    1.01
  12   1   2    0.34    0.75
 -13  -1  -2    1.16    1.08
  13  -1   2    1.93    1.03
  13   1   2    1.93    0.96
 -13   1  -2    2.47    1.14
  14  -1   2   -1.88    0.85
 -14  -1  -2    1.62    1.16
 -14   1  -2   -0.12    1.18
  14   1   2   -0.32    0.90
 -15  -1  -2    6.03    1.34
 -15   1  -2    6.38    1.44
 -16  -1  -2    7.99    1.56
 -16   1  -2    7.84    1.61
 -17  -1  -2    2.75    1.41
 -17   1  -2    1.67    1.57
 -18  -2   2   -1.38    1.43
 -18   2   2    2.16    1.39
 -17  -2   2   15.03    1.68
  17   2  -2   12.24    1.66
 -17   2   2   12.86    1.67
  16  -2  -2    2.08    1.16
 -16  -2   2   -0.45    1.22
 -16   2   2    1.28    1.33
  16   2  -2   -1.02    1.17
  15  -2  -2    8.02    1.20
 -15  -2   2    8.69    1.44
  15   2  -2    9.52    1.34
 -15   2   2   10.02    1.44
 -14  -2   2    2.23    1.15
  14  -2  -2    0.79    0.91
 -14   2   2    0.45    1.15
 -13  -2   2   40.98    2.29
  13  -2  -2   42.04    2.11
 -13   2   2   44.41    2.30
  12  -2  -2    8.82    1.02
 -12  -2   2    7.70    1.13
 -12   2   2    8.17    1.16
  11  -2  -2   15.21    1.29
 -11  -2   2   16.27    1.40
 -11   2   2   13.33    1.16
 -10  -2   2  133.28    4.64
  10  -2  -2  134.56    4.66
 -10   2   2  135.31    4.65
  -9  -2   2    8.32    0.90
   9  -2  -2    6.54    0.82
  -9   2   2    8.73    0.92
  -8  -2   2   43.68    1.86
   8  -2  -2   43.36    1.83
  -8   2   2   44.51    1.88
  -7  -2   2   34.97    1.48
   7  -2  -2   36.85    1.56
  -7   2   2   36.39    1.61
  -6  -2   2  183.30    6.02
   6  -2  -2  183.11    6.01
  -6   2   2  185.21    6.03
  -5  -2   2    3.66    0.54
   5  -2  -2    2.90    0.55
  -5   2   2    3.00    0.59
   4  -2  -2   35.78    1.45
  -4  -2   2   36.62    1.38
  -4   2   2   36.50    1.46
   3  -2  -2  209.04    6.77
  -3   2   2  212.79    6.77
   3   2  -2  211.78    6.75
  -2  -2   2    1.75    0.35
   2  -2  -2    0.89    0.43
   2   2  -2    1.27    0.36
  -2   2   2    0.58    0.44
   1  -2  -2    1.39    0.39
  -1   2   2    0.94    0.42
   1   2  -2    0.71    0.26
   1   2  -2    0.66    0.25
   0  -2  -2    3.88    0.45
   0   2  -2    3.46    0.22
   0   2  -2    3.58    0.23
   0   2   2    4.31    0.46
  -1  -2  -2  274.45    8.41
  -1   2  -2  261.72    8.30
  -1   2  -2  257.02    8.30
  -2  -2  -2  132.25    4.27
  -2   2  -2  129.61    4.16
  -2   2  -2  130.97    4.17
  -3  -2  -2  811.71   25.59
  -3   2  -2  815.55   25.52
  -4  -2  -2  151.99    5.03
  -4   2  -2  154.29    4.96
  -4   2  -2  155.02    4.97
  -5  -2  -2  127.80    4.31
  -5   2  -2  129.75    4.24
  -6  -2  -2   27.77    1.34
  -6   2  -2   27.95    1.25
  -7  -2  -2   17.86    1.13
  -7   2  -2   16.12    1.11
  -8  -2  -2   21.80    1.35
  -8   2  -2   27.15    1.40
  -9  -2  -2    0.27    0.72
  -9   2  -2    0.25    0.66
 -10  -2  -2   17.13    1.42
 -10   2  -2   15.26    1.30
 -11  -2  -2   15.93    1.45
 -11   2  -2   15.20    1.41
 -12  -2  -2   24.94    1.81
 -12   2  -2   24.73    1.73
 -13  -2  -2    8.84    1.28
 -13   2  -2    9.07    1.24
 -14  -2  -2    2.73    1.16
 -14   2  -2    1.50    1.23
 -15  -2  -2   26.54    2.13
 -15   2  -2   26.46    2.08
 -16  -2  -2    1.68    1.33
 -16   2  -2    0.83    1.28
 -17  -2  -2    9.00    1.60
 -17   2  -2    8.14    1.59
 -17  -3   2    1.31    1.42
  17   3  -2   -1.69    1.37
 -17   3   2    2.23    1.42
 -16  -3   2   -0.25    1.24
 -16   3   2    1.09    1.30
  15  -3  -2    2.08    0.94
 -15  -3   2    3.27    1.30
 -15   3   2    1.21    1.23
 -14  -3   2   -1.10    1.07
  14  -3  -2    0.32    0.99
 -14   3   2    1.18    1.15
 -13  -3   2    2.98    1.06
  13  -3  -2    1.50    0.89
 -13   3   2    1.26    1.09
  12  -3  -2    4.53    0.88
 -12  -3   2    6.92    1.09
 -12   3   2    4.22    1.09
 -11  -3   2    2.01    0.91
  11  -3  -2    1.87    0.76
 -11   3   2    3.26    0.99
 -10  -3   2    0.19    0.76
  10  -3  -2   -0.72    0.66
 -10   3   2    0.13    0.81
  -9  -3   2    2.73    0.75
   9  -3  -2    1.51    0.66
  -9   3   2    1.86    0.76
  -8  -3   2   -0.94    0.61
   8  -3  -2   -0.22    0.56
  -8   3   2   -0.37    0.66
   7  -3  -2    8.62    0.88
  -7  -3   2    9.28    0.93
  -7   3   2    9.42    0.97
   6  -3  -2   21.83    1.14
  -6  -3   2   21.33    1.14
  -6   3   2   21.46    1.20
  -5  -3   2    0.89    0.48
   5  -3  -2   -0.10    0.49
  -5   3   2    1.00    0.56
   4  -3  -2  183.94    6.03
  -4   3   2  188.05    6.05
   3  -3  -2    0.58    0.47
  -3   3   2    0.97    0.51
   3   3  -2    0.94    0.43
   2  -3  -2   37.16    1.46
  -2   3   2   37.57    1.47
   2   3  -2   38.04    1.41
   1  -3  -2    2.42    0.49
   1   3  -2    2.54    0.35
   1   3  -2    1.92    0.34
  -1   3   2    2.51    0.50
   0  -3  -2    6.57    0.71
   0   3  -2    7.99    0.50
   0   3  -2    8.16    0.50
   0   3   2    9.03    0.75
  -1  -3  -2  119.87    3.92
  -1   3  -2  117.14    3.79
  -1   3  -2  117.64    3.79
   1   3   2  119.93    3.91
  -2  -3  -2   47.94    1.78
  -2   3  -2   48.02    1.62
  -2   3  -2   46.65    1.63
  -3  -3  -2   24.98    1.19
  -3   3  -2   25.76    1.03
  -3   3  -2   25.97    1.03
  -4  -3  -2    2.56    0.58
  -4   3  -2    2.60    0.46
  -4   3  -2    2.95    0.45
  -5  -3  -2   19.54    1.10
  -5   3  -2   17.65    0.96
  -5   3  -2   17.00    0.92
  -6  -3  -2    0.95    0.60
  -6   3  -2    0.66    0.49
  -6   3  -2   -0.08    0.50
  -7  -3  -2    1.95    0.67
  -7   3  -2    1.88    0.58
  -8  -3  -2    0.24    0.69
  -8   3  -2   -0.28    0.58
  -9  -3  -2    8.30    0.98
  -9   3  -2    9.99    1.01
 -10  -3  -2    1.19    0.83
 -10   3  -2    0.38    0.79
 -11  -3  -2    1.45    0.99
 -11   3  -2   -0.62    0.93
 -12  -3  -2    1.45    1.02
 -12   3  -2    0.15    0.96
 -13  -3  -2    0.43    1.11
 -13   3  -2    2.79    1.08
 -14  -3  -2    5.30    1.24
 -14   3  -2    5.19    1.19
 -15  -3  -2    1.56    1.27
 -15   3  -2    0.36    1.17
 -16  -3  -2   -0.11    1.31
 -16   3  -2   -0.19    1.25
 -17  -3  -2   -0.14    1.26
 -17   3  -2    0.38    1.34
 -17  -4   2   10.26    1.67
 -17   4   2   10.40    1.67
 -16  -4   2   -0.27    1.32
 -16   4   2   -2.63    1.22
 -15  -4   2   10.83    1.50
  15  -4  -2    8.25    1.15
 -15   4   2   12.61    1.55
 -14  -4   2    0.81    1.14
  14  -4  -2    0.93    0.99
 -14   4   2   -0.88    1.16
 -13  -4   2   21.60    1.79
  13  -4  -2   24.69    1.73
 -13   4   2   22.89    1.89
  12  -4  -2   32.26    1.77
 -12  -4   2   34.32    1.97
 -12   4   2   35.51    2.05
  11  -4  -2   37.43    1.91
 -11  -4   2   36.31    1.93
 -11   4   2   38.75    2.04
  10  -4  -2   80.90    2.97
 -10  -4   2   74.44    3.02
 -10   4   2   80.14    3.10
   9  -4  -2    1.89    0.72
  -9  -4   2    2.30    0.75
  -9   4   2    1.04    0.78
  -8  -4   2   59.55    2.36
   8  -4  -2   60.69    2.32
  -8   4   2   60.68    2.41
   7  -4  -2    1.47    0.62
  -7  -4   2    0.71    0.58
  -7   4   2    1.73    0.66
   6  -4  -2   12.21    0.93
  -6  -4   2   13.05    0.93
  -6   4   2   11.11    0.99
  -5  -4   2   54.23    2.03
   5  -4  -2   55.56    2.06
  -5   4   2   55.70    2.12
   4  -4  -2   18.25    1.02
  -4   4   2   18.06    1.08
   3  -4  -2   53.38    1.95
  -3  -4   2   49.71    1.98
  -3   4   2   53.76    1.99
   3   4  -2   55.10    1.97
   2  -4  -2   23.27    1.09
   2   4  -2   23.03    1.01
  -2   4   2   23.15    1.15
   1  -4  -2  187.38    6.09
   1   4  -2  187.18    6.03
  -1   4   2  187.04    6.10
   1   4  -2  190.68    6.03
   0  -4  -2    0.22    0.49
   0   4  -2    0.51    0.36
   0   4  -2    0.11    0.34
   0   4   2   -0.15    0.52
  -1  -4  -2   70.83    2.49
  -1   4  -2   71.15    2.41
   1   4   2   73.60    2.55
  -1   4  -2   73.83    2.42
  -2  -4  -2    3.22    0.58
  -2   4  -2    3.57    0.42
  -2   4  -2    3.34    0.41
  -3  -4  -2  274.12    8.80
  -3   4  -2  275.97    8.70
  -3   4  -2  270.83    8.71
  -4  -4  -2  206.05    6.71
  -4   4  -2  205.36    6.62
  -4   4  -2  205.43    6.61
  -5  -4  -2   76.08    2.77
  -5   4  -2   77.02    2.65
  -5   4  -2   76.19    2.65
  -6  -4  -2  417.33   13.19
  -6   4  -2  413.73   13.09
  -6   4  -2  402.11   13.09
  -7  -4  -2    2.56    0.72
  -7   4  -2    4.14    0.62
  -7   4  -2    2.57    0.61
  -8  -4  -2   70.27    2.68
  -8   4  -2   72.31    2.67
  -9  -4  -2    5.57    0.89
  -9   4  -2    6.47    0.86
 -10  -4  -2  153.43    5.40
 -10   4  -2  154.76    5.33
 -11  -4  -2   14.99    1.59
 -11   4  -2   13.46    1.31
 -12  -4  -2   15.42    1.64
 -12   4  -2   15.31    1.51
 -13  -4  -2   18.43    1.86
 -13   4  -2   17.26    1.64
 -14  -4  -2   13.20    1.51
 -14   4  -2   10.37    1.38
 -15  -4  -2    3.89    1.34
 -15   4  -2    5.62    1.43
 -16  -4  -2    6.22    1.42
 -16   4  -2    4.37    1.41
 -17  -5   2    0.75    1.52
 -17   5   2    1.54    1.40
 -16  -5   2    1.75    1.43
 -16   5   2    0.39    1.28
 -15  -5   2    8.59    1.50
 -15   5   2    9.20    1.48
 -14  -5   2   -1.24    1.09
  14  -5  -2   -0.48    0.96
 -14   5   2    0.14    1.16
 -13  -5   2    3.05    1.12
  13  -5  -2    2.54    0.96
 -13   5   2    3.90    1.17
  12  -5  -2    5.97    0.94
 -12   5   2    5.81    1.15
  11  -5  -2    2.49    0.78
 -11  -5   2    1.42    0.90
 -11   5   2    0.42    0.99
  10  -5  -2   15.70    1.22
 -10  -5   2   14.79    1.35
 -10   5   2   17.52    1.47
  -9  -5   2    1.30    0.75
   9  -5  -2    0.03    0.71
  -9   5   2    1.21    0.83
  -8  -5   2    0.62    0.68
   8  -5  -2    1.01    0.68
  -8   5   2   -0.56    0.72
  -7  -5   2   -0.22    0.58
   7  -5  -2    0.19    0.55
  -7   5   2   -0.38    0.67
  -6  -5   2    3.19    0.66
   6  -5  -2    3.17    0.60
  -6   5   2    3.86    0.73
   5  -5  -2    6.16    0.66
  -5   5   2    5.59    0.76
   4  -5  -2    4.53    0.65
  -4   5   2    3.49    0.68
  -3  -5   2    0.49    0.43
   3  -5  -2    0.17    0.48
   3   5  -2   -0.84    0.49
  -3   5   2   -0.08    0.57
   2  -5  -2   61.92    2.26
   2   5  -2   60.44    2.24
  -2   5   2   63.68    2.30
   2   5  -2   63.61    2.24
   1  -5  -2   14.94    0.94
   1   5  -2   14.87    0.82
   1   5  -2   14.87    0.81
  -1   5   2   14.88    1.00
   0  -5  -2    5.35    0.63
   0   5  -2    6.26    0.64
   0   5   2    6.09    0.69
   0   5  -2    5.82    0.55
  -1  -5  -2   44.08    1.74
  -1   5  -2   43.68    1.63
   1   5   2   44.34    1.77
  -1   5  -2   44.55    1.62
  -2  -5  -2   41.51    1.68
  -2   5  -2   40.90    1.56
  -2   5  -2   41.78    1.55
  -3  -5  -2   -0.23    0.55
  -3   5  -2    0.19    0.41
  -3   5  -2    0.68    0.44
  -4  -5  -2   46.58    1.89
  -4   5  -2   46.79    1.75
  -4   5  -2   46.23    1.74
  -5  -5  -2  136.76    4.64
  -5   5  -2  138.14    4.55
  -5   5  -2  134.33    4.51
  -6  -5  -2   46.32    2.01
  -6   5  -2   48.03    1.90
  -6   5  -2   48.37    1.91
  -7  -5  -2   45.19    2.02
  -7   5  -2   48.25    1.96
  -7   5  -2   46.49    1.95
  -8  -5  -2    6.29    0.92
  -8   5  -2    7.08    0.88
  -8   5  -2    5.67    0.80
  -9  -5  -2   10.82    1.08
  -9   5  -2   10.23    1.07
 -10  -5  -2   -1.17    0.86
 -10   5  -2    0.45    0.87
 -11  -5  -2    1.37    1.07
 -11   5  -2    3.32    1.03
 -12  -5  -2   10.11    1.37
 -12   5  -2    9.33    1.27
 -13  -5  -2   -1.35    1.12
 -13   5  -2   -0.53    0.99
 -14  -5  -2   -0.52    1.15
 -14   5  -2    0.42    1.10
 -15  -5  -2    0.77    1.27
 -15   5  -2    1.03    1.33
 -16  -5  -2    0.59    1.31
 -16   5  -2    2.86    1.36
 -16  -6   2    5.53    1.58
 -16   6   2    8.17    1.52
 -15  -6   2   29.25    2.25
 -15   6   2   25.88    2.23
 -14  -6   2    9.57    1.40
 -14   6   2    5.88    1.32
 -13  -6   2   18.97    1.92
 -13   6   2   16.52    1.65
 -12  -6   2    8.98    1.17
 -12   6   2    8.15    1.23
 -11  -6   2   44.64    2.19
  11  -6  -2   42.51    2.05
 -11   6   2   45.46    2.28
 -10  -6   2   50.70    2.27
  10  -6  -2   50.25    2.21
 -10   6   2   49.98    2.38
   9  -6  -2   28.82    1.50
  -9  -6   2   29.42    1.64
  -9   6   2   28.37    1.73
   8  -6  -2   90.17    3.29
  -8  -6   2   89.35    3.29
   7  -6  -2    1.85    0.60
  -7  -6   2    2.56    0.66
  -7   6   2   -0.16    0.74
   6  -6  -2   33.99    1.54
  -6  -6   2   35.27    1.54
  -6   6   2   34.52    1.67
   5  -6  -2   17.08    1.08
  -5   6   2   19.80    1.24
   4  -6  -2   50.34    1.93
  -4   6   2   48.39    2.01
   3  -6  -2  167.69    5.56
  -3   6   2  169.17    5.61
   2  -6  -2    7.44    0.82
  -2   6   2    5.56    0.74
   2   6  -2    6.99    0.77
   2   6  -2    6.82    0.76
   1  -6  -2  129.94    4.30
   1   6  -2  127.19    4.26
   1   6  -2  127.35    4.26
  -1   6   2  126.85    4.33
   0  -6  -2    6.28    0.69
   0   6   2    6.92    0.67
   0   6  -2    6.35    0.64
   0   6  -2    6.57    0.62
  -1  -6  -2  143.48    4.74
  -1   6  -2  140.63    4.66
  -1   6  -2  141.49    4.66
   1   6   2  140.18    4.76
  -2  -6  -2   38.35    1.65
  -2   6  -2   39.09    1.51
  -2   6  -2   38.51    1.55
  -3  -6  -2    8.11    0.79
  -3   6  -2    9.08    0.79
  -3   6  -2    8.38    0.81
  -4  -6  -2   72.54    2.75
  -4   6  -2   76.57    2.64
  -4   6  -2   74.37    2.63
  -5  -6  -2   14.65    0.96
  -5   6  -2    9.96    0.97
  -5   6  -2   13.35    0.98
  -6  -6  -2   18.27    1.32
  -6   6  -2   19.15    1.10
  -6   6  -2   18.06    1.10
  -7  -6  -2    2.98    0.85
  -7   6  -2    3.82    0.77
  -7   6  -2    2.91    0.74
  -8  -6  -2   99.09    3.66
  -8   6  -2   97.44    3.53
  -8   6  -2   96.64    3.57
  -9  -6  -2   -0.07    0.90
  -9   6  -2   -1.11    0.94
  -9   6  -2    1.45    0.78
 -10  -6  -2   -0.35    0.95
 -10   6  -2   -1.68    0.88
 -11  -6  -2    8.01    1.24
 -11   6  -2    5.87    1.13
 -12  -6  -2    2.42    1.23
 -12   6  -2    1.36    1.00
 -13  -6  -2   13.49    1.45
 -13   6  -2   11.35    1.44
 -14  -6  -2    4.78    1.32
 -14   6  -2    2.87    1.30
 -15  -6  -2   18.32    2.05
 -15   6  -2   19.34    2.02
 -16  -6  -2    1.84    1.40
 -16   6  -2    2.66    1.41
 -16   7   2   -0.80    1.33
 -15  -7   2    0.42    1.42
 -15   7   2    3.69    1.38
 -14  -7   2    5.48    1.34
 -14   7   2    8.91    1.43
 -13  -7   2    0.26    1.12
 -13   7   2    1.83    1.19
 -12  -7   2    3.04    1.05
 -12   7   2    2.88    1.14
 -11  -7   2    0.96    0.90
 -11   7   2   -0.19    0.99
  10  -7  -2   -0.50    0.56
 -10  -7   2    1.13    0.95
 -10   7   2    1.13    0.95
  -9  -7   2   13.94    1.26
  -9   7   2   12.41    1.32
  -8  -7   2   18.58    1.28
  -8   7   2   15.34    1.45
   7  -7  -2    6.37    0.80
  -7  -7   2    6.91    0.83
  -7   7   2    7.54    0.99
   6  -7  -2    4.87    0.70
  -6   7   2    6.02    0.90
   5  -7  -2    7.72    0.76
  -5   7   2    7.74    0.90
  -4  -7   2    1.55    0.64
   4  -7  -2    1.00    0.62
  -4   7   2    1.09    0.72
   3  -7  -2    3.40    0.62
  -3   7   2    2.84    0.72
   2  -7  -2   12.04    0.96
   2   7  -2   13.18    1.01
  -2   7   2   13.93    1.11
   2   7  -2   13.54    0.96
   1  -7  -2    6.57    0.76
   1   7  -2    6.46    0.67
  -1   7   2    6.51    0.79
   1   7  -2    5.45    0.65
   0  -7  -2    2.14    0.60
   0   7   2    2.48    0.71
   0   7  -2    2.03    0.54
   0   7  -2    2.11    0.58
  -1  -7  -2    8.57    0.93
  -1   7  -2   10.23    0.90
   1   7   2   10.06    1.07
  -1   7  -2   10.37    0.93
  -2  -7  -2   37.70    1.71
  -2   7  -2   40.71    1.64
  -2   7  -2   38.20    1.64
  -3  -7  -2    5.29    0.74
  -3   7  -2    4.48    0.59
  -3   7  -2    3.53    0.65
  -4  -7  -2    1.39    0.70
  -4   7  -2    1.90    0.63
  -4   7  -2    0.85    0.59
  -5  -7  -2    8.95    0.93
  -5   7  -2    6.99    0.74
  -5   7  -2    9.29    0.99
  -6  -7  -2   29.18    1.63
  -6   7  -2   28.36    1.44
  -6   7  -2   30.78    1.54
  -7  -7  -2    1.90    0.85
  -7   7  -2   -0.79    0.75
  -7   7  -2    0.26    0.78
  -8  -7  -2    1.57    0.90
  -8   7  -2    2.19    0.85
  -8   7  -2    2.82    0.89
  -9  -7  -2    5.55    1.04
  -9   7  -2    5.58    1.00
  -9   7  -2    4.51    1.15
 -10  -7  -2    0.00    1.00
 -10   7  -2    0.53    0.93
 -11  -7  -2    0.94    1.13
 -11   7  -2    0.29    0.92
 -12  -7  -2    3.07    1.18
 -12   7  -2    1.88    1.03
 -13  -7  -2   -0.93    1.09
 -13   7  -2    0.63    1.04
 -14  -7  -2    1.30    1.17
 -14   7  -2   -0.44    1.15
 -15  -7  -2   -2.27    1.26
 -15   7  -2   -0.64    1.25
 -15   8   2   14.79    1.77
 -14  -8   2    3.61    1.49
 -14   8   2    2.05    1.47
 -13  -8   2   14.88    1.64
 -13   8   2   14.03    1.60
 -12  -8   2    2.49    1.10
 -12   8   2    2.19    1.17
  11  -8  -2    2.80    1.75
 -11  -8   2    1.38    0.99
 -11   8   2    0.90    1.11
 -10  -8   2    1.38    0.88
 -10   8   2    2.32    1.09
  -9  -8   2    0.42    0.78
  -9   8   2   -0.73    0.96
  -8  -8   2   80.24    3.19
  -8   8   2   85.00    3.30
  -7  -8   2    0.03    0.62
   7  -8  -2    0.45    0.79
  -7   8   2    0.79    0.91
  -5  -8   2   34.77    2.32
  -5   8   2   32.09    1.78
   4  -8  -2  107.43    3.83
  -4   8   2  111.73    3.94
   3  -8  -2   19.67    1.24
  -3   8   2   17.58    1.35
   2  -8  -2   13.76    1.06
   2   8  -2   15.37    1.10
  -2   8   2   15.18    1.24
   1  -8  -2   58.99    2.34
  -1   8   2   57.43    2.38
   1   8  -2   59.85    2.28
   1   8  -2   60.53    2.30
   0  -8  -2    4.11    0.70
   0   8  -2    3.89    0.72
   0   8  -2    4.16    0.74
   0   8   2    3.30    0.82
  -1  -8  -2   11.17    1.13
   1   8   2   12.27    1.18
  -1   8  -2    9.73    0.97
  -1   8  -2    9.82    1.04
  -2  -8  -2    3.72    0.74
  -2   8  -2    4.64    0.72
  -2   8  -2    3.82    0.67
  -3  -8  -2    7.25    0.87
  -3   8  -2    6.98    0.76
  -3   8  -2    8.13    0.91
  -4  -8  -2   33.90    1.68
  -4   8  -2   31.93    1.53
  -4   8  -2   33.06    1.55
  -5  -8  -2   -0.80    0.72
  -5   8  -2    0.73    0.65
  -5   8  -2   -1.15    0.67
  -6  -8  -2   18.21    1.44
  -6   8  -2   17.32    1.26
  -6   8  -2   17.68    1.39
  -7  -8  -2    3.91    0.98
  -7   8  -2    3.27    0.80
  -7   8  -2    0.58    0.76
  -8  -8  -2   18.72    1.56
  -8   8  -2   17.73    1.47
  -8   8  -2   17.79    1.52
  -9  -8  -2    0.17    0.94
  -9   8  -2    0.27    1.19
  -9   8  -2   -0.45    0.92
 -10  -8  -2   44.06    2.35
 -10   8  -2   43.22    2.16
 -11  -8  -2    2.77    1.16
 -11   8  -2    0.16    0.91
 -12  -8  -2   18.30    1.98
 -12   8  -2   20.91    1.75
 -13  -8  -2    6.00    1.39
 -13   8  -2    7.40    1.39
 -14  -8  -2   21.28    2.18
 -14   8  -2   22.52    2.27
 -14   9   2    2.68    1.43
 -13   9   2    0.59    1.29
 -12  -9   2    0.31    1.06
 -12   9   2   -1.73    1.11
 -11  -9   2    5.11    1.06
 -11   9   2    4.76    1.25
 -10  -9   2    1.37    0.91
 -10   9   2    2.23    1.12
   9  -9  -2    0.31    1.12
  -9  -9   2    1.37    0.95
  -9   9   2    0.87    1.03
  -8  -9   2    7.16    0.96
  -8   9   2    5.83    1.12
  -7   9   2   28.81    1.84
  -6   9   2    4.55    1.04
  -5   9   2   17.55    1.52
  -4   9   2   12.24    1.34
   3  -9  -2    9.85    0.94
  -3   9   2    8.87    1.07
   2  -9  -2   16.04    1.16
  -2   9   2   17.66    1.42
   2   9  -2   17.50    1.27
   1  -9  -2    5.56    0.78
   1   9  -2    5.47    1.03
  -1   9   2    4.66    0.92
   1   9  -2    5.70    0.88
   0  -9  -2    4.46    0.83
   0   9  -2    4.17    0.80
   0   9  -2    3.91    0.76
   0   9   2    4.03    0.92
  -1  -9  -2   -0.28    0.67
  -1   9  -2   -0.33    0.67
  -1   9  -2   -0.81    0.73
   1   9   2   -0.51    0.81
  -2  -9  -2    6.58    0.88
  -2   9  -2    5.22    0.91
  -2   9  -2    6.72    0.83
  -3  -9  -2    1.04    0.77
  -3   9  -2    1.61    0.72
  -3   9  -2    0.43    0.69
  -4  -9  -2    1.33    0.79
  -4   9  -2    1.03    0.80
  -4   9  -2    1.06    0.75
  -5  -9  -2    0.49    0.81
  -5   9  -2   -0.21    0.81
  -5   9  -2    1.47    0.76
  -6  -9  -2    3.95    0.98
  -6   9  -2    2.02    0.80
  -6   9  -2    2.89    0.95
  -7  -9  -2    0.76    0.93
  -7   9  -2    0.22    0.86
  -7   9  -2   -0.74    0.89
  -8  -9  -2    0.27    0.91
  -8   9  -2    1.47    0.89
  -8   9  -2    0.89    0.99
  -9  -9  -2    5.55    1.17
  -9   9  -2    5.48    1.10
 -10  -9  -2    0.31    1.11
 -10   9  -2   -0.19    0.93
 -11  -9  -2    3.98    1.39
 -11   9  -2    3.55    1.13
 -12  -9  -2    8.74    1.56
 -12   9  -2    8.51    1.42
 -13  -9  -2    5.99    1.63
 -13   9  -2    6.66    1.33
 -14  -9  -2   -0.78    1.48
 -14   9  -2    0.30    1.26
 -13  10   2    2.52    1.45
 -12  10   2   -0.86    1.25
 -11  10   2   12.31    1.52
 -10 -10   2   22.98    1.63
 -10  10   2   23.25    2.17
  -9 -10   2    1.04    0.83
  -9  10   2    1.45    1.12
  -8  10   2   21.62    1.82
   7 -10  -2    6.66    1.23
  -7  10   2    6.57    1.29
   6 -10  -2   26.41    1.87
  -6  10   2   28.76    1.87
  -5  10   2    6.31    1.13
  -4  10   2   35.55    2.00
  -2  10   2   52.69    2.45
   2  10  -2   54.16    2.33
   1 -10  -2   65.42    2.60
   1  10  -2   66.95    2.75
  -1  10   2   65.55    2.80
   0 -10  -2    1.17    0.73
   0  10  -2    0.56    0.85
   0  10  -2   -0.81    1.74
   0  10   2    0.28    0.91
  -1 -10  -2   99.55    3.64
   1  10   2  102.57    3.81
  -1  10  -2   99.83    3.74
  -1  10  -2   96.98    3.64
  -2 -10  -2    1.53    0.76
  -2  10  -2    0.02    0.76
  -2  10  -2    0.60    0.93
  -3 -10  -2   26.87    1.59
  -3  10  -2   25.75    1.74
  -3  10  -2   25.23    1.66
  -4 -10  -2    4.94    0.94
  -4  10  -2    3.97    0.95
  -4  10  -2    3.94    0.99
  -5 -10  -2   51.53    2.42
  -5  10  -2   56.53    2.41
  -5  10  -2   53.73    2.36
  -6 -10  -2   33.81    2.06
  -6  10  -2   33.04    1.83
  -6  10  -2   33.09    1.89
  -7 -10  -2    1.19    0.94
  -7  10  -2    0.97    1.04
  -7  10  -2    1.21    0.99
  -8 -10  -2   32.17    2.02
  -8  10  -2   34.21    1.88
  -8  10  -2   26.17    2.31
  -9 -10  -2    2.92    1.29
  -9  10  -2    0.86    1.10
 -10 -10  -2   30.45    2.13
 -10  10  -2   23.49    2.04
 -11 -10  -2    4.61    1.34
 -11  10  -2    2.63    1.15
 -12 -10  -2    5.73    1.56
 -12  10  -2    1.51    1.21
 -13  10  -2    0.27    1.24
 -12  11   2   -2.29    1.26
 -11  11   2   -0.36    1.23
 -10  11   2    0.73    1.23
  -9  11   2    1.02    1.20
  -8  11   2    0.92    1.14
  -7  11   2   -1.13    1.04
  -6  11   2    1.35    1.05
  -5  11   2    2.16    1.09
  -4  11   2    1.18    1.04
  -3  11   2   -0.65    0.99
  -2  11   2    4.97    1.10
   1 -11  -2   -0.39    0.54
  -1  11   2    0.53    1.02
   1  11  -2   -0.18    0.97
   0 -11  -2    8.21    1.00
   0  11   2    8.39    1.19
   0  11  -2    7.28    1.12
  -1 -11  -2   23.72    1.62
  -1  11  -2   22.26    1.56
   1  11   2   19.59    1.79
  -2 -11  -2    1.42    0.80
  -2  11  -2    0.51    1.17
  -2  11  -2    0.73    0.88
  -3 -11  -2    5.37    0.94
  -3  11  -2    4.05    1.07
  -3  11  -2    5.06    1.11
  -4 -11  -2    5.85    1.04
  -4  11  -2    7.03    1.06
  -4  11  -2    7.51    1.18
  -5 -11  -2   -0.31    1.03
  -5  11  -2   -0.95    1.04
  -5  11  -2    0.62    0.88
  -6 -11  -2    1.15    1.03
  -6  11  -2    2.71    1.25
  -6  11  -2    1.23    0.92
  -7 -11  -2    6.20    1.18
  -7  11  -2    6.13    1.10
  -8 -11  -2   -0.72    1.07
  -8  11  -2    2.35    1.13
  -9 -11  -2   -0.43    1.20
  -9  11  -2    0.55    1.15
 -10 -11  -2    2.11    1.36
 -10  11  -2    1.34    1.24
 -11  11  -2    2.34    1.35
 -12  11  -2    1.70    1.29
 -11  12   2    6.95    1.54
 -10  12   2    9.41    1.57
  -9  12   2   -0.45    1.24
  -8  12   2   31.81    2.25
  -7  12   2    1.98    1.33
  -6  12   2   19.66    1.90
  -5  12   2    7.71    1.31
  -4  12   2   11.49    1.40
   3 -12  -2   -3.65    1.51
  -3  12   2    0.07    1.09
  -2  12   2    3.61    1.18
   1  12  -2    5.09    1.21
  -1  12   2    3.25    1.20
   0  12  -2    5.04    1.10
   0  12   2    7.95    1.28
  -1 -12  -2    4.11    0.83
  -1  12  -2    1.86    1.07
   1  12   2    4.14    1.20
  -2 -12  -2    0.75    0.94
  -2  12  -2    1.81    0.95
  -3 -12  -2   41.62    2.14
  -3  12  -2   44.85    2.34
  -4 -12  -2    6.61    1.12
  -4  12  -2    4.81    1.05
  -5 -12  -2   14.99    1.54
  -5  12  -2    8.81    1.24
  -6 -12  -2   15.77    1.70
  -6  12  -2   17.51    1.82
  -7 -12  -2    1.67    1.15
  -7  12  -2    4.04    1.24
  -8  12  -2   35.65    2.19
  -9  12  -2    2.76    1.23
 -10  12  -2    6.19    1.37
  -9  13   2    1.10    1.38
  -8  13   2    2.03    1.37
  -7  13   2    1.50    1.43
  -6  13   2    2.72    1.33
  -5  13   2    0.78    1.23
  -4  13   2    2.04    1.22
  -3  13   2    0.31    1.18
  -2  13   2    0.47    1.21
   1  13  -2    1.67    1.16
  -1  13   2   -1.82    1.12
   0  13  -2    9.44    1.28
   0  13   2    7.67    1.38
  -1  13  -2    0.63    1.06
  -2  13  -2    4.68    1.29
  -3  13  -2   -1.11    1.11
  -4  13  -2    1.40    1.20
  -5  13  -2    6.86    1.34
  -6  13  -2    3.93    1.32
  -7  13  -2    8.80    1.38
  -8  13  -2    0.05    1.31
  -9  13  -2    1.31    1.43
  -7  14   2    5.16    1.46
  -6  14   2    4.90    1.43
  -5  14   2    5.86    1.47
  -4  14   2    0.26    1.32
  -3  14   2    7.43    1.48
  -2  14   2    1.47    1.43
  -1  14   2    3.38    1.50
   0  14  -2    2.33    1.28
   0  14   2    0.59    1.41
  -1  14  -2   12.44    1.50
  -2  14  -2    0.82    1.15
  -3  14  -2    4.40    1.26
  -4  14  -2    4.54    1.26
  -5  14  -2   -1.00    1.32
  -6  14  -2    7.62    1.40
  -3  15   2   -2.07    1.40
  -2  15   2    1.35    1.46
  -1  15   2    2.25    1.42
   0  15  -2    5.63    1.53
  -1  15  -2   -1.62    1.34
  -2  15  -2    4.07    1.48
  -3  15  -2   -1.09    1.24
 -18   0   3   -0.77    1.38
  17   0  -3   -2.73    1.28
 -17   0   3    1.51    1.32
 -16   0   3   -0.25    1.23
  16   0  -3    0.72    1.17
 -15   0   3   -1.39    1.17
  15   0  -3    1.42    1.12
 -14   0   3   -1.31    1.07
  14   0  -3   -1.43    1.02
  13   0  -3    1.43    0.91
 -13   0   3    0.24    1.04
  12   0  -3   -0.40    0.87
 -12   0   3    0.95    0.92
 -11   0   3   -0.26    0.82
  11   0  -3   -0.01    0.82
 -10   0   3   -0.80    0.77
  10   0  -3    0.11    0.72
   9   0  -3    0.12    0.65
  -9   0   3   -0.51    0.68
   8   0  -3    0.25    0.63
  -8   0   3    0.50    0.61
  -7   0   3    0.11    0.60
  -6   0   3   -0.25    0.53
  -5   0   3   -0.38    0.47
  -4   0   3   -0.87    0.41
   3   0  -3   -0.79    0.40
  -2   0   3   -0.46    0.37
   2   0  -3   -0.58    0.30
   2   0  -3   -0.15    0.35
   1   0  -3    0.10    0.25
   1   0  -3    0.07    0.25
   0   0  -3   -0.24    0.20
  -1   0  -3   -0.08    0.23
  -2   0  -3   -0.18    0.29
  -3   0  -3   -0.47    0.35
  -4   0  -3   -0.18    0.42
  -5   0  -3   -0.27    0.43
  -6   0  -3   -0.05    0.48
  -7   0  -3   -0.01    0.53
   8   0   3   -0.72    0.58
  -8   0  -3   -0.10    0.60
  -9   0  -3   -0.24    0.73
   9   0   3    0.94    0.67
 -10   0  -3    0.43    0.77
  10   0   3    1.04    0.76
 -11   0  -3    0.88    0.86
  11   0   3   -0.31    0.78
 -12   0  -3    0.59    0.97
  12   0   3    0.44    0.96
 -13   0  -3   -1.01    0.96
 -14   0  -3    0.03    1.17
 -15   0  -3    1.61    1.18
 -16   0  -3    1.40    1.29
 -17   0  -3   -4.33    1.29
 -18  -1   3    3.13    1.57
 -18   1   3    3.29    1.48
 -17  -1   3   -2.89    1.15
  17  -1  -3   -1.65    1.84
  17   1  -3   -1.45    1.31
 -17   1   3   -1.67    1.25
  16  -1  -3    4.18    1.24
 -16  -1   3    3.52    1.28
  16   1  -3    3.76    1.28
 -16   1   3    5.95    1.38
  15  -1  -3    1.31    1.07
 -15  -1   3    1.06    1.21
  15   1  -3    2.44    1.16
 -15   1   3   -0.94    1.15
 -14  -1   3    1.40    1.14
  14  -1  -3    3.74    1.07
 -14   1   3    0.96    1.16
  14   1  -3    0.62    1.02
 -13  -1   3    1.23    1.03
  13  -1  -3    0.69    0.91
 -13   1   3    3.38    1.11
  13   1  -3    0.75    0.99
 -12  -1   3   53.41    2.45
  12  -1  -3   54.50    2.40
 -12   1   3   51.94    2.28
 -11  -1   3   -0.83    0.84
  11  -1  -3   -0.40    0.76
 -11   1   3    0.18    0.83
 -10  -1   3   85.40    3.29
  10  -1  -3   91.81    3.30
 -10   1   3   88.94    3.31
  -9  -1   3   30.58    1.57
   9  -1  -3   31.75    1.58
  -9   1   3   30.98    1.58
  -8  -1   3   35.27    1.59
   8  -1  -3   34.27    1.58
  -8   1   3   33.62    1.60
  -7  -1   3  134.17    4.52
   7  -1  -3  133.28    4.53
  -7   1   3  135.32    4.53
  -6  -1   3   19.54    1.07
   6  -1  -3   18.98    1.11
  -6   1   3   19.51    1.09
   5  -1  -3   49.05    1.82
  -5  -1   3   49.97    1.84
  -5   1   3   50.54    1.88
   4  -1  -3   35.48    1.44
  -4   1   3   35.54    1.42
   3  -1  -3  249.32    8.09
  -3   1   3  253.81    8.09
   3   1  -3  258.26    8.07
   2  -1  -3    0.77    0.41
   2  -1  -3    0.05    0.37
   2   1  -3    0.19    0.29
  -2   1   3    0.19    0.21
   1  -1  -3    2.24    0.37
   1  -1  -3    1.92    0.35
   1   1  -3    2.07    0.20
   0  -1  -3    0.70    0.35
   0  -1  -3    0.22    0.29
  -1  -1  -3   29.92    1.14
  -2  -1  -3  324.11   10.10
  -2   1  -3  321.92   10.03
  -2   1  -3  311.30   10.02
  -3  -1  -3   45.03    1.64
  -3   1  -3   45.30    1.58
  -4  -1  -3  151.13    4.91
  -4   1  -3  149.47    4.86
  -5  -1  -3    1.41    0.51
  -5   1  -3    0.99    0.47
  -6  -1  -3   63.21    2.28
  -6   1  -3   60.74    2.24
  -7  -1  -3   10.28    0.93
  -7   1  -3    8.29    0.85
  -8  -1  -3   14.13    1.10
  -8   1  -3   13.78    1.02
  -9  -1  -3   37.05    1.87
  -9   1  -3   45.00    1.87
 -10  -1  -3    0.33    0.82
 -10   1  -3    0.34    0.85
 -11  -1  -3    7.38    1.05
 -11   1  -3    5.45    0.99
 -12  -1  -3    1.64    0.98
 -12   1  -3    2.10    0.96
 -13  -1  -3   25.71    1.87
 -13   1  -3   24.41    1.83
 -14  -1  -3   -0.86    1.07
 -14   1  -3    1.07    1.07
 -15  -1  -3   28.61    2.25
 -15   1  -3   37.92    2.27
 -16  -1  -3   11.96    1.73
 -16   1  -3   14.02    1.77
 -17  -1  -3    9.94    1.61
 -17   1  -3    7.19    1.69
 -18  -2   3    5.01    1.52
 -18   2   3    3.14    1.49
 -17  -2   3    1.55    1.35
  17   2  -3    1.02    1.32
 -17   2   3    2.08    1.39
 -16  -2   3    0.84    1.29
  16  -2  -3    2.50    1.28
 -16   2   3    2.03    1.38
  16   2  -3    0.19    1.21
  15  -2  -3    0.11    1.02
 -15  -2   3   -0.14    1.20
 -15   2   3    1.95    1.25
  15   2  -3    3.07    1.26
 -14  -2   3    9.86    1.38
  14  -2  -3    9.89    1.19
 -14   2   3    8.15    1.36
  13  -2  -3   -0.84    0.82
 -13  -2   3    0.88    1.06
 -13   2   3   -0.17    1.01
 -12  -2   3   11.20    1.25
  12  -2  -3   13.16    1.21
 -12   2   3   14.34    1.47
  11  -2  -3    1.54    0.80
 -11  -2   3    2.43    0.86
 -11   2   3    3.36    0.90
 -10  -2   3    0.57    0.79
  10  -2  -3    0.80    0.73
 -10   2   3    0.22    0.80
   9  -2  -3   26.44    1.43
  -9  -2   3   25.02    1.41
  -9   2   3   24.00    1.45
  -8  -2   3    3.54    0.69
   8  -2  -3    3.85    0.71
  -8   2   3    4.18    0.75
  -7  -2   3    3.43    0.63
   7  -2  -3    3.13    0.65
  -7   2   3    3.65    0.69
   6  -2  -3   23.23    1.20
  -6  -2   3   22.51    1.14
  -6   2   3   23.21    1.23
   5  -2  -3   -0.02    0.53
  -5  -2   3   -0.03    0.36
  -5   2   3   -0.28    0.53
   4  -2  -3   16.01    0.95
   4   2  -3   16.23    0.88
  -4   2   3   15.38    0.95
   3  -2  -3   12.48    0.83
  -3  -2   3   11.79    0.79
  -3   2   3   11.82    0.70
   3   2  -3   12.82    0.71
   2  -2  -3   11.51    0.76
   2   2  -3   10.95    0.60
  -2   2   3   11.04    0.78
   1  -2  -3  195.68    6.18
   1   2  -3  184.49    6.06
  -1   2   3  199.63    6.17
   1   2  -3  189.98    6.06
   0  -2  -3  387.87   11.89
   0   2   3  363.83   11.87
  -1  -2  -3   14.43    0.79
  -2  -2  -3   63.08    2.19
  -2   2  -3   62.08    2.01
  -2   2  -3   62.85    2.02
  -3  -2  -3   -0.05    0.45
  -3   2  -3    0.07    0.28
  -3   2  -3    0.26    0.29
  -4  -2  -3    6.73    0.62
  -4   2  -3    7.09    0.59
  -4   2  -3    6.70    0.61
  -5  -2  -3    1.06    0.55
  -5   2  -3    1.80    0.45
  -6  -2  -3    0.05    0.54
  -6   2  -3   -0.99    0.50
  -7  -2  -3   24.74    1.34
  -7   2  -3   25.12    1.23
  -8  -2  -3    1.16    0.68
  -8   2  -3    1.02    0.60
  -9  -2  -3    0.00    0.71
  -9   2  -3    0.92    0.67
 -10  -2  -3   -0.04    0.83
 -10   2  -3   -1.18    0.70
 -11  -2  -3    2.69    0.98
 -11   2  -3    3.71    0.91
 -12  -2  -3   -0.53    0.94
 -12   2  -3   -0.90    0.86
 -13  -2  -3   18.29    1.78
 -13   2  -3   17.82    1.65
 -14  -2  -3    5.14    1.33
 -14   2  -3    3.38    1.16
  14   2   3    5.23    0.96
 -15  -2  -3    2.03    1.30
 -15   2  -3   -0.50    1.11
 -16  -2  -3    2.32    1.33
 -16   2  -3   -0.54    1.24
  18   3  -3   -0.25    1.43
 -17  -3   3    9.40    1.74
  17   3  -3    8.57    1.55
 -17   3   3    9.30    1.69
 -16  -3   3    6.92    1.47
  16  -3  -3    6.86    1.27
 -16   3   3    6.51    1.45
 -15  -3   3    6.39    1.35
  15  -3  -3    7.21    1.29
 -15   3   3    6.76    1.42
 -14  -3   3    8.40    1.33
  14  -3  -3    8.76    1.18
 -14   3   3    8.61    1.40
 -13  -3   3   24.65    1.80
  13  -3  -3   24.42    1.68
 -13   3   3   23.28    1.89
  12  -3  -3   74.70    2.94
 -12  -3   3   76.70    3.03
 -12   3   3   68.10    3.05
 -11  -3   3    3.12    0.90
  11  -3  -3    2.26    0.81
 -11   3   3    3.25    0.99
 -10  -3   3  129.05    4.49
  10  -3  -3  125.11    4.48
 -10   3   3  129.32    4.54
  -9  -3   3   23.85    1.35
   9  -3  -3   20.25    1.34
  -9   3   3   21.62    1.43
  -8  -3   3  119.40    4.12
   8  -3  -3  120.19    4.14
  -8   3   3  119.38    4.17
  -7  -3   3   10.74    0.92
   7  -3  -3   10.51    0.96
  -7   3   3   12.18    1.03
   6  -3  -3  120.02    4.10
  -6  -3   3  119.65    4.07
  -6   3   3  123.12    4.12
   5  -3  -3  152.36    5.03
  -5   3   3  151.37    5.04
  -4  -3   3   86.08    2.88
   4  -3  -3   84.32    2.95
   4   3  -3   84.12    2.90
  -4   3   3   86.06    2.96
   3  -3  -3   17.29    0.97
  -3   3   3   17.71    0.88
   3   3  -3   17.15    0.90
   2  -3  -3   16.56    0.85
   2   3  -3   18.78    0.81
  -2   3   3   17.77    0.99
   1  -3  -3   82.43    2.79
   1   3  -3   83.62    2.68
  -1   3   3   80.69    2.78
   1   3  -3   84.00    2.68
   0  -3  -3  138.42    4.42
   0   3  -3  133.51    4.26
   0   3   3  138.51    4.41
   0   3  -3  128.47    4.25
  -1  -3  -3  229.94    7.13
  -1   3  -3  218.78    6.96
  -1   3  -3  215.90    6.96
  -2  -3  -3   82.60    2.87
  -2   3  -3   84.39    2.70
  -2   3  -3   84.08    2.70
  -3  -3  -3  100.92    3.42
  -3   3  -3  100.37    3.27
  -3   3  -3  100.47    3.26
  -4  -3  -3  309.27    9.83
  -4   3  -3  305.18    9.71
  -4   3  -3  304.18    9.72
  -5  -3  -3   25.31    1.28
  -5   3  -3   25.16    1.12
  -5   3  -3   24.76    1.10
  -6  -3  -3  185.45    6.15
  -6   3  -3  185.67    6.06
  -7  -3  -3   39.93    1.65
  -7   3  -3   37.49    1.61
  -8  -3  -3    2.62    0.77
  -8   3  -3    2.92    0.65
  -9  -3  -3   12.11    1.27
  -9   3  -3   12.52    1.25
 -10  -3  -3   -0.35    0.86
 -10   3  -3    0.95    0.77
 -11  -3  -3   46.68    2.31
 -11   3  -3   48.38    2.23
 -12  -3  -3   -1.83    0.96
 -12   3  -3   -0.16    0.92
 -13  -3  -3    1.36    1.10
 -13   3  -3    1.57    1.13
 -14  -3  -3    1.33    1.17
 -14   3  -3    2.35    1.26
 -15  -3  -3    6.21    1.39
 -15   3  -3    5.07    1.27
 -16  -3  -3    1.42    1.33
 -16   3  -3   -0.21    1.24
 -17  -4   3   -2.04    1.40
 -17   4   3    2.67    1.45
 -16  -4   3    2.72    1.44
 -16   4   3    2.62    1.38
 -15  -4   3    4.56    1.31
  15  -4  -3    0.62    1.15
 -15   4   3    0.83    1.22
 -14  -4   3   -3.31    1.05
  14  -4  -3    1.27    0.96
 -14   4   3   -0.48    1.13
 -13  -4   3    0.93    0.99
  13  -4  -3    0.35    0.85
 -13   4   3    1.89    1.13
  12  -4  -3    2.54    0.89
 -12  -4   3    2.64    0.92
 -12   4   3    1.09    1.07
 -11  -4   3    8.14    1.00
  11  -4  -3    7.96    0.98
 -11   4   3    5.90    1.08
 -10  -4   3    1.17    0.79
  10  -4  -3    1.61    0.75
 -10   4   3    0.88    0.87
   9  -4  -3    0.62    0.69
  -9  -4   3    0.98    0.71
  -9   4   3    1.25    0.77
  -8  -4   3    1.38    0.70
   8  -4  -3    1.33    0.66
  -8   4   3    1.91    0.76
   7  -4  -3    0.08    0.59
  -7  -4   3    0.15    0.53
  -7   4   3   -1.09    0.62
   6  -4  -3    1.45    0.59
  -6  -4   3    0.44    0.37
  -6   4   3    0.78    0.64
   5  -4  -3   14.11    0.98
  -5   4   3   12.38    1.03
   4  -4  -3   13.28    0.95
  -4  -4   3   13.32    0.97
  -4   4   3   12.31    1.00
   4   4  -3   14.07    0.88
   3  -4  -3   -0.52    0.49
  -3   4   3   -0.07    0.56
   3   4  -3   -0.07    0.40
   2  -4  -3   28.61    1.29
  -2   4   3   27.94    1.29
   2   4  -3   27.67    1.14
   1  -4  -3    0.13    0.50
  -1   4   3    0.58    0.54
   1   4  -3    0.84    0.35
   1   4  -3    0.21    0.34
   0  -4  -3    0.57    0.50
   0   4  -3    0.54    0.29
   0   4  -3    0.31    0.30
   0   4   3   -0.22    0.52
  -1  -4  -3    4.89    0.62
  -1   4  -3    4.60    0.47
  -1   4  -3    4.83    0.47
   1   4   3    4.91    0.61
  -2  -4  -3    1.43    0.54
  -2   4  -3    1.01    0.33
  -2   4  -3    1.38    0.32
  -3  -4  -3   31.29    1.42
  -3   4  -3   31.96    1.21
  -3   4  -3   32.06    1.22
  -4  -4  -3    0.76    0.57
  -4   4  -3    0.45    0.40
  -4   4  -3   -0.07    0.38
  -5  -4  -3  122.22    4.21
  -5   4  -3  123.90    4.07
  -5   4  -3  122.87    4.09
  -6  -4  -3  119.83    4.22
  -6   4  -3  125.26    4.10
  -6   4  -3  120.89    4.09
  -7  -4  -3    0.36    0.68
  -7   4  -3    1.12    0.54
  -7   4  -3    1.07    0.61
  -8  -4  -3    2.92    0.82
  -8   4  -3    3.98    0.70
  -9  -4  -3   15.89    1.38
  -9   4  -3   13.73    1.19
 -10  -4  -3   20.18    1.58
 -10   4  -3   18.55    1.53
 -11  -4  -3    1.68    0.97
 -11   4  -3   -0.12    0.85
 -12  -4  -3   -0.78    1.07
 -12   4  -3    0.81    1.05
 -13  -4  -3    2.84    1.17
 -13   4  -3   -0.66    0.97
 -14  -4  -3   -0.52    1.17
 -14   4  -3   -1.04    1.03
 -15  -4  -3    0.33    1.24
 -15   4  -3   -0.47    1.28
 -16  -4  -3    3.90    1.43
 -16   4  -3    2.97    1.37
 -17  -5   3   19.93    2.23
 -16  -5   3    5.73    1.56
 -16   5   3    7.78    1.48
 -15  -5   3    9.41    1.49
 -15   5   3   13.14    1.58
 -14  -5   3   16.39    1.78
  14  -5  -3   15.21    1.53
 -14   5   3   14.77    1.56
 -13  -5   3    3.84    1.08
  13  -5  -3    3.70    0.98
 -13   5   3    1.49    1.17
  12  -5  -3   27.40    1.79
 -12  -5   3   23.66    1.70
 -12   5   3   23.29    1.86
  11  -5  -3    0.89    0.77
 -11  -5   3    1.02    0.92
 -11   5   3   -0.23    0.93
  10  -5  -3   61.40    2.43
 -10  -5   3   64.01    2.45
 -10   5   3   47.06    2.47
   9  -5  -3   28.50    1.56
  -9  -5   3   28.39    1.53
  -9   5   3   29.92    1.69
   8  -5  -3   13.52    1.16
  -8  -5   3   15.15    1.12
  -8   5   3   15.06    1.27
  -7  -5   3   34.74    1.52
   7  -5  -3   35.49    1.61
  -7   5   3   33.08    1.69
   6  -5  -3   16.95    1.12
  -6   5   3   17.93    1.23
   5  -5  -3   87.19    3.08
  -5  -5   3   87.27    3.04
  -5   5   3   85.27    3.10
   4  -5  -3    5.98    0.60
  -4   5   3    6.14    0.75
   4   5  -3    4.52    0.63
   3  -5  -3  135.57    4.61
  -3   5   3  138.59    4.64
   3   5  -3  139.30    4.56
   2  -5  -3   56.96    2.13
   2   5  -3   56.40    2.02
   2   5  -3   56.33    2.03
  -2   5   3   55.92    2.15
   1  -5  -3   85.79    2.96
   1   5  -3   83.71    2.84
  -1   5   3   82.90    2.97
   1   5  -3   84.59    2.84
   0  -5  -3    0.20    0.54
   0   5  -3    0.01    0.36
   0   5   3    0.98    0.57
   0   5  -3   -0.26    0.38
  -1  -5  -3   80.09    2.86
   1   5   3   82.42    2.88
  -1   5  -3   79.95    2.70
  -1   5  -3   81.16    2.70
  -2  -5  -3   66.66    2.48
  -2   5  -3   68.14    2.31
  -2   5  -3   67.53    2.30
  -3  -5  -3    0.65    0.58
  -3   5  -3    0.75    0.40
  -3   5  -3    0.46    0.39
  -4  -5  -3   20.02    1.24
  -4   5  -3   22.68    1.04
  -4   5  -3   21.68    1.03
  -5  -5  -3    7.77    0.85
  -5   5  -3    7.52    0.74
  -5   5  -3    7.63    0.79
  -6  -5  -3  157.27    5.36
  -6   5  -3  156.77    5.22
  -6   5  -3  159.13    5.23
  -7  -5  -3   15.22    1.31
  -7   5  -3   17.09    1.13
  -7   5  -3   15.77    1.13
  -8  -5  -3  125.81    4.62
  -8   5  -3  135.51    4.52
  -8   5  -3  131.15    4.49
  -9  -5  -3   41.07    2.12
  -9   5  -3   44.41    2.01
 -10  -5  -3    2.17    1.02
 -10   5  -3    1.62    0.82
 -11  -5  -3   15.28    1.44
 -11   5  -3   16.15    1.45
 -12  -5  -3    0.50    1.12
 -12   5  -3    0.30    0.93
 -13  -5  -3   32.93    2.26
 -13   5  -3   35.49    2.20
 -14  -5  -3   -0.14    1.28
 -14   5  -3    2.08    1.10
 -15  -5  -3   10.93    1.58
 -15   5  -3   12.30    1.63
 -16  -5  -3    6.81    1.48
 -16   5  -3    4.18    1.41
 -16  -6   3    1.36    1.37
 -16   6   3    0.46    1.49
 -15  -6   3    4.00    1.34
 -15   6   3    0.15    1.40
  14  -6  -3    0.80    1.11
 -14  -6   3    1.74    1.16
 -14   6   3    3.65    1.29
  13  -6  -3    3.47    1.02
 -13  -6   3    1.34    1.02
 -13   6   3    1.02    1.20
  12  -6  -3   17.50    1.47
 -12  -6   3   18.19    1.75
 -12   6   3   19.53    1.78
 -11  -6   3    5.30    1.04
  11  -6  -3    3.89    0.87
 -11   6   3    3.09    1.10
 -10  -6   3    2.11    0.79
  10  -6  -3   -0.13    0.72
 -10   6   3   -0.34    0.94
   9  -6  -3    1.17    0.73
  -9  -6   3    0.85    0.70
  -9   6   3    0.48    0.92
  -8  -6   3   15.67    1.16
   8  -6  -3   16.82    1.22
  -8   6   3   17.28    1.42
   7  -6  -3   30.46    1.55
  -7   6   3   31.88    1.67
   6  -6  -3    1.28    0.63
  -6   6   3    0.78    0.74
   5  -6  -3    0.73    0.59
  -5  -6   3    0.50    0.62
  -5   6   3   -1.02    0.67
   4  -6  -3   20.79    1.18
   4   6  -3   18.79    1.14
  -4   6   3   19.85    1.27
   3  -6  -3    6.35    0.72
   3   6  -3    6.59    0.68
  -3   6   3    6.29    0.78
   2  -6  -3   13.54    1.00
   2   6  -3   14.98    0.93
   2   6  -3   12.99    0.91
  -2   6   3   14.48    1.09
   1  -6  -3   18.98    1.12
  -1   6   3   20.25    1.20
   1   6  -3   18.77    1.00
   1   6  -3   19.40    1.01
   0  -6  -3   26.07    1.34
   0   6  -3   28.65    1.19
   0   6  -3   27.22    1.17
   0   6   3   26.67    1.38
  -1  -6  -3   -0.20    0.57
   1   6   3    0.62    0.63
  -1   6  -3    0.16    0.45
  -1   6  -3    0.56    0.42
  -2  -6  -3    5.47    0.73
  -2   6  -3    5.33    0.54
  -2   6  -3    6.09    0.67
  -3  -6  -3    1.41    0.64
  -3   6  -3    1.35    0.49
  -3   6  -3    1.61    0.43
  -4  -6  -3    6.23    0.80
  -4   6  -3    6.03    0.58
  -4   6  -3    4.96    0.60
  -5  -6  -3    0.87    0.68
  -5   6  -3    0.50    0.47
  -5   6  -3   -0.06    0.49
  -6  -6  -3   19.48    1.39
  -6   6  -3   19.33    1.17
  -6   6  -3   20.08    1.17
  -7  -6  -3    6.16    0.94
  -7   6  -3    4.83    0.76
  -7   6  -3    4.52    0.77
  -8  -6  -3  102.37    3.78
  -8   6  -3   99.43    3.66
  -8   6  -3  104.06    3.65
  -9  -6  -3   35.06    1.97
  -9   6  -3   34.19    1.83
  -9   6  -3   34.35    1.87
 -10  -6  -3    1.08    1.02
 -10   6  -3    2.01    0.84
 -11  -6  -3    2.19    1.15
 -11   6  -3   -0.22    0.86
 -12  -6  -3    1.75    1.19
 -12   6  -3    1.97    0.97
 -13  -6  -3    0.20    1.19
 -13   6  -3    0.95    1.12
 -14  -6  -3   -0.38    1.20
 -14   6  -3    0.70    1.21
 -15  -6  -3    0.08    1.26
 -15   6  -3    1.15    1.28
 -16   7   3    6.61    1.54
 -15   7   3   12.86    1.76
 -14  -7   3   22.06    1.96
 -14   7   3   24.16    2.13
 -13  -7   3    0.68    1.05
  13  -7  -3    1.90    1.03
 -13   7   3    2.19    1.22
  12  -7  -3   15.25    1.44
 -12  -7   3   19.49    1.63
 -12   7   3   21.04    2.05
  11  -7  -3    7.51    1.11
 -11  -7   3   10.75    1.12
 -11   7   3    8.98    1.31
  10  -7  -3    6.17    0.91
 -10  -7   3    4.36    0.91
 -10   7   3    5.02    1.16
   9  -7  -3   -0.10    0.69
  -9  -7   3    1.50    0.77
  -9   7   3    0.34    0.99
   8  -7  -3   70.16    2.67
  -8   7   3   65.06    2.79
   7  -7  -3   64.87    2.65
  -7   7   3   67.60    2.73
  -6  -7   3    5.08    0.74
   6  -7  -3    5.64    0.79
  -6   7   3    4.64    0.92
   5  -7  -3  110.29    3.89
  -5   7   3  111.61    3.97
   4  -7  -3   43.37    1.90
  -4   7   3   47.23    2.01
   3  -7  -3  139.68    4.79
   3   7  -3  140.91    4.75
  -3   7   3  143.57    4.86
   2  -7  -3   60.34    2.33
  -2   7   3   61.14    2.40
   2   7  -3   60.37    2.29
   2   7  -3   61.18    2.29
   1  -7  -3   53.90    2.16
   1   7  -3   54.52    2.08
  -1   7   3   55.08    2.22
   1   7  -3   55.72    2.04
   0  -7  -3   84.50    3.11
   0   7  -3   87.40    3.01
   0   7  -3   86.52    3.02
   0   7   3   88.50    3.17
  -1  -7  -3    4.51    0.70
   1   7   3    4.21    0.80
  -1   7  -3    4.64    0.60
  -1   7  -3    2.89    0.55
  -2  -7  -3   48.05    1.91
  -2   7  -3   36.31    1.71
  -2   7  -3   47.71    1.74
  -3  -7  -3   13.49    1.13
  -3   7  -3   12.16    0.93
  -3   7  -3   12.33    0.92
  -4  -7  -3   63.58    2.50
  -4   7  -3   63.95    2.36
  -4   7  -3   62.14    2.33
  -5  -7  -3    0.96    0.77
  -5   7  -3    1.65    0.58
  -5   7  -3    1.53    0.62
  -6  -7  -3   14.56    1.39
  -6   7  -3   16.35    1.16
  -6   7  -3   16.23    1.18
  -7  -7  -3    0.21    0.87
  -7   7  -3    0.60    0.64
  -7   7  -3   -0.54    0.63
  -8  -7  -3  158.71    5.50
  -8   7  -3  157.93    5.35
  -8   7  -3  150.40    5.34
  -9  -7  -3   66.01    2.83
  -9   7  -3   63.03    2.70
  -9   7  -3   61.34    2.58
 -10  -7  -3   40.55    2.46
 -10   7  -3   57.25    2.45
 -10   7  -3   54.04    2.38
 -11  -7  -3   51.77    2.63
 -11   7  -3   52.30    2.42
 -12  -7  -3    1.15    1.13
 -12   7  -3    0.42    0.99
 -13  -7  -3   20.67    2.04
 -13   7  -3   20.15    1.82
 -14  -7  -3    1.04    1.24
 -14   7  -3    1.22    1.17
 -15  -7  -3    6.09    1.51
 -15   7  -3    6.41    1.57
 -15   8   3    2.69    1.59
 -14   8   3   -0.49    1.29
 -13  -8   3    9.22    1.38
 -13   8   3    5.87    1.45
  12  -8  -3    0.34    0.70
 -12  -8   3    4.95    1.12
 -12   8   3    2.67    1.20
 -11  -8   3    0.54    0.99
  11  -8  -3    0.28    0.84
 -11   8   3    0.44    1.10
 -10  -8   3    0.09    0.96
  10  -8  -3    0.94    0.89
 -10   8   3    1.94    1.09
   9  -8  -3    2.08    0.81
  -9  -8   3    1.00    0.73
  -9   8   3    4.49    1.10
   8  -8  -3    5.60    0.96
  -8   8   3    2.76    1.05
  -7  -8   3    1.09    0.95
   7  -8  -3    1.37    0.73
  -7   8   3   -1.08    0.87
   6  -8  -3   41.37    1.88
  -6   8   3   41.31    2.07
   5  -8  -3    1.29    0.70
  -5   8   3    1.91    0.84
   4  -8  -3   -0.67    0.63
  -4   8   3   -0.50    0.80
   3  -8  -3   19.50    1.25
   3   8  -3   19.82    1.29
  -3   8   3   21.20    1.43
   2  -8  -3    0.16    0.70
  -2   8   3    0.63    0.76
   2   8  -3    0.33    0.58
   2   8  -3    1.87    0.70
   1  -8  -3    6.79    0.84
   1   8  -3    7.47    0.81
  -1   8   3    8.95    0.96
   1   8  -3    6.61    0.77
   0  -8  -3    0.91    0.66
   0   8   3    1.02    0.80
   0   8  -3   -0.06    0.51
   0   8  -3    0.28    0.54
  -1  -8  -3    5.31    0.81
  -1   8  -3    5.66    0.73
   1   8   3    6.50    0.93
  -1   8  -3    4.93    0.69
  -2  -8  -3    4.15    0.78
  -2   8  -3    2.78    0.67
  -2   8  -3    2.21    0.58
  -3  -8  -3    1.70    0.76
  -3   8  -3    1.56    0.62
  -3   8  -3    1.33    0.61
  -4  -8  -3    8.94    0.98
  -4   8  -3    8.12    0.84
  -4   8  -3    7.81    0.80
  -5  -8  -3    8.39    1.03
  -5   8  -3    7.00    0.85
  -5   8  -3    7.15    0.81
  -6  -8  -3    5.91    1.01
  -6   8  -3    5.83    0.83
  -6   8  -3    5.92    0.88
  -7  -8  -3    3.47    1.03
  -7   8  -3    1.02    0.83
  -7   8  -3    3.67    0.83
  -8  -8  -3   16.45    1.61
  -8   8  -3   14.94    1.43
  -8   8  -3   12.60    1.43
  -9  -8  -3    1.93    1.09
  -9   8  -3    1.67    0.93
  -9   8  -3    1.59    1.01
 -10  -8  -3    2.12    1.10
 -10   8  -3   -0.32    1.13
 -10   8  -3    1.40    0.98
 -11  -8  -3    0.41    1.11
 -11   8  -3    0.38    0.93
 -12  -8  -3    0.61    1.15
 -12   8  -3    0.45    1.01
 -13  -8  -3    4.04    1.24
 -13   8  -3    3.75    1.27
 -14  -8  -3   -0.08    1.30
 -14   8  -3   -0.40    1.27
 -14   9   3   12.25    1.66
 -13   9   3    1.47    1.34
 -12   9   3    8.65    1.48
 -11  -9   3    1.68    0.98
 -11   9   3    0.81    1.15
   9  -9  -3   -1.45    0.70
  -9   9   3    4.38    1.16
  -8  -9   3   37.61    2.20
   8  -9  -3   40.89    2.01
  -8   9   3   44.37    2.28
   7  -9  -3    3.61    0.81
  -7   9   3    3.39    1.07
   6  -9  -3   44.20    2.00
  -6   9   3   43.26    2.22
   5  -9  -3  166.20    5.65
  -5   9   3  164.67    5.76
   4  -9  -3   27.78    1.59
  -4   9   3   25.85    1.72
   3  -9  -3   49.60    2.20
  -3   9   3   50.67    2.31
   2  -9  -3    6.52    0.84
   2   9  -3    4.95    0.82
   2   9  -3    3.36    0.76
  -2   9   3    3.50    0.96
   1  -9  -3   18.56    1.30
   1   9  -3   18.82    1.35
   1   9  -3   18.44    1.34
  -1   9   3   17.28    1.46
   0  -9  -3    1.20    0.74
   0   9  -3    2.45    0.71
   0   9   3    1.53    0.88
   0   9  -3    0.95    0.70
  -1  -9  -3   15.59    1.27
  -1   9  -3   15.19    1.21
  -1   9  -3   15.05    1.11
   1   9   3   12.95    1.21
  -2  -9  -3   10.52    1.18
  -2   9  -3   10.36    1.13
  -2   9  -3    9.18    0.93
  -3  -9  -3    1.16    0.83
  -3   9  -3    1.37    0.72
  -3   9  -3   -0.28    0.63
  -4  -9  -3    2.04    0.83
  -4   9  -3    1.97    0.71
  -4   9  -3    2.75    0.79
  -5  -9  -3    2.00    0.88
  -5   9  -3    3.15    0.83
  -5   9  -3    3.45    0.82
  -6  -9  -3   17.00    1.53
  -6   9  -3   16.84    1.39
  -6   9  -3   14.11    1.24
  -7  -9  -3    2.43    0.99
  -7   9  -3    2.07    0.88
  -7   9  -3    2.37    0.88
  -8  -9  -3   14.48    1.41
  -8   9  -3   15.57    1.47
  -8   9  -3   12.00    1.26
  -9  -9  -3   28.99    2.09
  -9   9  -3   32.47    2.07
  -9   9  -3   30.61    1.92
 -10  -9  -3   -0.78    1.08
 -10   9  -3    1.89    1.02
 -11  -9  -3   34.38    2.30
 -11   9  -3   35.30    2.06
 -12  -9  -3    5.79    1.41
 -12   9  -3    2.30    1.20
 -13  -9  -3    9.84    1.57
 -13   9  -3    9.98    1.53
 -13  10   3    3.40    1.46
 -12  10   3   -1.56    1.26
 -11  10   3    3.54    1.34
 -10  10   3    4.44    1.27
  -9 -10   3    1.72    1.02
  -9  10   3    0.72    1.16
  -8  10   3    1.14    1.16
   7 -10  -3    1.42    0.70
  -7  10   3    4.49    1.18
   6 -10  -3    1.30    0.70
  -6  10   3    1.64    1.05
   5 -10  -3    1.24    0.82
  -5  10   3    1.65    1.02
   4 -10  -3    3.96    0.86
  -4  10   3    4.58    1.07
   3 -10  -3    8.53    0.98
  -3  10   3   10.06    1.24
   2 -10  -3    1.62    0.74
  -2  10   3    1.99    1.02
   2  10  -3    2.39    1.05
   2  10  -3    1.46    0.77
   1 -10  -3    0.32    0.81
  -1  10   3    1.18    0.98
   1  10  -3    0.13    0.85
   1  10  -3   -0.51    0.84
   0 -10  -3    4.06    0.91
   0  10  -3    3.79    0.94
   0  10  -3    3.28    0.81
   0  10   3    2.56    1.02
  -1 -10  -3   -1.30    0.82
  -1  10  -3   -0.23    0.83
   1  10   3    0.45    1.00
  -1  10  -3    0.46    0.78
  -2 -10  -3    1.41    0.90
  -2  10  -3    1.71    0.82
  -2  10  -3    2.96    0.87
  -3 -10  -3   10.48    1.15
  -3  10  -3    7.32    0.99
  -3  10  -3    8.60    0.93
  -4 -10  -3    0.56    0.84
  -4  10  -3    0.84    0.83
  -4  10  -3   -0.09    0.84
  -5 -10  -3    2.95    0.96
  -5  10  -3    0.86    0.90
  -5  10  -3    1.70    0.81
  -6 -10  -3    4.80    1.12
  -6  10  -3    4.61    0.99
  -6  10  -3    2.65    0.95
  -7 -10  -3    5.15    1.14
  -7  10  -3    3.34    1.04
  -7  10  -3    6.23    1.11
  -8 -10  -3   -0.25    1.02
  -8  10  -3   -0.53    0.88
  -8  10  -3   -0.58    1.09
  -9 -10  -3    2.98    1.21
  -9  10  -3    2.12    1.06
 -10 -10  -3    1.51    1.30
 -10  10  -3    1.20    1.12
 -11 -10  -3   -0.16    1.31
 -11  10  -3   -0.92    1.02
 -12 -10  -3   11.16    1.65
 -12  10  -3    8.67    1.51
 -12  11   3    5.41    1.52
 -11  11   3    1.13    1.33
 -10  11   3    8.40    1.50
  -9  11   3    1.36    1.26
  -8  11   3    1.27    1.22
  -7  11   3   20.41    1.88
  -6  11   3    2.80    1.18
   4 -11  -3    1.40    0.79
  -4  11   3   -0.08    1.05
   3 -11  -3   41.71    2.01
  -3  11   3   42.34    2.31
   2 -11  -3    1.03    0.86
  -2  11   3    0.32    1.04
   1 -11  -3   44.23    2.11
  -1  11   3   44.34    2.36
   1  11  -3   45.00    2.37
   1  11  -3   46.43    2.27
   0 -11  -3    2.62    0.85
   0  11  -3    3.43    1.00
   0  11   3    4.54    1.19
   0  11  -3    3.50    0.99
  -1 -11  -3   17.03    1.46
   1  11   3   17.61    1.71
  -1  11  -3   18.43    1.57
  -1  11  -3   16.81    1.67
  -2 -11  -3    3.45    0.93
  -2  11  -3    3.59    1.06
  -2  11  -3    3.37    0.96
  -3 -11  -3    2.68    1.00
  -3  11  -3    1.75    1.00
  -3  11  -3    1.61    0.84
  -4 -11  -3   17.13    1.52
  -4  11  -3   12.90    1.28
  -4  11  -3   14.44    1.53
  -5 -11  -3   -0.53    0.95
  -5  11  -3   -0.48    0.90
  -5  11  -3    0.68    0.93
  -6 -11  -3   19.84    1.80
  -6  11  -3   21.11    1.68
  -6  11  -3   22.13    1.74
  -7 -11  -3    9.33    1.39
  -7  11  -3   10.17    1.26
  -8 -11  -3    6.63    1.34
  -8  11  -3    8.64    1.18
  -9 -11  -3    3.32    1.41
  -9  11  -3    6.38    1.26
 -10 -11  -3   -0.27    1.35
 -10  11  -3   -1.50    1.13
 -11 -11  -3    9.04    1.62
 -11  11  -3   10.53    1.49
 -11  12   3   -0.78    1.37
 -10  12   3   -0.29    1.35
  -9  12   3    7.16    1.49
  -8  12   3    2.61    1.32
  -7  12   3    5.51    1.47
  -6  12   3   -1.24    1.16
  -5  12   3    0.75    1.17
  -4  12   3    4.74    1.25
   3 -12  -3   -0.30    0.69
  -3  12   3    3.51    1.21
   2 -12  -3   14.30    1.48
  -2  12   3   14.04    1.50
   1 -12  -3   21.93    1.55
  -1  12   3   20.45    1.91
   1  12  -3   22.68    1.81
   0 -12  -3   -0.65    0.90
   0  12  -3    1.98    0.92
   0  12  -3    2.77    1.33
   0  12   3    0.06    1.15
  -1 -12  -3   37.17    2.01
  -1  12  -3   37.31    2.17
   1  12   3   40.89    2.32
  -1  12  -3   36.97    2.00
  -2 -12  -3    0.88    0.89
  -2  12  -3   -2.26    1.08
  -2  12  -3    1.46    1.00
  -3 -12  -3    1.89    1.08
  -3  12  -3    4.13    1.23
  -3  12  -3    2.23    0.94
  -4 -12  -3    2.43    1.05
  -4  12  -3    3.45    1.01
  -4  12  -3    4.43    1.41
  -5 -12  -3   17.91    1.78
  -5  12  -3   18.64    1.75
  -6 -12  -3    0.38    1.25
  -6  12  -3   -2.21    0.98
  -7 -12  -3    5.88    1.37
  -7  12  -3   10.12    1.26
  -8 -12  -3    5.18    1.48
  -8  12  -3    6.07    1.31
  -9  12  -3    3.14    1.31
 -10  12  -3    3.97    1.41
  -9  13   3    0.36    1.39
  -8  13   3    7.76    1.60
  -7  13   3   21.35    2.15
  -6  13   3    4.55    1.40
  -5  13   3   14.12    1.65
  -4  13   3    4.49    1.39
  -3  13   3    6.74    1.45
  -2  13   3   -3.21    1.17
   1  13  -3    8.99    1.36
  -1  13   3   10.76    1.53
   0  13   3    1.99    1.27
   0  13  -3    1.74    1.04
  -1  13  -3   17.93    1.81
  -2 -13  -3   19.22    1.86
  -3  13  -3    3.37    1.07
  -4  13  -3   25.00    1.85
  -5  13  -3    3.65    1.10
  -6  13  -3    8.57    1.37
  -7  13  -3    5.05    1.33
  -8  13  -3    4.57    1.40
  -7  14   3    9.67    1.69
  -6  14   3    6.51    1.68
  -5  14   3    3.24    1.48
  -4  14   3    2.02    1.41
  -3  14   3   -3.10    1.25
  -2  14   3    1.64    1.39
  -1  14   3   -2.20    1.28
   0  14   3    4.42    1.44
   0  14  -3    4.49    1.37
  -1  14  -3    0.15    1.10
  -2  14  -3    1.44    1.13
  -3  14  -3    2.34    1.16
  -4  14  -3   -0.85    1.09
  -5  14  -3   -0.77    1.25
  -6  14  -3   -0.65    1.34
  -3  15   3   10.53    1.70
  -2  15   3    4.61    1.50
  -1  15   3    2.29    1.51
   0  15  -3    9.13    1.59
  -1  15  -3    3.59    1.43
  -2  15  -3   11.25    1.68
 -18   0   4   12.55    1.71
  17   0  -4    2.57    1.41
 -17   0   4    4.24    1.48
  16   0  -4    5.12    1.37
 -16   0   4    4.66    1.29
 -15   0   4    3.93    1.22
  15   0  -4    8.01    1.42
  14   0  -4   22.48    1.84
 -14   0   4   24.35    1.92
 -13   0   4   86.03    3.47
  13   0  -4   86.35    3.45
  12   0  -4  120.93    4.40
 -12   0   4  119.82    4.39
  11   0  -4    4.68    0.90
 -11   0   4    3.63    0.92
  10   0  -4   38.69    1.84
 -10   0   4   35.68    1.80
   9   0  -4  159.53    5.43
  -9   0   4  160.16    5.41
  -8   0   4   31.87    1.50
   8   0  -4   30.78    1.53
   7   0  -4  433.67   13.72
  -7   0   4  424.67   13.69
  -6   0   4  101.69    3.47
  -5   0   4   70.92    2.47
   4   0  -4    6.76    0.71
  -3   0   4   95.85    3.14
   3   0  -4   89.98    3.07
   3   0  -4   92.10    3.07
   2   0  -4  315.80    9.86
   2   0  -4  307.82    9.86
   1   0  -4   78.01    2.53
   1   0  -4   76.88    2.53
   0   0  -4   66.72    2.18
  -1   0  -4   97.64    3.14
  -2   0  -4   28.09    1.07
  -3   0  -4   63.50    2.16
  -4   0  -4   20.84    0.99
  -5   0  -4  121.99    4.05
  -6   0  -4  114.83    3.89
  -7   0  -4   31.76    1.42
  -8   0  -4   12.34    1.14
  -9   0  -4   67.09    2.62
 -10   0  -4   29.41    1.77
 -11   0  -4    6.49    1.02
 -12   0  -4   15.92    1.52
 -13   0  -4   16.42    1.68
 -14   0  -4   31.26    2.07
 -15   0  -4    0.21    1.19
 -16   0  -4   47.47    2.76
 -18  -1   4    0.17    1.42
 -18   1   4    2.77    1.47
  18   1  -4    0.46    1.47
  17  -1  -4   -0.48    1.48
 -17  -1   4   -0.33    1.34
 -17   1   4    0.30    1.25
  17   1  -4   -1.05    1.36
  16  -1  -4   -1.29    1.16
 -16  -1   4   -1.06    1.21
  16   1  -4    0.49    1.20
 -16   1   4    0.24    1.15
  15  -1  -4    2.26    1.14
 -15  -1   4    0.35    1.21
 -15   1   4    1.27    1.25
  15   1  -4    0.20    1.15
 -14  -1   4   18.28    1.76
  14  -1  -4   20.37    1.75
  14   1  -4   15.45    1.75
 -14   1   4   18.41    1.83
 -13  -1   4    4.27    1.10
  13  -1  -4    2.98    1.06
 -13   1   4    4.38    1.12
  13   1  -4    5.17    1.13
  12  -1  -4    0.30    0.89
 -12  -1   4    0.05    0.93
  12   1  -4    1.61    0.94
 -12   1   4    1.68    0.95
  11  -1  -4    5.04    0.96
 -11  -1   4    4.99    0.94
 -11   1   4    5.91    0.98
 -10  -1   4   -0.25    0.70
  10  -1  -4   -0.11    0.71
 -10   1   4   -2.02    0.73
   9  -1  -4   26.81    1.48
  -9  -1   4   25.28    1.42
  -9   1   4   26.62    1.32
   8  -1  -4    6.97    0.82
  -8  -1   4    7.66    0.78
  -8   1   4    7.19    0.82
   7  -1  -4    3.10    0.66
  -7  -1   4    1.50    0.58
  -7   1   4    1.81    0.62
  -6  -1   4   32.86    1.38
   6  -1  -4   31.35    1.46
  -6   1   4   33.02    1.43
   5  -1  -4   29.43    1.33
  -5   1   4   29.66    1.30
   4  -1  -4    7.29    0.75
  -4  -1   4    8.36    0.74
  -4   1   4    6.62    0.70
   4   1  -4    7.64    0.69
   3  -1  -4  128.78    4.26
   3   1  -4  131.30    4.21
   2  -1  -4   22.24    0.98
   2  -1  -4   22.87    1.04
   2   1  -4   23.66    0.89
   1  -1  -4   12.61    0.74
   1  -1  -4   12.93    0.69
  -1   1   4   12.69    0.71
   1   1  -4   12.45    0.51
   0  -1  -4  141.41    4.63
   0  -1  -4  146.45    4.63
  -1  -1  -4   15.05    0.77
  -2  -1  -4   25.52    1.09
  -2   1  -4   26.53    0.93
  -3  -1  -4    3.72    0.50
  -3   1  -4    3.97    0.37
  -4  -1  -4   15.58    0.87
  -4   1  -4   14.94    0.79
  -5  -1  -4   -0.96    0.51
  -5   1  -4    0.38    0.43
  -6  -1  -4   37.00    1.57
  -6   1  -4   37.28    1.49
  -7  -1  -4    1.24    0.60
  -7   1  -4    0.91    0.59
  -8  -1  -4    2.90    0.69
  -8   1  -4    2.38    0.72
  -9  -1  -4    5.83    0.92
  -9   1  -4    5.08    0.80
 -10  -1  -4   -0.28    0.77
 -10   1  -4   -0.49    0.74
 -11  -1  -4   -0.67    0.86
 -11   1  -4    0.30    0.85
  11   1   4    0.25    0.92
 -12  -1  -4    1.25    0.99
 -12   1  -4    1.23    0.91
 -13  -1  -4   -0.97    0.96
 -13   1  -4    1.57    1.00
 -14  -1  -4   -0.81    1.11
 -14   1  -4    1.42    1.12
 -15  -1  -4    5.35    1.33
 -15   1  -4    6.64    1.42
 -16  -1  -4    2.29    1.50
 -16   1  -4    3.68    1.47
 -18  -2   4    8.86    1.72
 -18   2   4   10.98    1.69
  18   2  -4    5.91    1.64
  17  -2  -4    8.69    1.47
 -17  -2   4    6.65    1.59
  17   2  -4    9.74    1.54
 -17   2   4    7.91    1.52
  16  -2  -4   15.22    1.57
 -16  -2   4   14.24    1.77
 -16   2   4   11.79    1.61
  16   2  -4   12.37    1.55
  15  -2  -4    0.82    1.08
 -15  -2   4    1.99    1.21
 -15   2   4   -0.44    1.20
  15   2  -4    1.56    1.18
  14  -2  -4    9.43    1.23
 -14  -2   4    7.53    1.26
 -14   2   4    9.61    1.37
 -13  -2   4    0.59    0.98
  13  -2  -4    0.39    0.93
 -13   2   4    0.12    0.99
  12  -2  -4    9.50    1.20
 -12  -2   4    8.15    1.11
 -12   2   4    9.53    1.18
 -11  -2   4   57.64    2.48
  11  -2  -4   59.58    2.52
 -11   2   4   59.36    2.55
 -10  -2   4   14.54    1.25
  10  -2  -4   15.26    1.30
 -10   2   4   14.97    1.34
   9  -2  -4   77.77    2.83
  -9  -2   4   70.97    2.77
  -9   2   4   72.86    2.83
   8  -2  -4    0.79    0.63
  -8  -2   4    1.88    0.62
  -8   2   4    0.78    0.68
   7  -2  -4  200.23    6.62
  -7  -2   4  200.42    6.57
  -7   2   4  201.70    6.61
   6  -2  -4    0.04    0.58
  -6  -2   4   -0.28    0.31
  -6   2   4    0.27    0.56
   5  -2  -4  107.08    3.63
  -5   2   4  105.99    3.62
   4  -2  -4  181.74    5.94
   4   2  -4  182.89    5.89
  -4   2   4  183.20    5.94
   3  -2  -4    7.82    0.75
  -3   2   4    8.58    0.75
   3   2  -4    7.73    0.63
   2  -2  -4   44.44    1.66
  -2   2   4   44.29    1.63
   2   2  -4   44.86    1.53
   1  -2  -4    2.58    0.50
   1   2  -4    2.32    0.21
   0  -2  -4  321.02    9.98
   0  -2  -4  305.93    9.96
  -1  -2  -4   26.01    1.13
  -1  -2  -4   25.99    1.11
  -2  -2  -4   36.31    1.44
  -2   2  -4   35.02    1.13
  -2   2  -4   34.39    1.13
  -3  -2  -4   74.87    2.65
  -3   2  -4   78.29    2.50
  -3   2  -4   76.09    2.50
  -4  -2  -4   42.19    1.66
  -4   2  -4   42.44    1.52
  -5  -2  -4   13.07    0.93
  -5   2  -4   13.23    0.80
  -6  -2  -4   66.43    2.43
  -6   2  -4   63.68    2.34
  -7  -2  -4   79.37    2.89
  -7   2  -4   77.72    2.79
  -8  -2  -4    1.23    0.77
  -8   2  -4   -0.40    0.54
  -9  -2  -4   30.64    1.69
  -9   2  -4   35.01    1.63
 -10  -2  -4    0.89    0.85
 -10   2  -4    1.10    0.87
 -11  -2  -4   36.20    1.97
 -11   2  -4   33.63    1.85
 -12  -2  -4    4.02    1.09
 -12   2  -4    3.26    1.02
 -13  -2  -4   12.89    1.44
 -13   2  -4   16.93    1.62
 -14  -2  -4   22.13    1.96
 -14   2  -4   25.61    1.92
 -15  -2  -4    7.09    1.43
 -15   2  -4    5.98    1.32
 -16  -2  -4    8.24    1.52
 -16   2  -4    3.97    1.37
  18   3  -4    1.87    1.47
 -17  -3   4    0.36    1.42
  17   3  -4   -2.96    1.21
 -17   3   4   -3.95    1.21
 -16  -3   4    0.72    1.32
  16  -3  -4    3.47    1.27
 -16   3   4    1.78    1.34
 -15  -3   4    0.95    1.17
  15  -3  -4   -0.34    1.19
 -15   3   4    0.98    1.24
 -14  -3   4    9.84    1.35
  14  -3  -4   13.44    1.38
 -14   3   4   12.62    1.50
 -13  -3   4    1.13    0.98
  13  -3  -4   -0.40    0.91
 -13   3   4    2.99    1.13
  12  -3  -4   19.50    1.54
 -12  -3   4   21.12    1.59
 -12   3   4   20.27    1.70
  11  -3  -4    3.39    0.89
 -11  -3   4    4.93    0.92
 -11   3   4    3.46    0.97
  10  -3  -4    1.07    0.75
 -10  -3   4    1.70    0.76
 -10   3   4   -0.27    0.77
  -9  -3   4    2.57    0.71
   9  -3  -4    1.18    0.72
  -9   3   4    0.81    0.75
   8  -3  -4   15.89    1.19
  -8  -3   4   17.03    1.10
  -8   3   4   17.34    1.21
  -7  -3   4    0.94    0.48
   7  -3  -4    1.33    0.61
  -7   3   4    1.24    0.66
   6  -3  -4    1.03    0.60
  -6   3   4    0.90    0.62
   5  -3  -4   51.60    2.05
  -5  -3   4   54.35    1.94
   5   3  -4   54.40    2.00
  -5   3   4   53.18    2.06
   4  -3  -4   18.91    1.08
  -4   3   4   18.22    1.06
   4   3  -4   18.94    0.99
   3  -3  -4   22.95    1.15
  -3   3   4   22.71    1.15
   3   3  -4   22.56    0.98
   2  -3  -4    7.75    0.79
   2   3  -4    8.04    0.55
  -2   3   4    7.31    0.66
   1  -3  -4    0.09    0.48
  -1   3   4    1.09    0.49
   1   3  -4    0.72    0.22
   1   3  -4    0.77    0.21
   0  -3  -4   13.19    0.87
   0   3   4   13.21    0.84
  -1  -3  -4    7.24    0.74
  -2  -3  -4    1.39    0.49
  -2   3  -4    1.74    0.18
  -2   3  -4    1.48    0.19
  -3  -3  -4    7.13    0.68
  -3   3  -4    6.41    0.50
  -3   3  -4    6.13    0.46
  -4  -3  -4   10.43    0.89
  -4   3  -4    8.63    0.65
  -4   3  -4    8.59    0.64
  -5  -3  -4    7.14    0.75
  -5   3  -4    7.52    0.70
  -5   3  -4    7.72    0.72
  -6  -3  -4    7.02    0.80
  -6   3  -4    7.20    0.78
  -7  -3  -4    1.81    0.71
  -7   3  -4    0.50    0.60
  -8  -3  -4   19.52    1.36
  -8   3  -4   19.54    1.25
  -9  -3  -4    6.45    0.96
  -9   3  -4    6.02    0.89
 -10  -3  -4   11.04    1.14
 -10   3  -4    8.95    1.06
 -11  -3  -4    3.93    1.05
 -11   3  -4    5.72    1.05
 -12  -3  -4   10.82    1.33
 -12   3  -4   11.06    1.30
 -13  -3  -4    1.38    1.09
 -13   3  -4    3.30    1.16
 -14  -3  -4    5.18    1.33
 -14   3  -4    8.24    1.36
 -15  -3  -4   -0.57    1.22
 -15   3  -4    1.15    1.19
 -16  -3  -4    4.45    1.47
 -16   3  -4    1.76    1.29
 -17  -4   4    0.14    1.55
 -17   4   4    3.34    1.41
 -16  -4   4   27.22    2.53
  16  -4  -4   20.41    2.91
 -16   4   4   31.90    2.30
  15  -4  -4    2.28    1.11
 -15  -4   4    2.13    1.21
 -15   4   4    3.44    1.30
 -14  -4   4   33.24    2.11
  14  -4  -4   34.65    2.05
 -14   4   4   31.05    2.21
  13  -4  -4    0.57    0.95
 -13  -4   4    1.73    0.97
 -13   4   4    2.74    1.17
  12  -4  -4    9.35    1.13
 -12  -4   4    9.00    1.12
 -12   4   4   10.24    1.27
  11  -4  -4    7.85    1.04
 -11  -4   4    7.42    1.02
 -11   4   4    8.91    1.16
 -10  -4   4   43.37    2.11
  10  -4  -4   47.08    2.15
 -10   4   4   45.41    2.16
  -9  -4   4   67.00    2.58
   9  -4  -4   68.69    2.66
  -9   4   4   65.87    2.70
   8  -4  -4   15.74    1.20
  -8  -4   4   17.26    1.07
  -8   4   4   15.48    1.27
   7  -4  -4   32.39    1.56
  -7   4   4   32.30    1.60
   6  -4  -4   14.11    0.90
  -6  -4   4   14.40    1.05
  -6   4   4   13.23    1.10
   5  -4  -4   60.94    2.31
  -5   4   4   61.86    2.33
   5   4  -4   61.61    2.25
   4  -4  -4   17.39    1.09
  -4   4   4   17.96    1.12
   4   4  -4   18.43    1.01
   3  -4  -4  121.93    4.18
   3   4  -4  124.83    4.08
  -3   4   4  126.49    4.20
   2  -4  -4  179.25    5.89
  -2   4   4  178.72    5.88
   2   4  -4  180.79    5.76
   1  -4  -4    6.11    0.68
   1   4  -4    5.90    0.49
  -1   4   4    7.96    0.81
   1   4  -4    6.31    0.51
   0  -4  -4  161.47    5.36
   0   4  -4  160.51    5.17
   0   4   4  165.98    5.36
   0   4  -4  164.23    5.17
  -1  -4  -4    0.22    0.53
  -1   4  -4    0.15    0.21
  -1   4  -4   -0.13    0.21
  -2  -4  -4  253.09    8.22
  -2   4  -4  253.70    8.05
  -2   4  -4  257.68    8.05
  -3  -4  -4    3.37    0.63
  -3   4  -4    3.81    0.39
  -3   4  -4    3.07    0.36
  -4  -4  -4   64.37    2.39
  -4   4  -4   63.33    2.18
  -4   4  -4   61.53    2.16
  -5  -4  -4   14.70    1.10
  -5   4  -4   14.61    0.86
  -5   4  -4   13.64    0.88
  -6  -4  -4   37.99    1.71
  -6   4  -4   38.94    1.49
  -6   4  -4   31.38    1.51
  -7  -4  -4   49.74    2.13
  -7   4  -4   48.97    1.97
  -8  -4  -4    1.95    0.82
  -8   4  -4   -0.39    0.66
  -9  -4  -4   37.97    1.99
  -9   4  -4   40.10    1.89
 -10  -4  -4    2.01    0.94
 -10   4  -4    0.10    0.76
 -11  -4  -4    0.72    1.01
 -11   4  -4    0.74    0.99
 -12  -4  -4    5.42    1.21
 -12   4  -4    5.01    1.05
 -13  -4  -4    4.23    1.23
 -13   4  -4    3.72    1.10
 -14  -4  -4    8.10    1.37
 -14   4  -4    6.83    1.28
 -15  -4  -4   -1.41    1.22
 -15   4  -4   -1.65    1.30
 -16  -4  -4    9.07    1.62
 -16   4  -4   10.01    1.54
 -17   5   4   -2.65    1.33
 -16  -5   4    1.03    1.55
 -16   5   4   -1.46    1.32
 -15  -5   4    3.46    1.29
  15  -5  -4   -0.86    1.10
 -15   5   4    0.56    1.30
 -14  -5   4    7.96    1.29
  14  -5  -4    4.32    1.12
 -14   5   4    4.08    1.32
  13  -5  -4    4.66    1.08
 -13  -5   4    7.35    1.14
 -13   5   4    8.08    1.35
  12  -5  -4    0.72    0.87
 -12  -5   4    1.31    0.98
 -12   5   4    2.58    1.11
 -11  -5   4   17.92    1.38
  11  -5  -4   13.49    1.53
 -11   5   4   14.80    1.59
  10  -5  -4    3.83    0.89
 -10  -5   4    5.01    0.83
 -10   5   4    4.43    1.02
   9  -5  -4   -1.09    0.69
  -9  -5   4   -0.41    0.62
  -9   5   4   -0.88    0.83
   8  -5  -4   49.36    2.09
  -8   5   4   47.43    2.15
   7  -5  -4   35.89    1.70
  -7   5   4   35.70    1.75
  -6  -5   4   -0.86    0.96
   6  -5  -4   -0.24    0.58
  -6   5   4    0.38    0.68
   5  -5  -4    0.42    0.47
   5   5  -4    0.82    0.56
  -5   5   4    0.35    0.67
   4  -5  -4   14.09    1.05
  -4   5   4   15.64    1.13
   4   5  -4   15.53    0.99
   3  -5  -4   54.71    2.10
  -3   5   4   53.47    2.10
   3   5  -4   54.12    1.98
   2  -5  -4   18.91    1.12
   2   5  -4   18.97    0.92
  -2   5   4   18.44    1.00
   1  -5  -4  144.36    4.82
   1   5  -4  146.06    4.66
  -1   5   4  145.38    4.83
   1   5  -4  140.66    4.66
   0  -5  -4   66.05    2.45
   0   5  -4   65.15    2.24
   0   5  -4   65.91    2.24
   0   5   4   69.57    2.47
  -1  -5  -4    3.53    0.66
  -1   5  -4    3.81    0.38
  -1   5  -4    3.78    0.40
   1   5   4    3.40    0.66
  -2  -5  -4    0.78    0.47
  -2   5  -4    0.69    0.35
  -2   5  -4    1.27    0.35
  -3  -5  -4   60.84    2.36
  -3   5  -4   61.89    2.13
  -3   5  -4   62.05    2.12
  -4  -5  -4    6.43    0.80
  -4   5  -4    7.53    0.63
  -4   5  -4    7.95    0.65
  -5  -5  -4    2.39    0.72
  -5   5  -4    1.64    0.50
  -5   5  -4    2.08    0.47
  -6  -5  -4    3.21    0.78
  -6   5  -4    4.16    0.60
  -6   5  -4    3.76    0.61
  -7  -5  -4    0.46    0.79
  -7   5  -4    0.26    0.58
  -7   5  -4    0.53    0.58
  -8  -5  -4    7.99    1.04
  -8   5  -4   10.17    0.99
  -8   5  -4    9.49    0.90
  -9  -5  -4    0.70    0.89
  -9   5  -4   -1.21    0.67
 -10  -5  -4    7.46    1.14
 -10   5  -4    6.58    1.01
 -11  -5  -4    0.84    1.03
 -11   5  -4    0.51    0.96
 -12  -5  -4    2.29    1.17
 -12   5  -4    1.59    0.95
 -13  -5  -4    2.91    1.28
 -13   5  -4    3.98    1.24
 -14  -5  -4   -0.24    1.31
 -14   5  -4    0.88    1.10
 -15  -5  -4    1.02    1.37
 -15   5  -4    1.38    1.20
 -16   6   4   12.26    1.68
 -15  -6   4    3.95    1.30
 -15   6   4   -0.56    1.30
  14  -6  -4   10.44    1.29
 -14  -6   4   11.13    1.38
 -14   6   4   14.57    1.60
  13  -6  -4    1.09    0.98
 -13  -6   4    2.58    1.16
 -13   6   4    2.14    1.18
  12  -6  -4   14.34    1.46
 -12  -6   4   14.50    1.44
 -12   6   4   13.51    1.48
  11  -6  -4    5.88    0.99
 -11  -6   4    5.45    0.94
 -11   6   4    6.54    1.17
  10  -6  -4    1.63    0.83
 -10  -6   4    0.16    0.75
 -10   6   4   -0.04    0.94
   9  -6  -4   13.22    1.27
  -9   6   4   10.72    1.19
   8  -6  -4   10.18    0.99
  -8   6   4    8.01    1.06
  -7  -6   4  101.60    3.54
   7  -6  -4  100.21    3.59
  -7   6   4   96.67    3.64
   6  -6  -4    0.96    0.69
  -6   6   4    1.59    0.78
   5  -6  -4   97.89    3.46
  -5   6   4   95.77    3.50
   5   6  -4   96.43    3.41
   4  -6  -4   49.81    2.01
   4   6  -4   48.47    1.94
  -4   6   4   46.94    2.04
   3  -6  -4   18.06    1.15
   3   6  -4   16.49    0.99
  -3   6   4   15.20    1.17
   2  -6  -4   74.70    2.79
  -2   6   4   79.53    2.83
   2   6  -4   76.14    2.66
   2   6  -4   76.58    2.66
   1  -6  -4   47.53    1.94
   1   6  -4   48.82    1.77
  -1   6   4   46.36    1.96
   1   6  -4   48.50    1.76
   0  -6  -4   95.85    3.39
   0   6   4  100.74    3.46
   0   6  -4   97.18    3.26
   0   6  -4   97.23    3.26
  -1  -6  -4    1.75    0.62
   1   6   4    1.68    0.65
  -1   6  -4    1.30    0.43
  -1   6  -4    1.54    0.42
  -2  -6  -4   69.11    2.61
  -2   6  -4   70.40    2.40
  -2   6  -4   69.26    2.41
  -3  -6  -4   29.89    1.51
  -3   6  -4   31.05    1.26
  -3   6  -4   29.48    1.27
  -4  -6  -4   71.95    2.75
  -4   6  -4   73.48    2.55
  -4   6  -4   71.64    2.53
  -5  -6  -4   26.79    1.52
  -5   6  -4   26.25    1.22
  -5   6  -4   26.32    1.25
  -6  -6  -4   42.77    2.02
  -6   6  -4   43.17    1.77
  -6   6  -4   44.91    1.83
  -7  -6  -4  200.68    6.78
  -7   6  -4  195.38    6.59
  -7   6  -4  203.15    6.60
  -8  -6  -4   29.94    1.83
  -8   6  -4   30.67    1.58
  -8   6  -4   29.45    1.59
  -9  -6  -4   90.31    3.58
  -9   6  -4   93.48    3.42
  -9   6  -4   89.52    3.35
 -10  -6  -4   12.97    1.38
 -10   6  -4   14.12    1.43
 -11  -6  -4   57.15    2.79
 -11   6  -4   59.80    2.55
 -12  -6  -4    0.60    1.13
 -12   6  -4    2.39    1.00
 -13  -6  -4    4.06    1.29
 -13   6  -4    4.34    1.24
 -14  -6  -4    4.39    1.41
 -14   6  -4    9.08    1.42
 -15  -6  -4    3.25    1.36
 -15   6  -4    2.35    1.27
 -16   7   4    4.53    1.50
 -15   7   4    0.99    1.33
 -14  -7   4    1.52    1.71
 -14   7   4    1.00    1.34
  13  -7  -4    1.12    0.95
 -13  -7   4    2.19    1.00
 -13   7   4    1.36    1.26
  12  -7  -4   -1.52    0.94
 -12  -7   4    0.27    0.89
 -12   7   4   -0.66    1.19
 -11  -7   4   -0.26    0.83
  11  -7  -4    0.66    0.89
 -11   7   4   -0.19    1.08
  10  -7  -4    7.51    1.08
 -10  -7   4    4.81    0.86
 -10   7   4    6.71    1.18
   9  -7  -4   -1.04    0.85
  -9   7   4   -0.97    0.98
  -8  -7   4    0.73    0.73
   8  -7  -4    2.43    0.81
  -8   7   4    0.38    0.97
   7  -7  -4    6.62    0.91
  -7   7   4    6.49    1.04
   6  -7  -4    0.72    0.78
  -6   7   4    0.93    0.87
   5  -7  -4    4.03    0.78
  -5   7   4    4.45    0.90
   5   7  -4    4.11    0.83
   4  -7  -4    1.87    0.71
   4   7  -4    1.41    0.63
  -4   7   4    2.20    0.79
   3  -7  -4    8.71    0.87
  -3   7   4    8.88    0.94
   3   7  -4    8.42    0.86
   2  -7  -4    0.80    0.65
   2   7  -4   -0.13    0.52
   2   7  -4    0.29    0.52
  -2   7   4   -0.41    0.69
   1  -7  -4    4.18    0.72
   1   7  -4    3.07    0.54
   1   7  -4    2.29    0.55
  -1   7   4    1.99    0.75
   0  -7  -4   -0.56    0.62
   0   7  -4   -0.08    0.46
   0   7  -4    0.52    0.45
   0   7   4    0.17    0.68
  -1  -7  -4    1.09    0.69
  -1   7  -4    0.07    0.44
   1   7   4   -0.79    0.71
  -1   7  -4    0.74    0.50
  -2  -7  -4    0.87    0.69
  -2   7  -4    0.37    0.50
  -2   7  -4   -0.02    0.48
  -3  -7  -4   10.36    1.14
  -3   7  -4    9.73    0.85
  -3   7  -4   10.58    0.87
  -4  -7  -4    3.80    0.85
  -4   7  -4    5.56    0.65
  -4   7  -4    5.28    0.64
  -5  -7  -4   -0.58    0.74
  -5   7  -4   -0.27    0.57
  -5   7  -4    0.15    0.56
  -6  -7  -4    0.09    0.80
  -6   7  -4    1.54    0.63
  -6   7  -4    1.89    0.66
  -7  -7  -4    1.69    0.94
  -7   7  -4    1.13    0.73
  -7   7  -4    2.22    0.64
  -8  -7  -4   17.80    1.65
  -8   7  -4   17.96    1.37
  -8   7  -4   15.00    1.33
  -9  -7  -4    9.84    1.26
  -9   7  -4    7.65    1.07
  -9   7  -4    8.41    1.04
 -10  -7  -4    0.89    1.10
 -10   7  -4    3.05    0.95
 -11  -7  -4    0.38    1.26
 -11   7  -4    2.05    0.95
 -12  -7  -4    5.59    1.33
 -12   7  -4    4.59    1.10
 -13  -7  -4    0.07    1.26
 -13   7  -4    0.14    1.06
 -14  -7  -4    4.52    1.39
 -14   7  -4    4.25    1.38
 -15   8   4    2.52    1.45
 -14   8   4   22.88    2.24
 -13   8   4    7.52    1.44
 -12  -8   4    8.67    1.23
  12  -8  -4    9.23    1.20
 -12   8   4    9.63    1.46
  11  -8  -4    9.30    1.12
 -11   8   4    8.83    1.39
  10  -8  -4   -1.32    0.78
 -10   8   4   -1.46    1.08
  -9  -8   4    4.42    1.08
   9  -8  -4    5.29    1.03
  -9   8   4    3.36    1.15
   8  -8  -4   19.63    1.47
  -8   8   4   22.70    1.74
   7  -8  -4   65.21    2.67
  -7   8   4   66.41    2.84
   6  -8  -4    4.35    0.91
  -6   8   4    3.40    1.00
   5  -8  -4  112.58    4.00
  -5   8   4  110.19    4.08
   4  -8  -4   33.80    1.71
  -4   8   4   34.02    1.84
   4   8  -4   36.12    1.77
   3  -8  -4    0.14    0.70
  -3   8   4    0.36    0.81
   3   8  -4    0.69    0.69
   2  -8  -4  101.35    3.62
  -2   8   4  100.19    3.68
   2   8  -4  101.74    3.52
   2   8  -4   97.61    3.49
   1  -8  -4   12.71    1.14
   1   8  -4    9.74    0.97
   1   8  -4   12.03    1.01
  -1   8   4   11.35    1.26
   0  -8  -4   54.63    2.27
   0   8  -4   54.43    2.10
   0   8  -4   54.55    2.10
   0   8   4   54.75    2.35
  -1  -8  -4    3.67    0.80
   1   8   4    4.74    0.91
  -1   8  -4    5.10    0.67
  -1   8  -4    5.87    0.68
  -2  -8  -4   34.80    1.72
  -2   8  -4   31.57    1.48
  -2   8  -4   32.27    1.47
  -3  -8  -4    5.73    0.93
  -3   8  -4    4.27    0.68
  -3   8  -4    5.34    0.70
  -4  -8  -4   29.39    1.70
  -4   8  -4   32.22    1.48
  -4   8  -4   29.83    1.45
  -5  -8  -4    2.63    0.89
  -5   8  -4    1.60    0.70
  -5   8  -4    2.27    0.67
  -6  -8  -4   13.80    1.49
  -6   8  -4   14.94    1.19
  -6   8  -4   14.86    1.21
  -7  -8  -4    2.88    1.06
  -7   8  -4    3.31    0.81
  -7   8  -4    1.49    0.76
  -8  -8  -4    5.40    1.19
  -8   8  -4    8.25    1.03
  -8   8  -4    6.40    0.95
  -9  -8  -4   50.63    2.55
  -9   8  -4   49.41    2.34
  -9   8  -4   47.19    2.26
 -10  -8  -4    6.15    1.28
 -10   8  -4    6.03    1.20
 -10   8  -4    4.66    1.08
 -11  -8  -4   34.86    2.27
 -11   8  -4   34.38    2.07
 -12  -8  -4   30.48    2.23
 -12   8  -4   28.54    1.94
 -13  -8  -4    7.68    1.43
 -13   8  -4    4.34    1.19
 -14  -8  -4    7.72    1.56
 -14   8  -4    2.22    1.27
 -14   9   4    1.33    1.49
 -13   9   4   -2.10    1.25
 -12   9   4    1.25    1.30
  11  -9  -4    4.12    1.00
 -11   9   4    5.04    1.32
 -10  -9   4    2.02    1.24
  10  -9  -4    4.24    1.03
 -10   9   4    3.22    1.25
   9  -9  -4    2.64    1.04
  -9   9   4    2.44    1.17
   8  -9  -4    6.49    1.04
  -8   9   4   10.05    1.30
   7  -9  -4    3.13    0.89
  -7   9   4    3.99    1.15
   6  -9  -4    0.66    0.78
  -6   9   4    0.33    0.99
   5  -9  -4   32.64    1.74
  -5   9   4   33.13    1.96
   4  -9  -4    1.59    0.86
  -4   9   4   -0.11    0.96
   4   9  -4    0.41    0.94
   3  -9  -4    2.50    0.80
  -3   9   4    2.85    0.95
   3   9  -4    3.43    0.87
   2  -9  -4    6.56    0.90
   2   9  -4    6.92    0.87
   2   9  -4    6.59    0.88
  -2   9   4    6.40    1.06
   1  -9  -4    0.80    0.82
  -1   9   4    0.52    0.90
   1   9  -4    0.86    0.71
   1   9  -4    0.89    0.71
   0  -9  -4   -0.45    0.70
   0   9  -4    0.75    0.70
   0   9   4    2.02    0.91
   0   9  -4    1.11    0.69
  -1  -9  -4   -0.38    0.77
  -1   9  -4    0.47    0.67
  -1   9  -4    0.25    0.65
   1   9   4   -1.15    0.82
  -2  -9  -4    1.82    0.83
  -2   9  -4   -0.38    0.64
  -2   9  -4    1.10    0.69
  -3  -9  -4    1.90    0.90
  -3   9  -4    1.69    0.70
  -3   9  -4    3.60    0.73
  -4  -9  -4   -0.44    0.84
  -4   9  -4    0.32    0.70
  -4   9  -4    0.76    0.70
  -5  -9  -4   -0.43    0.86
  -5   9  -4   -0.97    0.72
  -5   9  -4    0.62    0.75
  -6  -9  -4   -0.99    0.94
  -6   9  -4    0.68    0.77
  -6   9  -4   -0.22    0.75
  -7  -9  -4    1.16    1.06
  -7   9  -4   -0.34    0.79
  -7   9  -4    0.89    0.82
  -8  -9  -4    1.78    1.13
  -8   9  -4    2.97    0.91
  -8   9  -4    0.54    0.90
  -9  -9  -4   -0.43    1.12
  -9   9  -4   -0.26    0.96
  -9   9  -4   -0.08    0.90
 -10  -9  -4    9.61    1.37
 -10   9  -4    8.48    1.13
 -11  -9  -4   29.94    2.13
 -11   9  -4   27.60    2.01
 -12  -9  -4    6.10    1.41
 -12   9  -4    4.19    1.13
 -13  -9  -4    9.40    1.68
 -13   9  -4    7.14    1.45
 -13  10   4   -0.69    1.32
 -12  10   4    6.46    1.49
 -11  10   4    8.54    1.52
 -10  10   4   41.81    2.48
   9 -10  -4   10.89    1.23
  -9  10   4    9.21    1.42
   8 -10  -4    0.96    0.97
  -8  10   4    0.53    1.13
   7 -10  -4   15.43    1.57
  -7  10   4   13.13    1.45
   6 -10  -4    2.09    0.82
  -6  10   4    1.31    1.06
   5 -10  -4   60.19    2.49
  -5  10   4   54.64    2.66
   4 -10  -4   41.01    2.04
  -4  10   4   44.23    2.27
   3 -10  -4   87.78    3.37
  -3  10   4   87.43    3.53
   3  10  -4   90.75    3.37
   2 -10  -4   44.49    2.23
   2  10  -4   44.73    2.03
  -2  10   4   48.58    2.35
   2  10  -4   45.74    2.08
   1 -10  -4   -1.22    0.75
   1  10  -4   -0.73    0.79
  -1  10   4    0.07    0.98
   1  10  -4   -0.96    0.77
   0 -10  -4   14.32    1.34
   0  10  -4   14.12    1.18
   0  10   4   14.04    1.59
   0  10  -4   15.52    1.34
  -1 -10  -4   -0.54    0.81
  -1  10  -4   -0.65    0.75
   1  10   4   -1.52    0.97
  -1  10  -4    0.41    0.77
  -2 -10  -4    4.72    0.96
  -2  10  -4    5.56    0.86
  -2  10  -4    4.16    0.86
  -3 -10  -4   10.79    1.18
  -3  10  -4   11.91    1.22
  -3  10  -4   10.98    1.01
  -4 -10  -4    1.87    0.97
  -4  10  -4    2.32    0.85
  -4  10  -4    1.39    0.81
  -5 -10  -4    7.68    1.14
  -5  10  -4    5.46    0.94
  -5  10  -4    4.86    0.92
  -6 -10  -4    1.09    1.06
  -6  10  -4    0.67    0.87
  -6  10  -4   -0.04    0.86
  -7 -10  -4   41.61    2.35
  -7  10  -4   41.50    2.11
  -7  10  -4   40.97    2.02
  -8 -10  -4    2.60    1.16
  -8  10  -4    3.02    1.00
  -8  10  -4    2.48    0.97
  -9 -10  -4    6.31    1.34
  -9  10  -4    7.56    1.11
 -10 -10  -4    1.22    1.27
 -10  10  -4    3.25    1.04
 -11 -10  -4   10.62    1.53
 -11  10  -4   10.65    1.41
 -12 -10  -4   11.94    1.63
 -12  10  -4   12.17    1.55
 -12  11   4   -0.46    1.44
 -11  11   4   -0.64    1.33
 -10  11   4    1.05    1.34
  -9  11   4   -0.20    1.27
   8 -11  -4   17.36    1.48
  -8  11   4   20.92    1.94
   7 -11  -4   -0.40    0.86
  -7  11   4    0.42    1.15
   6 -11  -4    2.74    0.90
  -6  11   4    1.79    1.18
   5 -11  -4    1.63    0.97
  -5  11   4    3.21    1.20
   4 -11  -4   15.77    1.45
  -4  11   4   19.15    1.83
   3 -11  -4   20.48    1.53
  -3  11   4   22.03    1.89
   3  11  -4   21.21    1.92
   2 -11  -4    2.06    0.87
   2  11  -4    0.91    1.01
  -2  11   4   -1.91    1.04
   1 -11  -4    9.08    1.10
   1  11  -4    8.68    1.15
   1  11  -4    8.45    1.09
  -1  11   4   10.95    1.33
   0 -11  -4    8.73    1.11
   0  11   4    8.17    1.33
   0  11  -4    8.89    1.09
   0  11  -4    6.50    1.07
  -1 -11  -4    1.86    0.91
   1  11   4    1.12    1.08
  -1  11  -4   -0.94    0.89
  -1  11  -4    0.96    0.90
  -2 -11  -4   -1.29    0.94
  -2  11  -4    0.76    0.88
  -2  11  -4   -1.24    0.90
  -3 -11  -4   13.95    1.46
  -3  11  -4    9.09    1.12
  -3  11  -4    7.44    1.06
  -4 -11  -4    0.93    1.01
  -4  11  -4   -0.72    0.75
  -4  11  -4   -1.24    0.86
  -5 -11  -4   11.70    1.34
  -5  11  -4   13.91    1.47
  -5  11  -4   10.75    1.20
  -6 -11  -4    2.89    1.28
  -6  11  -4    4.74    1.07
  -6  11  -4    2.89    1.01
  -7 -11  -4    9.78    1.42
  -7  11  -4   10.40    1.24
  -8 -11  -4    4.20    1.34
  -8  11  -4    2.08    1.09
  -9 -11  -4   -2.03    1.43
  -9  11  -4    0.71    0.99
 -10 -11  -4    3.73    1.48
 -10  11  -4    2.62    1.12
 -11 -11  -4    0.99    1.50
 -11  11  -4    1.31    1.27
 -11  12   4    8.73    1.68
 -10  12   4   -1.60    1.27
  -9  12   4    5.68    1.49
  -8  12   4    1.44    1.33
  -7  12   4    9.99    1.53
  -6  12   4   -0.13    1.22
   5 -12  -4   22.28    1.66
  -5  12   4   27.15    2.07
   4 -12  -4   17.71    1.50
  -4  12   4   15.95    1.72
   3 -12  -4    2.31    0.91
  -3  12   4    2.44    1.22
   2 -12  -4    9.65    1.15
   2  12  -4   10.37    1.44
  -2  12   4   10.31    1.41
   1 -12  -4    4.36    1.00
   1  12  -4    5.83    1.28
  -1  12   4    4.47    1.29
   1  12  -4    5.38    1.10
   0 -12  -4    8.39    1.24
   0  12  -4    8.52    1.17
   0  12   4    8.24    1.39
   0  12  -4    6.54    1.04
  -1 -12  -4    7.61    1.16
  -1  12  -4    6.76    1.24
  -1  12  -4    6.47    1.01
  -2 -12  -4   32.97    1.98
  -2  12  -4   29.81    2.05
  -2  12  -4   33.20    1.97
  -3 -12  -4    8.21    1.21
  -3  12  -4    6.62    1.05
  -3  12  -4   10.21    1.25
  -4 -12  -4    6.60    1.27
  -4  12  -4    9.37    1.25
  -4  12  -4    8.23    1.19
  -5 -12  -4   13.00    1.49
  -5  12  -4   15.17    1.66
  -6 -12  -4    2.95    1.26
  -6  12  -4    0.98    1.10
  -7 -12  -4    6.67    1.46
  -7  12  -4    7.56    1.28
  -8 -12  -4   -0.79    1.51
  -8  12  -4   -0.55    1.10
  -9 -12  -4    7.15    1.51
  -9  12  -4   12.48    1.41
  -9  13   4   -0.88    1.38
  -8  13   4   -1.01    1.30
  -7  13   4    1.23    1.39
  -6  13   4    5.52    1.44
  -5  13   4    0.69    1.31
  -4  13   4    4.46    1.41
  -3  13   4    7.25    1.43
  -2  13   4    1.91    1.28
   1 -13  -4    9.73    2.12
   1  13  -4    8.65    1.26
  -1  13   4   10.46    1.53
   0 -13  -4    0.02    0.92
   0  13   4   -1.53    1.20
   0  13  -4   -1.10    1.04
  -1 -13  -4    8.71    1.29
  -1  13  -4    7.17    1.23
  -2 -13  -4    3.08    1.10
  -2  13  -4    0.78    1.10
  -3 -13  -4    0.87    1.24
  -3  13  -4   -0.74    0.95
  -4 -13  -4   -0.15    1.08
  -4  13  -4    2.61    1.11
  -5  13  -4    3.93    1.19
  -6  13  -4    0.09    1.04
  -7  13  -4    1.73    1.24
  -8  13  -4    0.48    1.28
  -7  14   4   10.90    1.75
  -6  14   4    2.72    1.51
  -5  14   4    5.87    1.51
  -4  14   4   10.64    1.64
  -3  14   4    3.63    1.46
  -2  14   4   16.47    1.83
  -1  14   4   -0.25    1.32
   0  14  -4   35.31    2.34
  -1  14  -4    6.63    1.32
  -2  14  -4    9.68    1.30
  -3  14  -4    0.96    1.09
  -4  14  -4    9.97    1.38
  -5  14  -4    4.17    1.26
  -2  15   4    2.55    1.58
  -1  15   4    0.27    1.46
   0  15  -4    0.70    1.20
 -18   0   5   -1.76    1.54
  18   0  -5   -2.27    1.44
 -17   0   5    1.30    1.42
  17   0  -5    0.58    1.36
  16   0  -5   -2.35    1.27
 -16   0   5    0.54    1.23
  15   0  -5   -2.28    1.08
 -15   0   5    0.67    1.14
  14   0  -5    0.09    1.10
 -14   0   5    0.92    1.10
 -13   0   5    0.94    1.01
  13   0  -5    0.66    1.00
 -12   0   5    0.51    0.92
  12   0  -5    0.26    0.88
 -11   0   5    0.77    0.80
  11   0  -5    0.43    0.81
 -10   0   5    0.16    0.70
  10   0  -5   -0.83    0.73
   9   0  -5   -0.49    0.70
  -9   0   5   -0.12    0.66
  -8   0   5   -0.77    0.59
   8   0  -5   -0.21    0.62
   7   0  -5    0.34    0.60
  -7   0   5    0.16    0.61
  -6   0   5    0.14    0.51
   6   0  -5    0.51    0.57
   5   0  -5   -0.05    0.50
   4   0  -5    0.14    0.45
   4   0  -5    0.05    0.44
  -4   0   5   -0.56    0.47
   3   0  -5   -0.54    0.36
   3   0  -5   -0.20    0.42
   2   0  -5   -0.46    0.35
   2   0  -5   -0.09    0.34
   1   0  -5    0.13    0.29
   1   0  -5   -0.01    0.30
   0   0  -5   -0.35    0.28
   0   0  -5   -0.29    0.27
  -1   0  -5    0.20    0.28
  -2   0  -5    0.03    0.31
  -3   0  -5   -0.01    0.34
  -4   0  -5    0.44    0.42
  -5   0  -5   -0.09    0.46
  -6   0  -5   -0.14    0.47
  -7   0  -5   -0.47    0.52
  -8   0  -5   -0.10    0.60
  -9   0  -5   -0.37    0.69
 -10   0  -5   -0.01    0.79
 -11   0  -5    0.08    0.86
 -12   0  -5    1.28    1.05
 -13   0  -5    1.49    1.06
 -14   0  -5   -1.54    1.16
 -15   0  -5    2.44    1.24
 -16   0  -5    0.90    1.31
 -18  -1   5   34.29    2.61
  18   1  -5   28.87    2.52
 -18   1   5   25.31    2.45
  17  -1  -5    6.32    1.48
 -17  -1   5    3.14    1.50
 -17   1   5    4.63    1.42
  17   1  -5    6.08    1.47
  16  -1  -5   20.39    2.10
 -16  -1   5   19.96    2.09
  16   1  -5   21.39    2.01
 -16   1   5   19.93    2.12
  15  -1  -5   25.07    2.01
 -15  -1   5   26.32    2.03
  15   1  -5   25.82    2.03
 -15   1   5   21.73    2.06
 -14  -1   5    1.53    1.04
  14  -1  -5   -0.31    1.04
 -14   1   5    1.38    1.13
  14   1  -5    0.15    1.07
 -13  -1   5   64.27    2.81
  13  -1  -5   64.57    2.88
  13   1  -5   64.26    2.86
 -13   1   5   66.24    2.89
 -12  -1   5    0.68    0.87
  12  -1  -5    0.46    0.93
  12   1  -5    1.27    0.94
 -12   1   5    0.74    0.99
  11  -1  -5   66.80    2.80
 -11  -1   5   67.41    2.72
 -11   1   5   69.35    2.80
  10  -1  -5   -0.93    0.76
 -10  -1   5    0.49    0.79
 -10   1   5   -0.28    0.72
  -9  -1   5  129.53    4.56
   9  -1  -5  133.93    4.63
  -9   1   5  135.27    4.60
  -8  -1   5    4.90    0.68
   8  -1  -5    4.38    0.76
  -8   1   5    4.36    0.71
   7  -1  -5  174.57    5.75
  -7  -1   5  170.29    5.68
  -7   1   5  172.53    5.71
   6  -1  -5  129.21    4.37
  -6   1   5  131.52    4.37
   5  -1  -5   17.28    1.05
  -5  -1   5   20.13    1.10
   5   1  -5   17.47    1.01
  -5   1   5   18.82    0.99
   4  -1  -5  205.88    6.76
   4   1  -5  211.98    6.73
   3  -1  -5   73.67    2.56
   3  -1  -5   74.18    2.56
   3   1  -5   75.57    2.51
   2  -1  -5   34.43    1.34
   2  -1  -5   35.30    1.35
   2   1  -5   35.48    1.27
  -2   1   5   35.46    1.34
   1  -1  -5    1.54    0.43
   1  -1  -5    0.93    0.36
   1   1  -5    0.92    0.23
   0  -1  -5   85.14    2.80
   0  -1  -5   83.14    2.80
  -1  -1  -5   51.76    1.80
  -1   1  -5   50.33    1.63
  -2  -1  -5    2.33    0.44
  -2   1  -5    2.32    0.26
  -3  -1  -5   47.22    1.71
  -3   1  -5   46.11    1.62
  -4  -1  -5   12.75    0.89
  -4   1  -5   13.65    0.74
  -5  -1  -5  144.17    4.76
  -5   1  -5  142.58    4.70
  -6  -1  -5   10.95    0.89
  -6   1  -5   10.55    0.87
  -7  -1  -5   78.82    3.13
  -7   1  -5   98.05    3.12
  -8  -1  -5    9.94    0.97
  -8   1  -5    9.24    0.89
  -9  -1  -5   43.27    1.97
  -9   1  -5   43.51    2.02
 -10  -1  -5   33.26    1.81
 -10   1  -5   33.77    1.83
 -11  -1  -5    1.52    0.93
 -11   1  -5    0.57    0.85
 -12  -1  -5   47.38    2.34
 -12   1  -5   46.78    2.42
 -13  -1  -5    5.60    1.16
 -13   1  -5    5.62    1.15
 -14  -1  -5   14.88    1.55
 -14   1  -5   16.21    1.74
 -15  -1  -5    9.81    1.47
 -15   1  -5    7.77    1.49
 -16  -1  -5    8.42    1.51
 -16   1  -5    9.56    1.55
 -18  -2   5    1.28    1.46
  18   2  -5    0.04    1.34
 -18   2   5    3.51    1.50
  17  -2  -5    4.26    1.50
 -17  -2   5    6.09    1.57
  17   2  -5    6.17    1.43
 -17   2   5    0.64    1.34
  16  -2  -5    3.23    1.29
 -16  -2   5    3.49    1.37
 -16   2   5    0.83    1.32
  16   2  -5    3.58    1.20
 -15  -2   5    0.23    1.14
  15  -2  -5    0.05    1.12
  15   2  -5   -0.22    1.18
 -15   2   5    2.24    1.27
  14  -2  -5    1.42    1.07
 -14  -2   5    1.51    1.06
 -14   2   5    2.01    1.19
  13  -2  -5    2.69    1.08
 -13  -2   5    1.75    0.97
 -13   2   5    2.71    1.11
 -12  -2   5    4.91    0.97
  12  -2  -5    8.03    1.12
 -12   2   5    6.64    1.12
  11  -2  -5    0.72    0.85
 -11  -2   5    1.68    0.80
 -11   2   5    0.46    0.89
  10  -2  -5    8.49    0.99
 -10  -2   5    8.93    0.94
 -10   2   5    8.72    1.01
  -9  -2   5    1.93    0.67
   9  -2  -5    1.23    0.75
  -9   2   5    0.68    0.72
   8  -2  -5    0.05    0.68
  -8  -2   5    0.28    0.62
  -8   2   5    0.61    0.67
   7  -2  -5    0.60    0.62
  -7  -2   5   -0.13    0.35
  -7   2   5    0.11    0.59
   6  -2  -5    8.31    0.90
  -6   2   5    7.61    0.76
   5  -2  -5    5.05    0.67
  -5   2   5    5.30    0.65
   5   2  -5    4.99    0.59
   4  -2  -5   85.25    2.96
  -4   2   5   84.60    2.94
   4   2  -5   85.72    2.88
   3  -2  -5    6.93    0.75
  -3   2   5    5.72    0.61
   3   2  -5    6.33    0.58
   2  -2  -5   79.30    2.79
   2   2  -5   83.15    2.66
   1  -2  -5   86.54    2.92
   1  -2  -5   85.34    2.89
   1   2  -5   84.56    2.70
   0  -2  -5    2.19    0.46
   0  -2  -5    2.15    0.47
  -1  -2  -5   33.79    1.37
  -1  -2  -5   32.34    1.32
  -2  -2  -5    7.20    0.70
  -2   2  -5    7.32    0.28
  -3  -2  -5   64.95    2.34
  -3   2  -5   65.39    2.17
  -3   2  -5   66.82    2.17
  -4  -2  -5   16.89    0.97
  -4   2  -5   16.40    0.80
  -5  -2  -5   17.11    1.02
  -5   2  -5   16.27    0.90
  -6  -2  -5    1.22    0.59
  -6   2  -5    0.06    0.47
  -7  -2  -5    0.41    0.64
  -7   2  -5   -0.17    0.54
  -8  -2  -5    3.68    0.78
  -8   2  -5    3.94    0.73
  -9  -2  -5   11.18    1.23
  -9   2  -5   11.11    1.04
 -10  -2  -5    0.74    0.83
 -10   2  -5    1.76    0.81
 -11  -2  -5    3.23    1.00
 -11   2  -5    1.41    0.96
 -12  -2  -5    1.27    1.02
 -12   2  -5    2.56    0.95
 -13  -2  -5    2.79    1.13
 -13   2  -5    1.84    1.02
 -14  -2  -5    0.33    1.22
 -14   2  -5    0.28    1.01
 -15  -2  -5    1.12    1.30
 -15   2  -5    1.32    1.33
 -16  -2  -5    0.07    1.46
 -16   2  -5    0.52    1.46
  18   3  -5   11.25    1.64
 -17  -3   5    0.72    1.43
 -17   3   5    2.89    1.33
  17   3  -5    0.67    1.25
  16  -3  -5   33.24    2.39
 -16  -3   5   35.82    2.43
 -16   3   5   36.67    2.37
  16   3  -5   35.73    2.31
 -15  -3   5   11.83    1.58
  15  -3  -5   13.89    1.57
 -15   3   5   12.95    1.56
 -14  -3   5    8.59    1.23
  14  -3  -5   10.10    1.29
 -14   3   5    7.36    1.38
  13  -3  -5   19.53    1.65
 -13  -3   5   14.70    1.50
 -13   3   5   14.82    1.49
  12  -3  -5    1.14    0.92
 -12  -3   5   -0.29    0.83
 -12   3   5    0.77    0.95
 -11  -3   5    2.11    0.85
  11  -3  -5    2.21    0.91
 -11   3   5    1.59    0.96
  10  -3  -5    4.12    0.92
 -10  -3   5    2.77    0.78
 -10   3   5    3.29    0.91
   9  -3  -5   74.83    2.84
  -9  -3   5   78.86    2.83
  -9   3   5   74.98    2.93
   8  -3  -5   41.31    1.88
  -8   3   5   42.27    1.88
   7  -3  -5   20.33    1.25
  -7   3   5   18.05    1.22
   6  -3  -5   78.88    2.94
  -6   3   5   84.21    2.95
   5  -3  -5    9.86    0.95
  -5   3   5    8.79    0.93
   5   3  -5   10.95    0.88
   4  -3  -5   58.74    2.17
  -4   3   5   57.04    2.15
   4   3  -5   56.34    2.05
   3  -3  -5   10.51    0.89
   3   3  -5   10.68    0.67
  -3   3   5   10.99    0.87
   2  -3  -5  199.58    6.48
   2   3  -5  197.03    6.34
  -2   3   5  202.21    6.47
   1  -3  -5  111.69    3.75
   1   3  -5  107.35    3.52
   1   3  -5  114.15    3.53
  -1   3   5  113.29    3.73
   0   3   5   41.50    1.55
  -1  -3  -5   90.11    3.09
  -2  -3  -5    0.29    0.50
  -3  -3  -5  182.10    5.89
  -3   3  -5  179.73    5.68
  -3   3  -5  175.97    5.68
  -4  -3  -5    3.43    0.61
  -4   3  -5    3.52    0.41
  -4   3  -5    3.35    0.39
  -5  -3  -5   93.00    3.31
  -5   3  -5   92.10    3.15
  -5   3  -5   96.29    3.15
  -6  -3  -5   36.07    1.63
  -6   3  -5   34.02    1.45
  -7  -3  -5   52.10    2.16
  -7   3  -5   49.59    1.98
  -8  -3  -5   43.30    2.00
  -8   3  -5   42.99    1.87
  -9  -3  -5   50.96    2.27
  -9   3  -5   48.26    2.13
 -10  -3  -5   29.71    1.82
 -10   3  -5   30.74    1.65
 -11  -3  -5   19.56    1.65
 -11   3  -5   17.61    1.44
 -12  -3  -5   26.20    1.95
 -12   3  -5   28.72    1.88
 -13  -3  -5   -0.26    1.06
 -13   3  -5   -0.04    1.05
 -14  -3  -5   20.63    1.96
 -14   3  -5   18.88    2.01
 -15  -3  -5    1.46    1.31
 -15   3  -5    0.21    1.33
 -16  -3  -5    2.55    1.38
 -17   4   5    0.82    1.39
 -16  -4   5    1.03    1.35
  16  -4  -5    1.09    1.42
 -16   4   5   -0.74    1.33
 -15  -4   5    5.04    1.36
  15  -4  -5    3.90    1.22
 -15   4   5    1.26    1.28
  14  -4  -5    3.89    1.14
 -14  -4   5    0.87    1.06
 -14   4   5    2.14    1.26
  13  -4  -5    1.85    1.04
 -13  -4   5    1.24    1.05
 -13   4   5    1.12    1.20
 -12  -4   5    2.76    0.93
  12  -4  -5    2.24    0.99
 -12   4   5    3.88    1.08
  11  -4  -5    2.99    0.95
 -11  -4   5    3.58    0.84
 -11   4   5    3.77    1.03
  10  -4  -5    6.78    0.98
 -10  -4   5    4.86    0.89
 -10   4   5    4.20    0.97
  -9  -4   5   -0.12    0.55
   9  -4  -5   -0.94    0.74
  -9   4   5    1.15    0.84
   8  -4  -5    1.78    0.76
  -8   4   5    1.39    0.76
  -7  -4   5    8.60    0.85
   7  -4  -5    8.53    0.89
  -7   4   5    8.40    0.89
   6  -4  -5    0.91    0.51
  -6   4   5    0.76    0.64
   6   4  -5    1.12    0.61
   5  -4  -5    1.22    0.62
  -5   4   5    1.36    0.64
   5   4  -5    2.04    0.59
   4  -4  -5    9.45    0.94
   4   4  -5    9.04    0.79
  -4   4   5   10.14    0.96
   3  -4  -5    1.99    0.59
  -3   4   5    1.59    0.58
   3   4  -5    1.70    0.43
   2  -4  -5   10.24    0.93
  -2   4   5   10.01    0.91
   2   4  -5   10.51    0.62
   1  -4  -5   49.58    1.94
  -1   4   5   49.41    1.92
   1   4  -5   49.95    1.67
   1   4  -5   50.59    1.68
   0  -4  -5    6.14    0.69
   0   4  -5    6.04    0.32
   0   4   5    6.37    0.67
   0   4  -5    6.45    0.32
  -1  -4  -5    2.89    0.62
  -1   4  -5    3.71    0.18
  -1   4  -5    3.60    0.19
  -2  -4  -5    5.07    0.67
  -2   4  -5    4.05    0.32
  -2   4  -5    4.62    0.33
  -3  -4  -5   13.12    1.01
  -3   4  -5   12.71    0.62
  -3   4  -5   12.23    0.61
  -4  -4  -5    3.21    0.66
  -4   4  -5    3.61    0.40
  -4   4  -5    2.94    0.42
  -5  -4  -5    0.81    0.65
  -5   4  -5    1.25    0.43
  -5   4  -5    1.76    0.45
  -6  -4  -5    1.22    0.70
  -6   4  -5   -0.96    0.48
  -6   4  -5    0.09    0.46
  -7  -4  -5   15.72    1.29
  -7   4  -5   15.86    1.04
  -8  -4  -5    4.56    0.94
  -8   4  -5    6.25    0.79
  -9  -4  -5    0.80    0.90
  -9   4  -5    0.02    0.77
 -10  -4  -5    2.25    0.99
 -10   4  -5    0.70    0.86
 -11  -4  -5    9.65    1.21
 -11   4  -5    8.30    1.07
 -12  -4  -5    0.13    1.10
 -12   4  -5    1.49    0.95
 -13  -4  -5    2.69    1.23
 -13   4  -5    2.32    1.04
 -14  -4  -5    0.11    1.21
 -14   4  -5    0.96    1.06
 -15  -4  -5    2.40    1.39
 -15   4  -5    0.68    1.32
 -17   5   5    1.22    1.41
 -16   5   5    1.90    1.33
  15  -5  -5    5.53    1.34
 -15  -5   5   11.46    1.43
 -15   5   5   11.58    1.53
  14  -5  -5    6.10    1.27
 -14  -5   5    7.24    1.22
 -14   5   5    9.10    1.43
 -13  -5   5   26.62    1.96
  13  -5  -5   26.57    1.92
 -13   5   5   28.40    2.10
  12  -5  -5   -1.70    0.88
 -12  -5   5   -0.72    0.83
 -12   5   5    1.82    1.07
 -11  -5   5   16.32    1.49
  11  -5  -5   17.02    1.50
 -11   5   5   18.54    1.69
  10  -5  -5    5.39    0.95
 -10  -5   5    4.35    0.73
 -10   5   5    5.92    1.05
   9  -5  -5   11.27    1.25
  -9   5   5   10.50    1.11
   8  -5  -5   30.74    1.66
  -8  -5   5   33.10    1.53
  -8   5   5   29.36    1.70
   7  -5  -5   29.38    1.56
  -7   5   5   29.62    1.61
   6  -5  -5   30.75    1.49
   6   5  -5   26.16    1.49
  -6   5   5   26.35    1.50
   5  -5  -5   16.75    1.18
   5   5  -5   16.72    1.11
  -5   5   5   18.03    1.22
   4  -5  -5   47.31    1.94
  -4   5   5   48.04    1.96
   4   5  -5   46.84    1.82
   3  -5  -5    5.66    0.74
   3   5  -5    4.77    0.54
  -3   5   5    4.59    0.74
   2  -5  -5  172.44    5.77
  -2   5   5  173.08    5.76
   2   5  -5  175.30    5.60
   1  -5  -5   48.04    1.98
   1   5  -5   49.57    1.72
   1   5  -5   49.17    1.72
  -1   5   5   50.27    1.97
   0  -5  -5   70.24    2.60
   0   5  -5   69.53    2.33
   0   5   5   71.12    2.59
   0   5  -5   71.28    2.34
  -1  -5  -5  137.44    4.64
  -1   5  -5  138.46    4.38
  -1   5  -5  134.80    4.38
  -2  -5  -5   33.91    1.59
  -2   5  -5   35.33    1.25
  -2   5  -5   34.55    1.25
  -3  -5  -5   53.06    2.07
  -3   5  -5   54.31    1.85
  -3   5  -5   52.94    1.85
  -4  -5  -5   18.42    1.23
  -4   5  -5   18.32    0.90
  -4   5  -5   18.08    0.89
  -5  -5  -5   57.12    2.31
  -5   5  -5   57.89    2.07
  -5   5  -5   55.53    2.05
  -6  -5  -5    5.85    0.90
  -6   5  -5    6.13    0.66
  -6   5  -5    6.64    0.68
  -7  -5  -5   43.46    2.12
  -7   5  -5   46.75    1.92
  -7   5  -5   46.74    1.87
  -8  -5  -5    1.23    0.91
  -8   5  -5   -0.46    0.65
  -9  -5  -5    3.66    0.99
  -9   5  -5    2.59    0.85
 -10  -5  -5   -0.65    0.95
 -10   5  -5    0.74    0.85
 -11  -5  -5   10.30    1.31
 -11   5  -5    9.38    1.19
 -12  -5  -5    8.79    1.35
 -12   5  -5    8.32    1.15
 -13  -5  -5    2.50    1.25
 -13   5  -5    0.42    1.14
 -14  -5  -5   14.26    1.64
 -14   5  -5   13.94    1.58
 -15  -5  -5    5.68    1.47
 -15   5  -5    3.79    1.32
 -16   6   5    6.64    1.60
 -15   6   5    1.16    1.33
  14  -6  -5   -0.61    1.08
 -14  -6   5    4.97    1.13
 -14   6   5    0.80    1.34
 -13  -6   5    1.47    0.93
  13  -6  -5   -0.24    1.03
 -13   6   5   -1.02    1.20
  12  -6  -5   20.60    1.66
 -12  -6   5   19.05    1.52
 -12   6   5   20.59    1.88
 -11  -6   5    1.09    0.77
  11  -6  -5    0.20    0.96
 -11   6   5    0.73    1.11
  10  -6  -5    8.95    1.09
 -10   6   5    6.42    1.16
  -9  -6   5    6.01    0.88
   9  -6  -5    6.73    1.02
  -9   6   5    7.89    1.08
   8  -6  -5    2.30    0.81
  -8   6   5    1.96    0.92
   7  -6  -5    1.06    0.76
  -7   6   5   -0.48    0.80
   6  -6  -5    1.99    0.75
  -6   6   5    1.32    0.80
   6   6  -5    0.31    0.80
   5  -6  -5    0.12    0.65
  -5   6   5   -1.06    0.72
   5   6  -5    0.64    0.60
   4  -6  -5   -0.30    0.64
   4   6  -5   -0.26    0.54
  -4   6   5   -0.65    0.69
   3  -6  -5   14.69    1.17
  -3   6   5   17.10    1.21
   3   6  -5   16.82    0.96
   2  -6  -5   -0.06    0.62
   2   6  -5   -0.25    0.42
   2   6  -5    0.17    0.42
  -2   6   5    0.92    0.53
   1  -6  -5   16.59    1.15
   1   6  -5   16.46    0.88
  -1   6   5   17.66    1.18
   1   6  -5   17.28    0.88
   0  -6  -5   -0.96    0.59
   0   6   5    0.94    0.65
   0   6  -5   -0.26    0.35
   0   6  -5    0.00    0.38
  -1  -6  -5   26.54    1.40
  -1   6  -5   24.71    1.07
  -1   6  -5   25.69    1.05
  -2  -6  -5   -0.10    0.63
  -2   6  -5   -0.37    0.38
  -2   6  -5    0.26    0.36
  -3  -6  -5    2.36    0.75
  -3   6  -5    1.98    0.43
  -3   6  -5    2.03    0.42
  -4  -6  -5    5.68    0.87
  -4   6  -5    5.14    0.56
  -4   6  -5    6.28    0.57
  -5  -6  -5    0.27    0.76
  -5   6  -5   -0.02    0.49
  -5   6  -5    0.80    0.48
  -6  -6  -5   -0.90    0.78
  -6   6  -5   -0.61    0.51
  -6   6  -5   -0.46    0.56
  -7  -6  -5    2.62    0.95
  -7   6  -5    2.43    0.66
  -7   6  -5    1.20    0.66
  -8  -6  -5    1.58    0.98
  -8   6  -5    2.00    0.74
  -8   6  -5    1.10    0.71
  -9  -6  -5   11.62    1.31
  -9   6  -5   11.92    1.28
 -10  -6  -5   -0.93    1.07
 -10   6  -5    1.61    0.90
 -11  -6  -5    0.81    1.12
 -11   6  -5    0.44    0.94
 -12  -6  -5    5.65    1.29
 -12   6  -5    2.56    0.99
 -13  -6  -5    0.61    1.22
 -13   6  -5   -0.08    1.11
 -14  -6  -5    0.38    1.34
 -14   6  -5    0.32    1.11
 -16   7   5   28.96    2.46
 -15   7   5   11.89    1.69
  14  -7  -5   18.04    2.10
 -14   7   5   20.86    2.11
  13  -7  -5   11.60    1.33
 -13  -7   5    8.67    1.15
 -13   7   5   12.18    1.57
  12  -7  -5    4.11    1.07
 -12  -7   5    0.82    0.84
 -12   7   5    3.31    1.23
  11  -7  -5   43.21    2.32
 -11   7   5   43.25    2.42
 -10  -7   5    2.19    1.13
  10  -7  -5    3.92    1.00
 -10   7   5    5.41    1.20
   9  -7  -5   16.18    1.44
  -9   7   5   15.49    1.42
   8  -7  -5   -0.22    0.81
  -8   7   5   -0.50    0.95
   7  -7  -5   53.38    2.40
  -7   7   5   55.21    2.43
   6  -7  -5   26.74    1.56
  -6   7   5   23.31    1.62
   6   7  -5   25.59    1.53
   5  -7  -5   33.64    1.75
  -5   7   5   35.66    1.83
   5   7  -5   35.61    1.64
   4  -7  -5  121.38    4.24
   4   7  -5  119.20    4.10
  -4   7   5  120.18    4.21
   3  -7  -5    9.11    0.92
   3   7  -5    7.97    0.74
  -3   7   5    7.37    0.95
   2  -7  -5  110.63    3.92
  -2   7   5  113.84    3.95
   2   7  -5  110.39    3.75
   2   7  -5  107.82    3.74
   1  -7  -5    2.02    0.73
   1   7  -5    2.37    0.52
  -1   7   5    2.69    0.77
   1   7  -5    3.43    0.53
   0  -7  -5  100.42    3.63
   0   7   5  104.45    3.66
   0   7  -5   98.90    3.40
   0   7  -5  100.75    3.40
  -1  -7  -5   39.66    1.83
  -1   7  -5   37.97    1.52
  -1   7  -5   37.51    1.50
   1   7   5   38.93    1.80
  -2  -7  -5   59.01    2.48
  -2   7  -5   62.19    2.24
  -2   7  -5   64.56    2.22
  -3  -7  -5    3.67    0.83
  -3   7  -5    3.67    0.53
  -3   7  -5    4.26    0.58
  -4  -7  -5    2.86    0.86
  -4   7  -5    3.50    0.58
  -4   7  -5    3.82    0.59
  -5  -7  -5   11.77    1.33
  -5   7  -5   12.15    0.92
  -5   7  -5   11.62    0.99
  -6  -7  -5    9.87    1.11
  -6   7  -5    8.61    0.97
  -6   7  -5    8.99    0.81
  -7  -7  -5   -1.76    0.92
  -7   7  -5    2.13    0.68
  -7   7  -5    1.55    0.69
  -8  -7  -5    1.27    1.03
  -8   7  -5    0.46    0.71
  -8   7  -5    2.15    0.78
  -9  -7  -5   20.74    1.81
  -9   7  -5   19.24    1.46
  -9   7  -5   17.15    1.49
 -10  -7  -5   33.23    2.13
 -10   7  -5   30.59    1.83
 -11  -7  -5    8.39    1.32
 -11   7  -5    6.10    1.04
 -12  -7  -5   18.62    1.96
 -12   7  -5   21.23    1.68
 -13  -7  -5    0.74    1.31
 -13   7  -5    0.34    1.14
 -14  -7  -5    2.09    1.33
 -14   7  -5    1.06    1.33
 -15   8   5    0.32    1.48
 -14   8   5    6.92    1.54
  13  -8  -5    1.59    1.99
 -13   8   5    0.06    1.29
  12  -8  -5    0.93    1.01
 -12   8   5    0.41    1.23
  11  -8  -5    2.09    1.11
 -11  -8   5    0.98    1.17
 -11   8   5   -0.47    1.17
  10  -8  -5    3.19    1.01
 -10   8   5    4.63    1.26
   9  -8  -5    0.48    0.87
  -9   8   5    2.04    1.07
   8  -8  -5    1.75    0.88
  -8   8   5    1.75    1.09
   7  -8  -5    0.49    0.81
  -7   8   5    0.07    0.92
   6  -8  -5    5.06    0.93
  -6   8   5    4.68    1.00
   5  -8  -5   10.52    1.03
   5   8  -5    8.85    1.01
  -5   8   5    9.10    1.11
   4  -8  -5    2.31    0.79
  -4   8   5    0.99    0.90
   4   8  -5    0.05    0.69
   3  -8  -5    0.83    0.75
  -3   8   5    0.57    0.66
   3   8  -5    0.94    0.65
   2  -8  -5    2.16    0.75
   2   8  -5    1.77    0.61
  -2   8   5    0.53    0.83
   2   8  -5    0.01    0.59
   1  -8  -5    7.53    0.94
   1   8  -5    5.77    0.69
   1   8  -5    6.80    0.69
  -1   8   5    5.82    0.95
   0  -8  -5    2.12    0.82
   0   8   5    2.72    0.88
   0   8  -5    1.88    0.58
   0   8  -5    2.15    0.57
  -1  -8  -5    0.43    0.77
  -1   8  -5    0.26    0.53
   1   8   5    0.26    0.82
  -1   8  -5    0.96    0.52
  -2  -8  -5   13.59    1.32
  -2   8  -5   13.62    0.96
  -2   8  -5   14.65    1.04
  -3  -8  -5    1.66    0.87
  -3   8  -5    1.08    0.57
  -3   8  -5    1.45    0.59
  -4  -8  -5   12.15    1.18
  -4   8  -5   11.64    1.05
  -4   8  -5   12.17    1.02
  -5  -8  -5    5.96    1.04
  -5   8  -5    4.92    0.75
  -5   8  -5    5.48    0.74
  -6  -8  -5    0.54    0.98
  -6   8  -5    0.36    0.69
  -6   8  -5    0.20    0.64
  -7  -8  -5    1.35    1.05
  -7   8  -5    0.65    0.71
  -7   8  -5   -0.54    0.69
  -8  -8  -5   -0.14    1.11
  -8   8  -5    0.02    0.74
  -8   8  -5    0.61    0.82
  -9  -8  -5    2.62    1.19
  -9   8  -5    2.69    0.89
  -9   8  -5    4.23    0.98
 -10  -8  -5   -0.17    1.13
 -10   8  -5   -0.48    0.89
 -10   8  -5   -0.32    1.02
 -11  -8  -5   19.34    1.95
 -11   8  -5   15.57    1.70
 -12  -8  -5    9.53    1.49
 -12   8  -5   11.98    1.37
 -13  -8  -5    1.65    1.30
 -13   8  -5    1.57    1.18
 -14   9   5    2.98    1.50
 -13   9   5   12.39    1.64
 -12   9   5    0.64    1.31
  11  -9  -5   45.62    2.35
 -11   9   5   45.27    2.63
  10  -9  -5    3.28    1.04
 -10   9   5    2.12    1.24
   9  -9  -5   34.96    2.02
  -9   9   5   37.47    2.27
   8  -9  -5    1.37    0.92
  -8   9   5    0.19    1.13
   7  -9  -5   12.19    1.20
  -7   9   5   11.96    1.37
   6  -9  -5   26.83    1.67
  -6   9   5   27.57    1.91
   5  -9  -5   18.33    1.45
   5   9  -5   18.38    1.62
  -5   9   5   17.18    1.64
   4  -9  -5   30.73    1.75
   4   9  -5   31.13    1.66
  -4   9   5   32.87    1.90
   3  -9  -5    0.97    0.81
  -3   9   5    1.78    0.94
   3   9  -5    2.64    0.78
   2  -9  -5   83.17    3.30
  -2   9   5   86.18    3.32
   2   9  -5   82.94    3.09
   2   9  -5   85.18    3.10
   1  -9  -5   16.49    1.37
   1   9  -5   16.73    1.20
  -1   9   5   17.97    1.50
   1   9  -5   16.49    1.20
   0  -9  -5   13.51    1.36
   0   9  -5   14.49    1.12
   0   9  -5   13.03    1.11
   0   9   5   17.14    1.48
  -1  -9  -5   47.68    2.25
   1   9   5   51.07    2.32
  -1   9  -5   48.57    1.99
  -1   9  -5   47.72    1.99
  -2  -9  -5   -0.17    0.87
  -2   9  -5   -1.01    0.58
  -2   9  -5   -0.97    0.62
  -3  -9  -5   25.22    1.72
  -3   9  -5   27.39    1.42
  -3   9  -5   24.93    1.37
  -4  -9  -5    1.52    0.96
  -4   9  -5    1.10    0.65
  -4   9  -5    0.52    0.67
  -5  -9  -5   27.87    1.87
  -5   9  -5   29.86    1.58
  -5   9  -5   27.22    1.52
  -6  -9  -5    3.94    1.13
  -6   9  -5    5.48    0.86
  -6   9  -5    4.01    0.82
  -7  -9  -5   23.94    1.96
  -7   9  -5   25.35    1.57
  -7   9  -5   25.89    1.61
  -8  -9  -5   12.08    1.50
  -8   9  -5   13.24    1.34
  -8   9  -5   14.30    1.45
  -9  -9  -5    7.62    1.35
  -9   9  -5    6.99    1.04
  -9   9  -5    6.77    1.12
 -10  -9  -5    6.84    1.31
 -10   9  -5    6.26    1.09
 -11  -9  -5   16.41    1.68
 -11   9  -5   15.92    1.75
 -12  -9  -5   29.56    2.26
 -12   9  -5   25.98    2.09
 -13  10   5    0.74    1.57
 -12  10   5    2.21    1.41
 -11  10   5   -1.35    1.31
  10 -10  -5    0.71    0.94
 -10  10   5    1.87    1.33
   9 -10  -5    9.40    1.24
  -9  10   5    7.64    1.40
   8 -10  -5    0.71    0.91
  -8  10   5    0.57    1.15
   7 -10  -5    2.13    0.93
  -7  10   5    0.98    1.16
   6 -10  -5    5.73    1.02
  -6  10   5    2.74    1.20
   5 -10  -5   27.97    1.86
  -5  10   5   26.12    1.95
   5  10  -5   28.52    2.02
   4 -10  -5    3.65    0.93
   4  10  -5    1.84    0.93
  -4  10   5    3.99    1.15
   3 -10  -5    7.56    1.06
  -3  10   5    6.68    1.24
   3  10  -5    7.09    1.01
   2 -10  -5    0.44    0.94
   2  10  -5    1.17    0.73
  -2  10   5    0.43    1.03
   1 -10  -5    4.74    0.94
   1  10  -5    4.32    0.85
   1  10  -5    4.39    0.85
  -1  10   5    4.71    1.13
   0 -10  -5    1.78    0.92
   0  10  -5    0.57    0.74
   0  10   5    2.69    1.09
   0  10  -5    1.03    0.73
  -1 -10  -5    2.99    1.00
  -1  10  -5    0.19    0.72
  -1  10  -5    1.85    0.77
  -2 -10  -5    3.98    1.04
  -2  10  -5    5.75    0.85
  -2  10  -5    4.48    0.85
  -3 -10  -5    5.22    1.10
  -3  10  -5    4.43    0.83
  -3  10  -5    4.54    0.82
  -4 -10  -5    4.22    1.09
  -4  10  -5    3.27    0.84
  -4  10  -5    3.28    0.82
  -5 -10  -5   -0.41    1.01
  -5  10  -5   -0.40    0.81
  -5  10  -5   -1.35    0.77
  -6 -10  -5    7.95    1.29
  -6  10  -5    8.47    1.01
  -6  10  -5    8.75    1.05
  -7 -10  -5    0.13    1.11
  -7  10  -5    0.50    0.89
  -7  10  -5   -0.27    0.90
  -8 -10  -5    6.11    1.29
  -8  10  -5    5.98    1.09
  -8  10  -5    8.40    1.12
  -9 -10  -5    2.15    1.22
  -9  10  -5    0.21    0.98
 -10 -10  -5    4.70    1.38
 -10  10  -5    5.60    1.21
 -11 -10  -5    0.18    1.39
 -11  10  -5    2.79    1.20
 -12  11   5    2.02    1.50
 -11  11   5   11.06    1.71
 -10  11   5    1.09    1.36
  -9  11   5    5.88    1.44
   8 -11  -5    6.88    1.10
  -8  11   5    9.55    1.49
   7 -11  -5    1.10    0.94
  -7  11   5   -1.53    1.17
   6 -11  -5    2.84    1.06
  -6  11   5    2.41    1.21
   5 -11  -5   -0.69    0.88
  -5  11   5    1.45    1.18
   4 -11  -5   27.22    1.82
  -4  11   5   31.24    2.14
   4  11  -5   30.03    2.09
   3 -11  -5   -1.27    0.87
   3  11  -5    1.41    1.04
  -3  11   5    0.40    1.17
   2 -11  -5   96.55    3.63
  -2  11   5   92.27    3.78
   2  11  -5   90.73    3.57
   1 -11  -5   25.07    1.73
  -1  11   5   24.75    1.95
   1  11  -5   25.50    1.63
   1  11  -5   25.12    1.67
   0 -11  -5    4.04    0.98
   0  11   5    2.71    1.21
   0  11  -5    3.74    0.90
   0  11  -5    3.12    0.93
  -1 -11  -5    4.34    1.01
  -1  11  -5    3.73    0.90
  -1  11  -5    2.65    0.91
  -2 -11  -5    3.17    1.02
  -2  11  -5    1.34    0.87
  -2  11  -5    2.92    0.88
  -3 -11  -5   19.08    1.74
  -3  11  -5   20.44    1.52
  -3  11  -5   22.71    1.60
  -4 -11  -5    0.32    1.04
  -4  11  -5   -0.61    0.89
  -4  11  -5   -0.39    0.78
  -5 -11  -5   17.00    1.78
  -5  11  -5   14.32    1.55
  -5  11  -5   17.31    1.51
  -6 -11  -5    6.27    1.40
  -6  11  -5    3.50    1.01
  -6  11  -5    1.35    0.95
  -7 -11  -5   12.32    1.56
  -7  11  -5   15.43    1.57
  -8 -11  -5    4.07    1.39
  -8  11  -5    5.12    1.11
  -9 -11  -5   -0.24    1.26
  -9  11  -5   -0.19    1.12
 -10 -11  -5   15.63    1.80
 -10  11  -5   18.53    1.95
 -11  12   5   -0.01    1.47
 -10  12   5    3.49    1.47
  -9  12   5    3.03    1.44
  -8  12   5    1.83    1.40
  -7  12   5    0.46    1.26
   6 -12  -5   -1.21    0.88
  -6  12   5   -0.90    1.28
   5 -12  -5    0.75    1.01
  -5  12   5    1.18    1.26
   4 -12  -5   15.99    1.59
  -4  12   5   17.35    1.93
   3 -12  -5   21.06    1.69
   3  12  -5   18.47    1.95
  -3  12   5   18.95    1.97
   2 -12  -5    9.49    1.21
  -2  12   5    8.53    1.43
   2  12  -5    9.75    1.33
   1 -12  -5    0.73    1.00
   1  12  -5    1.10    0.85
  -1  12   5    1.98    1.22
   1  12  -5    0.08    0.94
   0 -12  -5   17.93    1.70
   0  12  -5   17.67    1.74
   0  12  -5   17.52    1.44
   0  12   5   14.46    1.58
  -1 -12  -5    5.14    1.18
  -1  12  -5    4.82    1.01
  -1  12  -5    4.85    1.09
  -2 -12  -5   -0.50    1.05
  -2  12  -5   -1.83    0.96
  -2  12  -5    0.93    0.93
  -3 -12  -5    1.42    1.13
  -3  12  -5    2.05    0.94
  -3  12  -5    2.18    1.04
  -4 -12  -5    2.44    1.18
  -4  12  -5    3.75    1.11
  -4  12  -5    2.08    1.01
  -5 -12  -5    1.68    1.20
  -5  12  -5    0.97    0.98
  -6 -12  -5    2.19    1.32
  -6  12  -5    0.72    0.99
  -7 -12  -5    1.62    1.38
  -7  12  -5   -0.74    1.07
  -8 -12  -5   -0.97    1.53
  -8  12  -5    0.51    1.12
  -9 -12  -5    1.63    1.53
  -9  12  -5   -0.84    1.24
  -9  13   5    2.27    1.64
  -8  13   5    0.15    1.41
  -7  13   5   33.17    2.53
  -6  13   5   12.22    1.78
  -5  13   5    7.45    1.53
  -4  13   5   37.90    2.51
  -3  13   5    1.55    1.47
   2 -13  -5    9.15    1.24
  -2  13   5   14.11    1.64
   1 -13  -5    1.11    1.19
   1  13  -5   -0.79    0.90
  -1  13   5    1.66    1.32
   0 -13  -5   58.96    2.90
   0  13   5   62.77    3.08
   0  13  -5   64.66    2.87
  -1 -13  -5   22.30    2.16
  -1  13  -5   20.65    1.77
  -2 -13  -5    8.71    1.39
  -2  13  -5   15.32    1.67
  -3 -13  -5   10.83    1.57
  -3  13  -5    8.52    1.22
  -4 -13  -5   -0.23    1.30
  -4  13  -5    1.22    1.08
  -5 -13  -5   27.43    2.50
  -5  13  -5   27.07    2.02
  -6  13  -5   -1.50    1.10
  -7  13  -5    6.06    1.31
  -6  14   5    7.38    1.68
  -5  14   5    9.81    1.82
  -4  14   5    3.00    1.52
  -3  14   5    1.13    1.45
  -2  14   5   -1.01    1.52
  -1  14   5    5.73    1.55
   0  14  -5    2.93    1.17
  -1  14  -5   -0.63    1.17
  -2  14  -5   10.05    1.41
  -3  14  -5    1.49    1.16
  -4  14  -5    2.19    1.23
  18   0  -6    5.26    1.53
 -18   0   6    4.06    1.70
  17   0  -6    4.07    1.39
 -17   0   6    5.67    1.51
 -16   0   6   14.16    1.67
  16   0  -6   12.41    1.55
 -15   0   6    4.06    1.25
  15   0  -6    6.41    1.34
  14   0  -6    6.92    1.28
 -14   0   6    5.54    1.20
 -13   0   6   31.25    1.96
  13   0  -6   33.72    2.05
 -12   0   6   27.01    1.74
  12   0  -6   29.10    1.85
  11   0  -6   10.71    1.12
 -11   0   6   10.86    1.08
 -10   0   6   49.97    2.11
  10   0  -6   46.23    2.18
   9   0  -6   55.44    2.30
  -9   0   6   55.17    2.23
  -8   0   6   48.11    2.00
   8   0  -6   48.16    2.03
   7   0  -6    2.04    0.65
  -7   0   6    1.75    0.53
   6   0  -6  271.48    8.78
  -5   0   6    5.47    0.64
   5   0  -6    5.86    0.63
   4   0  -6  453.26   14.65
   4   0  -6  471.11   14.64
   3   0  -6  224.85    7.16
   3   0  -6  221.73    7.16
   2   0  -6   23.20    0.99
   2   0  -6   23.53    1.02
   1   0  -6   44.89    1.58
   1   0  -6   44.07    1.57
   0   0  -6    0.21    0.32
   0   0  -6    0.21    0.31
  -1   0  -6    4.54    0.50
  -2   0  -6    2.39    0.38
  -3   0  -6   76.35    2.58
  -4   0  -6  306.47    9.78
  -5   0  -6   16.30    0.90
  -6   0  -6  195.83    6.41
  -7   0  -6   20.42    1.24
  -8   0  -6  119.12    4.14
  -9   0  -6    0.08    0.76
 -10   0  -6   56.13    2.41
 -11   0  -6   21.61    1.72
 -12   0  -6   24.28    1.88
 -13   0  -6    1.52    1.04
 -14   0  -6    2.96    1.28
 -15   0  -6    0.65    1.21
  18  -1  -6    0.51    1.64
  18   1  -6    2.22    1.41
 -18   1   6    2.90    1.56
 -17  -1   6    0.27    1.62
  17  -1  -6   -1.25    1.31
 -17   1   6    2.38    1.49
  17   1  -6    2.38    1.25
  16  -1  -6    4.85    1.36
 -16  -1   6    8.54    1.50
 -16   1   6    6.25    1.50
  16   1  -6    7.59    1.34
 -15  -1   6    2.75    1.22
  15  -1  -6    3.79    1.23
 -15   1   6    3.31    1.22
  15   1  -6    0.48    1.10
  14  -1  -6   27.11    2.18
 -14  -1   6   37.93    2.13
 -14   1   6   38.55    2.20
  14   1  -6   36.33    2.21
  13  -1  -6    1.92    1.05
 -13  -1   6    1.93    0.96
  13   1  -6    2.91    1.11
 -13   1   6    2.71    1.02
 -12  -1   6    8.75    1.07
  12  -1  -6    6.59    1.14
  12   1  -6    8.45    1.16
 -12   1   6    8.02    1.11
  11  -1  -6   -0.61    0.84
 -11  -1   6   -0.58    0.77
  11   1  -6   -0.76    0.84
 -11   1   6    0.14    0.91
 -10  -1   6    6.08    0.92
  10  -1  -6    6.07    0.94
 -10   1   6    6.66    0.92
   9  -1  -6    4.50    0.83
  -9  -1   6    4.29    0.74
  -9   1   6    4.86    0.81
  -8  -1   6   20.47    1.19
   8  -1  -6   20.60    1.31
  -8   1   6   21.01    1.23
   7  -1  -6   15.02    1.14
  -7   1   6   15.80    1.03
   6  -1  -6    1.13    0.64
  -6  -1   6    1.97    0.56
  -6   1   6    1.34    0.54
   5  -1  -6    2.80    0.62
   5   1  -6    1.73    0.58
   4  -1  -6   41.11    1.60
   4   1  -6   39.48    1.52
   3  -1  -6    5.70    0.57
   3  -1  -6    6.27    0.62
   3   1  -6    6.19    0.60
   2  -1  -6   85.50    2.86
   2  -1  -6   84.19    2.84
   2   1  -6   82.96    2.77
   1  -1  -6   16.52    0.82
   1  -1  -6   15.47    0.81
   1   1  -6   17.42    0.69
   0  -1  -6   13.42    0.77
   0  -1  -6   12.63    0.75
   0   1  -6   12.93    0.54
  -1  -1  -6   23.22    1.03
  -1  -1  -6   23.12    1.02
  -1   1  -6   23.76    0.84
  -2  -1  -6   29.42    1.19
  -2   1  -6   29.96    1.08
  -3  -1  -6    0.26    0.44
  -3   1  -6    0.26    0.32
  -4  -1  -6   19.15    1.03
  -4   1  -6   18.34    0.87
  -5  -1  -6    4.37    0.62
  -5   1  -6    4.85    0.53
  -6  -1  -6   -0.53    0.52
  -6   1  -6    0.41    0.48
  -7  -1  -6    1.03    0.67
  -7   1  -6    1.36    0.58
  -8  -1  -6    1.44    0.71
  -8   1  -6    0.79    0.66
  -9  -1  -6   18.76    1.47
  -9   1  -6   17.20    1.27
 -10  -1  -6    0.65    0.82
 -10   1  -6    0.41    0.79
 -11  -1  -6   -0.62    0.87
 -11   1  -6    0.38    0.82
 -12  -1  -6    4.41    1.06
 -12   1  -6    3.58    1.08
 -13  -1  -6    0.50    1.14
 -13   1  -6    0.22    1.00
 -14  -1  -6    5.81    1.28
 -14   1  -6    6.51    1.34
 -15  -1  -6    1.81    1.40
 -15   1  -6   -0.60    1.15
 -18   2   6   11.24    1.84
  18   2  -6    7.60    1.53
 -17  -2   6   19.53    2.02
  17  -2  -6   17.07    1.84
  17   2  -6   20.63    2.02
 -17   2   6   21.69    2.19
 -16  -2   6    0.63    1.29
  16  -2  -6    0.41    1.30
 -16   2   6    0.24    1.28
  16   2  -6    0.57    1.17
 -15  -2   6   39.06    2.31
  15  -2  -6   42.66    2.41
 -15   2   6   38.25    2.39
  15   2  -6   38.05    2.39
  14  -2  -6    2.89    1.17
 -14  -2   6    2.54    1.03
 -14   2   6    1.83    1.13
  14   2  -6    2.61    1.14
 -13  -2   6   24.69    1.66
  13  -2  -6   21.88    1.83
 -13   2   6   21.53    1.78
  12  -2  -6   40.49    2.18
 -12  -2   6   40.40    2.00
 -12   2   6   40.82    2.14
 -11  -2   6   44.87    2.04
  11  -2  -6   44.71    2.20
 -11   2   6   46.36    2.17
 -10  -2   6   45.79    2.01
  10  -2  -6   47.21    2.18
 -10   2   6   47.54    2.13
   9  -2  -6   33.40    1.73
  -9  -2   6   32.71    1.52
  -9   2   6   34.31    1.69
   8  -2  -6   92.18    3.42
  -8   2   6   96.56    3.40
  -7  -2   6   73.29    2.65
   7  -2  -6   77.38    2.79
  -7   2   6   73.25    2.74
   6  -2  -6  112.09    3.88
  -6   2   6  112.02    3.85
   6   2  -6  112.72    3.83
   5  -2  -6    4.45    0.66
  -5   2   6    4.16    0.66
   5   2  -6    3.84    0.55
   4  -2  -6   48.71    1.89
   4   2  -6   48.53    1.79
   3  -2  -6   16.06    1.02
   3   2  -6   13.73    0.77
   2  -2  -6    0.35    0.52
   2  -2  -6    0.46    0.47
   2   2  -6    0.58    0.29
   1  -2  -6  124.06    4.12
   1  -2  -6  123.70    4.14
   1   2  -6  120.79    3.93
  -1   2   6  129.93    4.17
   0  -2  -6   38.72    1.53
   0  -2  -6   36.65    1.47
  -1  -2  -6   68.95    2.41
  -1  -2  -6   68.91    2.44
  -2  -2  -6   22.13    1.07
  -2  -2  -6   20.55    1.12
  -2   2  -6   22.39    0.76
  -2   2  -6   23.42    0.76
  -3  -2  -6  142.62    4.73
  -3   2  -6  142.08    4.55
  -4  -2  -6    4.81    0.61
  -4   2  -6    5.04    0.56
  -5  -2  -6   75.45    2.71
  -5   2  -6   75.02    2.59
  -6  -2  -6   56.06    2.34
  -6   2  -6   67.53    2.26
  -7  -2  -6    5.55    0.80
  -7   2  -6    6.54    0.71
  -8  -2  -6   22.67    1.53
  -8   2  -6   21.95    1.24
  -9  -2  -6    8.01    1.01
  -9   2  -6    7.99    0.88
 -10  -2  -6   25.40    1.63
 -10   2  -6   23.01    1.60
 -11  -2  -6    2.44    0.96
 -11   2  -6    3.45    0.90
 -12  -2  -6    7.24    1.21
 -12   2  -6    7.64    1.17
 -13  -2  -6   30.11    2.04
 -13   2  -6   26.49    1.89
 -14  -2  -6    0.77    1.11
 -14   2  -6    1.51    1.19
 -15  -2  -6    7.06    1.42
 -15   2  -6    8.91    1.51
  17  -3  -6   18.45    2.00
  17   3  -6   14.32    1.76
 -17   3   6   20.81    2.21
  16  -3  -6    0.07    1.31
 -16  -3   6    1.00    1.30
  16   3  -6    0.74    1.23
 -16   3   6   -1.72    1.15
 -15  -3   6    2.62    1.25
  15  -3  -6    4.16    1.25
 -15   3   6    1.30    1.25
  14  -3  -6   -0.38    1.08
 -14  -3   6    1.28    1.01
  13  -3  -6   -0.93    1.00
 -13  -3   6   -0.46    0.88
 -13   3   6   -1.07    1.05
 -12  -3   6    3.93    0.89
  12  -3  -6    1.58    1.00
 -12   3   6    4.17    1.06
 -11  -3   6    2.22    0.77
  11  -3  -6    4.11    1.02
 -11   3   6    3.22    0.98
 -10  -3   6    1.61    0.68
  10  -3  -6    2.52    0.85
 -10   3   6    2.41    0.90
   9  -3  -6   12.63    1.28
  -9   3   6   15.33    1.29
   8  -3  -6    2.80    0.64
  -8  -3   6    3.15    0.78
  -8   3   6    4.37    0.81
   7  -3  -6   20.91    1.30
  -7   3   6   21.91    1.30
   6  -3  -6    0.93    0.65
   6   3  -6    1.57    0.55
  -6   3   6    1.68    0.64
   5  -3  -6   22.64    1.27
   5   3  -6   24.25    1.11
  -5   3   6   23.74    1.25
   4  -3  -6  150.82    5.06
  -4   3   6  153.26    5.04
   4   3  -6  151.00    4.94
   3  -3  -6   11.56    0.94
  -3   3   6   12.49    0.87
   3   3  -6   12.42    0.72
   2  -3  -6   14.25    0.94
  -2   3   6   10.19    0.74
   2   3  -6   13.64    0.63
   1  -3  -6    0.70    0.57
   1   3  -6    0.69    0.12
   1   3  -6    0.46    0.10
   0  -3  -6   18.31    1.03
  -1  -3  -6    7.07    0.67
  -2  -3  -6   11.77    0.89
  -3  -3  -6   16.88    1.02
  -3   3  -6   16.11    0.65
  -3   3  -6   15.64    0.65
  -4  -3  -6   10.79    0.96
  -4   3  -6   11.99    0.69
  -4   3  -6   12.73    0.67
  -5  -3  -6    9.74    1.07
  -5   3  -6    8.85    0.71
  -6  -3  -6    3.04    0.71
  -6   3  -6    1.01    0.50
  -7  -3  -6    1.26    0.73
  -7   3  -6    0.39    0.54
  -8  -3  -6   11.89    1.26
  -8   3  -6   11.40    1.08
  -9  -3  -6    0.99    0.85
  -9   3  -6    0.09    0.73
 -10  -3  -6    0.98    0.92
 -10   3  -6    1.41    0.84
 -11  -3  -6    0.01    0.95
 -11   3  -6    0.14    0.80
 -12  -3  -6    2.79    1.12
 -12   3  -6    3.40    0.97
 -13  -3  -6   12.37    1.46
 -13   3  -6   13.65    1.44
 -14  -3  -6    3.01    1.36
 -14   3  -6    2.77    1.28
 -15  -3  -6    0.05    1.28
 -15   3  -6    1.35    1.30
 -17   4   6   27.01    2.36
  16  -4  -6    2.32    1.50
 -16   4   6    0.44    1.23
  15  -4  -6   26.36    2.15
 -15  -4   6   27.07    2.20
 -15   4   6   31.70    2.18
  14  -4  -6    6.12    1.27
 -14  -4   6    6.65    1.13
 -14   4   6    6.01    1.33
 -13  -4   6   16.03    1.50
  13  -4  -6   14.02    1.44
 -13   4   6   21.66    1.88
 -12  -4   6   19.77    1.63
  12  -4  -6   24.81    1.81
 -12   4   6   26.00    1.85
  11  -4  -6    6.14    1.04
 -11  -4   6    4.18    0.87
 -11   4   6    6.11    1.11
  10  -4  -6   37.65    2.00
 -10   4   6   39.90    2.04
  -9  -4   6    2.65    0.82
   9  -4  -6    2.54    0.85
  -9   4   6    1.76    0.86
   8  -4  -6   67.94    2.73
  -8   4   6   70.20    2.73
   7  -4  -6   49.08    2.08
  -7   4   6   46.50    2.05
   6  -4  -6   64.23    2.45
  -6   4   6   62.35    2.43
   6   4  -6   60.52    2.36
   5  -4  -6   -0.12    0.47
   5   4  -6   -0.45    0.50
  -5   4   6   -0.01    0.63
   4  -4  -6  154.32    5.15
  -4   4   6  154.17    5.12
   4   4  -6  150.64    5.00
   3  -4  -6   65.69    2.44
  -3   4   6   64.39    2.40
   3   4  -6   64.59    2.23
   2  -4  -6  189.39    6.22
  -2   4   6  190.47    6.20
   2   4  -6  186.45    6.02
   1  -4  -6  132.44    4.41
  -1   4   6  131.00    4.38
   1   4  -6  127.88    4.14
   1   4  -6  130.81    4.15
   0  -4  -6    1.44    0.57
   0   4   6    2.41    0.55
  -1  -4  -6   85.92    3.04
  -2  -4  -6    3.53    0.66
  -3  -4  -6  142.92    4.93
  -3   4  -6  148.17    4.67
  -3   4  -6  148.18    4.67
  -4  -4  -6   43.61    1.88
  -4   4  -6   43.72    1.58
  -4   4  -6   44.42    1.57
  -5  -4  -6   28.87    1.52
  -5   4  -6   30.32    1.22
  -5   4  -6   29.02    1.23
  -6  -4  -6    3.65    0.80
  -6   4  -6    4.16    0.57
  -7  -4  -6    1.30    0.82
  -7   4  -6    0.56    0.57
  -8  -4  -6   48.15    2.21
  -8   4  -6   46.36    1.97
  -9  -4  -6   16.33    1.51
  -9   4  -6   13.96    1.24
 -10  -4  -6   26.35    1.85
 -10   4  -6   29.13    1.58
 -11  -4  -6    0.47    1.02
 -11   4  -6    2.17    0.87
 -12  -4  -6   24.52    1.93
 -12   4  -6   20.81    1.64
 -13  -4  -6    1.88    1.23
 -13   4  -6   -1.06    0.98
 -14  -4  -6    8.30    1.45
 -14   4  -6    8.42    1.32
 -15  -4  -6   21.71    2.16
 -15   4  -6   18.14    1.97
 -17   5   6    0.73    1.50
  16  -5  -6    1.53    1.37
 -16   5   6   -1.47    1.26
  15  -5  -6   -0.73    1.24
 -15   5   6    2.62    1.30
 -14  -5   6    0.82    0.96
  14  -5  -6    1.78    1.18
 -14   5   6    0.52    1.23
 -13  -5   6    1.94    0.92
  13  -5  -6    2.78    1.13
 -13   5   6    0.46    1.19
 -12  -5   6   -0.40    0.85
  12  -5  -6   -1.57    0.98
 -12   5   6    0.58    1.10
  11  -5  -6    4.03    1.03
 -11   5   6    3.41    1.13
  10  -5  -6   -0.42    0.91
 -10   5   6    0.10    0.97
   9  -5  -6    0.90    0.86
  -9   5   6    0.92    0.90
   8  -5  -6   11.89    1.27
  -8   5   6   10.49    1.12
   7  -5  -6    0.20    0.75
   7   5  -6    0.51    0.96
  -7   5   6   -1.01    0.75
   6  -5  -6    1.05    0.72
   6   5  -6    0.77    0.60
  -6   5   6    2.67    0.77
   5  -5  -6    0.46    0.68
  -5   5   6   -0.15    0.68
   5   5  -6    0.66    0.56
   4  -5  -6    2.18    0.70
   4   5  -6    2.27    0.50
  -4   5   6    2.28    0.70
   3  -5  -6    1.45    0.67
  -3   5   6   -0.34    0.62
   3   5  -6    0.92    0.42
   2  -5  -6   -0.11    0.46
   2   5  -6    0.11    0.35
  -2   5   6   -0.75    0.59
   1  -5  -6   12.22    0.88
   1   5  -6   12.04    0.64
   1   5  -6   13.33    0.64
  -1   5   6   11.68    0.99
   0  -5  -6    5.93    0.74
   0   5  -6    5.13    0.39
   0   5   6    6.17    0.73
   0   5  -6    4.88    0.42
  -1  -5  -6    3.42    0.71
  -1   5  -6    2.54    0.26
  -1   5  -6    2.58    0.25
  -2  -5  -6    3.54    0.71
  -2   5  -6    3.53    0.31
  -2   5  -6    3.63    0.39
  -3  -5  -6    9.91    1.05
  -3   5  -6   10.75    0.61
  -3   5  -6   10.52    0.61
  -4  -5  -6    0.72    0.69
  -4   5  -6    1.66    0.38
  -4   5  -6    1.63    0.41
  -5  -5  -6   12.05    1.18
  -5   5  -6   11.14    0.85
  -5   5  -6   12.72    0.81
  -6  -5  -6    0.51    0.78
  -6   5  -6    0.06    0.51
  -6   5  -6    1.07    0.54
  -7  -5  -6    2.63    0.91
  -7   5  -6    3.56    0.68
  -8  -5  -6    1.47    0.94
  -8   5  -6    2.27    0.74
  -9  -5  -6   -0.45    0.95
  -9   5  -6   -0.42    0.70
 -10  -5  -6   18.41    1.87
 -10   5  -6   17.81    1.48
 -11  -5  -6    0.45    1.15
 -11   5  -6   -0.85    0.90
 -12  -5  -6   -1.23    1.06
 -12   5  -6    1.56    0.94
 -13  -5  -6    1.08    1.25
 -13   5  -6    0.67    1.08
 -14  -5  -6   -0.25    1.30
 -14   5  -6   -0.98    1.22
 -16   6   6    0.08    1.52
  15  -6  -6   26.16    2.47
 -15   6   6   27.80    2.32
  14  -6  -6    0.81    1.19
 -14   6   6   -2.90    1.25
  13  -6  -6   38.74    2.32
 -13   6   6   43.51    2.67
  12  -6  -6    5.72    1.16
 -12   6   6    4.39    1.30
 -11  -6   6   12.27    1.94
  11  -6  -6   15.46    1.73
 -11   6   6   13.13    1.45
  10  -6  -6   28.00    1.80
 -10   6   6   25.14    1.90
   9  -6  -6    0.92    0.90
  -9   6   6   -0.03    0.95
   8  -6  -6   20.24    1.52
  -8   6   6   19.53    1.57
   7  -6  -6   -0.39    0.81
   7   6  -6    0.38    0.78
  -7   6   6   -0.70    0.82
   6  -6  -6   30.29    1.67
  -6   6   6   33.37    1.73
   6   6  -6   29.37    1.59
   5  -6  -6    4.49    0.82
  -5   6   6    3.89    0.84
   5   6  -6    5.15    0.72
   4  -6  -6  103.60    3.72
  -4   6   6  104.14    3.72
   4   6  -6  103.28    3.55
   3  -6  -6    3.51    0.79
  -3   6   6    6.04    0.82
   3   6  -6    3.51    0.56
   2  -6  -6   36.69    1.73
  -2   6   6   36.98    1.72
   2   6  -6   36.05    1.44
   1  -6  -6   95.26    3.37
   1   6  -6   91.33    3.09
  -1   6   6   91.72    3.34
   1   6  -6   92.98    3.09
   0  -6  -6    0.01    0.66
   0   6  -6   -0.30    0.35
   0   6   6    0.45    0.65
   0   6  -6   -0.40    0.34
  -1  -6  -6  132.98    4.56
  -1   6  -6  130.45    4.25
  -1   6  -6  131.46    4.26
  -2  -6  -6    6.61    0.86
  -2   6  -6    7.53    0.60
  -2   6  -6    5.35    0.58
  -3  -6  -6   38.96    1.84
  -3   6  -6   38.19    1.43
  -3   6  -6   37.62    1.44
  -4  -6  -6    9.59    1.02
  -4   6  -6   10.95    0.76
  -4   6  -6   10.79    0.77
  -5  -6  -6    5.19    0.95
  -5   6  -6    6.50    0.64
  -5   6  -6    8.35    0.77
  -6  -6  -6   18.31    1.50
  -6   6  -6   20.20    1.13
  -6   6  -6   19.08    1.14
  -7  -6  -6    3.75    0.99
  -7   6  -6    5.08    0.71
  -7   6  -6    3.65    0.69
  -8  -6  -6    0.24    0.98
  -8   6  -6    0.43    0.71
  -9  -6  -6    2.12    1.10
  -9   6  -6    3.63    0.84
 -10  -6  -6   32.28    2.10
 -10   6  -6   30.31    1.78
 -11  -6  -6    0.25    1.13
 -11   6  -6   -1.11    0.90
 -12  -6  -6    8.95    1.41
 -12   6  -6   11.58    1.24
 -13  -6  -6   17.95    1.97
 -13   6  -6   12.54    1.47
 -14  -6  -6    3.26    1.42
 -14   6  -6    1.78    1.27
 -16   7   6    1.97    1.48
 -15   7   6   -0.16    1.33
  14  -7  -6    5.25    1.33
 -14   7   6    1.97    1.40
  13  -7  -6    2.60    1.27
 -13   7   6    0.26    1.27
 -12  -7   6    5.81    1.09
  12  -7  -6    5.22    1.17
 -12   7   6    6.97    1.42
  11  -7  -6   10.76    1.26
 -11   7   6    9.00    1.45
  10  -7  -6   -0.85    0.93
 -10   7   6    0.68    1.13
   9  -7  -6    0.97    0.96
  -9   7   6    0.10    1.07
   8  -7  -6    5.82    1.05
  -8   7   6    5.34    1.11
   7  -7  -6    2.71    0.90
  -7   7   6    2.93    0.98
   7   7  -6    2.63    1.08
   6  -7  -6   10.37    1.08
  -6   7   6    9.64    1.10
   6   7  -6    8.63    0.94
   5  -7  -6    2.96    0.88
  -5   7   6    2.46    0.90
   5   7  -6    4.46    0.77
   4  -7  -6    7.47    0.96
   4   7  -6    6.23    0.74
  -4   7   6    6.47    0.96
   3  -7  -6   -0.51    0.73
  -3   7   6    0.78    0.80
   3   7  -6   -0.32    0.52
   2  -7  -6    7.12    0.91
   2   7  -6    7.04    0.75
  -2   7   6    6.86    0.94
   1  -7  -6    5.96    0.89
  -1   7   6    3.66    0.85
   1   7  -6    5.82    0.57
   1   7  -6    4.54    0.56
   0  -7  -6    5.99    0.76
   0   7  -6    5.28    0.56
   0   7   6    5.91    0.90
   0   7  -6    6.23    0.57
  -1  -7  -6    3.67    0.87
  -1   7  -6    3.27    0.51
  -1   7  -6    3.76    0.49
  -2  -7  -6   -0.08    0.75
  -2   7  -6    0.29    0.44
  -2   7  -6   -0.01    0.44
  -3  -7  -6   -1.20    0.79
  -3   7  -6    0.24    0.44
  -3   7  -6   -0.10    0.45
  -4  -7  -6    1.51    0.87
  -4   7  -6    2.06    0.52
  -4   7  -6    1.45    0.52
  -5  -7  -6   -0.31    0.90
  -5   7  -6    0.56    0.53
  -5   7  -6    0.99    0.55
  -6  -7  -6   -0.06    0.86
  -6   7  -6    0.27    0.61
  -6   7  -6    1.16    0.57
  -7  -7  -6    6.69    1.13
  -7   7  -6    5.33    0.78
  -7   7  -6    6.17    0.80
  -8  -7  -6    2.20    1.10
  -8   7  -6    1.55    0.75
  -8   7  -6    0.75    0.72
  -9  -7  -6    3.04    1.19
  -9   7  -6    2.97    0.86
 -10  -7  -6    2.43    1.16
 -10   7  -6   -0.46    0.82
 -11  -7  -6    0.35    1.20
 -11   7  -6    2.20    0.98
 -12  -7  -6    1.65    1.38
 -12   7  -6    0.28    1.06
 -13  -7  -6    7.42    1.48
 -13   7  -6    6.33    1.34
 -15   8   6   31.37    2.56
 -14   8   6    3.00    1.57
  13  -8  -6   19.16    1.92
 -13   8   6   14.38    1.68
  12  -8  -6    8.61    1.30
 -12   8   6    9.01    1.49
  11  -8  -6   19.94    1.77
 -11   8   6   17.87    1.96
  10  -8  -6   25.20    1.81
 -10   8   6   23.42    2.01
   9  -8  -6    6.42    1.09
  -9   8   6    2.88    1.23
   8  -8  -6   24.44    1.69
  -8   8   6   18.33    1.78
   7  -8  -6   -0.74    0.87
  -7   8   6   -2.20    0.97
   6  -8  -6    5.47    0.97
  -6   8   6    6.49    1.12
   6   8  -6    6.52    0.99
   5  -8  -6    2.81    0.93
   5   8  -6    2.14    0.80
  -5   8   6    1.75    0.97
   4  -8  -6    3.78    0.94
   4   8  -6    1.70    0.69
  -4   8   6    2.63    0.78
   3  -8  -6   39.37    1.95
   3   8  -6   39.90    1.73
  -3   8   6   37.85    2.00
   2  -8  -6   10.11    1.06
   2   8  -6    9.66    1.00
  -2   8   6    8.75    1.07
   1  -8  -6   40.58    1.94
  -1   8   6   37.83    1.78
   1   8  -6   35.59    1.61
   1   8  -6   38.91    1.59
   0  -8  -6    3.82    0.91
   0   8   6    2.16    0.89
   0   8  -6    2.57    0.58
   0   8  -6    3.17    0.58
  -1  -8  -6   91.72    3.42
  -1   8  -6   93.25    3.22
  -1   8  -6   94.48    3.21
  -2  -8  -6    3.46    0.90
  -2   8  -6    3.58    0.61
  -2   8  -6    3.97    0.60
  -3  -8  -6    6.55    1.01
  -3   8  -6    6.23    0.67
  -3   8  -6    6.27    0.68
  -4  -8  -6   13.42    1.24
  -4   8  -6   12.49    1.02
  -4   8  -6   11.48    0.98
  -5  -8  -6    5.37    1.06
  -5   8  -6    5.28    0.75
  -5   8  -6    6.37    0.74
  -6  -8  -6    2.69    1.07
  -6   8  -6    4.27    0.74
  -6   8  -6    4.16    0.75
  -7  -8  -6    2.09    1.13
  -7   8  -6    3.51    0.76
  -7   8  -6    1.10    0.74
  -8  -8  -6   11.41    1.44
  -8   8  -6   13.83    1.32
  -8   8  -6   14.15    1.44
  -9  -8  -6    2.19    1.25
  -9   8  -6    3.61    0.90
  -9   8  -6    3.81    0.96
 -10  -8  -6   30.59    2.16
 -10   8  -6   28.02    1.81
 -11  -8  -6    3.16    1.22
 -11   8  -6    0.92    1.05
 -12  -8  -6   30.90    2.30
 -12   8  -6   27.79    2.09
 -13  -8  -6   12.67    1.61
 -13   8  -6    9.71    1.54
 -14   9   6   10.81    1.72
 -13   9   6    0.98    1.42
  12  -9  -6    1.67    1.19
 -12   9   6    2.16    1.36
  11  -9  -6    0.52    1.10
 -11   9   6   -0.35    1.36
  10  -9  -6    1.18    1.06
 -10   9   6    1.23    1.24
   9  -9  -6    2.12    1.13
  -9   9   6    5.71    1.32
   8  -9  -6   -1.16    0.96
  -8   9   6   -2.33    1.10
   7  -9  -6    1.78    0.91
  -7   9   6    1.41    1.13
   6  -9  -6   -1.34    0.87
   6   9  -6    0.48    0.91
  -6   9   6   -1.11    1.02
   5  -9  -6   25.92    1.71
  -5   9   6   26.25    1.86
   5   9  -6   27.43    1.59
   4  -9  -6   21.28    1.65
  -4   9   6   24.77    1.79
   4   9  -6   25.28    1.56
   3  -9  -6    1.70    0.90
   3   9  -6    1.99    0.76
  -3   9   6    2.09    1.03
   2  -9  -6    1.12    0.90
   2   9  -6    0.83    0.65
  -2   9   6    1.38    0.94
   1  -9  -6   17.16    1.48
   1   9  -6   14.20    1.18
  -1   9   6   15.80    1.56
   1   9  -6   13.47    1.15
   0  -9  -6   13.52    1.46
   0   9  -6   15.97    1.16
   0   9  -6   16.48    1.10
   0   9   6   13.89    1.53
  -1  -9  -6   -0.72    0.89
  -1   9  -6   -0.74    0.60
  -1   9  -6    0.41    0.61
  -2  -9  -6   32.54    1.93
  -2   9  -6   33.64    1.57
  -2   9  -6   32.50    1.52
  -3  -9  -6   19.70    1.64
  -3   9  -6   18.55    1.26
  -3   9  -6   19.90    1.24
  -4  -9  -6    0.20    0.97
  -4   9  -6    0.84    0.66
  -4   9  -6    0.32    0.65
  -5  -9  -6    0.10    1.01
  -5   9  -6   -0.69    0.68
  -5   9  -6   -0.47    0.66
  -6  -9  -6    5.31    1.19
  -6   9  -6    5.83    0.88
  -6   9  -6    5.58    0.85
  -7  -9  -6    3.65    1.24
  -7   9  -6    2.99    0.90
  -7   9  -6    3.36    0.85
  -8  -9  -6    1.76    1.20
  -8   9  -6    2.73    0.95
  -8   9  -6    2.69    0.89
  -9  -9  -6    6.11    1.34
  -9   9  -6    3.22    1.10
  -9   9  -6    3.28    0.92
 -10  -9  -6    3.30    1.31
 -10   9  -6    2.93    1.03
 -11  -9  -6    8.82    1.45
 -11   9  -6    6.54    1.21
 -12  -9  -6    3.00    1.37
 -12   9  -6    0.74    1.24
 -13  10   6   33.98    2.57
 -12  10   6   13.67    1.73
 -11  10   6   51.04    2.89
  10 -10  -6    9.44    1.34
 -10  10   6    8.70    1.51
   9 -10  -6   -0.11    1.08
  -9  10   6    1.65    1.36
   8 -10  -6   36.67    2.17
  -8  10   6   39.37    2.41
   7 -10  -6    1.62    0.97
  -7  10   6    0.90    1.16
   6 -10  -6    2.30    1.04
   6  10  -6    1.24    1.07
  -6  10   6    1.74    1.22
   5 -10  -6    1.71    0.93
   5  10  -6    0.72    0.94
  -5  10   6    2.08    1.21
   4 -10  -6   34.85    1.99
  -4  10   6   37.36    2.22
   4  10  -6   36.16    1.97
   3 -10  -6    8.42    1.15
   3  10  -6    5.02    0.96
  -3  10   6    6.32    1.24
   2 -10  -6   80.54    3.30
  -2  10   6   88.77    3.44
   2  10  -6   79.79    3.10
   1 -10  -6   99.60    3.84
   1  10  -6   99.72    3.63
   1  10  -6  100.02    3.63
  -1  10   6  105.56    3.97
   0 -10  -6   -0.59    0.91
   0  10  -6   -0.18    0.73
   0  10   6   -0.64    1.06
   0  10  -6    0.10    0.69
  -1 -10  -6   19.09    1.63
  -1  10  -6   13.80    1.23
  -1  10  -6   16.61    1.23
  -2 -10  -6   -1.56    0.95
  -2  10  -6    0.17    0.68
  -2  10  -6    0.97    0.72
  -3 -10  -6   31.38    1.98
  -3  10  -6   27.30    1.54
  -3  10  -6   30.41    1.62
  -4 -10  -6    7.97    1.27
  -4  10  -6    6.49    0.93
  -4  10  -6    7.83    0.91
  -5 -10  -6    7.96    1.28
  -5  10  -6    8.04    0.96
  -5  10  -6   10.38    1.02
  -6 -10  -6   12.31    1.49
  -6  10  -6   14.14    1.33
  -6  10  -6   16.50    1.49
  -7 -10  -6    0.86    1.15
  -7  10  -6    2.89    0.91
  -7  10  -6    2.16    0.95
  -8 -10  -6   21.16    1.94
  -8  10  -6   22.23    1.83
  -8  10  -6   21.71    1.69
  -9 -10  -6   -0.76    1.14
  -9  10  -6   -0.55    0.95
 -10 -10  -6   15.28    1.63
 -10  10  -6   16.35    1.70
 -11 -10  -6   -1.21    1.32
 -11  10  -6    1.26    1.16
 -12  11   6    3.77    1.52
 -11  11   6   20.54    2.31
 -10  11   6    1.91    1.44
  -9  11   6    7.48    1.53
   8 -11  -6   -0.03    1.16
  -8  11   6   -1.68    1.35
   7 -11  -6   -1.47    1.00
  -7  11   6   -0.16    1.27
   6 -11  -6    2.53    1.07
  -6  11   6    3.00    1.31
   5 -11  -6   -1.12    0.97
   5  11  -6   -1.59    1.02
  -5  11   6   -0.67    1.18
   4 -11  -6   12.53    1.41
  -4  11   6   14.73    1.58
   4  11  -6   16.36    1.71
   3 -11  -6    3.20    1.13
   3  11  -6    3.55    1.06
  -3  11   6    3.72    1.26
   2 -11  -6   -0.38    0.95
   2  11  -6    0.88    0.93
  -2  11   6    2.48    1.22
   1 -11  -6    0.34    0.95
   1  11  -6    0.45    0.81
  -1  11   6    1.05    1.11
   1  11  -6    1.03    0.86
   0 -11  -6    5.04    1.12
   0  11   6    5.81    1.30
   0  11  -6    4.67    0.92
   0  11  -6    4.96    0.94
  -1 -11  -6    0.29    1.04
  -1  11  -6    1.39    0.79
  -1  11  -6    1.27    0.86
  -2 -11  -6    0.32    0.99
  -2  11  -6   -0.84    0.85
  -2  11  -6   -1.18    0.76
  -3 -11  -6    0.15    1.09
  -3  11  -6    1.88    0.90
  -3  11  -6    0.55    0.79
  -4 -11  -6    0.64    1.06
  -4  11  -6    0.60    0.90
  -4  11  -6    0.06    0.81
  -5 -11  -6    0.85    1.12
  -5  11  -6   -0.74    0.94
  -5  11  -6    0.86    0.87
  -6 -11  -6    1.00    1.19
  -6  11  -6    1.26    0.90
  -6  11  -6    1.66    1.01
  -7 -11  -6   -0.05    1.18
  -7  11  -6    0.50    0.97
  -8 -11  -6    2.94    1.36
  -8  11  -6    4.05    1.08
  -9 -11  -6   -1.65    1.25
  -9  11  -6   -0.50    1.03
 -10 -11  -6   -1.81    1.29
 -10  12   6   20.98    2.31
  -9  12   6    8.30    1.65
  -8  12   6    4.14    1.50
  -7  12   6    3.51    1.54
   6 -12  -6   18.47    1.82
  -6  12   6   14.02    1.68
   5 -12  -6   -0.17    1.08
  -5  12   6   -0.59    1.26
   4 -12  -6   22.34    2.05
  -4  12   6   22.70    2.08
   3 -12  -6    8.70    1.27
  -3  12   6    8.96    1.48
   3  12  -6    7.02    1.23
   2 -12  -6   19.97    2.01
   2  12  -6   17.94    1.56
  -2  12   6   20.99    2.08
   1 -12  -6   25.56    1.99
  -1  12   6   28.36    2.21
   1  12  -6   26.79    1.76
   1  12  -6   26.24    1.88
   0 -12  -6    2.38    1.28
   0  12  -6    3.95    1.05
   0  12   6    2.59    1.28
   0  12  -6    3.03    0.99
  -1 -12  -6   72.16    3.20
  -1  12  -6   72.55    3.06
  -1  12  -6   71.02    2.94
  -2 -12  -6   -0.84    1.13
  -2  12  -6    1.13    0.89
  -2  12  -6    0.11    0.98
  -3 -12  -6   15.21    1.68
  -3  12  -6   14.03    1.56
  -3  12  -6   15.96    1.65
  -4 -12  -6    3.63    1.33
  -4  12  -6    7.17    1.12
  -4  12  -6    5.76    1.05
  -5 -12  -6   11.60    1.59
  -5  12  -6    8.56    1.19
  -6 -12  -6    9.28    1.67
  -6  12  -6    8.72    1.22
  -7 -12  -6    2.26    1.42
  -7  12  -6    2.92    1.09
  -8 -12  -6    5.45    1.59
  -8  12  -6    7.69    1.29
  -8  13   6    2.04    1.48
  -7  13   6   -0.76    1.43
  -6  13   6    0.91    1.35
  -5  13   6    0.11    1.37
  -4  13   6    1.56    1.30
   3 -13  -6    1.51    1.24
  -3  13   6    1.61    1.33
   2 -13  -6    2.30    1.19
  -2  13   6    0.55    1.34
   1 -13  -6   12.35    1.51
  -1  13   6   12.55    1.68
   0 -13  -6    7.46    1.36
   0  13  -6    5.30    1.09
  -1 -13  -6   -0.93    1.20
  -1  13  -6    1.09    1.00
  -2 -13  -6    0.26    1.27
  -2  13  -6   -0.75    0.96
  -3 -13  -6    5.64    1.41
  -3  13  -6    2.32    1.07
  -4 -13  -6    1.61    1.40
  -4  13  -6   -1.46    1.04
  -5 -13  -6    0.84    1.42
  -5  13  -6    0.18    1.06
  -6 -13  -6    1.20    1.39
  -6  13  -6   -0.72    1.09
  -5  14   6    2.51    1.45
  -4  14   6    7.41    1.65
  -3  14   6   15.47    1.97
  -2  14   6   -0.87    1.38
  -1  14   6   22.68    2.26
   0  14  -6    5.59    1.25
  -1  14  -6   12.40    1.44
  -2  14  -6    0.43    1.18
  -3  14  -6   11.49    1.48
  18   0  -7    0.20    1.34
 -17   0   7    1.41    1.59
  17   0  -7   -1.46    1.26
  16   0  -7   -0.05    1.17
 -16   0   7   -1.44    1.25
 -15   0   7   -2.90    1.11
  15   0  -7   -0.50    1.13
  14   0  -7   -0.59    1.13
 -14   0   7    2.82    1.06
 -13   0   7   -2.17    0.84
  13   0  -7   -0.57    1.02
  12   0  -7   -1.56    0.94
 -12   0   7   -0.20    0.82
 -11   0   7   -0.23    0.76
  11   0  -7   -0.29    0.87
 -10   0   7   -0.40    0.70
  10   0  -7   -0.09    0.82
   9   0  -7    0.55    0.73
  -9   0   7   -0.14    0.61
  -8   0   7    0.83    0.47
   8   0  -7   -0.24    0.64
   7   0  -7   -0.47    0.65
  -6   0   7   -0.62    0.54
   6   0  -7    0.09    0.54
   5   0  -7   -0.35    0.52
   5   0  -7   -0.45    0.57
   4   0  -7   -0.01    0.50
   4   0  -7   -0.26    0.49
   3   0  -7    0.15    0.43
   3   0  -7   -0.71    0.42
   2   0  -7    0.09    0.39
   2   0  -7   -0.15    0.39
   1   0  -7   -0.19    0.36
   1   0  -7   -0.08    0.35
   0   0  -7   -0.32    0.33
   0   0  -7   -0.33    0.33
  -1   0  -7    0.03    0.33
  -2   0  -7   -0.52    0.33
  -3   0  -7   -0.49    0.40
  -4   0  -7   -0.15    0.42
  -5   0  -7   -0.29    0.47
  -6   0  -7   -0.04    0.57
  -7   0  -7   -0.62    0.55
  -8   0  -7   -0.74    0.67
  -9   0  -7   -0.37    0.76
 -10   0  -7   -0.50    0.88
 -11   0  -7    0.10    0.94
 -12   0  -7   -0.58    1.01
 -13   0  -7    0.75    1.01
 -14   0  -7    0.20    1.11
 -15   0  -7   -1.42    1.29
  18  -1  -7    1.34    1.45
  18   1  -7    2.01    1.42
 -17  -1   7    1.97    1.48
  17  -1  -7    9.72    1.58
  17   1  -7    6.89    1.41
 -17   1   7    8.23    1.64
  16  -1  -7    0.54    1.11
 -16  -1   7   -2.45    1.27
 -16   1   7    1.51    1.46
  16   1  -7   -1.07    1.26
 -15  -1   7   35.33    2.23
  15  -1  -7   35.08    2.33
  15   1  -7   37.72    2.34
 -15   1   7   34.35    2.46
  14  -1  -7    3.81    1.19
 -14  -1   7    3.10    1.07
  14   1  -7    2.41    1.16
 -14   1   7   -0.58    1.02
 -13  -1   7   46.30    2.23
  13  -1  -7   45.48    2.43
 -13   1   7   43.51    2.26
  13   1  -7   43.69    2.35
 -12  -1   7   34.02    1.87
  12  -1  -7   38.91    2.10
 -12   1   7   33.25    1.93
  12   1  -7   36.83    2.07
 -11  -1   7    1.46    0.76
  11  -1  -7    2.19    0.95
  11   1  -7   -0.36    0.89
 -11   1   7    1.34    0.86
 -10  -1   7  109.98    3.90
  10  -1  -7  110.47    4.00
 -10   1   7  106.93    3.91
  10   1  -7  107.07    3.96
   9  -1  -7   11.20    1.06
  -9   1   7    9.42    0.93
   8  -1  -7   45.90    2.05
  -8   1   7   49.69    1.98
  -7  -1   7   30.57    1.58
   7  -1  -7   30.55    1.54
  -7   1   7   31.54    1.40
   6  -1  -7   22.43    1.26
   6   1  -7   25.17    1.34
   5  -1  -7   97.30    3.50
   5   1  -7  102.77    3.45
  -5   1   7  104.98    3.55
   4  -1  -7    1.17    0.55
   4  -1  -7    0.30    0.51
   4   1  -7    1.84    0.48
   3  -1  -7   62.95    2.18
   3  -1  -7   59.05    2.17
   3   1  -7   59.81    2.12
   2  -1  -7   35.04    1.42
   2  -1  -7   34.12    1.42
   2   1  -7   35.39    1.30
   2   1  -7   34.88    1.30
   1  -1  -7    0.77    0.39
   1  -1  -7    1.11    0.40
   1   1  -7    0.76    0.30
   1   1  -7    0.67    0.29
   0  -1  -7    7.24    0.69
   0  -1  -7    8.85    0.69
   0   1  -7    7.73    0.49
  -1  -1  -7   17.55    0.92
  -1  -1  -7   18.95    0.93
  -1   1  -7   18.36    0.74
  -2  -1  -7   44.14    1.65
  -2   1  -7   43.12    1.52
  -3  -1  -7   34.32    1.42
  -3   1  -7   34.82    1.30
  -4  -1  -7  148.53    4.83
  -4   1  -7  142.42    4.74
  -5  -1  -7    4.96    0.66
  -5   1  -7    4.74    0.55
  -6  -1  -7   90.03    3.22
  -6   1  -7   89.74    3.15
  -7  -1  -7   21.47    1.27
  -7   1  -7   19.06    1.20
  -8  -1  -7   63.20    2.54
  -8   1  -7   65.44    2.51
  -9  -1  -7    9.33    1.09
  -9   1  -7    7.84    0.96
 -10  -1  -7   16.90    1.41
 -10   1  -7   15.56    1.34
 -11  -1  -7   12.91    1.44
 -11   1  -7    9.95    1.17
 -12  -1  -7    8.75    1.20
 -12   1  -7    6.26    1.20
 -13  -1  -7   13.90    1.49
 -13   1  -7   11.86    1.37
 -14  -1  -7    0.01    1.13
 -14   1  -7   -1.82    1.19
 -15  -1  -7   23.21    2.13
 -15   1  -7   20.03    2.03
  17  -2  -7    0.89    1.36
 -17   2   7    0.72    1.49
  17   2  -7   -0.60    1.27
  16  -2  -7    4.26    1.31
 -16  -2   7    7.81    1.40
  16   2  -7    4.16    1.34
 -16   2   7    3.87    1.50
 -15  -2   7    2.60    1.16
  15  -2  -7    3.98    1.27
 -15   2   7    4.34    1.33
  15   2  -7    3.61    1.27
 -14  -2   7    2.72    1.17
  14  -2  -7    1.29    1.20
 -14   2   7   -0.79    1.12
  14   2  -7    1.10    1.13
 -13  -2   7   14.94    1.47
  13  -2  -7   15.72    1.75
 -13   2   7   15.63    1.48
  13   2  -7   15.66    1.72
 -12  -2   7   25.15    1.61
  12  -2  -7   25.03    1.85
 -12   2   7   28.95    1.79
  11  -2  -7   15.10    1.25
 -11  -2   7   15.24    1.26
 -11   2   7   14.82    1.42
  10  -2  -7    2.77    0.91
 -10   2   7    2.91    0.85
   9  -2  -7    8.62    1.02
  -9   2   7   10.24    1.14
   8  -2  -7    9.58    0.95
  -8  -2   7    8.80    1.38
  -8   2   7    9.77    1.05
   7  -2  -7   15.58    1.20
  -7   2   7   16.32    1.12
   6  -2  -7   16.55    1.13
   6   2  -7   15.74    1.10
  -6   2   7   14.79    1.00
   5  -2  -7    0.09    0.56
   5   2  -7    0.02    0.49
  -5   2   7    0.13    0.30
   4  -2  -7    2.86    0.60
   4   2  -7    3.89    0.50
   3  -2  -7   52.43    1.99
  -3   2   7   53.79    1.98
   3   2  -7   51.75    1.85
   2  -2  -7    9.20    0.93
   2  -2  -7    9.96    0.79
   2   2  -7    9.25    0.57
   1  -2  -7    2.00    0.49
   1  -2  -7    1.96    0.51
   1   2  -7    2.32    0.25
   0  -2  -7   19.14    1.07
   0  -2  -7   19.70    1.07
  -1  -2  -7   24.60    1.22
  -1  -2  -7   26.65    1.23
  -2  -2  -7    0.40    0.49
  -2  -2  -7    1.42    0.53
  -2   2  -7    1.71    0.21
  -3  -2  -7    1.36    0.55
  -3   2  -7    1.90    0.30
  -4  -2  -7   -0.30    0.51
  -4   2  -7    0.71    0.36
  -5  -2  -7    1.64    0.57
  -5   2  -7    1.73    0.46
  -6  -2  -7    0.57    0.69
  -6   2  -7   -0.13    0.48
  -7  -2  -7    4.78    0.86
  -7   2  -7    3.69    0.64
  -8  -2  -7    0.17    0.85
  -8   2  -7    0.38    0.68
  -9  -2  -7    8.95    1.05
  -9   2  -7    9.29    0.99
 -10  -2  -7   -0.10    0.86
 -10   2  -7   -0.22    0.83
 -11  -2  -7    1.92    1.07
 -11   2  -7    2.33    0.87
 -12  -2  -7    0.03    0.97
 -12   2  -7    1.14    0.99
 -13  -2  -7    2.00    1.13
 -13   2  -7   -0.95    0.94
 -14  -2  -7    2.86    1.25
 -14   2  -7    1.28    1.23
 -15  -2  -7    0.37    1.41
 -15   2  -7    1.16    1.22
  17  -3  -7   34.35    2.56
  17   3  -7   30.95    2.39
 -17   3   7   35.76    2.59
  16  -3  -7    2.88    1.41
 -16   3   7    3.73    1.47
  16   3  -7    4.25    1.31
 -15  -3   7    8.57    1.22
  15  -3  -7    3.43    1.31
 -15   3   7    4.53    1.38
  14  -3  -7   26.60    2.08
 -14  -3   7   30.20    2.02
 -14   3   7   30.18    2.11
  13  -3  -7    2.89    1.14
 -13  -3   7    3.67    1.04
 -13   3   7    4.63    1.18
 -12  -3   7   34.39    1.90
  12  -3  -7   31.93    1.82
 -12   3   7   36.04    2.01
  11  -3  -7    4.11    1.01
 -11   3   7    2.78    1.04
  10  -3  -7   68.69    2.87
 -10   3   7   72.25    2.85
   9  -3  -7   22.06    1.52
  -9  -3   7   25.18    2.01
  -9   3   7   21.27    1.46
   8  -3  -7   39.03    1.88
  -8   3   7   38.31    1.81
   7  -3  -7   79.76    3.07
  -7   3   7   82.40    3.02
   7   3  -7   84.40    3.04
   6  -3  -7  110.97    3.89
   6   3  -7  109.39    3.79
  -6   3   7  111.22    3.84
   5  -3  -7   60.13    2.37
  -5   3   7   62.73    2.31
   5   3  -7   60.84    2.23
   4  -3  -7   21.16    1.22
  -4   3   7   21.46    1.12
   4   3  -7   21.11    1.04
   3  -3  -7  220.74    7.29
   3   3  -7  225.97    7.13
   2  -3  -7   10.72    0.91
   2   3  -7   10.41    0.57
   1  -3  -7  326.32   10.27
  -1   3   7  314.20   10.38
   1   3  -7  317.10   10.00
   0  -3  -7   37.10    1.61
  -1  -3  -7  134.18    4.50
  -2  -3  -7   39.06    1.63
  -3  -3  -7   28.93    1.36
  -3   3  -7   28.53    1.00
  -3   3  -7   27.09    0.99
  -4  -3  -7   46.10    1.84
  -4   3  -7   42.31    1.56
  -5  -3  -7    0.64    0.69
  -5   3  -7    1.63    0.45
  -6  -3  -7   63.97    2.48
  -6   3  -7   61.67    2.28
  -7  -3  -7    2.42    0.78
  -7   3  -7    3.37    0.65
  -8  -3  -7   22.50    1.67
  -8   3  -7   23.00    1.38
  -9  -3  -7    8.21    1.08
  -9   3  -7    7.64    0.91
 -10  -3  -7   11.02    1.21
 -10   3  -7    9.36    1.07
 -11  -3  -7    8.90    1.21
 -11   3  -7    8.81    1.03
 -12  -3  -7    2.70    1.10
 -12   3  -7    3.77    1.05
 -13  -3  -7   -0.12    1.13
 -13   3  -7    2.76    1.15
 -14  -3  -7    0.26    1.20
 -14   3  -7    2.22    1.10
  17  -4  -7   -0.71    1.48
  17   4  -7   -1.30    1.24
 -17   4   7    1.40    1.43
  16  -4  -7    1.17    1.37
 -16   4   7   -0.09    1.36
  15  -4  -7    5.60    1.34
 -15   4   7    5.85    1.43
 -14  -4   7    4.27    1.11
  14  -4  -7    2.76    1.18
 -14   4   7    4.96    1.34
 -13  -4   7   -2.15    0.86
  13  -4  -7   -1.44    1.06
 -13   4   7   -0.51    1.09
  12  -4  -7    0.62    1.04
 -12  -4   7   -0.86    0.80
 -12   4   7    1.89    1.06
  11  -4  -7   -1.24    0.90
 -11   4   7   -0.09    0.95
  10  -4  -7    2.91    0.97
 -10   4   7    3.94    1.00
   9  -4  -7   10.43    1.09
  -9   4   7    9.30    1.07
   8  -4  -7   21.43    1.47
  -8   4   7   19.59    1.41
   7  -4  -7    2.23    0.79
   7   4  -7    1.74    0.77
  -7   4   7    2.38    0.76
   6  -4  -7    7.75    0.93
  -6   4   7    8.53    0.92
   6   4  -7   10.30    0.97
   5  -4  -7    7.39    0.85
   5   4  -7    7.23    0.81
  -5   4   7    6.23    0.78
   4  -4  -7   31.89    1.56
   4   4  -7   31.44    1.33
  -4   4   7   32.25    1.50
   3  -4  -7   -0.46    0.56
   3   4  -7   -0.19    0.36
  -3   4   7   -0.41    0.54
   2  -4  -7   46.33    1.92
   2   4  -7   47.72    1.63
  -2   4   7   46.90    1.85
   1  -4  -7   18.67    1.14
  -1   4   7   15.90    0.96
   1   4  -7   18.05    0.66
   1   4  -7   19.61    0.68
   0  -4  -7    0.39    0.59
  -1  -4  -7    0.87    0.58
  -2  -4  -7    7.16    0.79
  -3  -4  -7   -0.28    0.60
  -3   4  -7    0.65    0.23
  -3   4  -7    0.03    0.22
  -4  -4  -7   15.20    1.20
  -4   4  -7   18.49    0.82
  -4   4  -7   17.34    0.81
  -5  -4  -7   -0.08    0.67
  -5   4  -7   -0.27    0.41
  -6  -4  -7   11.89    1.22
  -6   4  -7   13.64    0.93
  -7  -4  -7    2.69    0.87
  -7   4  -7    3.81    0.66
  -8  -4  -7    0.84    0.88
  -8   4  -7    2.53    0.69
  -9  -4  -7    4.99    1.05
  -9   4  -7    3.68    0.82
 -10  -4  -7    0.13    0.95
 -10   4  -7    0.37    0.79
 -11  -4  -7    0.66    1.02
 -11   4  -7    0.00    0.80
 -12  -4  -7    1.35    1.10
 -12   4  -7    1.58    0.93
 -13  -4  -7   -0.34    1.18
 -13   4  -7    0.95    1.00
 -14  -4  -7    2.05    1.36
 -14   4  -7    2.79    1.28
  16  -5  -7   16.26    1.87
 -16   5   7   16.66    1.80
  15  -5  -7    1.16    1.37
 -15   5   7    3.58    1.28
  14  -5  -7   17.86    1.95
 -14   5   7   15.82    1.67
  13  -5  -7    7.54    1.35
 -13   5   7    9.80    1.39
  12  -5  -7   56.27    2.75
 -12   5   7   60.27    2.81
  11  -5  -7    6.65    1.17
 -11   5   7    7.79    1.25
  10  -5  -7   14.63    1.55
 -10   5   7   16.75    1.61
   9  -5  -7   14.89    1.51
  -9   5   7   18.90    1.53
   8  -5  -7   18.24    1.45
  -8   5   7   15.85    1.43
   7  -5  -7   12.44    1.30
   7   5  -7   13.16    1.24
  -7   5   7   11.19    1.11
   6  -5  -7   23.38    1.30
   6   5  -7   23.79    1.32
  -6   5   7   23.41    1.45
   5  -5  -7   41.15    1.89
   5   5  -7   38.21    1.66
  -5   5   7   43.12    1.88
   4  -5  -7   30.36    1.59
   4   5  -7   31.41    1.34
  -4   5   7   32.21    1.57
   3  -5  -7   23.86    1.41
  -3   5   7   24.14    1.36
   3   5  -7   26.27    1.11
   2  -5  -7    2.97    0.73
   2   5  -7    2.85    0.40
  -2   5   7    2.91    0.69
   1  -5  -7   83.07    3.05
   1   5  -7   83.10    2.71
  -1   5   7   83.91    3.00
   1   5  -7   81.81    2.70
   0  -5  -7   80.25    2.99
   0   5  -7   84.95    2.61
   0   5  -7   79.12    2.61
  -1  -5  -7   30.05    1.52
  -1   5  -7   29.98    0.97
  -1   5  -7   29.22    0.97
  -2  -5  -7   62.11    2.46
  -2   5  -7   60.00    1.96
  -2   5  -7   59.77    1.96
  -3  -5  -7   18.92    1.29
  -3   5  -7   20.26    0.76
  -3   5  -7   15.99    0.75
  -4  -5  -7   95.75    3.93
  -4   5  -7  119.31    3.64
  -4   5  -7  116.52    3.65
  -5  -5  -7    4.30    0.84
  -5   5  -7    4.01    0.52
  -5   5  -7    3.35    0.50
  -6  -5  -7   21.59    1.52
  -6   5  -7   23.46    1.17
  -6   5  -7   20.28    1.16
  -7  -5  -7   -0.84    0.85
  -7   5  -7   -0.35    0.59
  -8  -5  -7    0.03    0.92
  -8   5  -7    0.59    0.70
  -9  -5  -7    6.42    1.26
  -9   5  -7    8.14    0.94
 -10  -5  -7   -0.15    1.03
 -10   5  -7   -0.54    0.82
 -11  -5  -7   20.89    1.89
 -11   5  -7   24.50    1.70
 -12  -5  -7   -1.31    1.11
 -12   5  -7    0.40    1.00
 -13  -5  -7   20.41    2.28
 -13   5  -7   20.79    1.75
 -14  -5  -7   -0.42    1.28
 -14   5  -7    2.21    1.26
 -16   6   7   -1.11    1.37
  15  -6  -7   -0.67    1.49
 -15   6   7   -0.07    1.24
  14  -6  -7   -1.17    1.18
 -14   6   7   -2.00    1.10
  13  -6  -7   -0.49    1.13
 -13   6   7   -0.18    1.27
  12  -6  -7    2.61    1.17
 -12   6   7    2.57    1.25
  11  -6  -7    3.56    1.09
 -11   6   7    2.86    1.19
  10  -6  -7    0.17    0.99
 -10   6   7   -1.01    1.03
   9  -6  -7    1.24    0.96
  -9   6   7   -0.40    0.98
   8  -6  -7   15.77    1.52
  -8   6   7   16.97    1.53
   7  -6  -7   -1.31    0.79
   7   6  -7    0.27    0.81
  -7   6   7   -0.13    0.87
   6  -6  -7   -0.42    0.75
   6   6  -7   -0.08    0.65
  -6   6   7   -0.28    0.81
   5  -6  -7   25.97    1.53
   5   6  -7   23.63    1.29
  -5   6   7   23.87    1.52
   4  -6  -7    0.51    0.74
   4   6  -7   -0.61    0.50
  -4   6   7    0.00    0.73
   3  -6  -7    0.97    0.60
  -3   6   7    1.26    0.74
   3   6  -7    0.72    0.47
   2  -6  -7   20.50    1.39
   2   6  -7   21.31    1.00
  -2   6   7   19.47    1.32
   1  -6  -7   24.06    1.33
   1   6  -7   26.60    1.09
   1   6  -7   26.71    1.08
  -1   6   7   27.93    1.57
   0  -6  -7    5.32    0.83
   0   6   7    3.92    0.78
   0   6  -7    3.39    0.38
   0   6  -7    4.30    0.39
  -1  -6  -7   13.09    1.23
  -1   6  -7   13.44    0.65
  -1   6  -7   12.41    0.64
  -2  -6  -7   -1.15    0.73
  -2   6  -7   -0.20    0.29
  -2   6  -7   -0.04    0.31
  -3  -6  -7    1.57    0.77
  -3   6  -7    1.71    0.37
  -3   6  -7    1.12    0.36
  -4  -6  -7   13.20    1.31
  -4   6  -7   10.91    0.79
  -4   6  -7   11.08    0.76
  -5  -6  -7   26.19    1.69
  -5   6  -7   27.47    1.25
  -5   6  -7   27.96    1.25
  -6  -6  -7   18.29    1.54
  -6   6  -7   20.48    1.14
  -6   6  -7   19.13    1.16
  -7  -6  -7    0.15    0.94
  -7   6  -7    1.29    0.66
  -7   6  -7    0.57    0.64
  -8  -6  -7    8.43    1.23
  -8   6  -7    8.49    0.88
  -9  -6  -7    3.95    1.15
  -9   6  -7    3.10    0.84
 -10  -6  -7    1.35    1.08
 -10   6  -7    0.69    0.84
 -11  -6  -7    0.73    1.20
 -11   6  -7    0.25    0.93
 -12  -6  -7   -0.85    1.18
 -12   6  -7    0.22    1.04
 -13  -6  -7    2.47    1.34
 -13   6  -7    1.18    1.13
 -15   7   7   22.12    2.24
  14  -7  -7   30.59    2.30
 -14   7   7   22.62    2.19
  13  -7  -7    1.95    1.33
 -13   7   7    1.02    1.28
  12  -7  -7   39.33    2.32
 -12   7   7   37.51    2.40
  11  -7  -7    2.31    1.12
 -11   7   7   -0.19    1.32
  10  -7  -7   38.71    2.24
 -10   7   7   42.35    2.34
   9  -7  -7   10.32    1.26
  -9   7   7    7.43    1.29
   8  -7  -7   17.37    1.61
  -8   7   7   19.48    1.66
   7  -7  -7    8.35    1.13
  -7   7   7    9.63    1.19
   7   7  -7    8.55    1.00
   6  -7  -7   -0.88    0.82
   6   7  -7   -0.64    0.77
  -6   7   7    1.18    0.91
   5  -7  -7   75.48    2.99
   5   7  -7   75.42    2.79
  -5   7   7   72.09    2.96
   4  -7  -7    9.94    1.07
   4   7  -7    8.95    0.82
  -4   7   7    9.88    1.09
   3  -7  -7   90.01    3.41
  -3   7   7   88.43    3.39
   3   7  -7   92.42    3.16
   2  -7  -7    5.53    0.93
   2   7  -7    5.92    0.61
  -2   7   7    5.14    0.90
   1  -7  -7    9.89    1.00
   1   7  -7   10.23    0.80
   1   7  -7   10.49    0.81
  -1   7   7   13.00    1.21
   0  -7  -7    6.40    0.95
   0   7  -7    6.37    0.56
   0   7  -7    5.80    0.55
   0   7   7    5.88    0.89
  -1  -7  -7  123.00    4.35
  -1   7  -7  121.01    3.99
  -1   7  -7  121.34    4.00
  -2  -7  -7  105.05    3.85
  -2   7  -7  103.01    3.46
  -2   7  -7  104.62    3.46
  -3  -7  -7    1.39    0.84
  -3   7  -7    0.29    0.44
  -3   7  -7    1.01    0.43
  -4  -7  -7   49.39    2.36
  -4   7  -7   51.16    1.91
  -4   7  -7   52.64    1.92
  -5  -7  -7    6.64    1.10
  -5   7  -7    7.50    0.69
  -5   7  -7    9.06    0.86
  -6  -7  -7    3.66    1.03
  -6   7  -7    3.62    0.67
  -6   7  -7    3.66    0.68
  -7  -7  -7    5.65    1.16
  -7   7  -7    6.36    0.81
  -7   7  -7    7.60    0.84
  -8  -7  -7   35.67    2.20
  -8   7  -7   36.64    1.85
  -8   7  -7   36.27    1.74
  -9  -7  -7   27.42    2.05
  -9   7  -7   26.54    1.58
 -10  -7  -7    6.48    1.32
 -10   7  -7    6.03    0.98
 -11  -7  -7   11.01    1.48
 -11   7  -7   11.44    1.25
 -12  -7  -7    1.83    1.28
 -12   7  -7    0.02    1.08
 -13  -7  -7   11.58    1.74
 -13   7  -7    9.99    1.42
 -15   8   7    0.63    1.44
 -14   8   7    1.93    1.41
  13  -8  -7    4.87    1.41
 -13   8   7    6.16    1.64
  12  -8  -7   -0.90    1.27
 -12   8   7    0.56    1.31
  11  -8  -7    5.01    1.25
 -11   8   7    1.70    1.28
  10  -8  -7    3.34    1.11
 -10   8   7    4.29    1.30
   9  -8  -7   17.49    1.65
  -9   8   7   13.28    1.50
   8  -8  -7    0.03    0.97
  -8   8   7   -0.64    1.10
   7  -8  -7    9.91    1.23
  -7   8   7   11.05    1.30
   7   8  -7   10.07    1.21
   6  -8  -7   13.10    1.29
   6   8  -7   13.07    1.24
  -6   8   7   12.66    1.33
   5  -8  -7   30.02    1.82
  -5   8   7   31.14    1.85
   5   8  -7   25.57    1.47
   4  -8  -7    0.96    0.71
  -4   8   7   -0.41    0.92
   4   8  -7    1.52    0.69
   3  -8  -7    5.16    0.99
  -3   8   7    6.73    1.03
   3   8  -7    4.72    0.72
   2  -8  -7    1.32    0.87
  -2   8   7    3.84    0.97
   2   8  -7    2.23    0.59
   1  -8  -7    0.46    0.80
   1   8  -7    0.70    0.54
  -1   8   7    0.36    0.88
   1   8  -7    0.84    0.53
   0  -8  -7    0.47    0.83
   0   8  -7    1.36    0.53
   0   8   7    1.78    0.87
   0   8  -7    1.03    0.51
  -1  -8  -7    0.59    0.87
  -1   8  -7    0.52    0.50
  -1   8  -7    1.14    0.51
  -2  -8  -7   10.75    1.20
  -2   8  -7   12.23    0.92
  -2   8  -7   11.40    0.92
  -3  -8  -7    8.31    1.13
  -3   8  -7   11.17    0.93
  -3   8  -7   11.83    0.93
  -4  -8  -7    0.06    0.94
  -4   8  -7   -0.30    0.55
  -4   8  -7   -0.08    0.55
  -5  -8  -7   -1.83    0.95
  -5   8  -7    1.01    0.61
  -5   8  -7    0.58    0.59
  -6  -8  -7    3.57    1.10
  -6   8  -7    0.83    0.68
  -6   8  -7    2.10    0.69
  -7  -8  -7    3.48    1.16
  -7   8  -7    2.93    0.76
  -7   8  -7    3.84    0.83
  -8  -8  -7    0.41    1.11
  -8   8  -7    0.89    0.78
  -8   8  -7    0.47    0.85
  -9  -8  -7   -1.29    1.14
  -9   8  -7   -0.73    0.81
  -9   8  -7    0.20    0.97
 -10  -8  -7   -1.08    1.26
 -10   8  -7   -0.70    0.92
 -11  -8  -7    0.59    1.30
 -11   8  -7    2.16    1.03
 -12  -8  -7    0.07    1.25
 -12   8  -7   -0.58    1.10
 -14   9   7   10.17    1.68
 -13   9   7   10.93    1.66
  12  -9  -7   32.42    2.37
 -12   9   7   32.10    2.47
  11  -9  -7    2.83    1.24
 -11   9   7   -0.82    1.27
  10  -9  -7   21.69    1.95
 -10   9   7   20.00    2.08
   9  -9  -7   -2.48    0.99
  -9   9   7    0.04    1.21
   8  -9  -7   19.91    1.74
  -8   9   7   17.44    1.89
   7  -9  -7    6.51    1.14
   7   9  -7    6.85    1.10
  -7   9   7    6.68    1.29
   6  -9  -7    6.11    1.11
   6   9  -7    4.36    1.01
  -6   9   7    2.63    1.19
   5  -9  -7    2.58    1.04
  -5   9   7    2.56    1.14
   5   9  -7    3.43    0.90
   4  -9  -7    2.42    1.00
   4   9  -7    1.78    0.76
  -4   9   7    2.07    1.05
   3  -9  -7   14.16    1.51
  -3   9   7   15.63    1.61
   3   9  -7   17.23    1.31
   2  -9  -7    1.64    0.95
   2   9  -7    1.53    0.68
  -2   9   7    1.71    1.02
   1  -9  -7   97.83    3.74
   1   9  -7   98.05    3.43
  -1   9   7   96.64    3.75
   1   9  -7   95.67    3.41
   0  -9  -7   20.43    1.65
   0   9  -7   18.80    1.19
   0   9  -7   19.40    1.20
   0   9   7   18.29    1.63
  -1  -9  -7   39.73    2.16
  -1   9  -7   41.66    1.73
  -1   9  -7   40.70    1.76
  -2  -9  -7   34.67    2.04
  -2   9  -7   35.44    1.63
  -2   9  -7   35.01    1.58
  -3  -9  -7   15.63    1.58
  -3   9  -7   13.58    1.12
  -3   9  -7   12.90    1.10
  -4  -9  -7   24.59    1.88
  -4   9  -7   28.13    1.43
  -4   9  -7   25.30    1.40
  -5  -9  -7    1.38    1.06
  -5   9  -7    1.50    0.72
  -5   9  -7    1.43    0.70
  -6  -9  -7   25.34    1.94
  -6   9  -7   23.46    1.44
  -6   9  -7   22.81    1.48
  -7  -9  -7    1.66    1.15
  -7   9  -7    1.38    0.78
  -7   9  -7    1.32    0.82
  -8  -9  -7   14.92    1.67
  -8   9  -7   15.16    1.59
  -8   9  -7   16.31    1.36
  -9  -9  -7    9.31    1.46
  -9   9  -7    8.56    1.08
  -9   9  -7    7.65    1.19
 -10  -9  -7    7.72    1.47
 -10   9  -7    6.92    1.11
 -11  -9  -7   11.54    1.62
 -11   9  -7   11.35    1.34
 -13  10   7    2.88    1.55
 -12  10   7    1.44    1.40
  11 -10  -7    2.43    1.23
 -11  10   7   -1.15    1.29
  10 -10  -7   -0.10    1.18
 -10  10   7   -0.61    1.30
   9 -10  -7   -1.88    1.10
  -9  10   7    4.57    1.38
   8 -10  -7    0.88    1.12
  -8  10   7    3.49    1.33
   7 -10  -7   -0.68    1.03
   7  10  -7    0.00    1.07
  -7  10   7   -0.29    1.18
   6 -10  -7    7.23    1.21
  -6  10   7    9.76    1.39
   6  10  -7    5.75    1.14
   5 -10  -7    0.00    1.08
  -5  10   7   -0.84    1.16
   5  10  -7    0.72    0.87
   4 -10  -7   -1.47    0.96
   4  10  -7    0.38    0.89
  -4  10   7    0.12    1.14
   3 -10  -7    3.63    1.14
   3  10  -7    2.76    0.89
  -3  10   7    4.08    1.18
   2 -10  -7    7.45    1.19
  -2  10   7    6.61    1.22
   2  10  -7    4.66    0.87
   1 -10  -7    3.30    1.08
  -1  10   7    0.28    1.08
   1  10  -7    1.14    0.74
   1  10  -7    1.29    0.72
   0 -10  -7   15.85    1.65
   0  10   7   17.85    1.71
   0  10  -7   16.03    1.25
   0  10  -7   14.67    1.19
  -1 -10  -7    0.19    1.04
  -1  10  -7   -0.69    0.66
  -1  10  -7    0.64    0.69
  -2 -10  -7   -0.37    1.05
  -2  10  -7   -0.41    0.69
  -2  10  -7   -0.63    0.71
  -3 -10  -7    2.28    1.11
  -3  10  -7   -0.25    0.69
  -3  10  -7    1.39    0.75
  -4 -10  -7    1.55    1.10
  -4  10  -7    0.92    0.75
  -4  10  -7    1.40    0.78
  -5 -10  -7    3.91    1.22
  -5  10  -7    2.43    0.85
  -5  10  -7    3.03    0.80
  -6 -10  -7   -0.01    1.10
  -6  10  -7   -1.18    0.76
  -6  10  -7   -0.20    0.84
  -7 -10  -7    1.54    1.24
  -7  10  -7   -0.13    0.83
  -7  10  -7    1.54    0.96
  -8 -10  -7    1.07    1.32
  -8  10  -7    1.47    1.04
  -8  10  -7    0.09    0.92
  -9 -10  -7   -0.73    1.24
  -9  10  -7   -0.07    0.95
 -10 -10  -7    0.76    1.29
 -10  10  -7    0.60    1.07
 -11  11   7   -0.73    1.34
 -10  11   7   32.82    2.49
   9 -11  -7    3.22    1.31
  -9  11   7    5.05    1.42
   8 -11  -7   18.59    1.90
  -8  11   7   15.36    1.75
   7 -11  -7    0.19    1.15
  -7  11   7    1.22    1.31
   6 -11  -7   16.73    1.80
  -6  11   7   14.30    1.65
   5 -11  -7   -0.80    1.03
  -5  11   7   -0.24    1.33
   5  11  -7    1.21    0.99
   4 -11  -7    9.07    1.33
   4  11  -7   11.40    1.25
  -4  11   7   11.23    1.50
   3 -11  -7    7.84    1.24
   3  11  -7    6.46    1.10
  -3  11   7    9.25    1.44
   2 -11  -7   -2.29    1.00
  -2  11   7    0.60    1.21
   2  11  -7    0.62    0.86
   1 -11  -7   44.52    2.31
   1  11  -7   38.74    1.95
   1  11  -7   40.58    1.97
  -1  11   7   35.79    2.32
   0 -11  -7    1.87    1.13
   0  11  -7    2.54    0.83
   0  11  -7    2.96    0.90
  -1 -11  -7   29.54    2.06
  -1  11  -7   26.06    1.61
  -1  11  -7   26.42    1.63
  -2 -11  -7    8.62    1.34
  -2  11  -7    7.39    0.96
  -2  11  -7    8.12    1.03
  -3 -11  -7    5.05    1.25
  -3  11  -7    4.91    0.88
  -3  11  -7    5.59    0.97
  -4 -11  -7   22.39    1.94
  -4  11  -7   21.94    1.47
  -4  11  -7   20.96    1.65
  -5 -11  -7    3.37    1.17
  -5  11  -7    1.02    0.86
  -5  11  -7    0.77    0.96
  -6 -11  -7   11.49    1.46
  -6  11  -7   15.05    1.55
  -6  11  -7   13.07    1.39
  -7 -11  -7    2.36    1.19
  -7  11  -7    0.91    0.93
  -8 -11  -7    4.83    1.36
  -8  11  -7    5.12    1.11
  -9 -11  -7    3.33    1.46
  -9  11  -7   -0.12    1.07
 -10  12   7    5.85    1.67
  -9  12   7   -1.12    1.42
  -8  12   7    2.39    1.43
   7 -12  -7   -0.12    1.11
  -7  12   7    0.18    1.32
   6 -12  -7    1.66    1.37
  -6  12   7    1.11    1.38
   5 -12  -7   -2.70    1.13
  -5  12   7    1.06    1.32
   4 -12  -7    1.51    1.23
  -4  12   7    1.80    1.44
   3 -12  -7   14.70    1.53
  -3  12   7   17.50    1.74
   3  12  -7   15.00    1.47
   2 -12  -7   16.90    1.84
   2  12  -7   14.32    1.38
  -2  12   7   13.36    1.63
   1 -12  -7   -0.87    1.11
  -1  12   7   -0.84    1.18
   1  12  -7   -0.96    1.02
   0 -12  -7    6.40    1.35
   0  12  -7    6.33    1.04
   0  12  -7    6.28    1.15
  -1 -12  -7    7.43    1.49
  -1  12  -7    5.91    1.01
  -1  12  -7    5.88    1.13
  -2 -12  -7    1.70    1.29
  -2  12  -7   -0.25    0.88
  -2  12  -7    0.60    0.97
  -3 -12  -7    4.88    1.36
  -3  12  -7    6.11    1.12
  -3  12  -7    2.70    0.95
  -4 -12  -7    3.15    1.41
  -4  12  -7    1.99    1.08
  -4  12  -7    3.42    0.98
  -5 -12  -7    2.79    1.34
  -5  12  -7    3.77    1.04
  -6 -12  -7    2.65    1.35
  -6  12  -7    0.32    1.01
  -7 -12  -7    6.67    1.45
  -7  12  -7    3.40    1.15
  -8  13   7   12.65    1.83
  -7  13   7    2.88    1.50
  -6  13   7    2.03    1.56
  -5  13   7   20.38    2.25
  -4  13   7   -0.36    1.30
   3 -13  -7   24.62    2.11
  -3  13   7   20.78    2.24
   2 -13  -7    1.93    1.48
  -2  13   7    4.60    1.45
   1 -13  -7   10.80    1.60
  -1  13   7   14.17    1.62
   0 -13  -7    4.58    1.55
   0  13  -7    3.95    1.06
  -1 -13  -7   30.24    2.34
  -1  13  -7   26.10    1.84
  -2 -13  -7   17.51    1.93
  -2  13  -7   16.59    1.71
  -3 -13  -7    2.16    1.38
  -3  13  -7   -0.40    0.97
  -4 -13  -7    8.97    1.69
  -4  13  -7    6.14    1.20
  -5 -13  -7    4.05    1.58
  -5  13  -7    1.58    1.12
  -4  14   7   -1.57    1.42
  -3  14   7   -2.06    1.35
  -2  14   7    2.05    1.46
   0  14  -7    0.66    1.08
  -1  14  -7   11.44    1.44
  17   0  -8    4.18    1.39
  16   0  -8   50.14    2.80
 -16   0   8   50.86    2.76
 -15   0   8    8.02    1.30
  15   0  -8    6.26    1.37
  14   0  -8   91.33    3.79
 -14   0   8   91.76    3.65
 -13   0   8   31.23    1.88
  13   0  -8   32.96    2.13
  12   0  -8   60.01    2.68
 -12   0   8   55.83    2.48
 -11   0   8   42.49    1.99
  11   0  -8   42.92    2.20
  10   0  -8   14.33    1.41
 -10   0   8   14.59    1.17
   8   0  -8   10.61    0.99
   7   0  -8  143.26    4.88
   6   0  -8    6.53    0.73
   5   0  -8   56.53    2.11
   5   0  -8   54.91    2.14
   4   0  -8   56.33    2.08
   4   0  -8   57.80    2.13
   3   0  -8   28.17    1.23
   3   0  -8   27.27    1.22
   2   0  -8   76.39    2.64
   2   0  -8   77.37    2.64
   1   0  -8   16.72    0.84
   1   0  -8   16.48    0.83
   0   0  -8   23.33    1.02
   0   0  -8   23.49    0.99
  -1   0  -8   35.62    1.36
  -2   0  -8   69.82    2.41
  -3   0  -8    0.20    0.44
  -4   0  -8   95.39    3.27
  -5   0  -8   16.51    1.06
  -6   0  -8   36.24    1.61
  -7   0  -8   42.73    1.89
  -8   0  -8    3.11    0.81
  -9   0  -8   78.15    3.05
 -10   0  -8   -0.07    0.88
 -11   0  -8   12.56    1.39
 -12   0  -8    2.38    1.10
 -13   0  -8    8.44    1.37
 -14   0  -8    6.47    1.31
  17  -1  -8    3.79    1.30
  17   1  -8    2.71    1.35
 -17   1   8    1.04    1.40
  16  -1  -8   -2.24    1.22
 -16  -1   8    2.13    1.69
 -16   1   8   -0.85    1.29
  16   1  -8   -0.46    1.14
 -15  -1   8    1.26    1.13
  15  -1  -8    4.02    1.28
 -15   1   8   -0.51    1.28
  15   1  -8    1.91    1.20
  14  -1  -8    4.54    1.28
 -14  -1   8    7.64    1.12
 -14   1   8    5.93    1.20
  14   1  -8    5.54    1.26
  13  -1  -8   15.27    1.48
 -13  -1   8   18.61    1.64
  13   1  -8   16.32    1.70
 -13   1   8   12.14    1.30
  12  -1  -8    4.88    1.13
 -12  -1   8    4.01    0.89
 -12   1   8    5.03    0.97
  12   1  -8    5.48    1.10
 -11  -1   8   32.02    1.78
  11  -1  -8   37.37    2.02
 -11   1   8   33.21    1.89
  11   1  -8   34.79    1.96
  10  -1  -8   10.79    1.16
  10   1  -8   11.26    1.12
 -10   1   8   10.43    1.15
   9  -1  -8    1.27    0.81
   9   1  -8    0.42    0.76
  -9   1   8    0.63    0.67
   8  -1  -8   15.73    1.39
   8   1  -8   13.63    1.18
   7  -1  -8    2.67    0.72
   7   1  -8    1.94    0.72
   6  -1  -8   16.96    1.15
  -6   1   8   18.27    1.14
   6   1  -8   16.50    1.16
   6   1  -8   19.16    1.20
   5  -1  -8    0.65    0.54
   5   1  -8    1.35    0.49
   5   1  -8    0.34    0.53
   4  -1  -8   -0.71    0.47
   4  -1  -8    0.13    0.50
   4   1  -8   -0.08    0.46
   4   1  -8    0.07    0.46
   3  -1  -8    1.08    0.53
   3  -1  -8    1.01    0.49
   3   1  -8    1.78    0.44
   3   1  -8    1.29    0.43
   2  -1  -8   18.25    1.01
   2  -1  -8   18.62    1.00
   2   1  -8   18.68    0.87
   2   1  -8   17.68    0.87
   1  -1  -8   15.38    0.91
   1  -1  -8   15.52    0.90
   1   1  -8   15.61    0.76
   1   1  -8   16.90    0.77
   0  -1  -8    4.81    0.55
   0  -1  -8    5.52    0.56
   0   1  -8    4.40    0.49
   0   1  -8    5.74    0.51
  -1  -1  -8   18.85    0.95
  -1  -1  -8   17.68    0.98
  -1   1  -8   17.34    0.77
  -2  -1  -8   26.05    1.20
  -2   1  -8   27.35    1.07
  -3  -1  -8   -0.62    0.47
  -3   1  -8   -0.09    0.37
  -4  -1  -8    5.03    0.66
  -4   1  -8    6.52    0.71
  -5  -1  -8    1.54    0.60
  -5   1  -8    2.35    0.52
  -6  -1  -8    3.86    0.73
  -6   1  -8    4.10    0.64
  -7  -1  -8   -1.19    0.63
  -7   1  -8   -0.26    0.61
  -8  -1  -8    3.17    0.78
  -8   1  -8    2.04    0.66
  -9  -1  -8    0.11    0.88
  -9   1  -8    1.24    0.79
 -10  -1  -8    4.38    0.92
 -10   1  -8    3.78    0.94
 -11  -1  -8    8.81    1.13
 -11   1  -8    9.94    1.17
 -12  -1  -8    1.04    1.00
 -12   1  -8    1.03    1.03
 -13  -1  -8    1.44    1.09
 -13   1  -8    1.09    1.13
 -14  -1  -8   -1.56    1.23
 -14   1  -8    0.86    1.13
  17  -2  -8    5.26    1.41
  17   2  -8    5.05    1.42
 -17   2   8    2.01    1.45
  16  -2  -8    9.44    1.45
 -16   2   8    9.09    1.53
  16   2  -8    9.22    1.47
 -15  -2   8    7.14    1.13
  15  -2  -8    3.86    1.33
  15   2  -8    4.18    1.36
 -15   2   8    5.43    1.34
 -14  -2   8    3.69    1.02
  14  -2  -8    6.43    1.27
  14   2  -8    7.47    1.27
 -14   2   8    7.77    1.28
  13  -2  -8   17.80    1.80
 -13  -2   8   13.29    1.38
  13   2  -8   13.71    1.44
 -13   2   8   15.40    1.56
  12  -2  -8    9.97    1.30
 -12  -2   8   11.18    1.10
  12   2  -8   10.36    1.27
 -12   2   8   12.98    1.28
  11  -2  -8    6.09    1.11
 -11   2   8    5.97    1.02
 -10  -2   8    3.83    1.00
  10  -2  -8    4.58    1.00
 -10   2   8    3.29    0.88
   9  -2  -8   39.78    1.98
  -9   2   8   39.91    1.86
   8  -2  -8    7.83    0.97
  -8   2   8    8.89    0.90
   7  -2  -8   97.39    3.51
   7   2  -8   97.61    3.43
  -7   2   8   94.68    3.39
   6  -2  -8   19.86    1.26
   6   2  -8   20.89    1.23
   5  -2  -8   28.82    1.44
   5   2  -8   31.31    1.31
   4  -2  -8    2.41    0.60
   4   2  -8    3.78    0.51
  -4   2   8    3.32    1.05
   3  -2  -8   40.32    1.65
   3  -2  -8   40.66    1.67
   3   2  -8   39.74    1.50
   2  -2  -8   26.12    1.27
   2  -2  -8   24.34    1.21
   2   2  -8   25.34    1.01
   1  -2  -8   71.51    2.60
   1  -2  -8   72.95    2.59
   1   2  -8   74.01    2.38
   0  -2  -8   63.07    2.30
   0  -2  -8   61.43    2.26
   0   2  -8   63.83    2.03
  -1  -2  -8    0.67    0.54
  -1  -2  -8    0.81    0.53
  -1   2  -8    0.29    0.18
  -2  -2  -8   71.82    2.55
  -2  -2  -8   68.99    2.53
  -2   2  -8   69.15    2.28
  -3  -2  -8   -0.84    0.54
  -3   2  -8    0.06    0.30
  -4  -2  -8   18.60    1.11
  -4   2  -8   19.61    0.92
  -5  -2  -8   25.07    1.31
  -5   2  -8   23.94    1.13
  -6  -2  -8   58.72    2.36
  -6   2  -8   56.70    2.16
  -7  -2  -8   65.19    2.57
  -7   2  -8   59.43    2.37
  -8  -2  -8    4.74    0.98
  -8   2  -8    6.30    0.81
  -9  -2  -8   38.93    1.98
  -9   2  -8   38.89    1.89
 -10  -2  -8    1.50    1.04
 -10   2  -8   -0.09    0.84
 -11  -2  -8   13.90    1.38
 -11   2  -8   15.66    1.52
 -12  -2  -8    0.47    0.99
 -12   2  -8   -0.10    0.91
 -13  -2  -8    4.79    1.38
 -13   2  -8    9.11    1.35
 -14  -2  -8    3.45    1.37
 -14   2  -8    0.63    1.09
  17  -3  -8    1.44    1.43
  17   3  -8   -1.76    1.19
 -17   3   8    1.52    1.57
  16  -3  -8    1.16    1.38
 -16   3   8    0.92    1.47
  16   3  -8   -2.51    1.13
  15  -3  -8    0.16    1.13
  15   3  -8    0.69    1.14
 -15   3   8   -0.37    1.28
 -14  -3   8   -0.35    0.91
  14  -3  -8   -0.50    1.18
 -14   3   8    1.55    1.17
  13  -3  -8    2.62    1.19
 -13  -3   8    0.53    0.69
 -13   3   8    2.00    1.11
  12  -3  -8   13.87    1.44
 -12   3   8   16.31    1.57
  11  -3  -8   -0.87    0.96
 -11  -3   8    0.51    0.80
 -11   3   8   -0.08    0.92
  10  -3  -8    2.08    0.93
 -10   3   8    2.16    0.91
   9  -3  -8    2.15    0.92
  -9   3   8    0.60    0.81
   8  -3  -8   18.07    1.40
  -8   3   8   17.70    1.29
   7  -3  -8   13.39    1.24
   7   3  -8   15.39    1.22
  -7   3   8   14.06    1.24
   6  -3  -8    0.36    0.71
  -6   3   8    0.57    0.62
   6   3  -8    0.79    0.61
   5  -3  -8   12.55    1.10
   5   3  -8   12.27    0.90
   4  -3  -8   21.45    1.25
   4   3  -8   20.55    1.01
   3  -3  -8   12.58    1.00
   3   3  -8   12.94    0.76
   2  -3  -8    6.17    0.69
   2   3  -8    5.67    0.50
  -2   3   8    6.24    0.68
   1  -3  -8    5.46    0.68
   1   3  -8    6.35    0.36
   0  -3  -8    1.55    0.72
   0  -3  -8    1.87    0.62
  -1  -3  -8    6.60    0.75
  -1  -3  -8    5.80    0.71
  -2  -3  -8    1.30    0.62
  -2  -3  -8    1.18    0.64
  -3  -3  -8    3.29    0.71
  -3  -3  -8    4.05    0.78
  -3   3  -8    3.42    0.31
  -4  -3  -8    4.79    0.72
  -4   3  -8    4.64    0.44
  -5  -3  -8    6.34    0.82
  -5   3  -8    7.21    0.72
  -6  -3  -8   -0.61    0.69
  -6   3  -8    0.06    0.49
  -7  -3  -8    0.64    0.77
  -7   3  -8   -0.25    0.59
  -8  -3  -8    0.91    0.93
  -8   3  -8    0.83    0.68
  -9  -3  -8   -1.54    0.86
  -9   3  -8   -0.37    0.72
 -10  -3  -8   -0.49    1.00
 -10   3  -8    1.46    0.85
 -11  -3  -8    4.61    1.23
 -11   3  -8    4.44    0.92
 -12  -3  -8   -1.15    1.13
 -12   3  -8    0.63    1.03
 -13  -3  -8    2.07    1.32
 -13   3  -8    1.20    1.08
 -14  -3  -8   -0.90    1.26
 -14   3  -8    0.23    1.21
  17  -4  -8    4.45    1.66
 -17   4   8    7.11    1.75
  17   4  -8    7.31    1.46
  16  -4  -8   27.51    2.36
 -16   4   8   25.65    2.40
  15  -4  -8    1.22    1.25
 -15   4   8   -0.06    1.37
  14  -4  -8   11.14    1.47
 -14   4   8    8.67    1.44
  13  -4  -8    0.17    1.13
 -13   4   8    1.53    1.14
  12  -4  -8   43.27    2.42
 -12  -4   8   43.43    3.20
 -12   4   8   46.18    2.34
  11  -4  -8    2.54    1.09
 -11   4   8    0.61    1.00
  10  -4  -8   64.42    2.77
 -10   4   8   63.26    2.71
   9  -4  -8   14.55    1.49
  -9   4   8   16.44    1.41
   8  -4  -8    5.66    1.00
  -8   4   8    7.29    0.96
   8   4  -8    5.20    0.92
   7  -4  -8   28.22    1.68
  -7   4   8   30.95    1.62
   7   4  -8   30.06    1.58
   6  -4  -8    1.74    0.78
  -6   4   8    3.66    0.75
   6   4  -8    2.77    0.60
   5  -4  -8  109.08    3.89
  -5   4   8  111.10    3.83
   5   4  -8  107.35    3.70
   4  -4  -8   21.67    1.33
  -4   4   8   20.14    1.30
   4   4  -8   22.33    1.06
   3  -4  -8   74.27    2.67
  -3   4   8   59.64    2.51
   3   4  -8   76.34    2.41
   2  -4  -8    0.09    0.61
   2   4  -8    0.30    0.31
  -2   4   8   -0.25    0.46
   1  -4  -8   11.10    1.04
   1   4  -8   12.47    0.49
   0  -4  -8   89.66    3.22
  -1  -4  -8   -0.64    0.57
  -2  -4  -8   39.24    1.76
  -3  -4  -8   43.30    1.88
  -3   4  -8   44.61    1.43
  -3   4  -8   40.09    1.43
  -4  -4  -8   17.01    1.37
  -4   4  -8   16.15    0.80
  -4   4  -8   17.42    0.82
  -5  -4  -8   15.29    1.24
  -5   4  -8   13.42    0.84
  -6  -4  -8   13.96    1.28
  -6   4  -8   11.10    0.89
  -7  -4  -8   80.18    3.16
  -7   4  -8   81.21    2.91
  -8  -4  -8    1.03    0.92
  -8   4  -8    0.35    0.67
  -9  -4  -8   11.01    1.25
  -9   4  -8   10.54    1.18
 -10  -4  -8   10.85    1.37
 -10   4  -8   13.16    1.32
 -11  -4  -8   11.10    1.36
 -11   4  -8   11.25    1.17
 -12  -4  -8    3.72    1.17
 -12   4  -8    1.77    1.03
 -13  -4  -8    8.76    1.54
 -13   4  -8    6.33    1.32
 -14  -4  -8   12.21    1.62
  16  -5  -8   -0.09    1.43
 -16   5   8    7.01    1.63
  15  -5  -8    6.64    1.55
 -15   5   8    5.08    1.54
  14  -5  -8   19.76    2.05
 -14   5   8   21.27    2.09
  13  -5  -8    1.30    1.22
 -13   5   8   -0.87    1.19
  12  -5  -8    7.19    1.26
 -12   5   8    6.45    1.31
  11  -5  -8    1.67    1.09
 -11   5   8    1.85    1.11
  10  -5  -8    9.53    1.08
 -10   5   8    8.26    1.20
   9  -5  -8   11.15    1.23
  -9   5   8   11.04    1.17
   8  -5  -8   -0.44    0.86
   8   5  -8    2.09    0.92
  -8   5   8    0.40    0.84
   7  -5  -8    2.44    0.87
   7   5  -8    1.88    0.78
  -7   5   8    1.40    0.82
   6  -5  -8   -0.26    0.80
   6   5  -8   -0.24    0.61
  -6   5   8    0.85    0.73
   5  -5  -8   22.74    1.46
  -5   5   8   21.90    1.39
   5   5  -8   23.10    1.20
   4  -5  -8    0.95    0.71
  -4   5   8    0.45    0.69
   4   5  -8    1.26    0.48
   3  -5  -8    7.12    0.90
  -3   5   8    8.51    0.91
   3   5  -8    6.72    0.70
   2  -5  -8    0.68    0.71
   2   5  -8    0.93    0.37
  -2   5   8    0.00    0.62
   1  -5  -8   22.46    1.38
  -1   5   8   21.23    1.31
   1   5  -8   22.48    0.84
   1   5  -8   21.42    0.83
   0  -5  -8    0.13    0.70
  -1  -5  -8   32.45    1.65
  -2  -5  -8   25.85    1.50
  -3  -5  -8    7.28    0.92
  -3   5  -8    6.44    0.46
  -3   5  -8    7.13    0.47
  -4  -5  -8    0.45    0.78
  -4   5  -8   -0.11    0.32
  -4   5  -8    0.04    0.35
  -5  -5  -8   40.47    2.02
  -5   5  -8   41.13    1.61
  -5   5  -8   43.71    1.61
  -6  -5  -8   -0.60    0.80
  -6   5  -8   -0.34    0.51
  -7  -5  -8    1.67    0.93
  -7   5  -8    1.24    0.62
  -8  -5  -8    7.60    1.26
  -8   5  -8    8.66    0.86
  -9  -5  -8    0.52    1.01
  -9   5  -8    0.03    0.75
 -10  -5  -8    0.79    1.08
 -10   5  -8   -0.04    0.82
 -11  -5  -8   -0.47    1.12
 -11   5  -8   -0.25    0.93
 -12  -5  -8   -0.33    1.18
 -12   5  -8    0.21    1.04
 -13  -5  -8    2.32    1.33
 -13   5  -8    2.55    1.21
 -16   6   8    4.60    1.53
  15  -6  -8   -0.48    1.34
 -15   6   8    2.12    1.39
  14  -6  -8   27.71    2.36
 -14   6   8   31.02    2.37
  13  -6  -8   -1.24    1.19
 -13   6   8   -0.32    1.24
  12  -6  -8   47.65    2.56
 -12   6   8   46.10    2.56
  11  -6  -8   53.40    2.67
 -11   6   8   53.23    2.65
  10  -6  -8   12.74    1.37
 -10   6   8   11.25    1.31
   9  -6  -8   74.16    3.12
  -9   6   8   74.15    3.10
   8  -6  -8   11.24    1.25
  -8   6   8   13.87    1.48
   8   6  -8   12.30    1.31
   7  -6  -8  140.26    4.93
  -7   6   8  137.96    4.90
   7   6  -8  136.08    4.77
   6  -6  -8   21.15    1.56
  -6   6   8   20.70    1.48
   6   6  -8   19.93    1.31
   5  -6  -8  157.21    5.44
   5   6  -8  157.08    5.24
  -5   6   8  156.22    5.40
   4  -6  -8   33.35    1.80
  -4   6   8   32.06    1.71
   4   6  -8   33.60    1.45
   3  -6  -8   50.01    2.21
  -3   6   8   49.71    2.16
   3   6  -8   50.30    1.86
   2  -6  -8   92.18    3.47
  -2   6   8   96.71    3.42
   2   6  -8   91.31    3.12
   1  -6  -8   60.72    2.41
   1   6  -8   56.46    1.96
  -1   6   8   56.80    2.32
   1   6  -8   54.72    1.94
   0  -6  -8   48.06    2.13
   0   6  -8   46.36    1.63
   0   6  -8   49.13    1.64
  -1  -6  -8    5.43    0.88
  -1   6  -8    5.62    0.43
  -1   6  -8    5.46    0.43
  -2  -6  -8   92.04    3.39
  -2   6  -8   89.22    2.91
  -2   6  -8   88.06    2.91
  -3  -6  -8    1.80    0.86
  -3   6  -8    0.24    0.33
  -3   6  -8    0.54    0.31
  -4  -6  -8   79.62    3.19
  -4   6  -8   82.14    2.76
  -4   6  -8   82.62    2.75
  -5  -6  -8   17.17    1.55
  -5   6  -8   20.87    1.05
  -5   6  -8   20.41    1.05
  -6  -6  -8    7.62    1.09
  -6   6  -8    5.71    0.67
  -6   6  -8    5.68    0.70
  -7  -6  -8    1.44    0.99
  -7   6  -8    2.46    0.67
  -8  -6  -8    2.24    1.06
  -8   6  -8    1.16    0.69
  -9  -6  -8   28.92    2.02
  -9   6  -8   29.30    1.68
 -10  -6  -8    0.39    1.13
 -10   6  -8    1.46    0.88
 -11  -6  -8    3.63    1.27
 -11   6  -8    4.32    1.07
 -12  -6  -8    7.40    1.56
 -12   6  -8    6.91    1.25
 -13  -6  -8   20.49    2.10
 -13   6  -8   17.99    1.97
  15  -7  -8    1.03    1.36
 -15   7   8   -1.14    1.41
  14  -7  -8    1.34    1.39
 -14   7   8   -0.05    1.32
  13  -7  -8    1.69    1.42
 -13   7   8    0.54    1.30
  12  -7  -8    0.67    1.20
 -12   7   8   -0.73    1.24
  11  -7  -8    1.08    1.13
 -11   7   8   -0.77    1.20
  10  -7  -8   -1.61    1.08
 -10   7   8    0.49    1.15
   9  -7  -8    3.35    1.15
  -9   7   8    2.49    1.14
   8  -7  -8    1.90    1.06
   8   7  -8    0.23    0.99
  -8   7   8   -1.47    0.98
   7  -7  -8    0.09    0.95
  -7   7   8    1.26    1.00
   7   7  -8    2.68    0.88
   6  -7  -8    2.88    0.98
   6   7  -8    2.15    0.77
  -6   7   8    2.07    0.96
   5  -7  -8    2.60    0.95
   5   7  -8    0.85    0.65
  -5   7   8    1.74    0.89
   4  -7  -8    0.73    0.87
  -4   7   8    0.80    0.85
   4   7  -8    0.65    0.58
   3  -7  -8    2.52    0.94
   3   7  -8    3.66    0.61
  -3   7   8    3.60    0.85
   2  -7  -8    0.83    0.89
   2   7  -8    0.94    0.50
  -2   7   8    1.41    0.84
   1  -7  -8   27.55    1.66
   1   7  -8   25.92    1.15
   1   7  -8   24.99    1.13
  -1   7   8   25.67    1.58
   0  -7  -8   -0.13    0.81
   0   7  -8    0.01    0.38
   0   7  -8    0.24    0.39
  -1  -7  -8    1.56    0.91
  -1   7  -8    1.54    0.41
  -1   7  -8    1.47    0.38
  -2  -7  -8    5.48    0.97
  -2   7  -8    3.88    0.47
  -2   7  -8    5.56    0.62
  -3  -7  -8    0.95    0.92
  -3   7  -8    0.04    0.40
  -3   7  -8    0.96    0.43
  -4  -7  -8    6.45    1.06
  -4   7  -8    5.24    0.56
  -4   7  -8    4.78    0.57
  -5  -7  -8   -0.25    0.92
  -5   7  -8    0.58    0.54
  -5   7  -8    0.78    0.54
  -6  -7  -8    2.36    1.07
  -6   7  -8    0.07    0.63
  -6   7  -8    1.95    0.61
  -7  -7  -8   -1.60    0.97
  -7   7  -8    0.21    0.64
  -7   7  -8    0.07    0.71
  -8  -7  -8    4.32    1.17
  -8   7  -8    0.53    0.71
  -9  -7  -8    4.93    1.34
  -9   7  -8    2.43    0.85
 -10  -7  -8    1.05    1.33
 -10   7  -8   -0.02    0.86
 -11  -7  -8    1.07    1.23
 -11   7  -8    0.78    0.98
 -12  -7  -8    0.59    1.33
 -12   7  -8    2.57    1.14
 -14   8   8   47.08    2.83
  13  -8  -8    2.44    1.42
 -13   8   8    3.48    1.37
  12  -8  -8   35.94    2.66
 -12   8   8   39.05    2.45
  11  -8  -8   19.00    1.91
 -11   8   8   13.65    1.65
  10  -8  -8   33.80    2.16
 -10   8   8   29.27    2.23
   9  -8  -8   42.29    2.32
  -9   8   8   39.53    2.39
   8  -8  -8   12.29    1.38
  -8   8   8   12.06    1.40
   8   8  -8   11.18    1.25
   7  -8  -8   43.68    2.35
   7   8  -8   44.26    2.20
  -7   8   8   45.96    2.37
   6  -8  -8   -0.92    0.98
   6   8  -8    0.92    0.83
  -6   8   8    0.35    1.00
   5  -8  -8    3.09    1.05
   5   8  -8    4.24    0.84
  -5   8   8    3.00    1.03
   4  -8  -8   25.57    1.78
   4   8  -8   25.64    1.41
  -4   8   8   25.18    1.75
   3  -8  -8   -0.41    0.92
   3   8  -8   -0.44    0.60
  -3   8   8   -0.37    0.89
   2  -8  -8   13.93    1.48
  -2   8   8   13.01    1.42
   2   8  -8   12.84    0.99
   1  -8  -8    3.55    1.00
   1   8  -8    3.52    0.58
   1   8  -8    3.35    0.59
  -1   8   8    3.50    0.98
   0  -8  -8   12.88    1.28
   0   8  -8   16.01    0.98
   0   8  -8   14.15    0.94
  -1  -8  -8   12.46    1.24
  -1   8  -8   11.49    0.87
  -1   8  -8   14.44    0.91
  -2  -8  -8   73.11    3.06
  -2   8  -8   73.42    2.58
  -2   8  -8   74.20    2.59
  -3  -8  -8   26.03    1.81
  -3   8  -8   24.05    1.21
  -3   8  -8   24.55    1.20
  -4  -8  -8   46.16    2.35
  -4   8  -8   45.16    1.83
  -4   8  -8   46.53    1.83
  -5  -8  -8    5.90    1.16
  -5   8  -8    6.43    0.72
  -5   8  -8    6.02    0.71
  -6  -8  -8   22.46    1.82
  -6   8  -8   21.41    1.28
  -6   8  -8   21.97    1.34
  -7  -8  -8   19.44    1.85
  -7   8  -8   20.58    1.33
  -7   8  -8   22.23    1.46
  -8  -8  -8   11.93    1.50
  -8   8  -8   14.66    1.46
  -8   8  -8   14.06    1.30
  -9  -8  -8    5.90    1.35
  -9   8  -8    7.09    0.98
 -10  -8  -8   -0.09    1.36
 -10   8  -8    0.21    0.91
 -11  -8  -8    4.52    1.41
 -11   8  -8    4.42    1.11
 -13   9   8    5.83    1.51
  12  -9  -8   -2.10    1.35
 -12   9   8    3.75    1.34
  11  -9  -8    5.73    1.52
 -11   9   8    3.76    1.32
  10  -9  -8   -0.53    1.20
 -10   9   8   -0.45    1.16
   9  -9  -8   10.85    1.44
  -9   9   8   12.33    1.56
   8  -9  -8   10.17    1.42
   8   9  -8   12.84    1.42
  -8   9   8   10.19    1.45
   7  -9  -8    0.85    1.08
  -7   9   8   -0.60    1.15
   7   9  -8    0.56    1.02
   6  -9  -8    2.71    1.07
  -6   9   8    2.08    1.12
   6   9  -8    1.51    0.94
   5  -9  -8    0.84    1.06
  -5   9   8   -0.12    1.03
   5   9  -8   -0.85    0.81
   4  -9  -8    0.20    0.98
  -4   9   8   -1.24    0.99
   4   9  -8    0.97    0.74
   3  -9  -8   -1.61    0.96
   3   9  -8   -0.48    0.70
  -3   9   8    0.45    1.03
   2  -9  -8    8.95    1.23
  -2   9   8    9.90    1.22
   2   9  -8    8.84    0.86
   1  -9  -8    0.84    1.02
  -1   9   8    0.24    0.97
   1   9  -8    0.38    0.59
   1   9  -8    0.10    0.61
   0  -9  -8    3.76    1.09
   0   9  -8    2.72    0.64
   0   9  -8    1.56    0.62
  -1  -9  -8    3.17    1.08
  -1   9  -8    2.97    0.62
  -1   9  -8    3.63    0.64
  -2  -9  -8    4.02    1.15
  -2   9  -8    3.23    0.63
  -2   9  -8    3.95    0.68
  -3  -9  -8    2.30    1.14
  -3   9  -8    3.75    0.69
  -3   9  -8    2.93    0.67
  -4  -9  -8    0.34    1.12
  -4   9  -8    2.87    0.70
  -4   9  -8    0.87    0.66
  -5  -9  -8    0.69    1.13
  -5   9  -8   -0.47    0.65
  -5   9  -8    0.54    0.70
  -6  -9  -8    0.08    1.14
  -6   9  -8    0.51    0.69
  -6   9  -8   -0.08    0.75
  -7  -9  -8   -0.38    1.15
  -7   9  -8    0.52    0.84
  -7   9  -8    0.12    0.74
  -8  -9  -8   -1.28    1.23
  -8   9  -8    0.95    0.84
  -8   9  -8    0.62    0.94
  -9  -9  -8   -0.57    1.26
  -9   9  -8   -0.94    1.19
  -9   9  -8   -0.06    0.88
 -10  -9  -8   -0.99    1.26
 -10   9  -8   -0.41    0.94
 -12  10   8   21.99    2.31
  11 -10  -8   -0.86    1.36
 -11  10   8    0.06    1.37
  10 -10  -8    3.00    1.34
 -10  10   8    3.24    1.33
   9 -10  -8    7.84    1.53
  -9  10   8   10.39    1.51
   8 -10  -8    3.08    1.32
  -8  10   8    2.40    1.25
   7 -10  -8    4.34    1.21
  -7  10   8    4.27    1.35
   7  10  -8    6.40    1.14
   6 -10  -8   -1.13    1.06
  -6  10   8   -2.45    1.13
   6  10  -8    1.74    1.03
   5 -10  -8   21.68    1.90
  -5  10   8   24.55    2.00
   5  10  -8   23.61    1.68
   4 -10  -8    0.76    1.07
  -4  10   8    3.67    1.21
   4  10  -8    0.98    0.89
   3 -10  -8    0.92    1.10
  -3  10   8    1.86    1.14
   3  10  -8    1.23    0.82
   2 -10  -8    3.84    1.19
  -2  10   8    4.89    1.23
   2  10  -8    2.53    0.81
   1 -10  -8    6.32    1.22
   1  10  -8    5.50    0.84
  -1  10   8    7.03    1.24
   1  10  -8    5.57    0.81
   0 -10  -8   54.65    2.65
   0  10  -8   51.88    2.15
   0  10  -8   53.62    2.19
  -1 -10  -8   -0.54    1.10
  -1  10  -8    0.63    0.70
  -1  10  -8    0.31    0.66
  -2 -10  -8   37.54    2.27
  -2  10  -8   35.84    1.73
  -2  10  -8   34.78    1.70
  -3 -10  -8   -0.37    1.12
  -3  10  -8    0.35    0.68
  -3  10  -8    0.48    0.73
  -4 -10  -8   26.22    2.07
  -4  10  -8   26.13    1.48
  -4  10  -8   25.24    1.53
  -5 -10  -8   21.72    1.97
  -5  10  -8   19.23    1.49
  -5  10  -8   18.90    1.36
  -6 -10  -8    4.60    1.23
  -6  10  -8    0.90    0.88
  -6  10  -8    2.37    0.81
  -7 -10  -8   28.92    2.38
  -7  10  -8   25.48    1.67
  -7  10  -8   27.49    1.82
  -8 -10  -8    0.06    1.24
  -8  10  -8    1.56    1.12
  -8  10  -8    1.14    0.93
  -9 -10  -8    8.72    1.55
  -9  10  -8    7.88    1.16
 -11  11   8    6.94    1.58
 -10  11   8    7.90    1.69
   9 -11  -8   -0.38    1.36
  -9  11   8   -1.40    1.33
   8 -11  -8    2.00    1.30
  -8  11   8    4.75    1.33
   7 -11  -8    1.30    1.26
  -7  11   8    1.18    1.30
   6 -11  -8    6.31    1.33
  -6  11   8    4.18    1.35
   5 -11  -8   -0.79    1.11
  -5  11   8    0.46    1.25
   5  11  -8   -0.11    1.05
   4 -11  -8    0.27    1.11
   4  11  -8    0.04    0.97
  -4  11   8    0.26    1.19
   3 -11  -8   -0.85    1.12
   3  11  -8    1.19    0.93
  -3  11   8    0.64    1.31
   2 -11  -8    5.78    1.24
  -2  11   8    5.01    1.29
   2  11  -8    6.26    0.99
   1 -11  -8    0.54    1.14
  -1  11   8   -1.27    1.09
   1  11  -8    0.85    0.87
   0 -11  -8    1.40    1.18
   0  11  -8   -0.05    0.81
   0  11  -8    1.15    0.72
  -1 -11  -8    1.37    1.14
  -1  11  -8   -0.76    0.81
  -1  11  -8    0.76    0.74
  -2 -11  -8    1.32    1.12
  -2  11  -8    1.26    0.77
  -2  11  -8    0.20    0.85
  -3 -11  -8    4.57    1.22
  -3  11  -8    3.62    0.84
  -3  11  -8    4.24    0.93
  -4 -11  -8    0.62    1.17
  -4  11  -8    1.19    0.79
  -4  11  -8   -0.17    0.88
  -5 -11  -8    8.38    1.34
  -5  11  -8    6.22    0.99
  -5  11  -8    7.09    1.07
  -6 -11  -8    8.82    1.45
  -6  11  -8    7.38    1.17
  -6  11  -8    7.50    1.06
  -7 -11  -8    0.75    1.27
  -7  11  -8   -0.11    0.93
  -8 -11  -8    2.37    1.41
  -8  11  -8    0.60    1.04
  -9  12   8    4.16    1.55
  -8  12   8    4.19    1.45
   7 -12  -8   10.85    1.57
  -7  12   8    8.04    1.57
   6 -12  -8    0.27    1.31
  -6  12   8    2.00    1.34
   5 -12  -8   11.30    1.52
  -5  12   8   10.33    1.52
   4 -12  -8    3.48    1.44
  -4  12   8   -1.11    1.17
   3 -12  -8    4.70    1.38
   3  12  -8    4.11    1.23
  -3  12   8    4.66    1.38
   2 -12  -8    6.43    1.41
   2  12  -8    6.46    1.19
  -2  12   8    4.86    1.42
   1 -12  -8    1.43    1.32
  -1  12   8    3.48    1.32
   1  12  -8    1.05    0.99
   0 -12  -8   22.64    2.08
   0  12  -8   22.73    1.62
   0  12  -8   24.69    1.85
  -1 -12  -8    4.82    1.34
  -1  12  -8    2.42    0.89
  -1  12  -8    3.68    1.08
  -2 -12  -8   34.71    2.34
  -2  12  -8   33.70    1.89
  -2  12  -8   35.37    2.04
  -3 -12  -8    3.72    1.29
  -3  12  -8    0.10    0.87
  -3  12  -8    1.98    1.00
  -4 -12  -8   10.39    1.57
  -4  12  -8    9.78    1.15
  -4  12  -8   12.02    1.27
  -5 -12  -8    1.33    1.24
  -5  12  -8    1.15    0.95
  -6 -12  -8    1.66    1.31
  -6  12  -8    1.12    1.01
  -7  13   8    3.09    1.54
  -6  13   8    5.51    1.65
  -5  13   8    1.03    1.44
   4 -13  -8    5.64    2.23
  -4  13   8    4.17    1.47
   3 -13  -8    5.64    1.50
  -3  13   8    6.23    1.51
   2 -13  -8   14.44    1.76
  -2  13   8   17.18    1.80
   1 -13  -8   -1.11    1.55
   0 -13  -8    1.05    1.38
   0  13  -8    5.47    1.04
  -1 -13  -8    1.26    1.38
  -1  13  -8   -0.86    0.93
  -2 -13  -8    0.01    1.41
  -2  13  -8    0.74    0.98
  -3 -13  -8   -0.28    1.35
  -3  13  -8    1.02    1.02
  -4 -13  -8    4.06    1.47
  -4  13  -8    1.83    1.07
  17   0  -9    0.63    1.32
  16   0  -9   -0.45    1.24
 -15   0   9   -0.18    1.18
  15   0  -9   -0.94    1.18
 -14   0   9    1.67    0.93
  14   0  -9   -0.06    1.14
  13   0  -9    1.04    1.09
 -13   0   9   -1.02    0.84
 -12   0   9    0.42    0.83
  12   0  -9    1.64    1.03
  11   0  -9    0.06    0.95
 -11   0   9    0.30    0.62
  10   0  -9   -0.11    0.87
   9   0  -9   -0.89    0.78
  -9   0   9   -0.39    0.69
   8   0  -9   -0.06    0.73
   7   0  -9    0.18    0.64
   6   0  -9    0.52    0.64
   6   0  -9   -0.47    0.55
   5   0  -9   -0.64    0.51
   5   0  -9    0.40    0.63
   4   0  -9    0.10    0.52
   4   0  -9   -0.08    0.47
   3   0  -9   -0.48    0.47
   3   0  -9    0.14    0.45
   2   0  -9   -0.13    0.45
   2   0  -9   -0.32    0.43
   1   0  -9   -0.11    0.41
   1   0  -9    0.24    0.43
   0   0  -9    0.48    0.41
   0   0  -9   -0.05    0.41
  -1   0  -9    0.03    0.41
  -1   0  -9   -0.19    0.41
  -2   0  -9   -0.23    0.42
  -3   0  -9    0.36    0.45
  -4   0  -9   -0.16    0.50
  -5   0  -9   -0.55    0.54
  -6   0  -9    0.26    0.59
  -7   0  -9   -1.05    0.65
  -8   0  -9   -0.18    0.72
  -9   0  -9    0.06    0.84
 -10   0  -9    0.04    0.78
 -11   0  -9    1.35    0.91
 -12   0  -9    0.78    1.00
 -13   0  -9    0.11    1.06
 -14   0  -9   -0.11    1.32
  17  -1  -9    5.95    1.50
  17   1  -9    3.72    1.41
  16  -1  -9   39.35    2.49
  16   1  -9   35.09    2.52
  15  -1  -9    4.63    1.31
  15   1  -9    4.87    1.32
 -15   1   9    5.84    1.41
 -14  -1   9    1.98    1.09
  14  -1  -9    1.77    1.18
  14   1  -9    4.31    1.24
 -14   1   9    3.50    1.12
 -13  -1   9   24.64    1.59
  13  -1  -9   23.77    1.94
 -13   1   9   22.58    1.89
  13   1  -9   24.72    1.90
  12  -1  -9   -0.27    1.02
 -12  -1   9   -0.38    0.69
 -12   1   9    2.21    0.88
  12   1  -9    0.17    0.96
  11  -1  -9    9.17    1.21
 -11   1   9    7.62    0.99
  11   1  -9    8.34    1.14
  10  -1  -9    1.59    0.95
 -10  -1   9    0.33    0.92
  10   1  -9    1.66    0.89
 -10   1   9    1.42    0.81
   9  -1  -9   11.10    1.12
   9   1  -9   12.29    1.25
   8  -1  -9   15.69    1.29
   8   1  -9   13.39    1.20
   7  -1  -9   70.73    2.73
   7   1  -9   72.33    2.68
   7   1  -9   69.78    2.71
   6  -1  -9   64.64    2.43
   6   1  -9   62.22    2.41
   6   1  -9   61.23    2.36
   5  -1  -9   12.66    1.10
   5  -1  -9   16.60    1.11
   5   1  -9   14.00    1.04
   5   1  -9   15.90    0.96
   4  -1  -9   74.37    2.60
   4  -1  -9   72.91    2.56
   4   1  -9   71.83    2.49
   4   1  -9   62.29    2.48
   3  -1  -9    4.25    0.58
   3  -1  -9    5.34    0.66
   3   1  -9    4.21    0.53
   3   1  -9    4.18    0.53
   2  -1  -9   67.44    2.50
   2  -1  -9   68.83    2.50
   2   1  -9   70.24    2.40
   2   1  -9   72.30    2.41
   1  -1  -9   18.53    1.01
   1  -1  -9   17.16    1.00
   1   1  -9   19.06    0.88
   1   1  -9   17.32    0.87
   0  -1  -9   69.96    2.44
   0  -1  -9   68.81    2.44
   0   1  -9   67.49    2.32
   0   1  -9   68.44    2.32
  -1  -1  -9   19.59    1.07
  -1  -1  -9   21.77    1.08
  -1   1  -9   21.10    0.91
  -2  -1  -9   14.32    0.92
  -2  -1  -9   13.89    0.92
  -2   1  -9   12.36    0.76
  -3  -1  -9    8.00    0.83
  -3   1  -9    7.56    0.71
  -4  -1  -9   35.51    1.59
  -4   1  -9   36.47    1.47
  -5  -1  -9   37.95    1.70
  -5   1  -9   39.06    1.61
  -6  -1  -9    1.02    0.66
  -6   1  -9   -0.04    0.57
  -7  -1  -9   40.62    1.83
  -7   1  -9   39.58    1.82
  -8  -1  -9   12.73    1.23
  -8   1  -9   11.89    1.25
  -9  -1  -9   48.72    2.29
  -9   1  -9   47.85    2.17
 -10  -1  -9   18.86    1.50
 -10   1  -9   18.49    1.41
 -11  -1  -9    6.61    1.18
 -11   1  -9    4.49    0.99
 -12  -1  -9    5.14    1.28
 -12   1  -9    7.11    1.13
 -13  -1  -9    1.36    1.25
 -13   1  -9    0.32    1.10
 -14  -1  -9    0.98    1.24
 -14   1  -9   -1.36    1.32
  17  -2  -9    0.04    1.39
  17   2  -9    0.58    1.29
  16  -2  -9    2.25    1.26
 -16   2   9    3.21    2.16
  16   2  -9    0.19    1.27
  15  -2  -9    3.32    1.32
  15   2  -9    0.15    1.17
 -15   2   9    3.39    1.26
  14  -2  -9    3.37    1.25
 -14  -2   9    3.61    1.09
  14   2  -9    3.08    1.13
 -14   2   9    1.43    1.13
  13  -2  -9    1.69    1.17
 -13   2   9   -0.18    0.98
  13   2  -9   -0.42    1.02
  12  -2  -9    4.65    1.16
 -12   2   9    3.29    1.05
  12   2  -9   -0.05    1.00
  11  -2  -9   19.82    1.70
 -11   2   9   16.41    1.43
  11   2  -9   17.98    1.58
  10  -2  -9    2.93    1.00
 -10   2   9    2.42    0.83
   9  -2  -9   -0.71    0.92
  -9   2   9   -1.30    0.74
   8  -2  -9    0.06    0.79
  -8   2   9    0.28    0.51
   7  -2  -9    2.23    0.79
   7   2  -9    3.15    0.80
   6  -2  -9    1.28    0.68
  -6   2   9    0.53    0.70
   6   2  -9    2.10    0.67
   5  -2  -9    3.54    0.69
   5   2  -9    4.53    0.62
   4  -2  -9    0.04    0.55
   4   2  -9   -0.28    0.47
   3  -2  -9   11.06    1.10
   3  -2  -9   11.63    1.04
   3   2  -9   11.79    0.76
   2  -2  -9    9.56    0.89
   2  -2  -9    8.36    0.94
   2   2  -9    8.50    0.65
   1  -2  -9   -0.05    0.58
   1  -2  -9   -0.27    0.47
   1   2  -9    0.23    0.30
   1   2  -9    0.08    0.30
   0  -2  -9    1.24    0.52
   0  -2  -9    1.54    0.57
   0   2  -9    1.22    0.27
   0   2  -9    0.93    0.28
  -1  -2  -9   10.79    0.94
  -1  -2  -9   10.97    0.95
  -1   2  -9    8.81    0.51
  -2  -2  -9    1.33    0.52
  -2  -2  -9    1.15    0.56
  -2   2  -9    1.59    0.31
  -3  -2  -9   -0.47    0.59
  -3  -2  -9   -0.10    0.61
  -3   2  -9    0.27    0.34
  -4  -2  -9   17.00    1.22
  -4   2  -9   17.27    0.90
  -5  -2  -9    3.51    0.77
  -5   2  -9    4.04    0.56
  -6  -2  -9   22.79    1.39
  -6   2  -9   25.20    1.26
  -7  -2  -9    0.65    0.72
  -7   2  -9   -0.21    0.62
  -8  -2  -9    2.24    0.86
  -8   2  -9    3.09    0.71
  -9  -2  -9    0.61    0.92
  -9   2  -9    0.28    0.77
 -10  -2  -9    0.68    0.88
 -10   2  -9    0.40    0.88
 -11  -2  -9    9.77    1.24
 -11   2  -9   12.00    1.24
 -12  -2  -9    2.00    1.10
 -12   2  -9    2.16    1.05
 -13  -2  -9    0.98    1.17
 -13   2  -9   -0.60    0.96
  17  -3  -9   -0.23    1.37
  17   3  -9    1.45    1.35
  16  -3  -9   14.26    1.67
  16   3  -9   10.24    1.58
 -16   3   9   13.86    1.76
  15  -3  -9   19.66    2.04
  15   3  -9   18.57    2.02
 -15   3   9   24.52    2.16
  14  -3  -9   20.78    2.21
  14   3  -9   17.29    1.86
 -14   3   9   20.96    2.15
  13  -3  -9   10.84    1.39
 -13  -3   9    9.26    1.14
 -13   3   9    9.55    1.31
  12  -3  -9    6.95    1.20
 -12   3   9    6.03    1.12
  11  -3  -9    1.81    1.04
 -11   3   9    3.16    0.98
  10  -3  -9   28.84    1.87
 -10   3   9   29.08    1.71
   9  -3  -9   91.48    3.45
  -9   3   9   85.75    3.32
   8  -3  -9    2.99    0.87
   8   3  -9    3.58    0.85
  -8   3   9    3.05    0.79
   7  -3  -9   53.54    2.33
   7   3  -9   50.25    2.07
  -7   3   9   49.02    2.09
   6  -3  -9   55.29    2.48
   6   3  -9   68.90    2.40
   5  -3  -9    4.35    0.84
   5   3  -9    3.28    0.62
   4  -3  -9  195.77    6.47
  -4   3   9  194.50    6.40
   4   3  -9  193.17    6.30
   3  -3  -9    5.67    0.73
   3   3  -9    4.86    0.51
   2  -3  -9  143.28    4.94
   2   3  -9  149.82    4.72
   1  -3  -9    1.02    0.68
   1  -3  -9    0.51    0.55
   1   3  -9    1.04    0.27
   0  -3  -9   75.30    2.73
   0  -3  -9   73.94    2.74
  -1  -3  -9   70.53    2.63
  -1  -3  -9   67.12    2.59
  -2  -3  -9   12.50    1.09
  -2  -3  -9   10.98    0.99
  -2   3  -9   10.71    0.47
  -3  -3  -9   25.47    1.36
  -3  -3  -9   25.07    1.54
  -3   3  -9   24.44    0.96
  -4  -3  -9   13.43    1.26
  -4  -3  -9   13.66    1.24
  -4   3  -9   12.77    0.75
  -5  -3  -9   28.24    1.52
  -5   3  -9   27.67    1.23
  -6  -3  -9    5.29    0.86
  -6   3  -9    6.32    0.67
  -7  -3  -9   79.18    3.08
  -7   3  -9   78.80    2.86
  -8  -3  -9   29.94    1.77
  -8   3  -9   29.31    1.52
  -9  -3  -9    2.87    1.10
  -9   3  -9    3.05    0.82
 -10  -3  -9   24.21    1.73
 -10   3  -9   21.48    1.56
 -11  -3  -9   -1.09    0.96
 -11   3  -9    1.85    0.96
 -12  -3  -9   11.47    1.42
 -12   3  -9   12.27    1.34
 -13  -3  -9   -0.36    1.17
 -13   3  -9   -0.16    1.15
  16  -4  -9    2.29    1.41
  16   4  -9    4.82    1.36
 -16   4   9    3.31    1.65
  15  -4  -9   -0.97    1.17
 -15   4   9    4.06    1.57
  14  -4  -9    6.91    1.43
 -14   4   9    5.13    1.39
  13  -4  -9    9.27    1.43
 -13   4   9   10.18    1.38
  12  -4  -9   -0.98    1.09
 -12   4   9   -1.02    1.14
  11  -4  -9    2.16    1.11
 -11   4   9    2.16    1.10
  10  -4  -9    0.08    1.01
 -10   4   9   -0.06    0.89
   9  -4  -9   26.79    1.80
  -9   4   9   24.47    1.62
   8  -4  -9   17.07    1.51
   8   4  -9   15.83    1.44
  -8   4   9   16.16    1.35
   7  -4  -9    6.38    1.01
   7   4  -9    4.75    0.76
  -7   4   9    7.29    0.97
   6  -4  -9   15.27    1.36
  -6   4   9   18.32    1.26
   6   4  -9   17.93    1.15
   5  -4  -9    4.49    0.88
  -5   4   9    5.01    0.72
   5   4  -9    4.31    0.65
   4  -4  -9    7.39    0.92
   4   4  -9    9.33    0.80
   3  -4  -9   -1.11    0.63
   3   4  -9    0.04    0.41
   2  -4  -9    6.57    0.86
   2   4  -9   10.23    0.60
  -2   4   9    9.64    1.08
   1  -4  -9   26.79    1.48
   1   4  -9   29.37    0.99
   0  -4  -9   -0.13    0.65
  -1  -4  -9    3.56    0.73
  -2  -4  -9   30.78    1.66
  -3  -4  -9    0.80    0.70
  -3   4  -9    0.01    0.24
  -3   4  -9   -0.05    0.25
  -4  -4  -9   10.92    1.17
  -4   4  -9    9.93    0.66
  -5  -4  -9   21.64    1.44
  -5   4  -9   20.25    1.00
  -6  -4  -9    5.79    0.97
  -6   4  -9    9.09    0.88
  -7  -4  -9   13.53    1.39
  -7   4  -9   13.13    1.05
  -8  -4  -9    7.63    1.10
  -8   4  -9    6.84    0.83
  -9  -4  -9    3.62    1.05
  -9   4  -9    2.83    0.82
 -10  -4  -9    5.71    1.17
 -10   4  -9    4.82    0.94
 -11  -4  -9    0.04    1.06
 -11   4  -9    1.60    0.94
 -12  -4  -9    0.87    1.16
 -12   4  -9   -0.63    1.01
 -13  -4  -9   -0.98    1.24
 -13   4  -9    0.88    1.17
  16  -5  -9    5.24    1.65
 -16   5   9    5.10    1.84
  15  -5  -9    3.85    1.52
 -15   5   9    1.91    1.49
  14  -5  -9    8.05    1.47
 -14   5   9    7.53    1.50
  13  -5  -9   16.92    1.67
 -13   5   9   17.68    1.96
  12  -5  -9    2.20    1.21
 -12   5   9    2.14    1.15
  11  -5  -9   76.39    3.27
 -11   5   9   72.72    3.17
  10  -5  -9    0.29    1.07
 -10   5   9    0.79    0.96
   9  -5  -9  120.68    4.44
  -9   5   9  118.85    4.36
   9   5  -9  116.21    4.36
   8  -5  -9    9.06    1.16
   8   5  -9    7.77    0.97
  -8   5   9    9.59    1.19
   7  -5  -9   94.13    3.63
  -7   5   9   96.37    3.55
   7   5  -9   94.23    3.41
   6  -5  -9   19.78    1.61
   6   5  -9   28.85    1.42
  -6   5   9   29.23    1.58
  -5   5   9   33.95    1.82
   5   5  -9   36.27    1.54
   4  -5  -9   16.63    1.43
   4   5  -9   23.17    1.14
  -4   5   9   25.34    1.49
   3  -5  -9    0.22    0.78
   3   5  -9    1.29    0.45
  -3   5   9    0.06    0.62
   2  -5  -9   51.54    2.32
   2   5  -9   52.69    1.82
   1  -5  -9    0.06    0.72
   1   5  -9   -0.19    0.26
   0  -5  -9   22.83    1.45
  -1  -5  -9    3.07    0.80
  -2  -5  -9    8.62    0.99
  -3  -5  -9    9.77    1.03
  -3   5  -9    9.82    0.50
  -3   5  -9    9.63    0.51
  -4  -5  -9   42.86    2.08
  -4   5  -9   45.13    1.60
  -4   5  -9   45.11    1.60
  -5  -5  -9   57.71    2.51
  -5   5  -9   58.54    2.09
  -6  -5  -9    0.87    0.90
  -6   5  -9    0.74    0.55
  -7  -5  -9   21.72    1.79
  -7   5  -9   20.97    1.24
  -8  -5  -9    0.73    1.01
  -8   5  -9    2.66    0.73
  -9  -5  -9   10.53    1.29
  -9   5  -9    9.32    0.96
 -10  -5  -9    9.09    1.42
 -10   5  -9    7.94    1.04
 -11  -5  -9   11.23    1.52
 -11   5  -9    9.03    1.18
 -12  -5  -9   24.71    2.31
 -12   5  -9   21.50    1.85
  15  -6  -9    0.77    1.46
 -15   6   9   -1.05    1.48
  14  -6  -9    3.14    1.37
 -14   6   9    1.98    1.50
  13  -6  -9    2.47    1.27
 -13   6   9    3.16    1.55
  12  -6  -9    0.11    1.12
 -12   6   9   -2.70    1.09
  11  -6  -9    5.65    1.32
 -11   6   9    4.81    1.21
  10  -6  -9   -0.38    1.09
 -10   6   9    0.80    1.07
   9  -6  -9    9.97    1.23
   9   6  -9    8.92    1.29
  -9   6   9    6.27    1.16
   8  -6  -9    6.06    1.11
  -8   6   9    6.77    1.10
   8   6  -9    6.85    1.05
   7  -6  -9    0.19    0.94
  -7   6   9    0.58    0.85
   7   6  -9    0.82    0.71
   6  -6  -9   25.40    1.81
  -6   6   9   30.18    1.74
   6   6  -9   32.21    1.56
   5  -6  -9    6.41    1.03
  -5   6   9    6.16    0.97
   5   6  -9    6.06    0.75
   4  -6  -9   17.27    1.52
   4   6  -9   22.82    1.16
  -4   6   9   21.65    1.45
   3  -6  -9   10.63    1.11
   3   6  -9    9.50    0.84
  -3   6   9   12.16    1.19
   2  -6  -9   -0.69    0.80
   2   6  -9    0.35    0.41
  -2   6   9    0.02    0.71
   1  -6  -9    7.05    0.98
  -1   6   9    6.57    0.85
   1   6  -9    6.23    0.56
   0  -6  -9    8.32    1.00
   0   6  -9    6.18    0.46
   0   6  -9    6.35    0.43
  -1  -6  -9    2.18    0.86
  -1   6  -9    2.49    0.24
  -1   6  -9    2.35    0.25
  -2  -6  -9    0.16    0.85
  -2   6  -9    0.90    0.24
  -2   6  -9    1.02    0.25
  -3  -6  -9    0.48    0.84
  -3   6  -9    1.87    0.34
  -3   6  -9    1.26    0.31
  -4  -6  -9   -0.11    0.87
  -4   6  -9   -0.19    0.39
  -4   6  -9   -0.18    0.38
  -5  -6  -9    0.16    0.90
  -5   6  -9    0.20    0.48
  -5   6  -9   -0.11    0.49
  -6  -6  -9    0.59    0.94
  -6   6  -9    0.88    0.56
  -7  -6  -9   -0.77    0.94
  -7   6  -9   -0.04    0.60
  -8  -6  -9    3.42    1.12
  -8   6  -9    2.88    0.75
  -9  -6  -9    2.06    1.16
  -9   6  -9    2.94    0.85
 -10  -6  -9   -1.63    1.10
 -10   6  -9    0.62    0.86
 -11  -6  -9    0.10    1.22
 -11   6  -9    0.19    0.95
 -12  -6  -9   -0.12    1.31
 -12   6  -9   -0.05    1.12
  15  -7  -9    2.31    1.55
 -15   7   9    0.18    1.55
  14  -7  -9   21.36    2.25
 -14   7   9   16.16    1.88
  13  -7  -9   25.52    2.19
 -13   7   9   17.27    1.91
  12  -7  -9   23.21    2.14
 -12   7   9   27.02    2.24
  11  -7  -9   78.05    3.55
 -11   7   9   88.36    3.63
  10  -7  -9   -0.83    1.13
 -10   7   9   -0.04    1.11
   9  -7  -9   34.03    2.19
  -9   7   9   30.95    2.24
   9   7  -9   35.45    2.21
   8  -7  -9   15.79    1.72
   8   7  -9   14.94    1.58
  -8   7   9   16.93    1.64
   7  -7  -9    9.85    1.25
  -7   7   9    7.67    1.17
   7   7  -9    7.33    0.98
   6  -7  -9   55.66    2.72
   6   7  -9   62.63    2.50
  -6   7   9   65.39    2.70
   5  -7  -9    0.68    0.96
   5   7  -9    2.58    0.71
  -5   7   9    1.05    0.88
   4  -7  -9   28.04    1.82
  -4   7   9   26.15    1.67
   4   7  -9   26.82    1.38
   3  -7  -9    0.75    0.94
   3   7  -9    0.49    0.56
  -3   7   9    0.42    0.83
   2  -7  -9   22.26    1.66
  -2   7   9   21.29    1.52
   2   7  -9   22.84    1.12
   1  -7  -9    2.73    0.97
   1   7  -9    1.85    0.46
  -1   7   9    3.09    0.85
   0  -7  -9   32.44    1.86
   0   7  -9   32.43    1.24
   0   7  -9   31.83    1.25
  -1  -7  -9    0.79    0.89
  -1   7  -9    0.83    0.36
  -1   7  -9    0.83    0.35
  -2  -7  -9   44.73    2.24
  -2   7  -9   46.37    1.62
  -2   7  -9   45.20    1.62
  -3  -7  -9   51.03    2.38
  -3   7  -9   49.40    1.77
  -3   7  -9   49.46    1.78
  -4  -7  -9   26.03    1.84
  -4   7  -9   27.80    1.18
  -4   7  -9   27.17    1.19
  -5  -7  -9   53.28    2.47
  -5   7  -9   49.52    1.92
  -5   7  -9   49.72    1.93
  -6  -7  -9   -0.08    0.98
  -6   7  -9   -0.75    0.62
  -6   7  -9    0.46    0.59
  -7  -7  -9   51.63    2.53
  -7   7  -9   47.67    2.02
  -8  -7  -9    0.03    1.12
  -8   7  -9    1.69    0.76
  -9  -7  -9   13.74    1.58
  -9   7  -9   16.02    1.32
 -10  -7  -9    0.83    1.28
 -10   7  -9    2.09    0.94
 -11  -7  -9    1.27    1.33
 -11   7  -9    0.39    1.04
  14  -8  -9    0.80    1.51
 -14   8   9    0.83    1.48
  13  -8  -9    1.14    1.44
 -13   8   9    1.03    1.56
  12  -8  -9    0.72    1.32
 -12   8   9   -0.16    1.38
  11  -8  -9    6.49    1.39
 -11   8   9    5.78    1.41
  10  -8  -9    3.22    1.23
 -10   8   9    1.17    1.18
   9  -8  -9    7.87    1.33
   9   8  -9    6.30    1.25
  -9   8   9    7.11    1.36
   8  -8  -9    4.64    1.26
   8   8  -9    6.35    1.15
  -8   8   9    3.53    1.21
   7  -8  -9    0.06    1.09
  -7   8   9   -1.50    1.00
   7   8  -9   -0.65    0.88
   6  -8  -9    3.65    1.17
  -6   8   9    4.63    1.13
   6   8  -9    3.80    0.89
   5  -8  -9    3.16    1.10
  -5   8   9    0.19    0.97
   5   8  -9    1.50    0.80
   4  -8  -9   23.95    1.83
  -4   8   9   22.61    1.68
   4   8  -9   24.43    1.42
   3  -8  -9    1.24    1.03
  -3   8   9   -0.06    0.92
   3   8  -9    0.56    0.63
   2  -8  -9   22.66    1.76
  -2   8   9   21.22    1.61
   2   8  -9   21.98    1.19
   1  -8  -9    6.98    1.15
   1   8  -9    7.28    0.68
  -1   8   9    7.90    1.06
   0  -8  -9    9.52    1.23
   0   8  -9   11.11    0.83
   0   8  -9   11.30    0.85
  -1  -8  -9    8.17    1.18
  -1   8  -9    8.17    0.77
  -1   8  -9    8.51    0.75
  -2  -8  -9    7.16    1.14
  -2   8  -9    8.09    0.78
  -2   8  -9    7.13    0.74
  -3  -8  -9   10.22    1.26
  -3   8  -9    8.51    0.80
  -3   8  -9    9.32    0.84
  -4  -8  -9    0.78    1.04
  -4   8  -9    3.10    0.59
  -4   8  -9    2.56    0.57
  -5  -8  -9    1.58    1.11
  -5   8  -9   -0.53    0.61
  -5   8  -9    0.23    0.57
  -6  -8  -9    2.27    1.15
  -6   8  -9    2.35    0.67
  -6   8  -9    1.90    0.74
  -7  -8  -9    5.69    1.26
  -7   8  -9    5.80    0.91
  -7   8  -9    5.49    0.82
  -8  -8  -9    2.25    1.26
  -8   8  -9    2.00    0.80
  -9  -8  -9    1.29    1.26
  -9   8  -9    1.91    0.89
 -10  -8  -9   -0.07    1.31
 -10   8  -9    1.69    1.00
 -11  -8  -9   -1.23    1.35
  13  -9  -9    9.53    3.07
 -13   9   9    8.69    1.66
  12  -9  -9    1.32    1.43
 -12   9   9    1.84    1.45
  11  -9  -9   34.95    2.57
 -11   9   9   39.60    2.58
  10  -9  -9   -3.33    1.17
 -10   9   9   -1.25    1.28
   9  -9  -9   52.37    2.82
  -9   9   9   58.63    2.91
   8  -9  -9    7.93    1.38
   8   9  -9    7.03    1.18
  -8   9   9    6.56    1.35
   7  -9  -9   15.32    1.56
   7   9  -9   14.14    1.38
  -7   9   9   17.23    1.85
   6  -9  -9   19.49    2.10
  -6   9   9   18.03    1.86
   6   9  -9   19.67    1.58
   5  -9  -9    0.30    1.14
  -5   9   9    1.40    1.13
   5   9  -9   -0.03    0.80
   4  -9  -9    3.77    1.16
   4   9  -9    4.19    0.82
  -4   9   9    4.85    1.15
   3  -9  -9    1.04    1.10
  -3   9   9    0.93    1.04
   3   9  -9    2.18    0.71
   2  -9  -9   11.56    1.37
  -2   9   9   11.18    1.28
   2   9  -9   11.60    1.11
   1  -9  -9    2.99    1.14
   1   9  -9    1.80    0.66
  -1   9   9    3.85    1.00
   0  -9  -9   18.95    1.72
   0   9  -9   15.82    1.06
   0   9  -9   16.23    1.12
  -1  -9  -9   16.13    1.68
  -1   9  -9   15.62    1.06
  -1   9  -9   16.98    1.12
  -2  -9  -9   43.28    2.32
  -2   9  -9   42.48    1.74
  -2   9  -9   39.78    1.69
  -3  -9  -9   14.41    1.46
  -3   9  -9   13.37    1.10
  -3   9  -9   13.47    1.03
  -4  -9  -9   11.48    1.39
  -4   9  -9   12.80    1.05
  -4   9  -9   13.10    1.15
  -5  -9  -9   48.02    2.50
  -5   9  -9   44.09    1.93
  -5   9  -9   43.65    1.89
  -6  -9  -9    1.67    1.16
  -6   9  -9    2.72    0.83
  -6   9  -9    0.93    0.70
  -7  -9  -9   13.27    1.51
  -7   9  -9   13.39    1.23
  -7   9  -9   11.32    1.14
  -8  -9  -9    5.31    1.49
  -8   9  -9    4.36    0.90
  -8   9  -9    3.64    1.05
  -9  -9  -9   -0.67    1.27
  -9   9  -9   -1.62    0.83
 -10  -9  -9    0.66    1.36
 -12  10   9    6.50    1.59
  11 -10  -9    0.00    1.51
 -11  10   9    2.05    1.49
  10 -10  -9    5.39    1.47
 -10  10   9    3.94    1.42
   9 -10  -9    7.36    1.65
  -9  10   9    7.36    1.48
   8 -10  -9    5.90    1.34
  -8  10   9    6.02    1.46
   7 -10  -9   12.32    1.58
   7  10  -9   13.54    1.39
  -7  10   9    9.10    1.47
   6 -10  -9   -1.64    1.09
   6  10  -9    0.31    1.00
  -6  10   9    2.70    1.29
   5 -10  -9   -0.63    1.15
   5  10  -9    0.37    0.97
  -5  10   9   -0.30    1.19
   4 -10  -9    0.63    1.12
  -4  10   9    0.94    1.19
   4  10  -9    1.50    0.90
   3 -10  -9    1.23    1.20
   3  10  -9    1.85    0.81
  -3  10   9   -0.78    1.14
   2 -10  -9   -0.04    1.11
  -2  10   9    3.03    1.18
   2  10  -9    1.59    0.78
   1 -10  -9   -0.10    1.12
   1  10  -9    0.69    0.74
  -1  10   9    0.08    1.02
   0 -10  -9    8.25    1.34
   0  10  -9    5.35    0.78
   0  10  -9    6.75    0.84
  -1 -10  -9    0.06    1.15
  -1  10  -9    1.49    0.67
  -1  10  -9    0.85    0.73
  -2 -10  -9    3.25    1.24
  -2  10  -9    4.21    0.79
  -2  10  -9    2.96    0.70
  -3 -10  -9    7.22    1.31
  -3  10  -9    5.39    0.78
  -3  10  -9    7.56    0.85
  -4 -10  -9    5.61    1.37
  -4  10  -9    2.73    0.81
  -4  10  -9    4.75    0.78
  -5 -10  -9    0.17    1.16
  -5  10  -9    1.09    0.81
  -5  10  -9   -0.26    0.73
  -6 -10  -9   -0.30    1.15
  -6  10  -9    0.54    0.79
  -6  10  -9    0.43    0.89
  -7 -10  -9    1.10    1.29
  -7  10  -9    1.53    0.86
  -7  10  -9    0.73    1.01
  -8 -10  -9   -1.14    1.27
  -8  10  -9    0.06    0.89
 -10  11   9   -1.26    1.41
   9 -11  -9    9.97    1.71
  -9  11   9    9.33    1.68
   8 -11  -9    6.71    1.50
  -8  11   9    4.18    1.41
   7 -11  -9    7.85    1.53
  -7  11   9    7.63    1.51
   6 -11  -9    5.83    1.46
  -6  11   9    4.85    1.40
   5 -11  -9   11.05    1.49
  -5  11   9   12.18    1.59
   5  11  -9    9.87    1.33
   4 -11  -9   21.26    1.99
   4  11  -9   18.40    1.80
  -4  11   9   18.53    2.08
   3 -11  -9    7.39    1.36
   3  11  -9    9.04    1.12
  -3  11   9    7.02    1.46
   2 -11  -9   11.64    1.46
   2  11  -9   10.91    1.14
  -2  11   9   11.05    1.51
   1 -11  -9    8.71    1.35
   1  11  -9    7.64    1.00
   0 -11  -9   10.23    1.37
   0  11  -9   12.68    1.22
   0  11  -9   15.10    1.44
  -1 -11  -9   24.28    2.01
  -1  11  -9   21.11    1.39
  -1  11  -9   21.20    1.59
  -2 -11  -9    7.50    1.38
  -2  11  -9    5.44    0.94
  -2  11  -9    7.35    0.88
  -3 -11  -9   20.87    2.06
  -3  11  -9   23.16    1.61
  -3  11  -9   23.12    1.48
  -4 -11  -9    5.89    1.34
  -4  11  -9    4.10    0.97
  -4  11  -9    4.18    0.87
  -5 -11  -9   15.19    1.67
  -5  11  -9   15.64    1.46
  -5  11  -9   20.09    1.63
  -6 -11  -9   -0.25    1.24
  -6  11  -9    0.03    0.85
  -6  11  -9   -1.07    0.99
  -7 -11  -9    7.71    1.53
  -7  11  -9    9.84    1.14
  -8  12   9   -2.13    1.34
   7 -12  -9   -2.59    1.34
  -7  12   9    1.83    1.51
   6 -12  -9    1.59    1.41
  -6  12   9    4.01    1.62
   5 -12  -9   10.97    1.65
  -5  12   9   11.02    1.66
   4 -12  -9    2.43    1.44
  -4  12   9    2.60    1.46
   3 -12  -9    6.75    1.44
  -3  12   9    7.02    1.56
   2 -12  -9    1.96    1.31
  -2  12   9    2.51    1.46
   2  12  -9   -2.05    1.02
   1 -12  -9    0.87    1.35
   1  12  -9    2.57    1.02
   0 -12  -9    8.24    1.39
   0  12  -9    5.13    1.11
   0  12  -9    6.57    0.98
  -1 -12  -9    4.26    1.32
  -1  12  -9    5.16    0.93
  -1  12  -9    5.99    1.14
  -2 -12  -9    0.88    1.23
  -2  12  -9   -0.62    0.82
  -2  12  -9   -0.43    0.95
  -3 -12  -9    0.61    1.24
  -3  12  -9   -0.13    0.86
  -3  12  -9    0.09    1.00
  -4 -12  -9    5.91    1.50
  -4  12  -9    3.38    1.13
  -4  12  -9    4.54    0.99
  -5 -12  -9    3.19    1.41
  -5  12  -9   -0.27    0.91
  -6  13   9    8.13    1.69
  -5  13   9    4.14    1.61
   4 -13  -9   14.31    1.83
  -4  13   9   15.59    1.82
   3 -13  -9    4.27    1.50
  -3  13   9    4.25    1.55
   2 -13  -9   24.65    2.36
  -2  13   9   25.83    2.40
   1 -13  -9   -1.38    1.36
   0 -13  -9    4.19    1.58
  -1 -13  -9   -0.91    1.36
  -1  13  -9    0.85    0.98
  -2 -13  -9    4.67    1.61
  -2  13  -9    0.84    1.01
  17   0 -10   17.69    1.83
  16   0 -10    6.92    1.52
  15   0 -10   37.18    2.43
  14   0 -10    1.54    1.17
 -14   0  10   -0.55    0.96
  13   0 -10   16.98    1.65
 -13   0  10   12.26    1.38
  12   0 -10    1.30    1.09
 -11   0  10   34.00    2.02
  11   0 -10   31.69    1.99
  10   0 -10   18.55    1.57
   9   0 -10   19.72    1.50
   8   0 -10   16.30    1.31
   7   0 -10   18.11    1.28
   6   0 -10  117.85    4.08
   6   0 -10  116.78    4.11
   5   0 -10    9.63    1.04
   5   0 -10    8.91    0.89
   4   0 -10  113.10    3.81
   4   0 -10  108.74    3.81
   3   0 -10  121.41    4.10
   3   0 -10  122.38    4.12
   2   0 -10    6.60    0.64
   2   0 -10    6.79    0.67
   1   0 -10   53.45    1.99
   1   0 -10   53.65    1.97
   0   0 -10   31.40    1.32
   0   0 -10   30.46    1.32
  -1   0 -10   40.23    1.59
  -1   0 -10   40.20    1.58
  -2   0 -10   -0.18    0.47
  -3   0 -10   20.55    1.09
  -4   0 -10    1.50    0.58
  -5   0 -10   41.79    1.78
  -6   0 -10   27.00    1.44
  -7   0 -10    0.73    0.74
  -8   0 -10   19.52    1.43
  -9   0 -10   -0.68    0.80
 -10   0 -10   46.93    2.29
 -11   0 -10    6.85    1.19
 -12   0 -10   16.05    1.56
 -13   0 -10   11.80    1.53
  17  -1 -10    1.61    1.36
  17   1 -10   -0.33    1.26
  16  -1 -10    0.82    1.31
  16   1 -10   -0.99    1.27
  15  -1 -10    6.23    1.41
  15   1 -10    6.52    1.42
  14  -1 -10   -1.65    1.13
 -14   1  10   -0.47    0.96
  14   1 -10    1.66    1.26
  13  -1 -10   -2.26    1.09
 -13   1  10    1.17    0.91
  13   1 -10   -1.25    1.06
  12  -1 -10    2.64    1.11
 -12  -1  10    4.97    1.30
 -12   1  10    3.61    0.92
  12   1 -10    2.33    1.04
  11  -1 -10   14.98    1.60
  11   1 -10   14.87    1.52
  10  -1 -10    0.43    0.94
  10   1 -10   -0.40    0.84
   9  -1 -10   -0.27    0.85
  -9   1  10   -1.95    0.99
   9   1 -10    0.52    0.80
   8  -1 -10    0.58    0.79
   8   1 -10    0.00    0.71
   7  -1 -10   33.64    1.78
   7   1 -10   32.39    1.60
   7   1 -10   31.63    1.63
   6  -1 -10   10.70    1.20
   6   1 -10   12.29    1.11
   6   1 -10   11.56    1.11
   5  -1 -10   21.23    1.35
   5  -1 -10   19.02    1.18
   5   1 -10   18.47    1.17
   5   1 -10   18.93    1.17
   4  -1 -10   11.10    1.11
   4  -1 -10   10.54    0.94
   4   1 -10   12.72    0.95
   4   1 -10   13.38    0.93
   3  -1 -10    0.27    0.57
   3  -1 -10    0.47    0.55
   3   1 -10   -0.04    0.46
   3   1 -10    0.51    0.49
   2  -1 -10   16.69    1.09
   2  -1 -10   16.65    1.07
   2   1 -10   17.93    0.95
   2   1 -10   18.55    0.95
   1  -1 -10    1.12    0.55
   1  -1 -10    0.74    0.53
   1   1 -10    1.29    0.44
   1   1 -10    1.21    0.41
   0  -1 -10    0.06    0.49
   0  -1 -10    0.62    0.53
   0   1 -10    0.41    0.38
   0   1 -10    0.36    0.40
  -1  -1 -10    9.97    0.92
  -1  -1 -10    8.81    0.92
  -1   1 -10    9.60    0.70
  -1   1 -10    8.41    0.71
  -2  -1 -10   -0.96    0.55
  -2  -1 -10    0.10    0.54
  -2   1 -10   -0.22    0.40
  -3  -1 -10    9.87    0.92
  -3   1 -10    9.14    0.80
  -4  -1 -10    2.86    0.66
  -4   1 -10    2.76    0.55
  -5  -1 -10    3.45    0.73
  -5   1 -10    2.55    0.61
  -6  -1 -10    3.87    0.78
  -6   1 -10    2.77    0.66
  -7  -1 -10   -0.26    0.76
  -7   1 -10   -0.58    0.65
  -8  -1 -10    0.30    0.85
  -8   1 -10    0.18    0.70
  -9  -1 -10    6.41    0.97
  -9   1 -10    5.33    0.90
 -10  -1 -10    1.21    1.00
 -10   1 -10    0.85    0.90
 -11  -1 -10    3.69    1.02
 -11   1 -10    3.12    1.09
 -12  -1 -10    3.98    1.15
 -12   1 -10    4.56    1.20
 -13  -1 -10    1.34    1.17
 -13   1 -10   -1.03    1.15
  17  -2 -10   15.81    1.89
  17   2 -10   12.85    1.86
  16  -2 -10   -0.84    1.34
  16   2 -10    1.18    1.29
  15  -2 -10   29.25    2.30
  15   2 -10   32.99    2.30
  14  -2 -10    6.27    1.35
 -14   2  10    7.52    1.34
  14   2 -10    5.96    1.27
  13  -2 -10   46.60    2.51
  13   2 -10   43.53    2.42
 -13   2  10   47.92    2.33
  12  -2 -10    2.83    1.09
  12   2 -10    0.36    1.02
 -12   2  10    0.77    0.91
  11  -2 -10    4.23    1.09
  11   2 -10    4.64    1.13
 -11   2  10    3.37    0.91
  10  -2 -10    2.43    1.01
 -10   2  10    1.66    0.81
  10   2 -10    1.66    0.89
   9  -2 -10   71.88    2.93
   9   2 -10   71.03    2.92
   8  -2 -10   52.69    2.34
   8   2 -10   51.53    2.22
   8   2 -10   53.96    2.38
   7  -2 -10   -0.02    0.76
   7   2 -10   -0.42    0.68
   6  -2 -10   63.86    2.58
   6   2 -10   67.17    2.49
   5  -2 -10   16.62    1.19
   5   2 -10   16.08    1.06
   5   2 -10   13.94    1.03
   4  -2 -10   79.71    2.95
   4  -2 -10   78.44    2.92
   4   2 -10   81.64    2.79
   4   2 -10   78.90    2.81
   3  -2 -10   32.21    1.58
   3  -2 -10   29.05    1.52
   3   2 -10   30.05    1.29
   3   2 -10   30.58    1.30
   2  -2 -10   30.18    1.48
   2  -2 -10   32.32    1.53
   2   2 -10   31.81    1.26
   2   2 -10   31.30    1.28
   1  -2 -10  107.69    3.71
   1  -2 -10  102.83    3.69
   1   2 -10  109.40    3.52
   1   2 -10  109.82    3.53
   0  -2 -10    6.91    0.76
   0  -2 -10    7.41    0.72
   0   2 -10    7.16    0.55
   0   2 -10    6.93    0.58
  -1  -2 -10   34.62    1.53
  -1  -2 -10   35.90    1.54
  -1   2 -10   33.96    1.27
  -2  -2 -10    0.52    0.58
  -2  -2 -10   -0.09    0.65
  -2   2 -10   -0.04    0.33
  -3  -2 -10   37.89    1.75
  -3  -2 -10   39.72    1.79
  -3   2 -10   39.39    1.48
  -4  -2 -10   12.65    1.17
  -4  -2 -10   13.80    1.12
  -4   2 -10   13.66    0.86
  -5  -2 -10   23.86    1.37
  -5   2 -10   23.90    1.19
  -6  -2 -10    0.32    0.77
  -6   2 -10    1.61    0.61
  -7  -2 -10   19.10    1.53
  -7   2 -10   20.16    1.28
  -8  -2 -10   31.10    1.89
  -8   2 -10   33.44    1.69
  -9  -2 -10    8.84    1.10
  -9   2 -10    8.17    0.98
 -10  -2 -10   43.31    2.34
 -10   2 -10   43.38    2.14
 -11  -2 -10    4.76    1.24
 -11   2 -10    3.89    1.02
 -12  -2 -10   12.68    1.53
 -12   2 -10   13.52    1.41
 -13  -2 -10    2.68    1.37
 -13   2 -10    1.77    1.29
  16  -3 -10    1.77    1.32
  16   3 -10    2.50    1.32
  15  -3 -10    7.15    1.45
 -15   3  10    4.75    1.39
  15   3 -10    5.02    1.37
  14  -3 -10    1.71    1.21
 -14   3  10   -0.63    1.29
  14   3 -10   -1.07    1.09
  13  -3 -10    2.31    1.25
 -13   3  10    3.54    1.13
  13   3 -10    2.89    1.11
  12  -3 -10    0.45    1.10
 -12   3  10    0.81    1.01
  11  -3 -10    0.13    1.00
 -11   3  10    0.25    0.98
  10  -3 -10    3.57    1.06
 -10   3  10    1.80    0.85
   9  -3 -10    0.16    1.00
  -9   3  10    3.28    0.91
   8  -3 -10   26.01    1.72
   8   3 -10   30.10    1.73
   7  -3 -10    1.63    0.85
   7   3 -10    2.24    0.78
   6  -3 -10    6.88    0.94
   6   3 -10    7.56    0.80
  -6   3  10    7.42    0.87
   5  -3 -10   -0.10    0.79
   5   3 -10   -0.60    0.57
   4  -3 -10   13.21    1.25
   4   3 -10    8.52    0.84
   3  -3 -10    0.48    0.64
   3   3 -10   -0.20    0.44
   2  -3 -10   -0.36    0.67
   2  -3 -10    0.80    0.89
   2   3 -10    0.26    0.37
   1  -3 -10    1.53    0.64
   1  -3 -10    1.09    0.79
   1   3 -10    2.54    0.33
   0  -3 -10    6.99    0.81
   0  -3 -10    6.61    0.77
   0   3 -10    7.30    0.44
   0   3 -10    6.66    0.42
  -1  -3 -10    5.07    0.85
  -1  -3 -10    4.77    0.71
  -1   3 -10    4.00    0.35
  -2  -3 -10   -0.21    0.68
  -2  -3 -10   -0.72    0.77
  -2   3 -10    0.02    0.25
  -3  -3 -10    0.33    0.72
  -3  -3 -10    0.29    0.65
  -3   3 -10   -0.25    0.32
  -4  -3 -10    0.07    0.76
  -4  -3 -10   -0.77    0.88
  -4   3 -10   -0.29    0.37
  -5  -3 -10    3.90    0.88
  -5  -3 -10    5.30    1.12
  -5   3 -10    4.65    0.58
  -6  -3 -10    1.20    0.79
  -6   3 -10    1.68    0.57
  -7  -3 -10    0.30    0.79
  -7   3 -10   -0.39    0.59
  -8  -3 -10   14.56    1.35
  -8   3 -10   13.79    1.23
  -9  -3 -10    3.62    1.02
  -9   3 -10    3.75    0.84
 -10  -3 -10    1.13    1.07
 -10   3 -10   -0.69    0.81
 -11  -3 -10    2.69    1.23
 -11   3 -10   -0.62    0.95
 -12  -3 -10    0.15    1.24
 -12   3 -10   -0.54    1.02
  16  -4 -10    0.05    1.35
  16   4 -10    2.71    1.35
  15  -4 -10   13.59    1.77
 -15   4  10    9.72    1.65
  15   4 -10   14.20    1.62
  14  -4 -10    0.31    1.40
 -14   4  10    0.09    1.29
  13  -4 -10    9.66    1.45
 -13   4  10   11.86    1.41
  12  -4 -10    2.45    1.22
 -12   4  10    4.30    1.24
  11  -4 -10   19.20    1.84
 -11   4  10   17.83    1.62
  10  -4 -10   19.73    1.75
 -10   4  10   18.13    1.55
   9  -4 -10   37.28    2.05
  -9   4  10   34.76    1.86
   9   4 -10   31.77    2.06
   8  -4 -10   83.91    3.36
  -8   4  10   87.61    3.23
   8   4 -10   82.51    3.17
   7  -4 -10    9.14    1.09
  -7   4  10    8.71    0.96
   7   4 -10    9.07    0.96
   6  -4 -10  124.89    4.49
   6   4 -10  125.55    4.29
   5  -4 -10   18.33    1.41
   5   4 -10   19.37    1.17
   4  -4 -10  203.89    7.01
   4   4 -10  210.88    6.77
  -4   4  10  211.42    7.03
   3  -4 -10   25.51    1.51
   3   4 -10   26.31    1.15
   2  -4 -10   51.30    2.22
   2   4 -10   54.12    1.84
   1  -4 -10   64.44    2.59
   1   4 -10   67.14    2.16
   0  -4 -10   25.04    1.45
  -1  -4 -10   32.56    1.64
  -2  -4 -10    0.19    0.79
  -3  -4 -10   19.68    1.36
  -3   4 -10   18.40    0.77
  -4  -4 -10    0.07    0.75
  -4   4 -10    0.77    0.37
  -5  -4 -10    8.81    1.01
  -5   4 -10    7.60    0.74
  -6  -4 -10   11.88    1.22
  -6   4 -10   11.67    0.95
  -7  -4 -10   29.23    1.90
  -7   4 -10   27.21    1.42
  -8  -4 -10   23.45    1.69
  -8   4 -10   21.17    1.37
  -9  -4 -10    2.08    1.02
  -9   4 -10    2.84    0.80
 -10  -4 -10   22.83    1.99
 -10   4 -10   17.30    1.57
 -11  -4 -10    0.86    1.12
 -11   4 -10    0.59    0.96
 -12  -4 -10    8.99    1.42
 -12   4 -10   10.18    1.31
  16  -5 -10    3.00    1.51
  15  -5 -10    2.62    1.36
 -15   5  10    4.46    2.20
  14  -5 -10   -0.16    1.25
 -14   5  10    0.52    1.38
  13  -5 -10    0.00    1.24
 -13   5  10    1.13    1.27
  12  -5 -10    4.91    1.32
 -12   5  10    5.77    1.29
  11  -5 -10    0.77    1.15
 -11   5  10    1.54    1.07
  10  -5 -10    1.81    1.10
 -10   5  10    2.94    1.03
   9  -5 -10    1.66    1.08
  -9   5  10    2.24    0.94
   9   5 -10    2.55    0.97
   8  -5 -10    6.21    1.13
  -8   5  10    5.27    0.98
   8   5 -10    4.94    0.97
   7  -5 -10   62.22    2.71
  -7   5  10   60.13    2.57
   7   5 -10   62.40    2.48
   6  -5 -10   14.27    1.47
  -6   5  10   13.91    1.26
   6   5 -10   14.03    1.20
   5  -5 -10    7.85    1.04
   5   5 -10    8.27    0.77
  -5   5  10    6.50    0.88
   4  -5 -10   19.66    1.47
   4   5 -10   18.99    1.08
   3  -5 -10   -0.07    0.77
   3   5 -10   -0.23    0.44
   2  -5 -10    7.75    0.99
   2   5 -10    7.02    0.61
   1  -5 -10    0.44    0.77
   1   5 -10    0.35    0.28
   0  -5 -10    0.77    0.79
  -1  -5 -10    1.90    0.82
  -2  -5 -10    0.44    0.78
  -3  -5 -10    3.14    0.97
  -3   5 -10    2.89    0.30
  -3   5 -10    3.80    0.38
  -4  -5 -10   12.86    1.35
  -4   5 -10   12.11    0.72
  -5  -5 -10   13.31    1.40
  -5   5 -10   12.95    0.86
  -6  -5 -10    0.35    0.90
  -6   5 -10    1.83    0.56
  -7  -5 -10    2.99    0.97
  -7   5 -10    3.96    0.72
  -8  -5 -10    2.51    1.16
  -8   5 -10    5.08    0.78
  -9  -5 -10    0.67    1.07
  -9   5 -10    1.31    0.76
 -10  -5 -10    2.78    1.21
 -10   5 -10    1.77    0.90
 -11  -5 -10    1.08    1.22
 -11   5 -10    1.39    0.99
 -12  -5 -10    0.76    1.28
 -12   5 -10    1.33    1.10
  15  -6 -10   10.87    1.68
  14  -6 -10   -0.50    1.24
 -14   6  10    0.26    1.65
  13  -6 -10   18.12    1.76
 -13   6  10   14.75    1.72
  12  -6 -10    2.04    1.25
 -12   6  10    0.79    1.23
  11  -6 -10   69.71    3.18
 -11   6  10   67.25    3.10
  10  -6 -10    7.32    1.30
 -10   6  10    5.92    1.16
   9  -6 -10   29.52    2.04
   9   6 -10   26.53    1.78
  -9   6  10   27.55    1.86
   8  -6 -10    5.55    1.19
   8   6 -10    7.74    1.07
  -8   6  10    4.94    1.06
   7  -6 -10   17.17    1.68
   7   6 -10   17.49    1.40
  -7   6  10   18.66    1.51
   6  -6 -10    8.84    1.14
  -6   6  10    5.69    1.02
   6   6 -10    8.06    0.89
   5  -6 -10   41.90    2.13
   5   6 -10   35.05    1.71
  -5   6  10   39.80    2.03
   4  -6 -10   -0.07    0.91
   4   6 -10    0.53    0.58
  -4   6  10    2.37    0.80
   3  -6 -10   14.25    1.47
   3   6 -10   14.56    0.96
  -3   6  10   15.32    1.27
   2  -6 -10   27.96    1.72
   2   6 -10   26.84    1.10
  -2   6  10   22.26    1.37
   1  -6 -10   13.17    1.38
   1   6 -10   13.28    0.70
   0  -6 -10    1.44    0.86
   0   6 -10    1.30    0.23
  -1  -6 -10   19.25    1.52
  -2  -6 -10    5.61    1.01
  -2   6 -10    5.05    0.33
  -2   6 -10    4.59    0.33
  -3  -6 -10   37.05    2.01
  -3   6 -10   37.98    1.33
  -3   6 -10   38.43    1.34
  -4  -6 -10    7.10    1.12
  -4   6 -10    7.08    0.66
  -4   6 -10    9.44    0.65
  -5  -6 -10   47.52    2.43
  -5   6 -10   44.42    1.72
  -6  -6 -10   40.59    2.19
  -6   6 -10   39.46    1.67
  -7  -6 -10    0.98    0.99
  -7   6 -10   -0.06    0.63
  -8  -6 -10   12.45    1.50
  -8   6 -10   13.79    1.24
  -9  -6 -10    3.19    1.19
  -9   6 -10    1.86    0.84
 -10  -6 -10   13.15    1.58
 -10   6 -10   13.58    1.51
 -11  -6 -10    2.77    1.29
 -11   6 -10    4.27    1.09
  14  -7 -10    6.10    1.50
 -14   7  10    1.16    1.62
  13  -7 -10    3.13    1.37
 -13   7  10    0.25    1.44
  12  -7 -10    0.74    1.16
 -12   7  10   -2.21    1.29
  11  -7 -10   -1.37    1.14
 -11   7  10    0.42    1.24
  10  -7 -10   -1.04    1.11
 -10   7  10    3.63    1.23
   9  -7 -10    0.27    1.12
   9   7 -10    1.28    1.14
  -9   7  10   -0.60    1.02
   8  -7 -10    2.64    1.14
   8   7 -10    4.06    0.94
  -8   7  10    1.74    1.05
   7  -7 -10    1.32    1.08
  -7   7  10    1.63    1.01
   7   7 -10    2.75    0.88
   6  -7 -10   -0.24    1.03
   6   7 -10   -0.95    0.73
  -6   7  10   -1.38    0.89
   5  -7 -10    9.71    1.22
   5   7 -10   10.18    0.89
  -5   7  10    9.53    1.14
   4  -7 -10    3.18    1.08
  -4   7  10    2.37    1.00
   4   7 -10    3.02    0.67
   3  -7 -10    2.21    1.01
  -3   7  10    1.66    0.87
   3   7 -10    1.57    0.59
   2  -7 -10    2.46    1.02
   2   7 -10    3.77    0.55
  -2   7  10    4.33    0.90
   1  -7 -10   10.70    1.23
   1   7 -10   11.86    0.77
   0  -7 -10    1.65    0.94
   0   7 -10    0.49    0.37
   0   7 -10    1.46    0.35
  -1  -7 -10    4.79    1.05
  -1   7 -10    4.22    0.38
  -1   7 -10    4.09    0.46
  -2  -7 -10    9.31    1.21
  -2   7 -10   10.40    0.61
  -2   7 -10    9.95    0.59
  -3  -7 -10   -0.30    0.92
  -3   7 -10   -0.47    0.32
  -3   7 -10   -0.49    0.35
  -4  -7 -10    6.68    1.18
  -4   7 -10    7.56    0.71
  -4   7 -10    7.48    0.70
  -5  -7 -10   -0.64    1.00
  -5   7 -10   -0.22    0.49
  -5   7 -10   -0.92    0.52
  -6  -7 -10    8.40    1.26
  -6   7 -10    9.18    0.95
  -7  -7 -10    4.14    1.16
  -7   7 -10    3.68    0.72
  -8  -7 -10    3.72    1.22
  -8   7 -10    4.39    0.81
  -9  -7 -10   -1.06    1.16
  -9   7 -10   -0.84    0.77
 -10  -7 -10   -0.94    1.23
 -10   7 -10    2.04    0.95
  14  -8 -10   -1.93    1.53
  13  -8 -10    2.39    1.45
 -13   8  10    4.14    1.63
  12  -8 -10    4.66    1.37
 -12   8  10    3.91    1.55
  11  -8 -10   10.94    1.46
 -11   8  10    7.67    1.55
  10  -8 -10   20.22    1.95
 -10   8  10   18.66    2.05
   9  -8 -10    1.58    1.22
  -9   8  10   -0.65    1.16
   9   8 -10    1.62    1.24
   8  -8 -10   37.99    2.36
   8   8 -10   37.21    2.16
  -8   8  10   34.70    2.21
   7  -8 -10    1.08    1.19
   7   8 -10   -0.87    0.91
  -7   8  10    1.91    1.15
   6  -8 -10   13.23    1.47
  -6   8  10   12.12    1.32
   6   8 -10   15.57    1.47
   5  -8 -10    1.28    1.13
  -5   8  10    0.95    1.02
   5   8 -10    1.50    0.77
   4  -8 -10   19.78    1.78
   4   8 -10   18.49    1.34
  -4   8  10   16.74    1.60
   3  -8 -10    1.06    1.05
   3   8 -10    1.19    0.65
  -3   8  10    1.08    0.95
   2  -8 -10   42.07    2.32
  -2   8  10   44.60    2.18
   2   8 -10   43.49    1.78
   1  -8 -10    7.34    1.21
   1   8 -10    7.69    0.82
   0  -8 -10   11.44    1.34
   0   8 -10   12.53    0.81
   0   8 -10   12.70    0.81
  -1  -8 -10   18.21    1.74
  -1   8 -10   20.89    0.97
  -1   8 -10   20.03    0.98
  -2  -8 -10    0.30    1.00
  -2   8 -10   -0.10    0.43
  -2   8 -10    0.10    0.41
  -3  -8 -10   33.83    2.12
  -3   8 -10   35.38    1.42
  -3   8 -10   36.64    1.44
  -4  -8 -10    3.93    1.12
  -4   8 -10    2.74    0.55
  -4   8 -10    3.69    0.56
  -5  -8 -10   31.08    2.05
  -5   8 -10   30.00    1.44
  -5   8 -10   30.11    1.40
  -6  -8 -10   23.48    1.95
  -6   8 -10   20.17    1.24
  -6   8 -10   20.34    1.36
  -7  -8 -10   17.72    1.90
  -7   8 -10   15.71    1.25
  -8  -8 -10    3.32    1.31
  -8   8 -10    4.78    0.86
  -9  -8 -10    1.35    1.29
  -9   8 -10    0.73    0.88
 -10  -8 -10    8.41    1.57
 -10   8 -10   10.42    1.22
  13  -9 -10    0.76    1.53
  12  -9 -10   -0.09    1.45
 -12   9  10    2.04    1.54
  11  -9 -10    7.93    1.54
 -11   9  10    8.29    1.63
  10  -9 -10    6.38    1.35
 -10   9  10    4.67    1.70
   9  -9 -10    4.94    1.31
  -9   9  10    4.59    1.45
   8  -9 -10   -1.05    1.18
   8   9 -10    2.50    1.47
  -8   9  10    3.23    1.30
   7  -9 -10    4.61    1.31
   7   9 -10    6.17    1.18
  -7   9  10    6.01    1.36
   6  -9 -10    2.55    1.19
   6   9 -10    1.23    0.96
  -6   9  10    1.92    1.13
   5  -9 -10    7.29    1.36
   5   9 -10    8.62    1.05
  -5   9  10   10.04    1.30
   4  -9 -10   -0.26    1.10
  -4   9  10    1.67    1.06
   4   9 -10   -1.48    0.73
   3  -9 -10    3.83    1.22
  -3   9  10    3.24    1.12
   3   9 -10    4.73    0.81
   2  -9 -10    1.85    1.13
   2   9 -10    2.35    0.70
  -2   9  10    3.45    1.07
   1  -9 -10    6.75    1.37
   1   9 -10    8.18    0.80
   0  -9 -10    9.72    1.31
   0   9 -10    7.92    0.89
   0   9 -10    8.01    0.75
  -1  -9 -10    4.10    1.19
  -1   9 -10    4.58    0.62
  -1   9 -10    4.58    0.63
  -2  -9 -10   10.40    1.40
  -2   9 -10   10.44    0.96
  -2   9 -10   13.39    0.96
  -3  -9 -10    0.10    1.12
  -3   9 -10   -0.35    0.55
  -3   9 -10   -0.33    0.54
  -4  -9 -10    7.15    1.34
  -4   9 -10    6.85    0.73
  -4   9 -10    7.12    0.72
  -5  -9 -10    1.39    1.17
  -5   9 -10   -0.78    0.64
  -5   9 -10    0.60    0.64
  -6  -9 -10    2.09    1.20
  -6   9 -10   -0.03    0.68
  -6   9 -10    0.10    0.76
  -7  -9 -10    7.21    1.42
  -7   9 -10    8.14    1.02
  -7   9 -10    7.95    0.92
  -8  -9 -10    0.26    1.33
  -8   9 -10    2.23    0.83
  -9  -9 -10    6.70    1.56
  -9   9 -10    8.09    1.07
  11 -10 -10    8.69    1.71
 -11  10  10    8.44    1.70
  10 -10 -10   27.43    2.33
 -10  10  10   17.10    1.93
   9 -10 -10   13.24    1.79
  -9  10  10   10.61    1.71
   8 -10 -10   46.84    2.67
  -8  10  10   48.32    3.07
   7 -10 -10   -0.52    1.29
  -7  10  10   -2.78    1.32
   6 -10 -10   35.33    2.31
   6  10 -10   37.44    2.11
  -6  10  10   37.10    2.43
   5 -10 -10    3.63    1.23
   5  10 -10    1.93    1.00
  -5  10  10    2.55    1.40
   4 -10 -10   34.99    2.23
  -4  10  10   30.53    2.26
   4  10 -10   34.28    1.90
   3 -10 -10   24.35    2.02
   3  10 -10   19.64    1.52
  -3  10  10   19.12    1.94
   2 -10 -10    6.39    1.30
  -2  10  10    9.86    1.45
   2  10 -10    6.04    0.89
   1 -10 -10   43.74    2.48
   1  10 -10   39.83    1.89
   0 -10 -10    1.28    1.19
   0  10 -10   -0.68    0.59
   0  10 -10    0.37    0.69
  -1 -10 -10   62.14    2.97
  -1  10 -10   61.62    2.33
  -1  10 -10   60.58    2.39
  -2 -10 -10    0.58    1.28
  -2  10 -10    0.44    0.67
  -2  10 -10    0.39    0.61
  -3 -10 -10   39.01    2.42
  -3  10 -10   38.89    1.76
  -3  10 -10   37.96    1.73
  -4 -10 -10    0.66    1.24
  -4  10 -10    0.71    0.69
  -4  10 -10    0.02    0.70
  -5 -10 -10   26.05    2.18
  -5  10 -10   22.36    1.49
  -5  10 -10   22.25    1.41
  -6 -10 -10    5.46    1.41
  -6  10 -10    7.11    0.98
  -6  10 -10    6.81    0.92
  -7 -10 -10    3.68    1.35
  -7  10 -10    4.07    0.93
  -7  10 -10    5.46    1.04
  10 -11 -10    1.69    1.61
 -10  11  10    1.45    1.57
   9 -11 -10   -0.08    1.44
  -9  11  10    3.06    1.55
   8 -11 -10    1.04    1.38
  -8  11  10   -1.63    1.41
   7 -11 -10    2.53    1.35
  -7  11  10    0.87    1.54
   6 -11 -10    2.59    1.30
  -6  11  10    0.06    1.44
   5 -11 -10    0.00    1.14
  -5  11  10    0.90    1.36
   5  11 -10    1.23    1.12
   4 -11 -10    2.88    1.19
   4  11 -10   -0.99    1.00
  -4  11  10    1.13    1.38
   3 -11 -10    0.11    1.08
  -3  11  10   -0.89    1.31
   3  11 -10    2.14    0.97
   2 -11 -10    1.42    1.21
  -2  11  10    0.81    1.31
   2  11 -10    0.12    0.91
   1 -11 -10    7.22    1.33
   1  11 -10    4.49    0.93
   0 -11 -10   -0.10    1.21
   0  11 -10    0.94    0.84
  -1 -11 -10    0.21    1.25
  -1  11 -10    1.33    0.84
  -1  11 -10    1.18    0.74
  -2 -11 -10    5.28    1.32
  -2  11 -10    4.10    0.87
  -2  11 -10    2.99    0.79
  -3 -11 -10   -0.20    1.19
  -3  11 -10    0.20    0.73
  -3  11 -10    0.92    0.79
  -4 -11 -10    1.19    1.33
  -4  11 -10    0.43    0.76
  -4  11 -10    1.33    0.87
  -5 -11 -10    2.67    1.37
  -5  11 -10   -1.36    0.88
  -5  11 -10    0.06    0.80
  -6 -11 -10    1.15    1.28
  -6  11 -10    3.16    1.00
  -6  11 -10    2.31    0.90
   7 -12 -10    1.24    1.46
  -7  12  10    0.53    1.54
   6 -12 -10   21.98    2.32
  -6  12  10   28.30    2.50
   5 -12 -10   -1.00    1.36
  -5  12  10    0.79    1.50
   4 -12 -10   11.19    1.59
  -4  12  10   11.21    1.75
   3 -12 -10    6.90    1.46
  -3  12  10    7.46    1.65
   2 -12 -10    2.51    1.34
   2  12 -10    2.69    1.09
   1 -12 -10   23.12    2.11
   1  12 -10   19.23    1.75
   0 -12 -10    3.17    1.30
   0  12 -10    3.34    1.05
  -1 -12 -10    5.13    1.35
  -1  12 -10    3.44    1.03
  -1  12 -10    4.37    0.90
  -2 -12 -10   -1.85    1.23
  -2  12 -10    0.73    0.96
  -2  12 -10    0.73    0.81
  -3 -12 -10   14.30    1.77
  -3  12 -10   13.98    1.41
  -3  12 -10   12.01    1.22
  -4 -12 -10    0.52    1.37
  -4  12 -10    0.91    0.97
   3 -13 -10    6.00    1.61
   2 -13 -10   -0.48    1.53
   1 -13 -10   -0.45    1.41
  16   0 -11   -0.67    1.44
  15   0 -11   -0.37    1.24
  14   0 -11   -0.53    1.18
  13   0 -11    0.00    1.07
  12   0 -11   -0.03    1.02
  11   0 -11    1.03    1.00
  10   0 -11   -0.38    0.90
   9   0 -11    0.30    0.82
   8   0 -11   -0.74    0.75
   7   0 -11   -0.14    0.92
   7   0 -11   -0.38    0.78
   6   0 -11   -1.05    0.71
   6   0 -11    0.40    0.78
   5   0 -11    0.36    0.67
   5   0 -11    0.68    0.66
   4   0 -11   -0.78    0.59
   4   0 -11   -0.76    0.61
   3   0 -11    0.11    0.53
   3   0 -11   -0.40    0.57
   2   0 -11    0.43    0.54
   2   0 -11   -0.15    0.51
   1   0 -11    0.66    0.49
   1   0 -11    0.12    0.52
   0   0 -11    0.21    0.52
   0   0 -11    0.23    0.48
  -1   0 -11   -0.54    0.52
  -1   0 -11   -0.45    0.49
  -2   0 -11   -0.08    0.51
  -2   0 -11   -0.81    0.55
  -3   0 -11    0.03    0.54
  -4   0 -11    0.01    0.57
  -5   0 -11    0.37    0.64
  -6   0 -11    0.63    0.68
  -7   0 -11    0.06    0.73
  -8   0 -11   -0.05    0.80
  -9   0 -11   -0.96    0.84
 -10   0 -11    0.74    0.94
 -11   0 -11    2.05    1.03
 -12   0 -11    1.59    1.18
  16  -1 -11    3.81    1.39
  16   1 -11    0.60    1.48
  15  -1 -11   12.79    1.61
  15   1 -11   10.06    1.54
  14  -1 -11   34.24    2.34
  14   1 -11   32.38    2.47
  13  -1 -11    3.43    1.22
  13   1 -11    5.68    1.28
  12  -1 -11   46.41    2.48
  12   1 -11   47.05    2.43
  11  -1 -11    0.50    1.01
 -11   1  11    0.66    0.90
  11   1 -11    0.54    0.93
  10  -1 -11   41.15    2.16
  10   1 -11   39.81    2.09
   9  -1 -11   15.84    1.61
   9   1 -11   10.64    1.13
   8  -1 -11    1.03    0.81
   8   1 -11    0.84    1.05
   8   1 -11   -0.41    0.81
   7  -1 -11    4.35    0.85
   7   1 -11    5.31    0.88
   7   1 -11    2.69    0.82
   6  -1 -11   21.78    1.59
   6  -1 -11   21.04    1.35
   6   1 -11   21.58    1.37
   6   1 -11   19.72    1.34
   5  -1 -11   63.05    2.47
   5  -1 -11   62.11    2.51
   5   1 -11   64.80    2.44
   5   1 -11   62.80    2.42
   4  -1 -11   55.58    2.21
   4  -1 -11   54.65    2.25
   4   1 -11   57.17    2.18
   4   1 -11   57.04    2.18
   3  -1 -11  135.47    4.64
   3  -1 -11  138.16    4.67
   3   1 -11  137.80    4.58
   3   1 -11  138.18    4.58
   2  -1 -11    3.14    0.65
   2  -1 -11    1.92    0.66
   2   1 -11    2.33    0.53
   2   1 -11    2.73    0.56
   1  -1 -11  101.17    3.53
   1  -1 -11  101.76    3.54
   1   1 -11  101.92    3.44
   1   1 -11  103.13    3.44
   0  -1 -11    0.18    0.55
   0  -1 -11    0.01    0.57
   0   1 -11    0.37    0.44
   0   1 -11   -0.06    0.46
  -1  -1 -11   94.73    3.27
  -1  -1 -11   93.08    3.26
  -1   1 -11   92.12    3.15
  -1   1 -11   91.54    3.14
  -2  -1 -11   27.66    1.47
  -2  -1 -11   28.64    1.39
  -2   1 -11   28.05    1.25
  -3  -1 -11   64.68    2.50
  -3  -1 -11   66.47    2.50
  -3   1 -11   65.51    2.36
  -4  -1 -11   33.82    1.65
  -4   1 -11   36.31    1.53
  -5  -1 -11    0.53    0.66
  -5   1 -11   -0.44    0.57
  -6  -1 -11   25.06    1.51
  -6   1 -11   25.81    1.42
  -7  -1 -11    2.90    0.82
  -7   1 -11    2.48    0.77
  -8  -1 -11   15.11    1.34
  -8   1 -11   14.62    1.29
  -9  -1 -11    0.45    0.92
  -9   1 -11    2.10    0.86
 -10  -1 -11   15.04    1.65
 -10   1 -11   15.47    1.52
 -11  -1 -11   30.72    2.10
 -11   1 -11   29.75    1.98
 -12  -1 -11    5.61    1.32
 -12   1 -11    4.98    1.21
  16  -2 -11    1.55    1.36
  16   2 -11    1.66    1.46
  15  -2 -11    2.56    1.46
  15   2 -11   -0.88    1.21
  14  -2 -11    6.31    1.37
  14   2 -11    5.75    1.28
  13  -2 -11    2.32    1.15
  13   2 -11    1.49    1.06
 -13   2  11    0.51    1.12
  12  -2 -11   -0.94    1.06
 -12   2  11    0.33    0.92
  12   2 -11    0.19    0.97
  11  -2 -11    1.75    1.04
 -11   2  11   -1.97    1.16
  11   2 -11    0.44    0.93
  10  -2 -11    2.17    1.03
  10   2 -11    4.30    1.04
   9  -2 -11   -1.53    0.98
   9   2 -11    0.56    0.80
   8  -2 -11    0.86    0.85
   8   2 -11    1.45    0.95
   8   2 -11    2.11    0.78
   7  -2 -11    0.75    0.80
   7   2 -11   -0.05    0.64
   7   2 -11   -1.14    0.73
   6  -2 -11   55.69    2.42
   6   2 -11   57.11    2.24
   6   2 -11   53.90    2.23
   5  -2 -11   23.29    1.40
   5   2 -11   20.69    1.26
   5   2 -11   22.17    1.24
   4  -2 -11    0.46    0.75
   4  -2 -11   -0.17    0.63
   4   2 -11   -0.63    0.51
   4   2 -11    0.48    0.54
   3  -2 -11   12.28    1.24
   3  -2 -11   13.34    1.17
   3   2 -11   11.12    0.88
   3   2 -11   11.97    0.89
   2  -2 -11    0.63    0.66
   2  -2 -11   -0.46    0.72
   2   2 -11    0.07    0.45
   2   2 -11   -0.12    0.44
   1  -2 -11   18.76    1.27
   1  -2 -11   17.45    1.15
   1   2 -11   18.66    0.94
   1   2 -11   19.97    0.94
   0  -2 -11   -0.19    0.63
   0  -2 -11   -0.63    0.63
   0   2 -11    0.25    0.37
   0   2 -11   -0.24    0.37
  -1  -2 -11   17.68    1.23
  -1  -2 -11   17.90    1.24
  -1   2 -11   18.59    0.86
  -1   2 -11   16.68    0.88
  -2  -2 -11    0.30    0.64
  -2  -2 -11   -0.12    0.66
  -2   2 -11    0.42    0.40
  -3  -2 -11    1.46    0.76
  -3  -2 -11    0.70    0.69
  -3   2 -11    0.70    0.44
  -4  -2 -11    0.25    0.80
  -4  -2 -11   -0.10    0.68
  -4   2 -11    0.67    0.49
  -5  -2 -11   10.14    1.01
  -5   2 -11   11.79    0.93
  -6  -2 -11   -1.71    0.65
  -6   2 -11   -1.01    0.60
  -7  -2 -11    2.57    0.82
  -7   2 -11    1.82    0.70
  -8  -2 -11    2.10    0.89
  -8   2 -11    2.49    0.77
  -9  -2 -11    0.48    1.01
  -9   2 -11    0.58    0.82
 -10  -2 -11    6.68    1.12
 -10   2 -11    4.16    1.00
 -11  -2 -11    2.23    1.09
 -11   2 -11    1.96    1.06
 -12  -2 -11   -0.57    1.20
 -12   2 -11    1.44    1.15
  16  -3 -11   11.99    1.72
  16   3 -11   11.73    1.61
  15  -3 -11   32.70    2.41
  15   3 -11   31.50    2.32
  14  -3 -11    7.59    1.47
  14   3 -11    6.56    1.33
  13  -3 -11   58.03    2.86
 -13   3  11   54.74    2.71
  13   3 -11   51.36    2.80
  12  -3 -11   26.82    2.05
  12   3 -11   24.45    1.85
 -12   3  11   25.41    1.90
  11  -3 -11    2.24    1.12
 -11   3  11    4.79    0.97
  11   3 -11    2.01    0.99
   9  -3 -11    4.04    1.02
   9   3 -11    2.95    1.12
   8  -3 -11   78.79    3.08
  -8   3  11   76.01    3.83
   8   3 -11   70.47    2.96
   7  -3 -11   11.45    1.17
   7   3 -11   13.79    1.26
   6  -3 -11   54.27    2.36
   6   3 -11   53.16    2.18
   5  -3 -11   44.62    2.12
   5   3 -11   42.48    1.79
   4  -3 -11    8.97    1.02
   4   3 -11    6.21    0.68
   3  -3 -11   48.46    2.06
   3   3 -11   46.46    1.77
   2  -3 -11    1.92    0.80
   2  -3 -11    2.49    0.93
   2   3 -11    2.04    0.45
   2   3 -11    2.12    0.44
   1  -3 -11   58.70    2.38
   1  -3 -11   56.73    2.42
   1   3 -11   58.69    2.03
   1   3 -11   61.77    2.03
   0  -3 -11   14.70    1.27
   0  -3 -11   15.99    1.22
   0   3 -11   15.59    0.73
   0   3 -11   15.24    0.72
  -1  -3 -11    5.37    0.92
  -1  -3 -11    4.29    0.75
  -1   3 -11    5.50    0.47
  -2  -3 -11   17.50    1.43
  -2  -3 -11   16.16    1.34
  -2   3 -11   16.41    0.76
  -3  -3 -11    0.40    0.79
  -3  -3 -11    0.63    0.69
  -3   3 -11    0.16    0.36
  -4  -3 -11   43.01    2.07
  -4  -3 -11   44.06    2.06
  -4   3 -11   42.27    1.62
  -5  -3 -11    3.57    1.00
  -5  -3 -11    2.49    0.92
  -5   3 -11    3.87    0.58
  -6  -3 -11    3.76    1.23
  -6  -3 -11    2.15    0.94
  -6   3 -11    4.02    0.64
  -7  -3 -11    4.81    1.03
  -7   3 -11    4.59    0.72
  -8  -3 -11   32.69    1.90
  -8   3 -11   30.50    1.63
  -9  -3 -11    7.68    1.23
  -9   3 -11    5.42    0.94
 -10  -3 -11   12.66    1.39
 -10   3 -11   14.77    1.51
 -11  -3 -11    8.95    1.35
 -11   3 -11    8.14    1.21
 -12  -3 -11   -0.50    1.27
 -12   3 -11    3.01    1.17
  16  -4 -11    0.64    1.43
  16   4 -11    0.58    1.31
  15  -4 -11    3.91    1.46
  15   4 -11    3.39    1.33
  14  -4 -11    0.98    1.29
  14   4 -11    6.72    1.29
  13  -4 -11    5.65    1.40
 -13   4  11    5.36    1.23
  12  -4 -11    0.87    1.15
 -12   4  11    2.49    1.03
  11  -4 -11    4.57    1.23
 -11   4  11    3.33    1.05
  10  -4 -11    4.10    1.12
 -10   4  11    3.90    1.06
   9  -4 -11   -1.45    0.96
  -9   4  11    0.27    0.80
   9   4 -11   -0.68    1.03
   8  -4 -11    5.68    1.11
   8   4 -11    6.42    0.98
   7  -4 -11   -0.12    0.90
   7   4 -11    1.65    0.77
   6  -4 -11    6.26    1.03
   6   4 -11    5.63    0.82
  -6   4  11    7.05    1.03
   5  -4 -11   15.59    1.40
   5   4 -11   15.53    1.08
   4  -4 -11   36.48    1.86
   4   4 -11   35.97    1.56
   3  -4 -11    2.18    0.88
   3   4 -11    2.29    0.50
   2  -4 -11    5.29    0.89
   2   4 -11    4.70    0.48
   1  -4 -11    2.34    0.78
   1   4 -11    1.36    0.33
   0  -4 -11    0.69    0.83
   0   4 -11    1.03    0.24
  -1  -4 -11    6.26    0.94
  -1   4 -11    5.82    0.31
  -2  -4 -11   -0.22    0.81
  -2   4 -11    0.40    0.22
  -3  -4 -11    3.08    0.84
  -3   4 -11    2.36    0.34
  -4  -4 -11    1.14    0.81
  -4   4 -11    0.87    0.40
  -5  -4 -11    1.11    0.91
  -5   4 -11   -0.42    0.46
  -6  -4 -11    0.21    0.96
  -6   4 -11   -0.69    0.53
  -7  -4 -11    4.06    1.00
  -7   4 -11    1.59    0.65
  -8  -4 -11    0.74    1.03
  -8   4 -11    1.07    0.72
  -9  -4 -11    3.39    1.14
  -9   4 -11    3.34    0.86
 -10  -4 -11   -0.08    1.06
 -10   4 -11    1.32    0.89
 -11  -4 -11    0.98    1.34
 -11   4 -11    1.27    1.04
  15  -5 -11   11.85    1.70
  14  -5 -11    6.96    1.48
  13  -5 -11    0.15    1.21
 -13   5  11    1.45    1.25
  12  -5 -11   11.67    1.54
 -12   5  11    9.10    1.39
  11  -5 -11    3.99    1.22
 -11   5  11    1.24    1.05
  10  -5 -11   29.21    2.11
  10   5 -11   29.21    2.04
 -10   5  11   28.70    1.99
   9  -5 -11   -2.00    1.02
   9   5 -11    2.10    1.02
  -9   5  11   -0.46    0.89
   8  -5 -11   42.93    2.25
  -8   5  11   37.68    2.01
   8   5 -11   39.42    2.03
   7  -5 -11   -0.54    0.98
  -7   5  11    2.53    0.83
   7   5 -11   -0.01    0.74
   6  -5 -11   28.85    1.84
   6   5 -11   29.13    1.51
   5  -5 -11    7.57    1.10
   5   5 -11    7.37    0.79
   4  -5 -11    1.54    0.91
  -4   5  11    1.85    0.95
   4   5 -11    3.02    0.60
   3  -5 -11   94.53    3.52
   3   5 -11   89.14    3.10
   2  -5 -11   14.03    1.39
   2   5 -11   16.15    0.84
   1  -5 -11   25.65    1.66
   1   5 -11   29.31    1.06
   0  -5 -11    2.09    0.84
  -1  -5 -11   22.96    1.57
  -2  -5 -11    1.73    0.87
  -3  -5 -11    8.69    1.16
  -3   5 -11    8.03    0.49
  -4  -5 -11    4.46    1.00
  -4   5 -11    5.89    0.60
  -5  -5 -11    0.33    0.90
  -5   5 -11   -0.13    0.47
  -6  -5 -11   10.04    1.30
  -6   5 -11    8.94    0.91
  -7  -5 -11   -0.80    0.94
  -7   5 -11   -0.97    0.61
  -8  -5 -11   11.32    1.35
  -8   5 -11   14.30    1.25
  -9  -5 -11   -0.98    1.17
  -9   5 -11    0.58    0.78
 -10  -5 -11   26.80    2.11
 -10   5 -11   26.07    1.76
 -11  -5 -11    9.16    1.49
 -11   5 -11    7.61    1.16
  15  -6 -11    2.40    1.63
  14  -6 -11    1.55    1.33
  13  -6 -11   -0.82    1.31
 -13   6  11    2.30    1.37
  12  -6 -11    0.04    1.22
 -12   6  11    2.24    1.32
  11  -6 -11    1.72    1.24
  10  -6 -11    0.41    1.13
 -10   6  11    2.49    1.07
  10   6 -11    0.06    1.06
   9  -6 -11    0.35    1.11
   9   6 -11    0.66    0.94
  -9   6  11    0.12    1.00
   8  -6 -11   11.26    1.37
  -8   6  11   10.00    1.21
   8   6 -11   10.37    1.14
   7  -6 -11   -0.30    0.98
   7   6 -11   -0.39    0.81
  -7   6  11   -0.56    0.89
   6  -6 -11   18.57    1.71
   6   6 -11   20.25    1.33
  -6   6  11   19.50    1.50
   5  -6 -11    6.35    1.21
  -5   6  11    2.55    0.93
   5   6 -11    4.27    0.74
   4  -6 -11   27.25    1.82
   4   6 -11   26.58    1.36
   3  -6 -11    1.13    0.95
   3   6 -11    0.85    0.53
   2  -6 -11   -0.56    0.88
   2   6 -11    0.36    0.41
   1  -6 -11   13.32    1.31
   1   6 -11   10.67    0.65
   0  -6 -11    1.65    0.93
   0   6 -11    1.49    0.24
  -1  -6 -11    3.49    0.95
  -2  -6 -11    0.03    0.90
  -3  -6 -11    3.10    0.96
  -3   6 -11    3.08    0.32
  -3   6 -11    3.34    0.32
  -4  -6 -11   -0.26    0.90
  -4   6 -11   -0.02    0.36
  -5  -6 -11    5.20    1.08
  -5   6 -11    5.00    0.57
  -6  -6 -11    1.53    1.02
  -6   6 -11    0.27    0.56
  -7  -6 -11    1.90    1.05
  -7   6 -11    2.13    0.68
  -8  -6 -11    7.73    1.28
  -8   6 -11    5.74    0.86
  -9  -6 -11    1.53    1.32
  -9   6 -11    1.97    0.86
 -10  -6 -11   -0.69    1.36
 -10   6 -11    0.42    0.93
  14  -7 -11    1.22    1.40
  13  -7 -11    0.12    1.22
  12  -7 -11    6.66    1.46
 -12   7  11    6.46    1.57
  11  -7 -11   -0.67    1.27
 -11   7  11    2.26    1.43
  10  -7 -11   15.23    1.65
 -10   7  11   14.56    1.54
   9  -7 -11    2.06    1.23
   9   7 -11    2.35    1.15
  -9   7  11   -3.23    1.02
   8  -7 -11   22.64    1.99
  -8   7  11   27.03    1.87
   8   7 -11   23.42    1.72
   7  -7 -11    2.54    1.17
   7   7 -11    1.96    0.90
  -7   7  11   -1.72    0.97
   6  -7 -11   53.10    2.59
  -6   7  11   49.25    2.38
   6   7 -11   47.86    2.17
   5  -7 -11   25.05    1.94
  -5   7  11   29.41    1.76
   5   7 -11   27.04    1.51
   4  -7 -11   32.84    2.06
   4   7 -11   31.92    1.60
  -4   7  11   38.32    2.05
   3  -7 -11   22.97    1.82
   3   7 -11   25.62    1.28
  -3   7  11   24.37    1.61
   2  -7 -11    4.31    1.09
   2   7 -11    3.96    0.53
   1  -7 -11   27.63    1.86
   1   7 -11   27.02    1.12
   0  -7 -11   12.65    1.29
   0   7 -11   11.38    0.64
  -1  -7 -11   22.68    1.74
  -1   7 -11   21.62    0.84
  -1   7 -11   21.55    0.84
  -2  -7 -11   26.30    1.87
  -2   7 -11   26.61    1.01
  -2   7 -11   27.72    1.00
  -3  -7 -11    0.27    1.00
  -3   7 -11    0.75    0.32
  -3   7 -11    0.75    0.35
  -4  -7 -11   17.74    1.86
  -4   7 -11   15.69    0.87
  -4   7 -11   15.84    0.89
  -5  -7 -11    2.58    1.07
  -5   7 -11    0.95    0.51
  -6  -7 -11   36.95    2.26
  -6   7 -11   37.36    1.61
  -7  -7 -11   -0.05    1.11
  -7   7 -11    1.22    0.69
  -8  -7 -11   12.32    1.48
  -8   7 -11   12.03    1.24
  -9  -7 -11    2.62    1.44
  -9   7 -11    2.64    0.91
  13  -8 -11    0.58    1.37
  12  -8 -11   -0.37    1.25
 -12   8  11    1.35    1.37
  11  -8 -11    9.90    1.48
 -11   8  11    8.11    1.63
  10  -8 -11    0.99    1.25
 -10   8  11    1.66    1.35
   9  -8 -11    2.30    1.30
  -9   8  11    4.24    1.29
   8  -8 -11    1.59    1.26
   8   8 -11    0.16    1.04
  -8   8  11    0.89    1.17
   7  -8 -11   13.99    1.57
  -7   8  11   14.60    1.47
   7   8 -11   16.05    1.56
   6  -8 -11   -1.06    1.07
   6   8 -11   -0.75    0.87
  -6   8  11    1.53    1.18
   5  -8 -11   20.44    1.95
  -5   8  11   23.33    1.95
   5   8 -11   25.64    1.55
   4  -8 -11    7.81    1.25
   4   8 -11    7.78    0.89
  -4   8  11    6.21    1.14
   3  -8 -11    6.16    1.23
   3   8 -11    6.43    0.79
  -3   8  11    5.58    1.08
   2  -8 -11    7.64    1.26
   2   8 -11    8.71    0.97
   1  -8 -11    1.77    1.08
   1   8 -11    3.42    0.53
   0  -8 -11    8.84    1.28
   0   8 -11    8.93    0.73
  -1  -8 -11    0.08    1.07
  -1   8 -11    0.98    0.40
  -1   8 -11    0.85    0.39
  -2  -8 -11    0.29    1.05
  -2   8 -11    1.17    0.42
  -2   8 -11    0.75    0.41
  -3  -8 -11   -0.61    1.02
  -3   8 -11    0.69    0.44
  -3   8 -11    0.20    0.42
  -4  -8 -11    5.15    1.22
  -4   8 -11    4.89    0.58
  -4   8 -11    5.38    0.60
  -5  -8 -11    0.66    1.11
  -5   8 -11    1.17    0.60
  -5   8 -11    0.93    0.54
  -6  -8 -11    4.40    1.36
  -6   8 -11    3.84    0.69
  -7  -8 -11   -0.82    1.29
  -7   8 -11    0.55    0.70
  -8  -8 -11    0.30    1.38
  -8   8 -11    3.17    0.84
  -9  -8 -11    2.01    1.46
  -9   8 -11   -1.64    0.87
  12  -9 -11    5.80    1.57
  11  -9 -11    1.84    1.40
 -11   9  11    4.64    1.66
  10  -9 -11   10.51    1.52
 -10   9  11    8.72    1.67
   9  -9 -11    1.49    1.21
  -9   9  11   -0.38    1.49
   8  -9 -11   31.82    2.30
  -8   9  11   30.12    2.31
   7  -9 -11   14.39    1.70
  -7   9  11   12.92    1.65
   7   9 -11   14.52    1.39
   6  -9 -11   10.03    1.45
  -6   9  11   10.26    1.36
   6   9 -11    6.01    1.12
   5  -9 -11   15.43    1.60
  -5   9  11   16.49    1.78
   5   9 -11   14.25    1.50
   4  -9 -11    7.38    1.30
  -4   9  11    6.40    1.21
   4   9 -11    5.41    0.94
   3  -9 -11   37.03    2.33
   3   9 -11   38.29    1.81
  -3   9  11   38.64    2.35
   2  -9 -11   -0.93    1.08
   2   9 -11    0.03    0.68
   1  -9 -11   32.84    2.33
   1   9 -11   30.19    1.46
   0  -9 -11   20.65    1.92
   0   9 -11   22.88    1.18
  -1  -9 -11   39.62    2.30
  -1   9 -11   33.29    1.45
  -1   9 -11   36.83    1.51
  -2  -9 -11   26.16    2.02
  -2   9 -11   23.73    1.19
  -2   9 -11   23.64    1.15
  -3  -9 -11    7.66    1.39
  -3   9 -11    9.68    0.91
  -3   9 -11   10.34    0.87
  -4  -9 -11   29.60    2.21
  -4   9 -11   29.55    1.38
  -4   9 -11   31.32    1.42
  -5  -9 -11   10.12    1.46
  -5   9 -11    9.60    1.00
  -5   9 -11    9.05    0.84
  -6  -9 -11    7.76    1.44
  -6   9 -11    6.70    0.80
  -6   9 -11    7.28    0.89
  -7  -9 -11    3.18    1.38
  -7   9 -11    4.77    0.83
  -8  -9 -11   12.18    1.68
  10 -10 -11   -0.89    1.32
 -10  10  11    2.13    1.61
   9 -10 -11    1.41    1.35
  -9  10  11   -0.89    1.69
   8 -10 -11   -0.56    1.16
  -8  10  11    0.95    1.49
   7 -10 -11    3.22    1.26
  -7  10  11   -0.27    1.49
   6 -10 -11   -0.46    1.24
   6  10 -11    1.35    1.08
  -6  10  11   -1.12    1.32
   5 -10 -11   -1.18    1.23
  -5  10  11    2.94    1.35
   5  10 -11    3.08    1.06
   4 -10 -11   -2.23    1.12
  -4  10  11   -0.01    1.22
   4  10 -11    0.76    0.89
   3 -10 -11   -2.19    1.14
   3  10 -11   -0.03    0.83
  -3  10  11    0.42    1.20
   2 -10 -11   14.84    1.57
   2  10 -11   14.84    1.36
   1 -10 -11    1.60    1.25
   1  10 -11   -0.12    0.69
   0 -10 -11    5.59    1.35
   0  10 -11    5.17    0.74
  -1 -10 -11    3.54    1.28
  -1  10 -11    3.97    0.70
  -1  10 -11    3.51    0.64
  -2 -10 -11    1.62    1.23
  -2  10 -11    1.61    0.61
  -2  10 -11    1.38    0.63
  -3 -10 -11    7.11    1.41
  -3  10 -11    6.86    0.76
  -3  10 -11    5.61    0.73
  -4 -10 -11    1.38    1.26
  -4  10 -11    0.10    0.63
  -4  10 -11    1.41    0.69
  -5 -10 -11    2.22    1.32
  -5  10 -11    1.01    0.76
  -5  10 -11    0.44    0.71
  -6 -10 -11    3.52    1.34
  -6  10 -11    1.87    0.85
  -6  10 -11   -1.11    0.75
   9 -11 -11    2.32    1.52
   8 -11 -11   41.21    2.72
  -8  11  11   46.86    2.89
   7 -11 -11    9.82    1.59
  -7  11  11    8.20    1.87
   6 -11 -11   29.49    2.29
  -6  11  11   28.45    2.53
   5 -11 -11   18.88    1.99
  -5  11  11   12.48    1.82
   4 -11 -11    2.05    1.30
   4  11 -11   -0.37    1.08
  -4  11  11   -0.89    1.56
   3 -11 -11   16.50    1.74
  -3  11  11   17.44    1.91
   3  11 -11   18.79    1.64
   2 -11 -11    1.88    1.35
   2  11 -11    3.90    1.00
   1 -11 -11    9.36    1.48
   1  11 -11    8.34    0.99
   0 -11 -11    0.32    1.26
   0  11 -11    0.36    0.79
  -1 -11 -11    2.85    1.33
  -1  11 -11    1.64    0.71
  -1  11 -11    0.30    0.77
  -2 -11 -11    2.52    1.43
  -2  11 -11    3.34    0.81
  -2  11 -11    3.50    0.76
  -3 -11 -11    1.30    1.33
  -3  11 -11    0.30    0.71
  -3  11 -11    0.54    0.75
  -4 -11 -11    3.71    1.38
  -4  11 -11    2.96    0.82
  -4  11 -11    1.79    0.79
   6 -12 -11    6.47    1.53
   5 -12 -11    2.23    1.44
   4 -12 -11    0.24    1.35
   3 -12 -11   -3.10    1.22
   2 -12 -11    0.91    1.29
   2  12 -11   -2.12    1.03
   1 -12 -11    0.43    1.33
   1  12 -11   -0.65    0.98
   0 -12 -11    0.39    1.29
   0  12 -11    0.01    0.96
  -1 -12 -11    3.02    1.38
  -1  12 -11    2.17    0.96
  -2 -12 -11    4.12    1.43
  -2  12 -11    3.38    0.95
  16   0 -12    2.33    1.44
  15   0 -12    4.34    1.41
  14   0 -12   36.12    2.39
  13   0 -12    3.13    1.18
  12   0 -12   40.59    2.30
  11   0 -12   36.81    2.11
  10   0 -12   15.89    1.72
   9   0 -12   27.51    1.73
   8   0 -12    8.96    1.04
   7   0 -12    1.92    0.77
   7   0 -12    2.48    0.88
   6   0 -12   16.23    1.33
   6   0 -12   15.60    1.40
   5   0 -12   65.51    2.59
   5   0 -12   66.73    2.60
   4   0 -12    4.66    0.78
   4   0 -12    3.23    0.72
   3   0 -12  226.24    7.36
   3   0 -12  222.91    7.35
   2   0 -12   61.17    2.34
   2   0 -12   60.65    2.31
   1   0 -12   83.53    2.98
   1   0 -12   85.22    3.01
   0   0 -12  119.27    4.04
   0   0 -12  118.47    4.03
  -1   0 -12    2.11    0.60
  -1   0 -12    1.03    0.64
  -2   0 -12  209.52    6.95
  -2   0 -12  215.84    6.96
  -3   0 -12   19.44    1.24
  -3   0 -12   20.91    1.25
  -4   0 -12   47.25    1.98
  -5   0 -12   41.06    1.87
  -6   0 -12   29.33    1.57
  -7   0 -12   18.31    1.39
  -8   0 -12    0.97    0.84
  -9   0 -12    0.30    0.89
 -10   0 -12    8.14    1.22
 -11   0 -12    9.07    1.30
  16  -1 -12    1.23    1.38
  16   1 -12    0.39    1.32
  15  -1 -12    3.49    1.38
  15   1 -12    1.17    1.29
  14  -1 -12   -0.21    1.25
  14   1 -12    1.75    1.32
  13  -1 -12    0.44    1.15
  13   1 -12    0.54    1.14
  12  -1 -12    1.37    1.11
  12   1 -12    2.10    1.10
  11  -1 -12    0.30    1.01
  11   1 -12    0.61    0.99
  10  -1 -12    6.29    1.12
  10   1 -12    5.84    1.17
   9  -1 -12    4.96    1.02
   9   1 -12    4.03    0.95
   8  -1 -12   12.46    1.24
   8   1 -12   11.98    1.19
   8   1 -12   11.67    1.26
   7  -1 -12   -0.03    0.84
   7   1 -12   -0.19    0.77
   7   1 -12    0.46    0.76
   6  -1 -12   13.32    1.36
   6  -1 -12   14.21    1.33
   6   1 -12   14.85    1.27
   6   1 -12   12.59    1.26
   5  -1 -12   23.58    1.57
   5  -1 -12   24.73    1.51
   5   1 -12   23.18    1.36
   5   1 -12   23.61    1.40
   4  -1 -12    2.09    0.72
   4  -1 -12    2.49    0.75
   4   1 -12    2.21    0.66
   4   1 -12    2.36    0.68
   3  -1 -12    1.31    0.66
   3  -1 -12    1.56    0.72
   3   1 -12    0.46    0.57
   3   1 -12    1.24    0.63
   2  -1 -12   29.41    1.48
   2  -1 -12   27.02    1.50
   2   1 -12   29.82    1.39
   2   1 -12   29.38    1.35
   1  -1 -12    9.99    1.03
   1  -1 -12    9.37    1.00
   1   1 -12    7.76    0.87
   1   1 -12    8.77    0.84
   0  -1 -12    2.52    0.67
   0  -1 -12    2.94    0.68
   0   1 -12    3.33    0.58
   0   1 -12    2.12    0.52
  -1  -1 -12    4.14    0.70
  -1  -1 -12    4.31    0.76
  -1   1 -12    4.07    0.57
  -1   1 -12    3.50    0.61
  -2  -1 -12   21.01    1.31
  -2  -1 -12   20.24    1.29
  -2   1 -12   18.98    1.13
  -2   1 -12   21.27    1.12
  -3  -1 -12    7.82    0.91
  -3  -1 -12    7.38    0.84
  -3   1 -12    8.85    0.88
  -4  -1 -12    6.78    0.90
  -4  -1 -12    6.44    0.82
  -4   1 -12    5.28    0.69
  -5  -1 -12    0.41    0.69
  -5   1 -12   -0.02    0.62
  -6  -1 -12    4.38    0.87
  -6   1 -12    4.02    0.74
  -7  -1 -12    1.51    0.84
  -7   1 -12    0.58    0.75
  -8  -1 -12   -0.26    0.88
  -8   1 -12   -0.31    0.78
  -9  -1 -12   -0.62    0.97
  -9   1 -12    0.18    0.87
 -10  -1 -12    2.42    0.98
 -10   1 -12    2.07    0.97
 -11  -1 -12    8.20    1.34
 -11   1 -12    7.70    1.25
  16  -2 -12   33.15    2.50
  16   2 -12   31.52    2.44
  15  -2 -12    1.43    1.33
  15   2 -12   -0.01    1.29
  14  -2 -12   38.91    2.49
  14   2 -12   34.57    2.35
  13  -2 -12   -0.96    1.21
  13   2 -12   -0.98    1.06
  12  -2 -12   33.42    2.21
  12   2 -12   34.74    2.25
  11  -2 -12   14.37    1.52
  11   2 -12   13.45    1.34
  10  -2 -12   27.90    1.90
  10   2 -12   24.01    1.69
   9  -2 -12    9.92    1.29
   9   2 -12   10.68    1.14
   9   2 -12   11.81    1.36
   8  -2 -12    0.33    0.85
   8   2 -12    0.03    0.79
   8   2 -12    0.29    0.99
   7  -2 -12   26.84    1.80
   7   2 -12   25.27    1.46
   7   2 -12   27.07    1.51
   6  -2 -12    1.54    0.81
   6   2 -12    0.94    0.71
   6   2 -12    1.12    0.72
   5  -2 -12   37.64    1.92
   5  -2 -12   34.46    2.03
   5   2 -12   36.50    1.68
   5   2 -12   37.29    1.67
   4  -2 -12    1.32    0.80
   4  -2 -12    2.16    0.81
   4   2 -12    1.08    0.61
   4   2 -12    1.60    0.65
   3  -2 -12   93.87    3.51
   3  -2 -12   94.58    3.45
   3   2 -12   96.14    3.30
   3   2 -12   97.27    3.31
   2  -2 -12   22.30    1.41
   2  -2 -12   22.23    1.37
   2   2 -12   25.22    1.20
   2   2 -12   22.70    1.15
   1  -2 -12   90.84    3.27
   1  -2 -12   89.92    3.31
   1   2 -12   89.40    3.07
   1   2 -12   91.44    3.09
   0  -2 -12   53.08    2.22
   0  -2 -12   55.52    2.23
   0   2 -12   53.39    1.93
   0   2 -12   51.99    1.94
  -1  -2 -12   15.90    1.32
  -1  -2 -12   19.44    1.27
  -1   2 -12   16.33    0.95
  -1   2 -12   17.14    0.91
  -2  -2 -12   37.60    1.79
  -2  -2 -12   38.31    1.86
  -2   2 -12   38.72    1.50
  -3  -2 -12   -0.13    0.71
  -3  -2 -12    0.75    0.79
  -3   2 -12   -0.71    0.45
  -4  -2 -12   11.90    1.26
  -4  -2 -12   13.51    1.20
  -4   2 -12   12.43    0.96
  -5  -2 -12   -1.35    0.93
  -5  -2 -12    0.73    0.80
  -5   2 -12    0.29    0.56
  -6  -2 -12   -0.45    0.71
  -6   2 -12   -0.39    0.59
  -7  -2 -12    1.68    0.82
  -7   2 -12   -0.83    0.67
  -8  -2 -12    1.31    0.99
  -8   2 -12    2.65    0.81
  -9  -2 -12   13.13    1.41
  -9   2 -12   13.42    1.36
 -10  -2 -12    1.54    1.10
 -10   2 -12    3.15    1.03
 -11  -2 -12   12.64    1.44
 -11   2 -12   13.21    1.39
  15  -3 -12   -0.38    1.26
  15   3 -12    1.58    1.26
  14  -3 -12   -2.26    1.18
  14   3 -12   -1.30    1.12
  13  -3 -12    1.25    1.32
  13   3 -12    2.47    1.22
  12  -3 -12    1.90    1.17
  12   3 -12    2.10    1.05
  11  -3 -12    1.84    1.17
  11   3 -12    3.17    1.07
  10  -3 -12    1.64    1.08
 -10   3  12    2.87    1.15
  10   3 -12    0.87    0.88
   9  -3 -12    2.62    1.05
   9   3 -12    5.16    1.18
   9   3 -12    3.05    0.93
   8  -3 -12    1.17    0.94
   8   3 -12    0.90    0.85
   8   3 -12    0.30    0.93
   7  -3 -12    3.57    0.96
   7   3 -12    3.53    0.83
   7   3 -12    4.74    0.89
   6  -3 -12    6.37    1.00
   6   3 -12    4.48    0.79
   6   3 -12    6.00    0.85
   5  -3 -12   25.11    1.73
   5   3 -12   24.37    1.38
   5   3 -12   25.89    1.36
   4  -3 -12    5.44    0.98
   4   3 -12    5.10    0.67
   4   3 -12    3.98    0.66
   3  -3 -12    6.56    0.90
   3  -3 -12    8.31    1.09
   3   3 -12    7.24    0.68
   3   3 -12    6.78    0.66
   2  -3 -12   11.97    1.30
   2  -3 -12   13.57    1.33
   2   3 -12   11.52    0.84
   2   3 -12   11.05    0.84
   1  -3 -12    8.79    0.98
   1  -3 -12   10.98    1.21
   1   3 -12    9.12    0.71
   1   3 -12   10.64    0.73
   0  -3 -12   -0.26    0.85
   0  -3 -12    0.43    0.77
   0   3 -12    0.82    0.40
   0   3 -12    0.37    0.36
  -1  -3 -12    3.46    0.86
  -1  -3 -12    3.20    0.92
  -1   3 -12    3.32    0.42
  -1   3 -12    2.52    0.40
  -2  -3 -12    1.36    0.73
  -2  -3 -12    1.52    0.85
  -2   3 -12    1.13    0.38
  -3  -3 -12    0.01    0.77
  -3  -3 -12   -0.16    0.96
  -3   3 -12    0.46    0.41
  -4  -3 -12   20.23    1.54
  -4  -3 -12   19.58    1.74
  -4   3 -12   18.67    1.03
  -5  -3 -12    5.21    1.03
  -5  -3 -12    7.33    1.26
  -5   3 -12    5.24    0.65
  -6  -3 -12    2.42    1.12
  -6  -3 -12    2.30    0.98
  -6   3 -12    3.11    0.67
  -7  -3 -12    5.65    1.09
  -7   3 -12    6.73    0.82
  -8  -3 -12    1.04    0.94
  -8   3 -12    2.46    0.78
  -9  -3 -12    0.80    1.12
  -9   3 -12   -0.53    0.77
 -10  -3 -12    1.83    1.12
 -10   3 -12    2.32    0.97
 -11  -3 -12   -0.58    1.18
 -11   3 -12    0.89    1.03
  15  -4 -12    7.03    1.55
  15   4 -12    8.14    1.47
  14  -4 -12   22.35    2.23
  14   4 -12   23.62    2.05
  13  -4 -12    1.30    1.26
  13   4 -12   -1.16    1.17
  12  -4 -12   54.52    2.86
  11  -4 -12    8.81    1.35
 -11   4  12    6.33    1.13
  10  -4 -12    6.68    1.27
  10   4 -12    7.35    1.24
   9  -4 -12    4.02    1.16
   9   4 -12    5.07    1.15
   8  -4 -12    9.54    1.26
   8   4 -12   11.08    1.14
  -8   4  12   11.50    1.62
   7  -4 -12   23.30    1.74
   7   4 -12   24.21    1.58
   6  -4 -12    1.16    1.00
   6   4 -12    0.65    0.72
   5  -4 -12   30.04    1.81
   5   4 -12   31.22    1.53
   4  -4 -12    2.07    0.88
   4   4 -12    1.24    0.60
   3  -4 -12    7.18    0.98
   3   4 -12    5.32    0.61
   2  -4 -12    7.21    1.00
   2   4 -12    6.68    0.70
   1  -4 -12    8.18    0.98
   1   4 -12   10.29    0.67
   1   4 -12    8.49    0.64
   0  -4 -12   27.05    1.65
   0   4 -12   30.29    1.09
   0   4 -12   29.39    1.08
  -1  -4 -12    1.80    0.81
  -1   4 -12    1.93    0.29
  -2  -4 -12   18.16    1.42
  -2   4 -12   18.62    0.77
  -3  -4 -12    0.87    0.82
  -3   4 -12    1.75    0.37
  -4  -4 -12    6.55    0.99
  -4   4 -12    8.74    0.71
  -5  -4 -12    4.97    1.04
  -5   4 -12    5.14    0.60
  -6  -4 -12   16.10    1.65
  -6   4 -12   17.83    1.11
  -7  -4 -12   10.71    1.28
  -7   4 -12   13.08    1.14
  -8  -4 -12    7.94    1.31
  -8   4 -12    7.26    0.90
  -9  -4 -12   24.87    1.96
  -9   4 -12   24.48    1.61
 -10  -4 -12    3.59    1.24
 -10   4 -12    2.09    0.98
  14  -5 -12    1.86    1.42
  13  -5 -12   -0.83    1.35
  12  -5 -12    2.95    1.46
  11  -5 -12    1.36    1.25
 -11   5  12    0.29    1.00
  10  -5 -12   12.47    1.46
  10   5 -12   11.28    1.35
 -10   5  12    7.87    1.17
   9  -5 -12   -1.14    1.16
   9   5 -12   -0.08    1.01
  -9   5  12   -0.76    0.96
   8  -5 -12    5.01    1.24
  -8   5  12    1.55    0.92
   8   5 -12    4.00    1.00
   7  -5 -12    8.23    1.21
   7   5 -12    6.91    0.98
   6  -5 -12    2.05    1.01
   6   5 -12    2.34    0.76
  -6   5  12    0.87    0.91
   5  -5 -12    6.62    1.10
   5   5 -12    7.10    0.82
   4  -5 -12    0.52    1.01
   4   5 -12    2.18    0.63
   3  -5 -12   10.67    1.26
   3   5 -12   10.61    0.92
   2  -5 -12   10.88    1.15
   2   5 -12   11.22    0.75
   1  -5 -12    2.34    0.91
   1   5 -12    2.59    0.38
   0  -5 -12   -0.35    0.82
   0   5 -12   -0.05    0.23
  -1  -5 -12    7.44    1.03
  -2  -5 -12    1.57    0.89
  -2   5 -12    3.01    0.29
  -3  -5 -12    0.63    0.98
  -3   5 -12    0.77    0.29
  -4  -5 -12   -1.04    0.87
  -4   5 -12    0.42    0.39
  -5  -5 -12    3.47    0.99
  -5   5 -12    4.74    0.58
  -6  -5 -12    0.80    1.07
  -6   5 -12   -0.21    0.57
  -7  -5 -12    0.84    0.98
  -7   5 -12    1.37    0.66
  -8  -5 -12   -0.38    1.03
  -8   5 -12    0.13    0.73
  -9  -5 -12    5.20    1.40
  -9   5 -12    5.04    0.94
 -10  -5 -12   -0.29    1.32
 -10   5 -12    0.19    0.94
  14  -6 -12   16.38    1.81
  13  -6 -12   -1.46    1.26
  12  -6 -12    6.48    1.46
  11  -6 -12    5.59    1.37
 -11   6  12    2.34    1.14
  10  -6 -12   11.32    1.49
 -10   6  12   11.74    1.31
   9  -6 -12   36.82    2.39
   9   6 -12   44.07    2.25
  -9   6  12   39.76    2.27
   8  -6 -12    7.22    1.31
   8   6 -12    9.09    1.15
  -8   6  12    8.47    1.11
   7  -6 -12   33.70    2.14
   7   6 -12   35.25    1.83
  -7   6  12   32.55    1.83
   6  -6 -12    2.78    1.17
   6   6 -12    2.23    0.81
  -6   6  12    1.02    0.79
   5  -6 -12   35.41    2.15
   5   6 -12   36.70    1.70
   4  -6 -12   26.09    1.86
   4   6 -12   27.94    1.38
  -4   6  12   23.20    2.45
   3  -6 -12   51.27    2.50
   3   6 -12   54.25    2.01
   2  -6 -12   22.78    1.69
   2   6 -12   19.10    0.98
   1  -6 -12   -0.31    0.90
   1   6 -12    0.56    0.33
   0  -6 -12   31.40    1.85
   0   6 -12   27.92    1.01
  -1  -6 -12   16.31    1.72
  -2  -6 -12   37.53    2.08
  -3  -6 -12    2.62    1.09
  -3   6 -12    4.46    0.43
  -4  -6 -12   17.01    1.65
  -4   6 -12   17.51    0.87
  -5  -6 -12    9.35    1.24
  -5   6 -12    8.19    0.81
  -6  -6 -12    5.62    1.29
  -6   6 -12    8.70    0.92
  -7  -6 -12   23.41    1.91
  -7   6 -12   24.41    1.39
  -8  -6 -12    4.00    1.21
  -8   6 -12    5.80    0.86
  -9  -6 -12   11.13    1.53
  -9   6 -12   13.75    1.36
  13  -7 -12    1.03    1.36
  12  -7 -12   -2.20    1.29
  11  -7 -12   -1.28    1.18
  10  -7 -12    6.86    1.41
 -10   7  12    5.90    1.34
   9  -7 -12    1.21    1.21
   9   7 -12    2.97    1.45
  -9   7  12    0.28    1.11
   8  -7 -12    6.03    1.33
   8   7 -12    4.90    1.09
  -8   7  12    4.51    1.12
   7  -7 -12    4.48    1.20
   7   7 -12    3.28    0.97
  -7   7  12    4.09    1.02
   6  -7 -12    3.28    1.19
  -6   7  12    2.57    0.99
   6   7 -12    2.89    0.88
   5  -7 -12   13.51    1.44
   5   7 -12   13.16    1.24
  -5   7  12   13.67    1.39
   4  -7 -12   10.70    1.38
   4   7 -12   13.86    1.16
   3  -7 -12    0.02    1.04
   3   7 -12    0.35    0.58
   2  -7 -12    4.43    1.21
   2   7 -12    4.22    0.55
   1  -7 -12    1.23    1.10
   1   7 -12   -0.05    0.38
   0  -7 -12   -0.68    0.96
   0   7 -12   -0.60    0.29
  -1  -7 -12    1.14    1.03
  -1   7 -12    1.37    0.24
  -1   7 -12    1.48    0.24
  -2  -7 -12    0.56    1.04
  -2   7 -12    0.28    0.23
  -2   7 -12    1.04    0.25
  -3  -7 -12    3.87    1.11
  -3   7 -12    2.97    0.36
  -3   7 -12    3.82    0.37
  -4  -7 -12   -0.67    1.14
  -4   7 -12    0.51    0.40
  -5  -7 -12    8.93    1.32
  -5   7 -12    8.85    0.81
  -6  -7 -12    2.83    1.16
  -6   7 -12    2.89    0.64
  -7  -7 -12    1.07    1.20
  -7   7 -12    0.20    0.66
  -8  -7 -12    0.81    1.21
  -8   7 -12   -0.17    0.78
  12  -8 -12    5.50    1.48
  11  -8 -12    2.32    1.40
  10  -8 -12    2.56    1.31
   9  -8 -12   19.91    2.02
  -9   8  12   12.84    1.53
   8  -8 -12   11.99    1.53
   8   8 -12   15.27    1.69
  -8   8  12   11.30    1.41
   7  -8 -12   29.66    2.24
  -7   8  12   28.43    2.25
   7   8 -12   34.15    1.92
   6  -8 -12    0.55    1.22
   6   8 -12    1.47    0.91
  -6   8  12    1.30    1.16
   5  -8 -12   39.53    2.37
   5   8 -12   38.89    1.89
  -5   8  12   35.42    2.24
   4  -8 -12   -0.22    1.13
  -4   8  12    0.99    1.07
   4   8 -12    2.87    0.77
   3  -8 -12   14.75    1.56
  -3   8  12   19.67    1.52
   3   8 -12   12.61    1.17
   2  -8 -12    3.84    1.16
   2   8 -12    4.69    0.65
   1  -8 -12   10.82    1.39
   1   8 -12   13.42    0.87
   0  -8 -12   16.04    1.77
   0   8 -12   16.52    0.86
  -1  -8 -12    1.21    1.13
  -1   8 -12   -0.01    0.35
  -1   8 -12   -0.44    0.35
  -2  -8 -12   23.05    1.93
  -2   8 -12   22.61    0.95
  -2   8 -12   22.46    0.95
  -3  -8 -12    0.30    1.11
  -3   8 -12    0.71    0.40
  -3   8 -12    0.44    0.40
  -4  -8 -12   28.05    2.09
  -4   8 -12   27.87    1.24
  -4   8 -12   27.87    1.20
  -5  -8 -12    2.89    1.20
  -5   8 -12    1.10    0.53
  -6  -8 -12   17.03    1.76
  -6   8 -12   15.69    1.13
  -7  -8 -12    0.88    1.38
  -7   8 -12    0.99    0.70
  11  -9 -12    9.49    1.71
  10  -9 -12    1.00    1.37
   9  -9 -12    1.83    1.35
   8  -9 -12   -1.65    1.20
   7  -9 -12   -1.12    1.24
   7   9 -12    0.80    1.12
  -7   9  12   -0.54    1.14
   6  -9 -12    0.20    1.22
   6   9 -12    0.64    1.01
  -6   9  12    0.60    1.18
   5  -9 -12   -1.67    1.17
   5   9 -12    0.70    0.91
  -5   9  12   -1.15    1.10
   4  -9 -12    2.98    1.29
   4   9 -12    3.48    0.90
  -4   9  12    1.61    1.12
   3  -9 -12   -1.40    1.11
   3   9 -12   -1.24    0.69
  -3   9  12    1.11    0.99
   2  -9 -12    6.61    1.37
   2   9 -12    7.61    0.80
   1  -9 -12    7.76    1.36
   1   9 -12   10.91    0.98
   0  -9 -12   -2.99    1.03
   0   9 -12   -0.12    0.52
  -1  -9 -12    0.14    1.16
  -1   9 -12   -0.26    0.42
  -1   9 -12   -0.58    0.48
  -2  -9 -12   -1.62    1.13
  -2   9 -12    0.39    0.43
  -2   9 -12    0.87    0.47
  -3  -9 -12    2.80    1.27
  -3   9 -12    2.00    0.51
  -3   9 -12    1.10    0.50
  -4  -9 -12    0.13    1.24
  -4   9 -12    0.62    0.53
  -4   9 -12    0.26    0.54
  -5  -9 -12    0.88    1.26
  -5   9 -12    1.67    0.64
  -5   9 -12    1.23    0.61
  -6  -9 -12    7.64    1.46
  -6   9 -12    7.94    0.82
   9 -10 -12    6.41    1.58
   8 -10 -12    5.30    1.45
   7 -10 -12   43.47    2.70
   6 -10 -12   -0.22    1.27
   6  10 -12    1.42    1.23
   5 -10 -12   56.58    2.93
   5  10 -12   52.84    2.55
   4 -10 -12    2.66    1.36
   4  10 -12    3.15    1.01
   3 -10 -12    9.64    1.52
   3  10 -12   10.14    1.04
   2 -10 -12   -0.77    1.34
   2  10 -12    1.06    0.77
   1 -10 -12   13.41    1.60
   1  10 -12   13.41    1.14
   0 -10 -12    1.13    1.27
   0  10 -12    0.77    0.62
  -1 -10 -12    6.84    1.43
  -1  10 -12    8.39    0.77
  -2 -10 -12    4.94    1.37
  -2  10 -12    7.25    0.71
  -2  10 -12    5.74    0.67
  -3 -10 -12    4.31    1.38
  -3  10 -12    3.24    0.63
  -3  10 -12    2.22    0.63
  -4 -10 -12    4.48    1.46
  -4  10 -12    6.77    0.75
  -4  10 -12    7.25    0.77
  -5 -10 -12    1.81    1.36
  -5  10 -12   -0.35    0.73
  -5  10 -12   -0.07    0.67
   7 -11 -12    1.03    1.44
   6 -11 -12    5.63    1.47
   5 -11 -12    3.66    1.43
   4 -11 -12    4.81    1.40
   4  11 -12   -1.09    1.05
   3 -11 -12    0.96    1.28
   3  11 -12    1.51    0.97
   2 -11 -12    0.00    1.35
   2  11 -12   -0.36    0.87
   1 -11 -12    0.27    1.27
   1  11 -12    0.33    0.79
   0 -11 -12    1.19    1.34
   0  11 -12    1.16    0.77
  -1 -11 -12    2.55    1.34
  -1  11 -12    2.34    0.76
  -2 -11 -12    6.04    1.52
  -2  11 -12    3.94    0.76
  -2  11 -12    3.56    0.76
  15   0 -13   -0.56    1.32
  14   0 -13   -1.58    1.19
  13   0 -13    1.50    1.33
  12   0 -13   -0.24    1.17
  11   0 -13   -1.42    1.09
  10   0 -13   -1.07    0.93
   9   0 -13    1.41    0.91
   8   0 -13   -0.48    0.81
   8   0 -13    0.15    1.08
   7   0 -13   -0.49    0.82
   7   0 -13    0.18    1.01
   6   0 -13   -1.06    0.68
   6   0 -13    0.21    0.89
   5   0 -13    0.17    0.76
   5   0 -13   -0.14    0.73
   4   0 -13   -1.25    0.74
   4   0 -13   -0.97    0.66
   3   0 -13    0.05    0.67
   3   0 -13   -0.33    0.64
   2   0 -13   -0.65    0.60
   2   0 -13   -0.57    0.65
   1   0 -13    0.17    0.65
   1   0 -13   -1.00    0.58
   0   0 -13   -0.89    0.65
   0   0 -13    0.23    0.58
  -1   0 -13   -0.51    0.59
  -1   0 -13    0.54    0.67
  -2   0 -13    0.26    0.60
  -2   0 -13   -0.90    0.65
  -3   0 -13   -0.51    0.71
  -3   0 -13   -0.81    0.59
  -4   0 -13   -0.28    0.66
  -4   0 -13   -1.15    0.73
  -5   0 -13   -0.70    0.69
  -6   0 -13    0.21    0.74
  -7   0 -13   -0.17    0.78
  -8   0 -13   -1.40    0.83
  -9   0 -13   -1.64    0.85
 -10   0 -13   -1.00    1.05
  15  -1 -13    2.57    1.43
  15   1 -13    4.51    1.40
  14  -1 -13   29.28    2.29
  14   1 -13   25.44    2.41
  13  -1 -13   40.02    2.44
  13   1 -13   39.23    2.39
  12  -1 -13   12.16    1.46
  12   1 -13   10.87    1.39
  11  -1 -13   42.22    2.32
  11   1 -13   39.44    2.23
  10  -1 -13    9.52    1.33
  10   1 -13    9.96    1.19
   9  -1 -13   47.83    2.34
   9   1 -13   49.04    2.36
   9   1 -13   42.63    2.63
   8  -1 -13   -0.39    0.85
   8   1 -13    0.71    0.80
   8   1 -13    0.14    1.04
   7  -1 -13   24.31    2.25
   7  -1 -13   22.56    1.56
   7   1 -13   21.97    1.67
   7   1 -13   23.67    1.59
   6  -1 -13    2.93    1.01
   6  -1 -13    2.42    0.81
   6   1 -13    2.25    0.79
   6   1 -13    2.21    0.86
   5  -1 -13    9.06    0.98
   5  -1 -13   13.40    1.19
   5   1 -13   10.78    1.20
   5   1 -13   11.08    1.21
   4  -1 -13   14.29    1.35
   4  -1 -13   14.07    1.18
   4   1 -13   15.95    1.22
   4   1 -13   15.05    1.18
   3  -1 -13   35.54    1.76
   3  -1 -13   32.92    1.72
   3   1 -13   35.52    1.57
   3   1 -13   33.06    1.59
   2  -1 -13   87.98    3.24
   2  -1 -13   87.44    3.23
   2   1 -13   90.84    3.15
   2   1 -13   86.93    3.13
   1  -1 -13    1.68    0.76
   1  -1 -13    1.92    0.68
   1   1 -13    0.60    0.62
   1   1 -13    1.23    0.57
   0  -1 -13   59.69    2.36
   0  -1 -13   56.38    2.32
   0   1 -13   61.20    2.21
   0   1 -13   57.53    2.22
  -1  -1 -13   11.06    0.99
  -1  -1 -13   10.99    1.09
  -1   1 -13   10.75    0.99
  -1   1 -13    9.79    0.96
  -2  -1 -13   21.19    1.39
  -2  -1 -13   21.05    1.32
  -2   1 -13   20.90    1.20
  -2   1 -13   21.39    1.27
  -3  -1 -13    4.73    0.87
  -3  -1 -13    4.54    0.79
  -3   1 -13    4.06    0.74
  -3   1 -13    3.88    0.66
  -4  -1 -13    0.01    0.86
  -4  -1 -13    1.81    0.76
  -4   1 -13    0.14    0.59
  -5  -1 -13    3.20    0.81
  -5  -1 -13    2.39    0.94
  -5   1 -13    2.66    0.70
  -6  -1 -13    1.28    0.80
  -6   1 -13    1.12    0.67
  -7  -1 -13    3.15    0.92
  -7   1 -13    3.01    0.84
  -8  -1 -13   -0.16    0.93
  -8   1 -13   -0.14    0.85
  -9  -1 -13    0.72    1.04
  -9   1 -13    0.93    0.94
 -10  -1 -13   -1.07    1.03
 -10   1 -13    1.10    1.02
  15  -2 -13    5.62    1.56
  15   2 -13    8.84    1.55
  14  -2 -13    4.03    1.42
  14   2 -13    4.02    1.45
  13  -2 -13    0.28    1.24
  13   2 -13    0.77    1.13
  12  -2 -13   -0.84    1.12
  12   2 -13    0.22    0.99
  11  -2 -13   -0.20    1.16
  11   2 -13   -0.83    1.08
  10  -2 -13    3.99    1.10
  10   2 -13    2.16    1.04
   9  -2 -13    0.06    0.94
   9   2 -13    1.43    1.06
   9   2 -13    1.51    0.96
   8  -2 -13    0.32    1.02
   8   2 -13    2.71    1.01
   8   2 -13    0.59    0.86
   7  -2 -13    3.97    0.96
   7   2 -13    4.92    0.91
   7   2 -13    4.71    0.97
   6  -2 -13   -0.84    0.79
   6   2 -13   -2.19    0.74
   6   2 -13    0.24    0.71
   5  -2 -13    1.46    1.05
   5  -2 -13    1.26    0.81
   5   2 -13    2.42    0.73
   5   2 -13    0.65    0.72
   4  -2 -13    6.29    1.05
   4  -2 -13    4.88    0.88
   4   2 -13    5.94    0.77
   4   2 -13    5.01    0.74
   3  -2 -13    3.12    0.86
   3  -2 -13    4.60    0.89
   3   2 -13    2.87    0.67
   3   2 -13    3.00    0.64
   2  -2 -13   15.61    1.43
   2  -2 -13   16.46    1.22
   2   2 -13   16.75    1.06
   2   2 -13   14.38    1.03
   1  -2 -13    3.22    0.86
   1  -2 -13    2.05    0.76
   1   2 -13    1.76    0.53
   1   2 -13    2.41    0.60
   0  -2 -13   21.06    1.41
   0  -2 -13   19.25    1.33
   0   2 -13   20.30    1.07
   0   2 -13   20.36    1.11
  -1  -2 -13    2.79    0.86
  -1  -2 -13    3.13    0.76
  -1   2 -13    2.92    0.54
  -1   2 -13    3.92    0.61
  -2  -2 -13   15.61    1.35
  -2  -2 -13   19.97    1.44
  -2   2 -13   17.43    1.11
  -2   2 -13   18.42    1.03
  -3  -2 -13    4.97    0.84
  -3  -2 -13    1.29    0.93
  -3   2 -13    3.98    0.60
  -4  -2 -13    8.35    1.03
  -4  -2 -13    7.02    1.09
  -4   2 -13   10.53    0.95
  -5  -2 -13    6.75    0.97
  -5  -2 -13    7.98    1.17
  -5   2 -13    8.15    0.79
  -6  -2 -13    7.80    1.23
  -6  -2 -13    4.50    0.91
  -6   2 -13    5.18    0.79
  -7  -2 -13    4.50    0.94
  -7   2 -13    3.32    0.80
  -8  -2 -13    0.33    0.98
  -8   2 -13    0.94    0.77
  -9  -2 -13    0.86    1.09
  -9   2 -13    0.54    0.85
 -10  -2 -13   -0.81    1.14
 -10   2 -13    0.15    0.98
  15  -3 -13   -0.79    1.36
  15   3 -13   -1.91    1.27
  14  -3 -13    5.27    1.47
  14   3 -13    4.78    1.42
  13  -3 -13    7.84    1.47
  13   3 -13    5.43    1.25
  12  -3 -13   -0.05    1.20
  12   3 -13    2.35    1.19
  11  -3 -13   30.38    2.25
  11   3 -13   38.59    2.08
  10  -3 -13    0.35    1.16
  10   3 -13    0.51    0.88
  10   3 -13    1.54    1.60
   9  -3 -13   17.45    1.71
   9   3 -13   17.67    1.58
   9   3 -13   18.87    1.77
   8  -3 -13   25.28    1.78
   8   3 -13   22.51    1.59
   8   3 -13   21.83    1.70
   7  -3 -13   51.24    2.46
   7   3 -13   45.97    2.18
   7   3 -13   45.02    2.10
   6  -3 -13   31.20    1.85
   6   3 -13   31.34    1.70
   6   3 -13   30.26    1.60
   5  -3 -13    3.82    1.01
   5   3 -13    3.54    0.76
   5   3 -13    2.69    0.70
   4  -3 -13   13.41    1.25
   4   3 -13   12.63    1.15
   4   3 -13   13.76    1.05
   3  -3 -13    0.65    0.77
   3  -3 -13    2.15    1.10
   3   3 -13    1.13    0.61
   3   3 -13    1.13    0.57
   2  -3 -13   23.41    1.78
   2  -3 -13   25.22    1.66
   2   3 -13   24.77    1.19
   2   3 -13   25.56    1.23
   1  -3 -13    0.92    0.74
   1  -3 -13    0.13    0.98
   1   3 -13    1.12    0.46
   1   3 -13    1.17    0.49
   0  -3 -13  100.50    3.70
   0  -3 -13   99.62    3.79
   0   3 -13  101.21    3.37
   0   3 -13  103.26    3.37
  -1  -3 -13   51.31    2.32
  -1  -3 -13   52.74    2.33
  -1   3 -13   53.79    1.91
  -1   3 -13   53.28    1.90
  -2  -3 -13   14.86    1.54
  -2  -3 -13   10.03    1.08
  -2   3 -13    9.53    0.76
  -2   3 -13    8.15    0.78
  -3  -3 -13   31.91    1.86
  -3  -3 -13   33.91    1.88
  -3   3 -13   33.73    1.38
  -4  -3 -13   22.78    1.64
  -4  -3 -13   22.30    1.68
  -4   3 -13   22.27    1.16
  -5  -3 -13   32.09    1.99
  -5  -3 -13   29.77    1.89
  -5   3 -13   32.50    1.46
  -6  -3 -13    2.91    1.02
  -6   3 -13    4.01    0.70
  -7  -3 -13   34.42    2.07
  -7   3 -13   31.72    1.63
  -8  -3 -13    3.81    1.07
  -8   3 -13    1.79    0.79
  -9  -3 -13   17.57    1.94
  -9   3 -13   13.35    1.48
 -10  -3 -13    5.13    1.39
 -10   3 -13    4.08    1.07
  14  -4 -13    8.28    1.60
  14   4 -13    6.34    1.52
  13  -4 -13   -0.85    1.22
  13   4 -13   -0.77    1.08
  12  -4 -13   -0.49    1.25
  12   4 -13   -0.28    1.00
  11  -4 -13    3.68    1.24
  11   4 -13    0.92    1.07
  10  -4 -13    4.26    1.25
  10   4 -13    5.48    1.09
   9  -4 -13    2.85    1.15
   9   4 -13    1.54    1.11
   8  -4 -13    0.97    1.03
   8   4 -13    0.56    0.90
   7  -4 -13    0.69    0.96
   7   4 -13    0.44    0.86
   6  -4 -13   -0.19    1.03
   6   4 -13    0.60    0.79
   5  -4 -13    2.22    0.97
   5   4 -13    3.71    0.77
   4  -4 -13    0.85    0.89
   4   4 -13   -0.31    0.56
   4   4 -13    0.23    0.65
   3  -4 -13    1.08    0.87
   3   4 -13    1.46    0.60
   3   4 -13    1.25    0.54
   2  -4 -13    7.72    1.13
   2   4 -13    8.76    0.81
   2   4 -13    7.64    0.76
   1  -4 -13   17.69    1.42
   1   4 -13   15.63    0.84
   1   4 -13   13.34    0.83
   0  -4 -13    4.38    0.98
   0   4 -13    4.84    0.44
   0   4 -13    5.07    0.57
  -1  -4 -13   -0.14    0.90
  -1  -4 -13    0.72    1.28
  -1   4 -13    0.82    0.33
  -1   4 -13    1.09    0.33
  -2  -4 -13    1.73    1.30
  -2  -4 -13    1.33    0.91
  -2   4 -13    3.16    0.39
  -3  -4 -13    2.24    0.87
  -3  -4 -13    3.01    1.42
  -3   4 -13    3.00    0.44
  -4  -4 -13    1.49    0.89
  -4   4 -13    1.85    0.48
  -5  -4 -13    1.12    1.00
  -5   4 -13    2.05    0.57
  -6  -4 -13    0.19    1.05
  -6   4 -13    1.76    0.63
  -7  -4 -13    1.49    0.99
  -7   4 -13    2.37    0.72
  -8  -4 -13    2.65    1.23
  -8   4 -13    3.29    0.86
  -9  -4 -13    3.27    1.22
  -9   4 -13    3.54    0.95
  14  -5 -13   27.18    2.69
  14   5 -13   32.76    2.45
  13  -5 -13   16.33    1.81
  12  -5 -13    7.93    1.52
  11  -5 -13   14.14    1.65
  10  -5 -13   -1.29    1.11
   9  -5 -13   28.38    2.11
   9   5 -13   32.27    2.00
   8  -5 -13    1.02    1.09
   8   5 -13    0.50    0.99
   7  -5 -13    2.63    1.20
   7   5 -13    3.04    0.93
   6  -5 -13    9.33    1.25
   6   5 -13    9.03    0.97
   5  -5 -13    3.49    1.12
   5   5 -13    2.71    0.78
   4  -5 -13   27.95    1.86
   4   5 -13   28.17    1.45
   3  -5 -13    0.38    0.89
   3   5 -13   -0.75    0.55
   2  -5 -13   19.66    1.76
   2   5 -13   19.88    1.00
   1  -5 -13    0.12    0.87
   1   5 -13    0.57    0.36
   0  -5 -13   27.44    1.79
   0   5 -13   28.11    1.07
   0   5 -13   30.60    1.07
  -1  -5 -13   -1.01    0.93
  -1   5 -13    0.21    0.24
  -1   5 -13    0.12    0.23
  -2  -5 -13   49.95    2.36
  -2   5 -13   48.74    1.65
  -3  -5 -13   25.15    1.72
  -3   5 -13   23.88    0.98
  -4  -5 -13    4.23    1.14
  -4   5 -13    2.48    0.46
  -5  -5 -13   23.47    1.77
  -5   5 -13   23.07    1.13
  -6  -5 -13   -0.29    1.10
  -6   5 -13    0.34    0.59
  -7  -5 -13   29.17    2.02
  -7   5 -13   28.54    1.51
  -8  -5 -13    6.70    1.29
  -8   5 -13    8.00    0.97
  -9  -5 -13   10.14    1.60
  -9   5 -13    7.59    1.04
  13  -6 -13   -0.44    1.33
  12  -6 -13    3.31    1.53
  11  -6 -13    0.89    1.29
  10  -6 -13    4.31    1.31
   9  -6 -13    2.11    1.23
   9   6 -13    3.08    1.34
   8  -6 -13    4.26    1.22
   8   6 -13    3.41    1.07
   7  -6 -13    3.37    1.19
   7   6 -13    4.20    0.96
   6  -6 -13    6.70    1.26
  -6   6  13    7.72    1.57
   6   6 -13    6.51    0.95
   5  -6 -13   -0.91    1.00
   5   6 -13    0.84    0.74
   4  -6 -13   21.88    1.76
   4   6 -13   18.54    1.30
   3  -6 -13   -0.80    0.95
   3   6 -13    0.08    0.56
   2  -6 -13   -0.37    0.95
   2   6 -13    0.52    0.45
   1  -6 -13    1.85    0.96
   1   6 -13    1.06    0.37
   0  -6 -13   12.85    1.38
   0   6 -13   12.32    0.58
  -1  -6 -13    0.30    0.97
  -2  -6 -13    1.73    1.01
  -3  -6 -13   -0.43    1.03
  -3   6 -13    0.31    0.29
  -4  -6 -13   -1.72    0.98
  -4   6 -13    0.35    0.39
  -5  -6 -13    0.57    1.13
  -5   6 -13    0.77    0.49
  -6  -6 -13   -1.63    1.14
  -6   6 -13    0.12    0.57
  -7  -6 -13    2.61    1.17
  -7   6 -13    1.42    0.68
  -8  -6 -13    3.15    1.27
  -8   6 -13    4.32    0.83
  12  -7 -13   12.92    1.71
  11  -7 -13   13.37    1.72
  10  -7 -13    1.32    1.30
   9  -7 -13   37.75    2.49
   8  -7 -13    2.56    1.25
   8   7 -13    1.66    1.04
   7  -7 -13   33.82    2.34
   7   7 -13   35.64    1.94
   6  -7 -13   31.06    2.16
   6   7 -13   29.24    1.76
   5  -7 -13   24.86    1.98
   5   7 -13   23.83    1.52
   4  -7 -13    4.58    1.21
   4   7 -13    5.98    0.83
   3  -7 -13   17.98    1.81
   3   7 -13   16.82    1.13
   2  -7 -13   29.32    1.98
   2   7 -13   24.53    1.20
   1  -7 -13    0.40    1.02
   1   7 -13    0.57    0.40
   0  -7 -13   21.52    1.83
   0   7 -13   21.23    0.86
  -1  -7 -13    8.99    1.30
  -2  -7 -13    9.96    1.33
  -3  -7 -13   11.61    1.49
  -3   7 -13   11.57    0.59
  -4  -7 -13   11.23    1.42
  -4   7 -13   13.98    0.76
  -5  -7 -13   33.90    2.22
  -5   7 -13   33.05    1.40
  -6  -7 -13    1.90    1.23
  -6   7 -13    1.36    0.60
  -7  -7 -13    5.59    1.39
  -7   7 -13    7.55    0.84
  11  -8 -13    6.21    1.50
  10  -8 -13    3.45    1.44
   9  -8 -13    2.76    1.43
   8  -8 -13   -0.59    1.30
   7  -8 -13    0.63    1.25
   7   8 -13    0.18    1.06
   6  -8 -13    0.34    1.18
   6   8 -13   -0.32    0.92
   5  -8 -13   -1.19    1.16
   5   8 -13    0.14    0.87
   4  -8 -13    0.58    1.20
   4   8 -13    0.50    0.76
   3  -8 -13    2.44    1.24
   3   8 -13    2.86    0.71
   2  -8 -13    5.25    1.37
   2   8 -13    2.86    0.61
   1  -8 -13   10.98    1.42
   1   8 -13   11.30    0.82
   0  -8 -13    0.46    1.13
   0   8 -13    0.02    0.37
  -1  -8 -13   -0.67    1.08
  -1   8 -13   -0.63    0.31
  -2  -8 -13    0.74    1.10
  -2   8 -13    1.75    0.31
  -2   8 -13    1.44    0.31
  -3  -8 -13    0.37    1.14
  -3   8 -13    0.94    0.38
  -3   8 -13    0.96    0.36
  -4  -8 -13    2.64    1.22
  -4   8 -13    1.49    0.45
  -5  -8 -13    1.63    1.36
  -5   8 -13    0.33    0.51
  -6  -8 -13    1.11    1.36
  -6   8 -13    1.04    0.60
   9  -9 -13   15.23    1.81
   8  -9 -13    2.15    1.39
   7  -9 -13   17.76    1.82
   6  -9 -13    5.58    1.39
   6   9 -13    3.52    1.14
   5  -9 -13   32.13    2.29
   5   9 -13   26.14    1.87
   4  -9 -13   10.25    1.54
   4   9 -13   12.12    1.32
   3  -9 -13    2.76    1.36
   3   9 -13    2.32    0.77
   2  -9 -13    7.15    1.43
   2   9 -13   10.55    1.06
   1  -9 -13    2.69    1.31
   1   9 -13    2.23    0.59
   0  -9 -13   11.10    1.55
   0   9 -13   15.75    0.91
  -1  -9 -13    1.18    1.37
  -1   9 -13   -0.23    0.44
  -2  -9 -13    8.47    1.48
  -2   9 -13    7.85    0.68
  -2   9 -13    8.37    0.70
  -3  -9 -13   22.48    2.14
  -3   9 -13   22.47    1.04
  -3   9 -13   22.31    1.06
  -4  -9 -13    1.93    1.34
  -4   9 -13    2.03    0.54
  -4   9 -13    2.57    0.55
  -5  -9 -13   12.45    1.61
  -5   9 -13   12.40    1.01
   8 -10 -13   -1.04    1.39
   7 -10 -13    1.49    1.40
   6 -10 -13   -2.04    1.27
   5 -10 -13   -1.39    1.41
   5  10 -13   -0.42    1.01
   4 -10 -13    1.94    1.31
   4  10 -13    3.62    0.98
   3 -10 -13    1.84    1.33
   3  10 -13    2.02    0.83
   2 -10 -13    1.38    1.32
   2  10 -13    3.37    0.80
   1 -10 -13    2.10    1.29
   1  10 -13    0.60    0.65
   0 -10 -13    2.45    1.34
   0  10 -13    0.84    0.59
  -1 -10 -13    1.53    1.31
  -1  10 -13    0.25    0.56
  -2 -10 -13   -0.71    1.26
  -2  10 -13    0.55    0.53
  -2  10 -13   -0.46    0.51
  -3 -10 -13    0.01    1.35
  -3  10 -13    1.27    0.56
  -3  10 -13    0.85    0.55
   4 -11 -13   31.83    2.68
   4  11 -13   23.34    2.17
   3 -11 -13    1.88    1.36
   3  11 -13   -0.54    0.93
   2 -11 -13    7.10    1.50
   2  11 -13    7.08    0.99
   1 -11 -13    5.18    1.45
   1  11 -13    2.42    0.81
  14   0 -14    2.53    1.32
  13   0 -14   47.56    2.84
  12   0 -14    6.70    1.28
  11   0 -14   16.91    1.72
  10   0 -14   12.19    1.32
   9   0 -14   46.42    2.39
   8   0 -14   37.28    2.34
   8   0 -14   43.37    2.20
   7   0 -14   18.28    1.58
   7   0 -14   18.31    1.56
   6   0 -14   29.73    1.87
   6   0 -14   31.04    1.76
   5   0 -14    7.99    1.02
   5   0 -14    5.81    0.92
   4   0 -14   15.97    1.29
   4   0 -14   14.75    1.35
   3   0 -14    1.49    0.72
   3   0 -14    2.45    0.79
   2   0 -14   45.39    1.99
   2   0 -14   48.19    2.02
   1   0 -14    5.83    0.79
   1   0 -14    5.96    0.86
   0   0 -14    6.83    0.81
   0   0 -14    8.17    0.89
  -1   0 -14   -0.27    0.61
  -1   0 -14   -0.29    0.72
  -2   0 -14    5.94    0.79
  -2   0 -14    6.82    0.88
  -3   0 -14    4.77    0.77
  -3   0 -14    4.67    0.88
  -4   0 -14   10.44    1.11
  -4   0 -14   12.16    1.14
  -5   0 -14   17.72    1.33
  -5   0 -14   16.51    1.53
  -6   0 -14    2.59    0.85
  -7   0 -14    1.19    0.86
  -8   0 -14    0.89    0.93
  -9   0 -14    2.02    1.09
  14  -1 -14   -0.53    1.26
  14   1 -14    2.45    1.39
  13  -1 -14    0.16    1.23
  13   1 -14   -0.37    1.29
  12  -1 -14    2.48    1.23
  12   1 -14    0.31    1.19
  11  -1 -14    5.24    1.23
  11   1 -14    5.99    1.29
  10  -1 -14    2.84    1.08
  10   1 -14    2.60    1.13
   9  -1 -14    0.15    1.05
   9   1 -14   -0.11    0.88
   9   1 -14    1.43    1.14
   8  -1 -14    1.10    0.88
   8   1 -14    4.01    1.12
   8   1 -14    0.75    0.91
   7  -1 -14   18.79    1.62
   7  -1 -14   19.63    1.95
   7   1 -14   16.50    1.50
   7   1 -14   17.24    1.62
   6  -1 -14    4.85    1.14
   6  -1 -14    4.08    0.97
   6   1 -14    4.72    0.89
   6   1 -14    6.24    1.03
   5  -1 -14    0.42    0.89
   5  -1 -14    3.07    0.98
   5   1 -14    3.17    0.80
   5   1 -14    2.62    0.84
   4  -1 -14    2.11    0.94
   4  -1 -14    2.64    0.86
   4   1 -14    2.14    0.78
   4   1 -14    2.91    0.75
   3  -1 -14    0.33    0.73
   3  -1 -14    1.65    0.84
   3   1 -14   -0.28    0.71
   3   1 -14    0.65    0.67
   2  -1 -14    1.80    0.84
   2  -1 -14    1.73    0.77
   2   1 -14    1.28    0.64
   2   1 -14    1.07    0.71
   1  -1 -14    3.42    0.87
   1  -1 -14    3.89    0.80
   1   1 -14    4.62    0.77
   1   1 -14    4.23    0.69
   0  -1 -14    0.50    0.77
   0  -1 -14    0.29    0.68
   0   1 -14   -0.42    0.65
   0   1 -14    0.36    0.58
  -1  -1 -14   -1.05    0.66
  -1  -1 -14   -0.24    0.78
  -1   1 -14   -0.09    0.58
  -1   1 -14   -1.04    0.67
  -2  -1 -14    0.66    0.71
  -2  -1 -14    1.83    0.86
  -2   1 -14   -0.17    0.60
  -2   1 -14    0.60    0.73
  -3  -1 -14   21.66    1.41
  -3  -1 -14   17.78    1.51
  -3   1 -14   19.81    1.25
  -3   1 -14   23.74    1.41
  -4  -1 -14    1.16    0.80
  -4  -1 -14    0.80    0.96
  -4   1 -14    2.64    0.70
  -4   1 -14    1.46    0.83
  -5  -1 -14   -0.74    0.78
  -5  -1 -14    0.09    1.04
  -5   1 -14   -0.90    0.67
  -6  -1 -14    0.16    0.81
  -6  -1 -14    2.99    1.43
  -6   1 -14    1.73    0.78
  -7  -1 -14    0.71    0.91
  -7   1 -14    0.95    0.83
  -8  -1 -14   -0.79    0.94
  -8   1 -14   -0.80    0.86
  -9  -1 -14   -0.57    1.13
  -9   1 -14    0.25    0.99
  14  -2 -14    1.13    1.39
  14   2 -14    3.09    1.44
  13  -2 -14   11.95    1.64
  13   2 -14   12.26    1.52
  12  -2 -14    0.27    1.18
  12   2 -14    1.25    1.11
  11  -2 -14   50.27    2.63
  11   2 -14   47.67    2.48
  10  -2 -14   10.84    1.37
  10   2 -14    9.36    1.20
   9  -2 -14   16.66    1.66
   9   2 -14   15.59    1.63
   9   2 -14   14.78    1.53
   8  -2 -14   25.65    1.81
   8   2 -14   24.32    1.70
   8   2 -14   22.60    1.85
   7  -2 -14    3.89    0.99
   7   2 -14    3.95    0.99
   7   2 -14    3.39    0.91
   6  -2 -14    7.17    1.62
   6  -2 -14    5.99    1.11
   6   2 -14    3.62    0.84
   6   2 -14    4.07    0.92
   5  -2 -14    2.71    1.14
   5  -2 -14    0.99    0.91
   5   2 -14    0.96    0.82
   5   2 -14    1.98    0.74
   4  -2 -14    7.08    1.17
   4  -2 -14    6.10    1.00
   4   2 -14    7.61    0.85
   4   2 -14    5.73    0.80
   3  -2 -14   11.51    1.20
   3  -2 -14    8.38    1.06
   3   2 -14   10.32    1.05
   3   2 -14    9.69    0.91
   2  -2 -14    4.03    0.99
   2  -2 -14    3.32    0.87
   2   2 -14    2.69    0.62
   2   2 -14    3.69    0.72
   1  -2 -14   15.31    1.35
   1  -2 -14   12.92    1.44
   1   2 -14   13.95    1.03
   1   2 -14   15.96    1.13
   0  -2 -14   21.38    1.57
   0  -2 -14   22.76    1.50
   0   2 -14   21.84    1.23
   0   2 -14   20.74    1.17
  -1  -2 -14   57.89    2.44
  -1  -2 -14   59.81    2.52
  -1   2 -14   58.47    2.22
  -1   2 -14   57.51    2.18
  -2  -2 -14    2.93    0.83
  -2  -2 -14    3.89    0.99
  -2   2 -14    2.97    0.70
  -2   2 -14    2.95    0.60
  -3  -2 -14   40.83    2.11
  -3  -2 -14   41.04    2.02
  -3   2 -14   39.64    1.71
  -3   2 -14   41.46    1.80
  -4  -2 -14   -0.70    0.95
  -4  -2 -14    0.01    0.80
  -4   2 -14   -0.02    0.56
  -5  -2 -14   32.69    2.88
  -5  -2 -14   24.28    1.71
  -5   2 -14   25.17    1.42
  -6  -2 -14    4.80    1.01
  -6   2 -14    3.69    0.78
  -7  -2 -14   10.35    1.21
  -7   2 -14   12.98    1.34
  -8  -2 -14    9.71    1.32
  -8   2 -14   10.72    1.11
  -9  -2 -14    0.49    1.22
  -9   2 -14   -0.54    0.94
  14  -3 -14    1.40    1.42
  14   3 -14    0.04    1.38
  13  -3 -14    1.88    1.36
  13   3 -14    0.85    1.17
  12  -3 -14   -2.12    1.30
  12   3 -14   -1.03    1.03
  11  -3 -14    0.31    1.19
  11   3 -14    0.37    1.08
  10  -3 -14   -0.74    1.20
  10   3 -14    0.34    1.00
   9  -3 -14    1.50    1.18
   9   3 -14    0.53    1.07
   9   3 -14    0.29    0.94
   8  -3 -14    7.95    1.30
   8   3 -14    7.07    1.05
   8   3 -14    9.00    1.17
   7  -3 -14    2.41    1.12
   7   3 -14    3.71    0.85
   7   3 -14    4.68    1.02
   6  -3 -14    0.78    0.91
   6   3 -14   -0.35    0.74
   6   3 -14    0.97    0.84
   5  -3 -14    7.50    1.07
   5   3 -14    8.28    0.93
   5   3 -14    6.36    0.84
   4  -3 -14    0.59    0.92
   4  -3 -14   -0.06    1.31
   4   3 -14    1.89    0.75
   4   3 -14    0.45    0.63
   3  -3 -14    0.65    0.99
   3  -3 -14   -0.16    0.79
   3   3 -14   -0.30    0.58
   3   3 -14   -1.38    0.63
   2  -3 -14   -1.08    1.03
   2  -3 -14   -0.79    0.87
   2   3 -14   -0.83    0.60
   2   3 -14    0.38    0.51
   1  -3 -14   -0.22    1.05
   1  -3 -14   -1.23    0.72
   1   3 -14   -0.49    0.50
   1   3 -14    0.55    0.57
   0  -3 -14    2.50    0.81
   0  -3 -14    1.70    1.02
   0   3 -14    2.38    0.57
   0   3 -14    2.75    0.51
  -1  -3 -14   -0.58    0.90
  -1  -3 -14    1.41    0.77
  -1   3 -14    0.57    0.44
  -1   3 -14   -0.25    0.50
  -2  -3 -14   10.82    1.30
  -2  -3 -14   12.36    1.27
  -2   3 -14   12.48    0.92
  -2   3 -14   11.01    0.87
  -3  -3 -14    0.30    0.79
  -3  -3 -14    1.94    1.13
  -3   3 -14    1.11    0.59
  -3   3 -14    0.28    0.50
  -4  -3 -14    4.96    0.94
  -4   3 -14    4.66    0.63
  -5  -3 -14    0.78    0.86
  -5   3 -14    1.17    0.62
  -6  -3 -14    4.52    1.08
  -6   3 -14    5.28    0.77
  -7  -3 -14    0.30    1.04
  -7   3 -14    0.90    0.76
  -8  -3 -14    8.91    1.27
  -8   3 -14   12.11    1.32
  13  -4 -14   39.02    2.64
  13   4 -14   38.76    2.38
  12  -4 -14    2.26    1.36
  12   4 -14    0.06    1.15
  11  -4 -14   12.60    1.61
  11   4 -14   16.25    1.80
  10  -4 -14    2.97    1.26
  10   4 -14    3.99    0.99
   9  -4 -14   23.79    1.98
   9   4 -14   23.87    1.73
   9   4 -14   24.90    2.07
   8  -4 -14   32.76    2.13
   8   4 -14   33.84    1.86
   8   4 -14   35.28    2.02
   7  -4 -14    0.10    1.01
   7   4 -14    0.18    0.93
   7   4 -14    1.03    0.80
   6  -4 -14   64.95    2.95
   6   4 -14   62.33    2.50
   6   4 -14   61.70    2.60
   5  -4 -14    0.05    0.93
   5   4 -14    0.71    0.79
   5   4 -14    0.37    0.64
   4  -4 -14   26.63    1.76
   4   4 -14   23.33    1.38
   4   4 -14   23.15    1.34
   3  -4 -14    3.87    0.99
   3   4 -14    4.39    0.65
   3   4 -14    3.53    0.70
   2  -4 -14   23.16    1.77
   2   4 -14   22.12    1.21
   2   4 -14   26.93    1.21
   1  -4 -14    9.60    1.11
   1   4 -14    9.29    0.78
   1   4 -14    9.98    0.83
   0  -4 -14   11.13    1.53
   0  -4 -14   11.69    1.22
   0   4 -14   11.81    0.81
   0   4 -14   11.50    0.77
  -1  -4 -14   47.48    2.26
  -1  -4 -14   47.31    2.46
  -1   4 -14   49.45    1.74
  -1   4 -14   46.50    1.71
  -2  -4 -14   11.43    1.22
  -2   4 -14   10.39    0.75
  -2   4 -14   10.33    0.79
  -3  -4 -14   47.77    2.39
  -3   4 -14   46.77    1.75
  -4  -4 -14    0.13    0.96
  -4   4 -14    0.77    0.49
  -5  -4 -14   24.37    1.76
  -5   4 -14   24.76    1.28
  -6  -4 -14   11.31    1.41
  -6   4 -14   12.04    1.08
  -7  -4 -14    4.94    1.14
  -7   4 -14    6.97    0.87
  -8  -4 -14   12.87    1.60
  -8   4 -14   14.13    1.41
  13  -5 -14    1.97    1.57
  13   5 -14    1.44    1.33
  12  -5 -14   -1.64    1.29
  12   5 -14   -0.24    1.14
  11  -5 -14    2.24    1.46
  11   5 -14    1.86    1.11
  10  -5 -14   -0.65    1.20
   9  -5 -14    2.70    1.23
   8  -5 -14    0.24    1.12
   8   5 -14    2.33    1.07
   7  -5 -14   -1.17    1.03
   7   5 -14   -0.59    0.89
   6  -5 -14    0.49    1.03
   6   5 -14    1.69    0.89
   5  -5 -14    0.74    1.03
   5   5 -14   -0.51    0.75
   4  -5 -14    0.38    0.97
   4   5 -14    0.48    0.72
   3  -5 -14    2.68    1.02
   3   5 -14    1.47    0.57
   3   5 -14    0.67    0.63
   2  -5 -14    3.75    1.02
   2   5 -14    4.14    0.55
   2   5 -14    4.07    0.58
   1  -5 -14    6.62    1.20
   1   5 -14    5.35    0.53
   1   5 -14    6.88    0.57
   0  -5 -14    6.77    1.16
   0   5 -14    9.89    0.64
   0   5 -14    7.91    0.62
  -1  -5 -14    4.10    1.02
  -1   5 -14    5.40    0.51
  -1   5 -14    5.12    0.49
  -2  -5 -14   -1.17    1.02
  -2   5 -14    0.76    0.32
  -2   5 -14    0.59    0.34
  -3  -5 -14    0.00    0.94
  -3   5 -14    2.50    0.41
  -4  -5 -14   -0.42    1.06
  -4   5 -14    0.11    0.42
  -5  -5 -14   -0.93    0.97
  -5   5 -14    0.83    0.53
  -6  -5 -14   -0.06    1.15
  -6   5 -14   -0.52    0.61
  -7  -5 -14   -0.89    1.08
  -7   5 -14    1.22    0.73
  12  -6 -14    1.88    1.40
  11  -6 -14   29.95    2.41
  10  -6 -14   11.63    1.62
   9  -6 -14    8.69    1.47
   8  -6 -14   36.04    2.32
   8   6 -14   31.90    2.06
   7  -6 -14    0.89    1.28
   7   6 -14    2.72    1.00
   6  -6 -14   37.82    2.35
   6   6 -14   39.98    2.02
   5  -6 -14    0.46    1.07
   5   6 -14    1.12    0.83
   4  -6 -14   55.89    2.61
   4   6 -14   45.66    2.07
   3  -6 -14    1.40    1.09
   3   6 -14    3.10    0.63
   2  -6 -14   19.29    1.78
   2   6 -14   22.34    1.11
   1  -6 -14   35.89    2.06
   1   6 -14   30.21    1.25
   0  -6 -14    4.63    1.09
   0   6 -14    2.66    0.33
   0   6 -14    2.89    0.34
  -1  -6 -14    9.05    1.25
  -2  -6 -14    1.32    1.09
  -2   6 -14    0.71    0.20
  -3  -6 -14   37.21    2.22
  -3   6 -14   38.47    1.34
  -4  -6 -14    1.18    1.06
  -5  -6 -14   26.63    2.20
  -5   6 -14   24.42    1.19
  -6  -6 -14    7.92    1.39
  -6   6 -14   11.59    1.02
  -7  -6 -14    5.98    1.31
  11  -7 -14   10.09    1.63
  10  -7 -14    1.27    1.31
   9  -7 -14   -0.04    1.39
   8  -7 -14    1.91    1.44
   7  -7 -14   11.78    1.54
   7   7 -14    8.27    1.20
   6  -7 -14    0.86    1.25
   6   7 -14    0.50    0.96
   5  -7 -14   -0.47    1.13
   5   7 -14   -0.21    0.81
   4  -7 -14   -0.92    1.10
   4   7 -14    0.40    0.72
   3  -7 -14    0.85    1.08
   3   7 -14   -0.44    0.62
   2  -7 -14    3.88    1.28
   1  -7 -14    0.82    1.08
   1   7 -14    0.27    0.40
   0  -7 -14    4.89    1.22
   0   7 -14    4.36    0.46
  -1  -7 -14    3.13    1.28
  -2  -7 -14   -0.99    1.18
  -3  -7 -14    1.99    1.12
  -4  -7 -14    0.90    1.18
  -4   7 -14    0.12    0.37
  -5  -7 -14    2.81    1.23
  -5   7 -14   -0.41    0.48
  -6  -7 -14    1.10    1.25
  10  -8 -14    9.54    1.63
   9  -8 -14    9.69    1.74
   8  -8 -14   11.46    1.78
   7  -8 -14    0.13    1.27
   7   8 -14    1.07    1.08
   6  -8 -14   21.74    2.17
   6   8 -14   23.17    1.82
   5  -8 -14    2.51    1.33
   5   8 -14    2.95    0.93
   4  -8 -14   12.87    1.58
   4   8 -14   15.29    1.30
   3  -8 -14    3.61    1.27
   3   8 -14    4.29    0.72
   2  -8 -14   39.36    2.44
   2   8 -14   38.60    1.62
   1  -8 -14   12.96    1.58
   1   8 -14   17.35    0.92
   0  -8 -14    2.75    1.24
   0   8 -14    1.75    0.37
  -1  -8 -14    8.27    1.48
  -1   8 -14    7.57    0.46
  -2  -8 -14   -0.10    1.30
  -3  -8 -14    4.48    1.43
  -3   8 -14    3.28    0.33
  -4  -8 -14    0.12    1.35
  -4   8 -14    1.37    0.39
   8  -9 -14   -1.35    1.43
   7  -9 -14    1.54    1.34
   6  -9 -14   -2.60    1.25
   6   9 -14   -0.76    1.09
   5  -9 -14    9.47    1.58
   5   9 -14   10.01    1.16
   4  -9 -14   -0.14    1.37
   4   9 -14    0.58    0.84
   3  -9 -14    6.30    1.42
   3   9 -14    5.20    0.82
   2  -9 -14   -1.49    1.35
   2   9 -14    0.67    0.62
   1  -9 -14    6.07    1.45
   1   9 -14    6.87    0.63
   0  -9 -14    3.60    1.38
   0   9 -14    3.94    0.49
  -1  -9 -14   -1.69    1.21
  -1   9 -14   -0.59    0.36
  -2  -9 -14   -1.12    1.37
  -2   9 -14    0.56    0.35
  -3  -9 -14   -1.15    1.39
  -3   9 -14    0.53    0.38
   5 -10 -14    1.02    1.37
   5  10 -14    0.60    1.04
   4 -10 -14   25.53    2.32
   4  10 -14   24.37    1.76
   3 -10 -14    1.34    1.49
   3  10 -14    1.78    0.84
   2 -10 -14    7.53    1.59
   2  10 -14    8.57    0.88
   1 -10 -14    0.62    1.51
   1  10 -14    0.37    0.60
   0 -10 -14    2.98    1.46
   0  10 -14    3.57    0.61
  13   0 -15   -1.14    1.18
  12   0 -15   -1.53    1.10
  11   0 -15    0.04    1.07
  10   0 -15    0.08    1.12
   9   0 -15    0.94    1.06
   8   0 -15    1.91    0.91
   7   0 -15   -1.63    0.96
   7   0 -15   -0.46    0.92
   6   0 -15    0.63    1.00
   6   0 -15   -1.12    0.81
   5   0 -15    1.71    0.97
   5   0 -15   -0.69    0.81
   4   0 -15    0.37    0.87
   4   0 -15    0.32    0.77
   3   0 -15    1.07    0.88
   3   0 -15    0.05    0.70
   2   0 -15    0.06    0.82
   2   0 -15   -0.35    0.69
   1   0 -15   -0.07    0.70
   1   0 -15   -1.21    0.81
   0   0 -15    0.46    0.68
   0   0 -15   -1.12    0.79
  -1   0 -15    1.12    0.84
  -1   0 -15    0.05    0.66
  -2   0 -15   -0.08    0.68
  -2   0 -15    2.11    0.87
  -3   0 -15    0.44    0.92
  -3   0 -15   -0.47    0.71
  -4   0 -15    0.20    0.76
  -4   0 -15   -0.64    0.98
  -5   0 -15   -0.01    0.78
  -5   0 -15    0.19    1.07
  -6   0 -15    0.00    0.80
  -7   0 -15    0.32    0.94
  13  -1 -15    7.25    1.50
  13   1 -15    9.66    1.48
  12  -1 -15   11.55    1.54
  12   1 -15   12.90    1.53
  11  -1 -15    5.25    1.39
  11   1 -15    6.40    1.25
  10  -1 -15   44.29    2.45
  10   1 -15   45.58    2.48
   9  -1 -15   -1.75    0.93
   9   1 -15   -0.55    0.96
   8  -1 -15   21.38    1.81
   8   1 -15   18.31    2.04
   8   1 -15   18.38    1.67
   7  -1 -15    6.05    1.93
   7  -1 -15    3.32    0.95
   7   1 -15    2.06    1.02
   7   1 -15    1.82    0.94
   6  -1 -15   17.26    1.64
   6  -1 -15   20.22    1.83
   6   1 -15   21.90    1.67
   6   1 -15   16.50    1.44
   5  -1 -15   12.76    1.43
   5  -1 -15   12.60    1.28
   5   1 -15   13.86    1.43
   5   1 -15   13.67    1.29
   4  -1 -15    1.49    0.85
   4  -1 -15    0.47    0.95
   4   1 -15    0.94    0.86
   4   1 -15    0.96    0.76
   3  -1 -15    9.52    1.13
   3  -1 -15    9.06    1.03
   3   1 -15   12.40    1.23
   3   1 -15    9.85    0.93
   2  -1 -15    8.88    1.07
   2  -1 -15    4.59    0.89
   2   1 -15    6.55    0.91
   2   1 -15    5.41    0.79
   1  -1 -15   22.27    1.59
   1  -1 -15   22.05    1.45
   1   1 -15   21.37    1.43
   1   1 -15   20.42    1.28
   0  -1 -15    0.29    0.76
   0  -1 -15   -0.69    0.83
   0   1 -15   -0.02    0.75
   0   1 -15    1.34    0.65
  -1  -1 -15   27.24    1.59
  -1  -1 -15   31.48    1.84
  -1   1 -15   28.19    1.46
  -1   1 -15   27.88    1.61
  -2  -1 -15    3.46    1.01
  -2  -1 -15    3.82    0.85
  -2   1 -15    5.95    0.88
  -2   1 -15    3.94    0.73
  -3  -1 -15   19.25    1.50
  -3  -1 -15   18.80    1.64
  -3   1 -15   18.36    1.50
  -3   1 -15   19.67    1.31
  -4  -1 -15   43.03    2.05
  -4  -1 -15   44.10    2.23
  -4   1 -15   40.56    1.90
  -4   1 -15   39.75    2.05
  -5  -1 -15    0.12    0.88
  -5   1 -15    2.56    1.02
  -5   1 -15    0.54    0.74
  -6  -1 -15   18.92    1.60
  -6   1 -15   23.46    1.82
  -6   1 -15   19.16    1.52
  -7  -1 -15    0.86    0.97
  -7   1 -15    3.77    0.95
  13  -2 -15    5.47    1.46
  13   2 -15    2.16    1.38
  12  -2 -15    1.79    1.27
  12   2 -15    3.54    1.34
  11  -2 -15   -2.00    1.11
  11   2 -15    2.08    1.19
  10  -2 -15   -0.09    1.21
  10   2 -15    1.18    1.06
   9  -2 -15    0.46    1.03
   9   2 -15   -0.20    0.96
   8  -2 -15   -0.27    0.98
   8   2 -15   -0.03    0.89
   8   2 -15    0.38    1.09
   7  -2 -15    0.85    1.07
   7   2 -15    2.08    1.05
   7   2 -15    1.24    0.89
   6  -2 -15    1.96    1.93
   6  -2 -15   -0.72    0.85
   6   2 -15   -0.64    0.73
   6   2 -15   -0.32    0.94
   5  -2 -15    0.72    0.95
   5  -2 -15   -0.01    1.16
   5   2 -15    1.71    0.91
   5   2 -15    0.05    0.71
   4  -2 -15    5.63    1.03
   4  -2 -15    4.69    1.06
   4   2 -15    5.56    0.82
   4   2 -15    5.43    0.91
   3  -2 -15    1.51    0.80
   3  -2 -15    2.43    0.98
   3   2 -15    1.29    0.66
   3   2 -15    1.95    0.80
   2  -2 -15    0.12    0.84
   2  -2 -15    1.28    0.97
   2   2 -15    0.70    0.73
   2   2 -15    0.67    0.62
   1  -2 -15    2.77    1.02
   1  -2 -15    2.97    0.91
   1   2 -15    3.55    0.67
   1   2 -15    3.76    0.78
   0  -2 -15    1.13    0.85
   0  -2 -15    0.60    0.98
   0   2 -15   -0.43    0.69
   0   2 -15    0.81    0.59
  -1  -2 -15    0.40    0.99
  -1  -2 -15    1.79    0.83
  -1   2 -15    0.69    0.73
  -1   2 -15    1.51    0.60
  -2  -2 -15    8.32    1.04
  -2  -2 -15    7.51    1.13
  -2   2 -15    7.67    0.87
  -2   2 -15    9.21    1.00
  -3  -2 -15    1.80    1.06
  -3  -2 -15    1.18    0.86
  -3   2 -15   -0.20    0.59
  -3   2 -15   -0.31    0.75
  -4  -2 -15    7.11    1.08
  -4   2 -15    7.76    0.97
  -4   2 -15    7.18    0.81
  -5  -2 -15    1.08    0.96
  -5   2 -15   -0.42    0.67
  -6  -2 -15    0.47    1.00
  -6   2 -15    0.95    0.77
  -7  -2 -15   -0.45    1.05
  -7   2 -15   -0.79    0.80
  13  -3 -15   15.95    1.80
  13   3 -15   14.13    1.72
  12  -3 -15    9.32    1.69
  12   3 -15   10.56    1.55
  11  -3 -15    6.09    1.42
  11   3 -15    6.85    1.31
  10  -3 -15   52.14    2.70
  10   3 -15   48.55    2.58
   9  -3 -15   -0.96    1.18
   9   3 -15    0.80    0.99
   8  -3 -15  101.51    4.09
   8   3 -15   98.36    3.90
   8   3 -15  102.80    3.88
   7  -3 -15    0.48    0.99
   7   3 -15    0.16    0.83
   7   3 -15   -0.92    0.99
   6  -3 -15   26.76    1.80
   6   3 -15   25.72    1.76
   6   3 -15   25.96    1.56
   5  -3 -15   11.00    1.25
   5   3 -15   14.76    1.26
   5   3 -15   13.85    1.39
   4  -3 -15   32.92    2.73
   4  -3 -15   24.77    1.74
   4   3 -15   28.43    1.49
   4   3 -15   27.58    1.60
   3  -3 -15   33.19    1.88
   3  -3 -15   32.60    2.20
   3   3 -15   33.23    1.67
   3   3 -15   34.01    1.59
   2  -3 -15    4.08    1.09
   2  -3 -15    2.33    0.99
   2   3 -15    3.26    0.64
   2   3 -15    2.24    0.73
   1  -3 -15    9.07    1.31
   1  -3 -15    7.18    1.03
   1   3 -15    9.90    0.92
   1   3 -15   10.58    1.05
   0  -3 -15   -2.32    0.79
   0  -3 -15   -2.52    1.03
   0   3 -15    0.27    0.51
   0   3 -15   -1.00    0.58
  -1  -3 -15   32.42    2.33
  -1  -3 -15   28.62    1.80
  -1   3 -15   25.24    1.28
  -1   3 -15   29.11    1.36
  -2  -3 -15    4.14    1.00
  -2   3 -15    4.21    0.69
  -2   3 -15    4.08    0.61
  -3  -3 -15   29.90    1.94
  -3   3 -15   31.88    1.50
  -3   3 -15   30.85    1.43
  -4  -3 -15   14.98    1.64
  -4   3 -15   14.02    1.24
  -4   3 -15   14.24    1.10
  -5  -3 -15    0.12    1.01
  -5   3 -15    1.76    0.69
  -6  -3 -15    9.92    1.23
  -6   3 -15   11.86    1.22
  -7  -3 -15    0.25    1.13
  -7   3 -15    1.44    0.83
  12  -4 -15    1.61    1.37
  12   4 -15    0.51    1.23
  11  -4 -15   -0.78    1.24
  11   4 -15   -0.90    0.96
  10  -4 -15    6.52    1.38
  10   4 -15    3.70    1.03
   9  -4 -15    2.97    1.22
   9   4 -15    2.75    1.05
   8  -4 -15    4.67    1.24
   8   4 -15    7.34    1.24
   8   4 -15    4.07    0.97
   7  -4 -15    0.38    1.06
   7   4 -15    0.57    0.80
   7   4 -15    0.59    1.01
   6  -4 -15    2.79    1.22
   6   4 -15    4.01    1.01
   6   4 -15    5.59    0.88
   5  -4 -15    1.68    1.01
   5   4 -15    2.51    0.77
   5   4 -15    2.41    0.90
   4  -4 -15    1.00    0.96
   4   4 -15    1.43    0.80
   4   4 -15    0.80    0.66
   3  -4 -15    2.13    0.99
   3   4 -15    2.50    0.74
   3   4 -15    4.87    0.68
   2  -4 -15    1.48    0.94
   2   4 -15    0.06    0.60
   2   4 -15    0.34    0.54
   1  -4 -15   15.36    1.67
   1   4 -15   15.22    1.01
   1   4 -15   14.36    0.95
   0  -4 -15   -0.16    0.85
   0   4 -15   -0.78    0.42
   0   4 -15    0.29    0.51
  -1  -4 -15    3.73    1.05
  -1   4 -15    4.90    0.57
  -1   4 -15    4.16    0.52
  -2  -4 -15   -0.46    0.98
  -2   4 -15    1.95    0.47
  -2   4 -15    0.88    0.52
  -3  -4 -15    1.13    0.92
  -3   4 -15    1.14    0.50
  -3   4 -15    0.32    0.55
  -4  -4 -15    0.41    1.04
  -4   4 -15    0.35    0.52
  -5  -4 -15    4.56    1.20
  -5   4 -15    6.24    0.73
  -6  -4 -15   -1.90    1.01
  -6   4 -15    1.07    0.69
  12  -5 -15   16.63    1.83
  12   5 -15   12.53    1.60
  11  -5 -15   10.00    1.59
  11   5 -15    5.59    1.15
  10  -5 -15    9.45    1.56
  10   5 -15   10.33    1.31
   9  -5 -15    0.31    1.22
   9   5 -15    0.94    1.00
   8  -5 -15    9.74    1.45
   8   5 -15   11.46    1.37
   8   5 -15    9.56    1.14
   7  -5 -15    4.85    1.26
   7   5 -15    3.78    0.88
   7   5 -15    4.91    1.11
   6  -5 -15   12.98    1.57
   6   5 -15   14.34    1.48
   6   5 -15   13.42    1.30
   5  -5 -15   27.05    2.02
   5   5 -15   30.03    1.72
   5   5 -15   29.88    1.58
   4  -5 -15    3.50    1.10
   4   5 -15    1.28    0.76
   4   5 -15    3.41    0.70
   3  -5 -15   36.24    2.14
   3   5 -15   38.22    1.63
   3   5 -15   35.64    1.66
   2  -5 -15    0.44    0.96
   2   5 -15    0.76    0.51
   2   5 -15    0.70    0.57
   1  -5 -15   13.70    1.39
   1   5 -15   15.31    0.88
   1   5 -15   14.93    0.94
   0  -5 -15    0.55    1.07
   0   5 -15    0.73    0.44
   0   5 -15    0.77    0.39
  -1  -5 -15   19.70    1.72
  -1   5 -15   19.93    0.93
  -1   5 -15   19.13    0.88
  -2  -5 -15    1.77    1.05
  -2   5 -15    0.84    0.37
  -2   5 -15    0.62    0.41
  -3  -5 -15   33.74    2.20
  -3   5 -15   30.72    1.26
  -3   5 -15   31.92    1.31
  -4  -5 -15   10.75    1.37
  -4   5 -15   13.89    0.90
  -5  -5 -15   13.70    1.56
  -5   5 -15   13.18    1.00
  -6  -5 -15    4.58    1.25
  -6   5 -15    4.16    0.75
  11  -6 -15    4.26    1.64
  11   6 -15    4.90    1.19
  10  -6 -15   -1.12    1.34
   9  -6 -15   -0.08    1.28
   8  -6 -15   -0.74    1.18
   7  -6 -15    9.75    1.51
   7   6 -15   10.46    1.26
   6  -6 -15    3.51    1.24
   6   6 -15    2.06    0.98
   5  -6 -15    0.56    1.17
   5   6 -15    2.77    0.89
   4  -6 -15    0.34    1.08
   4   6 -15   -0.44    0.72
   3  -6 -15    1.11    1.20
   3   6 -15    2.39    0.60
   3   6 -15    2.09    0.66
   2  -6 -15    0.20    1.16
   2   6 -15    0.60    0.47
   2   6 -15   -0.20    0.51
   1  -6 -15    1.99    1.18
   1   6 -15    0.77    0.42
   1   6 -15    1.11    0.44
   0  -6 -15    3.16    1.23
   0   6 -15    0.85    0.34
   0   6 -15    0.47    0.31
  -1  -6 -15    2.77    1.13
  -1   6 -15    2.37    0.26
  -1   6 -15    1.92    0.30
  -2  -6 -15   17.23    1.79
  -2   6 -15   18.67    0.71
  -2   6 -15   17.50    0.73
  -3  -6 -15    4.31    1.30
  -3   6 -15    4.55    0.51
  -4  -6 -15    0.66    1.22
  -4   6 -15    2.11    0.45
  -5  -6 -15    1.37    1.19
  -5   6 -15    2.66    0.59
  10  -7 -15   11.76    1.75
   9  -7 -15    1.07    1.41
   8  -7 -15    6.41    1.52
   7  -7 -15   20.89    2.19
   7   7 -15   23.10    1.79
   6  -7 -15   28.30    2.43
   6   7 -15   25.19    1.82
   5  -7 -15    9.34    1.47
   5   7 -15    7.54    1.02
   4  -7 -15    7.36    1.47
   4   7 -15    5.89    0.86
   3  -7 -15   21.71    2.00
   3   7 -15   21.34    1.28
   2  -7 -15   -0.25    1.15
   2   7 -15    0.14    0.53
   1  -7 -15   25.11    2.03
   1   7 -15   23.30    1.04
   1   7 -15   24.38    1.04
   0  -7 -15   16.58    1.84
   0   7 -15   13.93    0.63
   0   7 -15   13.85    0.65
  -1  -7 -15   -0.22    1.15
  -2  -7 -15    1.13    1.19
  -3  -7 -15    2.24    1.24
  -4  -7 -15    1.93    1.27
  -4   7 -15    2.51    0.39
   8  -8 -15   -2.32    1.41
   7  -8 -15   -0.72    1.31
   6  -8 -15    0.98    1.50
   6   8 -15   -0.01    1.03
   5  -8 -15    4.56    1.44
   5   8 -15    5.99    1.00
   4  -8 -15   -0.12    1.30
   4   8 -15    1.21    0.80
   3  -8 -15    1.15    1.28
   3   8 -15    0.05    0.67
   2  -8 -15   -1.43    1.29
   2   8 -15   -0.95    0.52
   1  -8 -15   -2.81    1.13
   1   8 -15    0.01    0.40
   0  -8 -15    0.29    1.24
   0   8 -15   -0.22    0.28
  -1  -8 -15   -0.04    1.21
  -2  -8 -15    0.74    1.27
   5  -9 -15   13.59    1.88
   5   9 -15   11.92    1.23
   4  -9 -15   12.23    1.69
   4   9 -15   12.96    1.37
   3  -9 -15   38.65    2.51
   3   9 -15   32.27    1.67
   2  -9 -15   -0.27    1.31
   2   9 -15    1.75    0.63
   1  -9 -15   14.82    1.81
   1   9 -15   11.73    0.87
  12   0 -16   15.56    1.66
  11   0 -16    5.40    1.40
  10   0 -16   52.01    2.65
   9   0 -16   29.14    1.97
   8   0 -16   22.33    1.84
   7   0 -16   59.67    2.64
   6   0 -16    9.63    1.34
   6   0 -16    6.17    1.11
   5   0 -16   54.09    2.49
   5   0 -16   50.14    2.39
   4   0 -16    2.51    1.01
   4   0 -16    1.67    0.87
   3   0 -16   14.81    1.54
   3   0 -16   15.97    1.37
   2   0 -16   14.88    1.36
   2   0 -16   14.52    1.47
   1   0 -16    3.85    1.03
   1   0 -16    4.20    0.83
   0   0 -16   17.06    1.36
   0   0 -16   15.80    1.58
  -1   0 -16   -0.96    0.90
  -1   0 -16    1.08    0.75
  -2   0 -16   25.44    1.58
  -2   0 -16   24.72    1.76
  -3   0 -16    1.69    0.82
  -3   0 -16    1.02    1.03
  -4   0 -16   45.62    2.25
  -4   0 -16   52.42    2.45
  -5   0 -16    2.36    0.91
  -6   0 -16    5.31    1.06
  12  -1 -16    2.19    1.43
  12   1 -16    1.62    1.23
  11  -1 -16    1.46    1.21
  11   1 -16    2.36    1.31
  10  -1 -16    1.73    1.29
  10   1 -16    0.14    1.01
   9  -1 -16   -0.60    1.00
   9   1 -16    1.04    1.09
   8  -1 -16   -0.19    1.07
   8   1 -16   -0.52    0.99
   7  -1 -16    0.21    1.05
   7   1 -16    1.06    0.98
   6  -1 -16    2.57    0.92
   6   1 -16    3.61    1.14
   6   1 -16    0.05    0.88
   5  -1 -16    0.41    0.93
   5  -1 -16   -0.06    1.26
   5   1 -16    0.07    0.79
   5   1 -16   -0.40    0.96
   4  -1 -16    0.17    0.85
   4  -1 -16    1.93    1.12
   4   1 -16    0.86    0.92
   4   1 -16    2.11    0.83
   3  -1 -16   -1.43    1.00
   3  -1 -16   -0.42    0.83
[truncated: 17,756 more chars]
